# Supplementary material for: Punctaporonins N–S, New Caryophyllene Sesquiterpenoids from Cytospora sp
Source: Biomed Res Int. 2017 Oct 24;2017:7871459. doi: 10.1155/2017/7871459 (PMC5674490; doi:10.1155/2017/7871459)
Supplement: Supplementary file 1 — NMR spectra of compounds 1–6 and X-ray crystallographic data for 1a were available in the supplementary. [file 7871459.f1.zip]

Archive with 3 entries (2 files):
- new supplementary materials/Supporting Information.doc
- new supplementary materials/sa651.cif
- new supplementary materials/
