# Supplementary material for: Punctaporonins N–S, New Caryophyllene Sesquiterpenoids from Cytospora sp
Source: Biomed Res Int. 2017 Oct 24;2017:7871459. doi: 10.1155/2017/7871459 (PMC5674490; doi:10.1155/2017/7871459)
Supplement: Supplementary file 1 — NMR spectra of compounds 1–6 and X-ray crystallographic data for 1a were available in the supplementary. [file 7871459.f1.zip › new supplementary materials/sa651.cif]

data_sa651
_audit_creation_date              2017-08-16
_audit_creation_method
;
Olex2 1.2
(compiled 2017.08.10 svn.r3458 for OlexSys, GUI svn.r5375)
;
_shelx_SHELXL_version_number      '2016/6'
_publ_contact_author_address      ?
_publ_contact_author_email        ?
_publ_contact_author_id_orcid     ?
_publ_contact_author_name         ''
_publ_contact_author_phone        ?
_publ_section_references
;
Dolomanov, O.V., Bourhis, L.J., Gildea, R.J, Howard, J.A.K. & Puschmann, H.
 (2009), J. Appl. Cryst. 42, 339-341.

Sheldrick, G.M. (2015). Acta Cryst. C71, 3-8.
;
_chemical_name_common             ?
_chemical_name_systematic
;
 ? 
;
_chemical_formula_moiety          'C26 H33 F3 O6, H2 O'
_chemical_formula_sum             'C26 H35 F3 O7'
_chemical_formula_weight          516.54
_chemical_absolute_configuration  rm
_chemical_melting_point           ?
loop_
  _atom_type_symbol
  _atom_type_description
  _atom_type_scat_dispersion_real
  _atom_type_scat_dispersion_imag
  _atom_type_scat_source
 'C' 'C' 0.0033 0.0016 'International Tables Vol C Tables 4.2.6.8 and 6.1.1.4'
 'H' 'H' 0.0000 0.0000 'International Tables Vol C Tables 4.2.6.8 and 6.1.1.4'
 'O' 'O' 0.0106 0.0060 'International Tables Vol C Tables 4.2.6.8 and 6.1.1.4'
 'F' 'F' 0.0171 0.0103 'International Tables Vol C Tables 4.2.6.8 and 6.1.1.4'

_shelx_space_group_comment
;
The symmetry employed for this shelxl refinement is uniquely defined
by the following loop, which should always be used as a source of
symmetry information in preference to the above space-group names.
They are only intended as comments.
;
_space_group_crystal_system       'orthorhombic'
_space_group_IT_number            19
_space_group_name_H-M_alt         'P 21 21 21'
_space_group_name_Hall            'P 2ac 2ab'
loop_
  _space_group_symop_operation_xyz
 'x, y, z'
 '-x+1/2, -y, z+1/2'
 '-x, y+1/2, -z+1/2'
 'x+1/2, -y+1/2, -z'

_cell_length_a                    6.9639(14)
_cell_length_b                    17.211(3)
_cell_length_c                    21.948(5)
_cell_angle_alpha                 90
_cell_angle_beta                  90
_cell_angle_gamma                 90
_cell_volume                      2630.5(9)
_cell_formula_units_Z             4
_cell_measurement_reflns_used     921
_cell_measurement_temperature     173(2)
_cell_measurement_theta_max       27.48
_cell_measurement_theta_min       2.17
_shelx_estimated_absorpt_T_max    0.992
_shelx_estimated_absorpt_T_min    0.910
_exptl_absorpt_coefficient_mu     0.107
_exptl_absorpt_correction_T_max   0.9915
_exptl_absorpt_correction_T_min   0.9099
_exptl_absorpt_correction_type    numerical
_exptl_absorpt_process_details    'CrystalClear (Rigaku Inc., 2008)'
_exptl_absorpt_special_details    ?
_exptl_crystal_colour             colorless
_exptl_crystal_density_diffrn     1.304
_exptl_crystal_density_meas       ?
_exptl_crystal_density_method     'not measured'
_exptl_crystal_description        needle
_exptl_crystal_F_000              1096
_exptl_crystal_size_max           0.9
_exptl_crystal_size_mid           0.27
_exptl_crystal_size_min           0.08
_exptl_special_details
;
 ? 
;
_exptl_transmission_factor_max    ?
_exptl_transmission_factor_min    ?
_diffrn_reflns_av_R_equivalents   0.0618
_diffrn_reflns_av_unetI/netI      0.0721
_diffrn_reflns_Laue_measured_fraction_full 0.996
_diffrn_reflns_Laue_measured_fraction_max 0.996
_diffrn_reflns_limit_h_max        8
_diffrn_reflns_limit_h_min        -8
_diffrn_reflns_limit_k_max        20
_diffrn_reflns_limit_k_min        -15
_diffrn_reflns_limit_l_max        22
_diffrn_reflns_limit_l_min        -26
_diffrn_reflns_number             14274
_diffrn_reflns_point_group_measured_fraction_full 0.996
_diffrn_reflns_point_group_measured_fraction_max 0.996
_diffrn_reflns_theta_full         25.242
_diffrn_reflns_theta_max          25.313
_diffrn_reflns_theta_min          2.367
_diffrn_ambient_temperature       173.15
_diffrn_detector_area_resol_mean  ?
_diffrn_measured_fraction_theta_full 0.996
_diffrn_measured_fraction_theta_max 0.996
_diffrn_measurement_device_type   'Saturn724+ CCD'
_diffrn_measurement_method        '\w scans at fixed \c = 45\%'
_diffrn_radiation_type            MoK\a
_diffrn_radiation_wavelength      0.71073
_diffrn_source                    'Sealed Tube'
_reflns_Friedel_coverage          0.740
_reflns_Friedel_fraction_full     0.995
_reflns_Friedel_fraction_max      0.995
_reflns_number_gt                 4150
_reflns_number_total              4799
_reflns_special_details
;
 Reflections were merged by SHELXL according to the crystal
 class for the calculation of statistics and refinement.
 
 _reflns_Friedel_fraction is defined as the number of unique
 Friedel pairs measured divided by the number that would be
 possible theoretically, ignoring centric projections and
 systematic absences.
;
_reflns_threshold_expression      'I > 2\s(I)'
_computing_cell_refinement        'CrystalClear (Rigaku Inc., 2008)'
_computing_data_collection        'CrystalClear (Rigaku Inc., 2008)'
_computing_data_reduction         'CrystalClear (Rigaku Inc., 2008)'
_computing_molecular_graphics     'Olex2 (Dolomanov et al., 2009)'
_computing_publication_material   'CIFTAB (Sheldrick, 2013)'
_computing_structure_refinement   'ShelXL (Sheldrick, 2015)'
_computing_structure_solution     'SHELXS-97 (Sheldrick, 1990)'
_refine_diff_density_max          0.171
_refine_diff_density_min          -0.179
_refine_diff_density_rms          0.046
_refine_ls_abs_structure_details
;
 Flack x determined using 1084 quotients [(I+)-(I-)]/[(I+)+(I-)]
 (Parsons, Flack and Wagner, Acta Cryst. B69 (2013) 249-259).
;
_refine_ls_abs_structure_Flack    0.5(7)
_refine_ls_extinction_coef        .
_refine_ls_extinction_method      none
_refine_ls_goodness_of_fit_ref    1.213
_refine_ls_hydrogen_treatment     constr
_refine_ls_matrix_type            full
_refine_ls_number_parameters      330
_refine_ls_number_reflns          4799
_refine_ls_number_restraints      0
_refine_ls_R_factor_all           0.0948
_refine_ls_R_factor_gt            0.0811
_refine_ls_restrained_S_all       1.213
_refine_ls_shift/su_max           0.001
_refine_ls_shift/su_mean          0.000
_refine_ls_structure_factor_coef  Fsqd
_refine_ls_weighting_details
'w=1/[\s^2^(Fo^2^)+(0.0181P)^2^+1.9056P] where P=(Fo^2^+2Fc^2^)/3'
_refine_ls_weighting_scheme       calc
_refine_ls_wR_factor_gt           0.1232
_refine_ls_wR_factor_ref          0.1283
_refine_special_details           ?
_olex2_refinement_description
;
1. Fixed Uiso
 At 1.2 times of:
  All C(H) groups, All C(H,H) groups, All O(H) groups, All O(H,H) groups
 At 1.5 times of:
  All C(H,H,H) groups
2.a Riding coordinates:
 O1W(H1WA,H1WB), O1(H1), O2(H2)
2.b Ternary CH refined with riding coordinates:
 C2(H2A), C6(H6)
2.c Secondary CH2 refined with riding coordinates:
 C3(H3A,H3B), C7(H7A,H7B), C12(H12A,H12B)
2.d Aromatic/amide H refined with riding coordinates:
 C9(H9), C10(H10), C11(H11), C20(H20), C21(H21), C22(H22), C23(H23), C24(H24)
2.e Idealised Me refined as rotating group:
 C13(H13A,H13B,H13C), C14(H14A,H14B,H14C), C15(H15A,H15B,H15C), C16(H16A,H16B,
 H16C), C25(H25A,H25B,H25C)
;
_atom_sites_solution_hydrogens    mixed
_atom_sites_solution_primary      ?
_atom_sites_solution_secondary    ?
loop_
  _atom_site_label
  _atom_site_type_symbol
  _atom_site_fract_x
  _atom_site_fract_y
  _atom_site_fract_z
  _atom_site_U_iso_or_equiv
  _atom_site_adp_type
  _atom_site_occupancy
  _atom_site_site_symmetry_order
  _atom_site_calc_flag
  _atom_site_refinement_flags_posn
  _atom_site_refinement_flags_adp
  _atom_site_refinement_flags_occupancy
  _atom_site_disorder_assembly
  _atom_site_disorder_group
 F1 F -0.0004(7) 0.8345(2) 0.26996(18) 0.0693(13) Uani 1 1 d . . . . .
 F2 F 0.1663(6) 0.88385(19) 0.34274(18) 0.0562(11) Uani 1 1 d . . . . .
 F3 F -0.0989(5) 0.8246(2) 0.36234(19) 0.0590(11) Uani 1 1 d . . . . .
 O1W O 0.7280(5) 0.3286(2) 0.5224(2) 0.0409(11) Uani 1 1 d . . . . .
 H1WA H 0.774067 0.287158 0.508517 0.049 Uiso 1 1 d R . . . .
 H1WB H 0.795258 0.345518 0.551277 0.049 Uiso 1 1 d R . . . .
 O1 O 0.5236(5) 0.4667(2) 0.48170(18) 0.0330(9) Uani 1 1 d . . . . .
 H1 H 0.582851 0.427009 0.493714 0.040 Uiso 1 1 d R . . . .
 O2 O 0.3326(5) 0.3166(2) 0.52276(19) 0.0371(10) Uani 1 1 d . . . . .
 H2 H 0.445956 0.331544 0.528591 0.045 Uiso 1 1 d R . . . .
 O3 O -0.0477(5) 0.3852(2) 0.61922(18) 0.0341(10) Uani 1 1 d . . . . .
 O4 O 0.3613(5) 0.6718(2) 0.39824(17) 0.0303(9) Uani 1 1 d . . . . .
 O5 O 0.1902(6) 0.7695(2) 0.44059(18) 0.0371(10) Uani 1 1 d . . . . .
 O6 O 0.3136(6) 0.7433(2) 0.28773(18) 0.0407(11) Uani 1 1 d . . . . .
 C1 C 0.2426(8) 0.5872(3) 0.4777(3) 0.0289(13) Uani 1 1 d . . . . .
 C2 C 0.2171(8) 0.5117(3) 0.4448(3) 0.0296(13) Uani 1 1 d . . . . .
 H2A H 0.077905 0.497656 0.446849 0.036 Uiso 1 1 calc R . . . .
 C3 C 0.2871(8) 0.4953(3) 0.3789(3) 0.0349(14) Uani 1 1 d . . . . .
 H3A H 0.402342 0.525430 0.367046 0.042 Uiso 1 1 calc R . . . .
 H3B H 0.184930 0.499980 0.347701 0.042 Uiso 1 1 calc R . . . .
 C4 C 0.3311(8) 0.4101(3) 0.3980(3) 0.0325(14) Uani 1 1 d . . . . .
 C5 C 0.3342(8) 0.4396(3) 0.4659(3) 0.0291(13) Uani 1 1 d . . . . .
 C6 C 0.2460(8) 0.3924(3) 0.5166(3) 0.0309(13) Uani 1 1 d . . . . .
 H6 H 0.107549 0.384364 0.506292 0.037 Uiso 1 1 calc R . . . .
 C7 C 0.2540(8) 0.4378(3) 0.5779(3) 0.0313(14) Uani 1 1 d . . . . .
 H7A H 0.332761 0.407521 0.606908 0.038 Uiso 1 1 calc R . . . .
 H7B H 0.321474 0.487583 0.570496 0.038 Uiso 1 1 calc R . . . .
 C8 C 0.0615(8) 0.4560(3) 0.6084(3) 0.0313(14) Uani 1 1 d . . . . .
 C9 C -0.0798(8) 0.5039(3) 0.5724(3) 0.0332(14) Uani 1 1 d . . . . .
 H9 H -0.208146 0.485152 0.573376 0.040 Uiso 1 1 calc R . . . .
 C10 C -0.0547(9) 0.5680(3) 0.5396(3) 0.0355(15) Uani 1 1 d . . . . .
 H10 H -0.170194 0.591235 0.525502 0.043 Uiso 1 1 calc R . . . .
 C11 C 0.1229(8) 0.6096(3) 0.5213(3) 0.0335(14) Uani 1 1 d . . . . .
 H11 H 0.153248 0.656154 0.542480 0.040 Uiso 1 1 calc R . . . .
 C12 C 0.4040(8) 0.6397(3) 0.4589(3) 0.0343(14) Uani 1 1 d . . . . .
 H12A H 0.418270 0.682409 0.488792 0.041 Uiso 1 1 calc R . . . .
 H12B H 0.525852 0.610139 0.457629 0.041 Uiso 1 1 calc R . . . .
 C13 C 0.1619(9) 0.3573(3) 0.3844(3) 0.0427(16) Uani 1 1 d . . . . .
 H13A H 0.181799 0.306855 0.404134 0.064 Uiso 1 1 calc GR . . . .
 H13B H 0.150956 0.349841 0.340223 0.064 Uiso 1 1 calc GR . . . .
 H13C H 0.043716 0.380987 0.399908 0.064 Uiso 1 1 calc GR . . . .
 C14 C 0.5182(9) 0.3755(3) 0.3736(3) 0.0445(17) Uani 1 1 d . . . . .
 H14A H 0.544478 0.326264 0.394393 0.067 Uiso 1 1 calc GR . . . .
 H14B H 0.623965 0.411859 0.381143 0.067 Uiso 1 1 calc GR . . . .
 H14C H 0.506070 0.366334 0.329733 0.067 Uiso 1 1 calc GR . . . .
 C15 C 0.0999(9) 0.4986(3) 0.6689(3) 0.0406(16) Uani 1 1 d . . . . .
 H15A H -0.021203 0.505283 0.691018 0.061 Uiso 1 1 calc GR . . . .
 H15B H 0.156403 0.549614 0.660480 0.061 Uiso 1 1 calc GR . . . .
 H15C H 0.189069 0.467929 0.693742 0.061 Uiso 1 1 calc GR . . . .
 C16 C 0.0298(10) 0.3307(3) 0.6616(3) 0.0484(18) Uani 1 1 d . . . . .
 H16A H -0.057672 0.286365 0.665532 0.073 Uiso 1 1 calc GR . . . .
 H16B H 0.045272 0.355758 0.701432 0.073 Uiso 1 1 calc GR . . . .
 H16C H 0.155034 0.312532 0.647074 0.073 Uiso 1 1 calc GR . . . .
 C17 C 0.2401(8) 0.7320(3) 0.3971(3) 0.0294(13) Uani 1 1 d . . . . .
 C18 C 0.1654(8) 0.7445(3) 0.3321(3) 0.0313(13) Uani 1 1 d . . . . .
 C19 C 0.0273(8) 0.6782(3) 0.3166(3) 0.0328(14) Uani 1 1 d . . . . .
 C20 C -0.0803(8) 0.6422(3) 0.3623(3) 0.0371(15) Uani 1 1 d . . . . .
 H20 H -0.073568 0.661407 0.402806 0.045 Uiso 1 1 calc R . . . .
 C21 C -0.1965(9) 0.5791(4) 0.3497(3) 0.0445(17) Uani 1 1 d . . . . .
 H21 H -0.265784 0.554277 0.381479 0.053 Uiso 1 1 calc R . . . .
 C22 C -0.2107(9) 0.5529(4) 0.2914(4) 0.055(2) Uani 1 1 d . . . . .
 H22 H -0.290302 0.509475 0.282521 0.066 Uiso 1 1 calc R . . . .
 C23 C -0.1104(10) 0.5889(4) 0.2448(3) 0.059(2) Uani 1 1 d . . . . .
 H23 H -0.122570 0.570727 0.204113 0.071 Uiso 1 1 calc R . . . .
 C24 C 0.0089(9) 0.6520(4) 0.2579(3) 0.0472(17) Uani 1 1 d . . . . .
 H24 H 0.077585 0.676791 0.225985 0.057 Uiso 1 1 calc R . . . .
 C25 C 0.4886(9) 0.7839(4) 0.3013(3) 0.0511(19) Uani 1 1 d . . . . .
 H25A H 0.598531 0.751215 0.290250 0.077 Uiso 1 1 calc GR . . . .
 H25B H 0.493564 0.795773 0.344899 0.077 Uiso 1 1 calc GR . . . .
 H25C H 0.493277 0.832351 0.277862 0.077 Uiso 1 1 calc GR . . . .
 C26 C 0.0573(10) 0.8230(4) 0.3273(3) 0.0446(17) Uani 1 1 d . . . . .

loop_
  _atom_site_aniso_label
  _atom_site_aniso_U_11
  _atom_site_aniso_U_22
  _atom_site_aniso_U_33
  _atom_site_aniso_U_23
  _atom_site_aniso_U_13
  _atom_site_aniso_U_12
 F1 0.100(3) 0.058(2) 0.050(3) 0.007(2) -0.030(2) 0.013(3)
 F2 0.068(3) 0.0349(19) 0.065(3) 0.0007(19) -0.013(2) -0.002(2)
 F3 0.042(2) 0.059(2) 0.076(3) -0.009(2) -0.005(2) 0.019(2)
 O1W 0.036(2) 0.033(2) 0.054(3) -0.007(2) -0.009(2) 0.0047(19)
 O1 0.026(2) 0.0292(19) 0.043(3) -0.0001(19) -0.004(2) -0.0010(17)
 O2 0.035(2) 0.025(2) 0.051(3) -0.001(2) -0.001(2) -0.0017(18)
 O3 0.039(2) 0.031(2) 0.032(3) 0.0057(18) -0.0026(19) -0.0024(18)
 O4 0.030(2) 0.033(2) 0.028(2) -0.0027(18) 0.0022(17) 0.0013(18)
 O5 0.045(2) 0.034(2) 0.032(2) -0.0086(19) 0.003(2) 0.002(2)
 O6 0.039(2) 0.051(3) 0.032(2) -0.005(2) 0.004(2) -0.009(2)
 C1 0.029(3) 0.032(3) 0.025(3) 0.000(3) -0.007(3) 0.003(3)
 C2 0.028(3) 0.034(3) 0.027(3) -0.002(3) -0.002(2) 0.004(3)
 C3 0.034(3) 0.037(3) 0.034(4) 0.000(3) -0.005(3) -0.002(3)
 C4 0.036(3) 0.031(3) 0.030(4) -0.005(3) 0.000(3) -0.003(3)
 C5 0.027(3) 0.029(3) 0.031(4) 0.002(3) -0.004(3) -0.002(3)
 C6 0.026(3) 0.031(3) 0.035(4) 0.004(3) -0.005(3) 0.003(3)
 C7 0.033(3) 0.031(3) 0.030(3) 0.005(3) -0.006(3) 0.005(3)
 C8 0.037(3) 0.030(3) 0.028(4) -0.002(3) -0.003(3) -0.005(3)
 C9 0.035(3) 0.031(3) 0.034(4) 0.001(3) 0.003(3) 0.006(3)
 C10 0.033(3) 0.037(3) 0.036(4) -0.003(3) 0.001(3) 0.008(3)
 C11 0.046(4) 0.030(3) 0.024(3) 0.003(3) -0.006(3) 0.002(3)
 C12 0.041(3) 0.035(3) 0.027(3) 0.002(3) -0.012(3) 0.001(3)
 C13 0.055(4) 0.041(3) 0.032(4) -0.007(3) -0.009(3) -0.004(3)
 C14 0.047(4) 0.046(4) 0.041(4) -0.005(3) 0.004(3) 0.004(3)
 C15 0.052(4) 0.041(3) 0.028(4) -0.002(3) 0.001(3) -0.002(3)
 C16 0.067(5) 0.030(3) 0.048(4) 0.011(3) -0.006(4) -0.001(3)
 C17 0.026(3) 0.030(3) 0.033(3) -0.003(3) 0.001(3) -0.008(3)
 C18 0.033(3) 0.036(3) 0.026(3) 0.000(3) -0.001(3) -0.002(3)
 C19 0.028(3) 0.036(3) 0.034(4) -0.007(3) -0.002(3) 0.005(3)
 C20 0.030(3) 0.043(3) 0.038(4) -0.004(3) 0.000(3) 0.004(3)
 C21 0.031(4) 0.052(4) 0.051(5) -0.001(3) 0.000(3) -0.009(3)
 C22 0.040(4) 0.066(5) 0.058(5) -0.007(4) -0.001(4) -0.022(4)
 C23 0.057(5) 0.077(5) 0.043(5) -0.027(4) 0.003(4) -0.020(4)
 C24 0.041(4) 0.062(4) 0.038(4) -0.008(3) 0.002(3) -0.008(4)
 C25 0.048(4) 0.065(4) 0.040(4) -0.004(4) 0.001(3) -0.028(4)
 C26 0.058(5) 0.041(4) 0.035(4) -0.001(3) -0.008(3) 0.008(4)

_geom_special_details
;
 All esds (except the esd in the dihedral angle between two l.s. planes)
 are estimated using the full covariance matrix.  The cell esds are taken
 into account individually in the estimation of esds in distances, angles
 and torsion angles; correlations between esds in cell parameters are only
 used when they are defined by crystal symmetry.  An approximate (isotropic)
 treatment of cell esds is used for estimating esds involving l.s. planes.
;
loop_
  _geom_bond_atom_site_label_1
  _geom_bond_atom_site_label_2
  _geom_bond_distance
  _geom_bond_site_symmetry_2
  _geom_bond_publ_flag
 F1 C26 1.336(7) . ?
 F2 C26 1.338(7) . ?
 F3 C26 1.333(7) . ?
 O1W H1WA 0.8399 . ?
 O1W H1WB 0.8400 . ?
 O1 H1 0.8401 . ?
 O1 C5 1.441(6) . ?
 O2 H2 0.8401 . ?
 O2 C6 1.443(6) . ?
 O3 C8 1.455(6) . ?
 O3 C16 1.428(6) . ?
 O4 C12 1.472(6) . ?
 O4 C17 1.336(6) . ?
 O5 C17 1.202(6) . ?
 O6 C18 1.419(6) . ?
 O6 C25 1.436(7) . ?
 C1 C2 1.498(7) . ?
 C1 C11 1.326(8) . ?
 C1 C12 1.500(7) . ?
 C2 H2A 1.0000 . ?
 C2 C3 1.552(7) . ?
 C2 C5 1.555(7) . ?
 C3 H3A 0.9900 . ?
 C3 H3B 0.9900 . ?
 C3 C4 1.556(7) . ?
 C4 C5 1.575(8) . ?
 C4 C13 1.518(7) . ?
 C4 C14 1.529(8) . ?
 C5 C6 1.509(7) . ?
 C6 H6 1.0000 . ?
 C6 C7 1.556(7) . ?
 C7 H7A 0.9900 . ?
 C7 H7B 0.9900 . ?
 C7 C8 1.530(8) . ?
 C8 C9 1.507(7) . ?
 C8 C15 1.541(7) . ?
 C9 H9 0.9500 . ?
 C9 C10 1.330(7) . ?
 C10 H10 0.9500 . ?
 C10 C11 1.485(8) . ?
 C11 H11 0.9500 . ?
 C12 H12A 0.9900 . ?
 C12 H12B 0.9900 . ?
 C13 H13A 0.9800 . ?
 C13 H13B 0.9800 . ?
 C13 H13C 0.9800 . ?
 C14 H14A 0.9800 . ?
 C14 H14B 0.9800 . ?
 C14 H14C 0.9800 . ?
 C15 H15A 0.9800 . ?
 C15 H15B 0.9800 . ?
 C15 H15C 0.9800 . ?
 C16 H16A 0.9800 . ?
 C16 H16B 0.9800 . ?
 C16 H16C 0.9800 . ?
 C17 C18 1.534(7) . ?
 C18 C19 1.530(8) . ?
 C18 C26 1.550(8) . ?
 C19 C20 1.397(8) . ?
 C19 C24 1.372(8) . ?
 C20 H20 0.9500 . ?
 C20 C21 1.381(8) . ?
 C21 H21 0.9500 . ?
 C21 C22 1.361(9) . ?
 C22 H22 0.9500 . ?
 C22 C23 1.384(9) . ?
 C23 H23 0.9500 . ?
 C23 C24 1.397(9) . ?
 C24 H24 0.9500 . ?
 C25 H25A 0.9800 . ?
 C25 H25B 0.9800 . ?
 C25 H25C 0.9800 . ?

loop_
  _geom_angle_atom_site_label_1
  _geom_angle_atom_site_label_2
  _geom_angle_atom_site_label_3
  _geom_angle
  _geom_angle_site_symmetry_1
  _geom_angle_site_symmetry_3
  _geom_angle_publ_flag
 H1WA O1W H1WB 110.8 . . ?
 C5 O1 H1 105.2 . . ?
 C6 O2 H2 97.5 . . ?
 C16 O3 C8 117.3(4) . . ?
 C17 O4 C12 115.8(4) . . ?
 C18 O6 C25 118.0(5) . . ?
 C2 C1 C12 118.6(5) . . ?
 C11 C1 C2 121.7(5) . . ?
 C11 C1 C12 119.6(5) . . ?
 C1 C2 H2A 107.6 . . ?
 C1 C2 C3 124.7(5) . . ?
 C1 C2 C5 119.1(5) . . ?
 C3 C2 H2A 107.6 . . ?
 C3 C2 C5 88.2(4) . . ?
 C5 C2 H2A 107.6 . . ?
 C2 C3 H3A 113.8 . . ?
 C2 C3 H3B 113.8 . . ?
 C2 C3 C4 88.9(4) . . ?
 H3A C3 H3B 111.1 . . ?
 C4 C3 H3A 113.8 . . ?
 C4 C3 H3B 113.8 . . ?
 C3 C4 C5 87.4(4) . . ?
 C13 C4 C3 111.0(5) . . ?
 C13 C4 C5 113.0(5) . . ?
 C13 C4 C14 111.0(5) . . ?
 C14 C4 C3 116.1(5) . . ?
 C14 C4 C5 116.4(5) . . ?
 O1 C5 C2 107.1(4) . . ?
 O1 C5 C4 110.1(5) . . ?
 O1 C5 C6 111.7(5) . . ?
 C2 C5 C4 88.1(4) . . ?
 C6 C5 C2 115.9(4) . . ?
 C6 C5 C4 121.3(5) . . ?
 O2 C6 C5 112.7(5) . . ?
 O2 C6 H6 107.4 . . ?
 O2 C6 C7 111.0(4) . . ?
 C5 C6 H6 107.4 . . ?
 C5 C6 C7 110.6(4) . . ?
 C7 C6 H6 107.4 . . ?
 C6 C7 H7A 108.1 . . ?
 C6 C7 H7B 108.1 . . ?
 H7A C7 H7B 107.3 . . ?
 C8 C7 C6 116.7(5) . . ?
 C8 C7 H7A 108.1 . . ?
 C8 C7 H7B 108.1 . . ?
 O3 C8 C7 111.0(4) . . ?
 O3 C8 C9 101.7(4) . . ?
 O3 C8 C15 110.3(5) . . ?
 C7 C8 C15 108.8(5) . . ?
 C9 C8 C7 117.0(5) . . ?
 C9 C8 C15 107.7(5) . . ?
 C8 C9 H9 114.7 . . ?
 C10 C9 C8 130.7(6) . . ?
 C10 C9 H9 114.7 . . ?
 C9 C10 H10 114.5 . . ?
 C9 C10 C11 131.1(6) . . ?
 C11 C10 H10 114.5 . . ?
 C1 C11 C10 125.4(5) . . ?
 C1 C11 H11 117.3 . . ?
 C10 C11 H11 117.3 . . ?
 O4 C12 C1 108.9(4) . . ?
 O4 C12 H12A 109.9 . . ?
 O4 C12 H12B 109.9 . . ?
 C1 C12 H12A 109.9 . . ?
 C1 C12 H12B 109.9 . . ?
 H12A C12 H12B 108.3 . . ?
 C4 C13 H13A 109.5 . . ?
 C4 C13 H13B 109.5 . . ?
 C4 C13 H13C 109.5 . . ?
 H13A C13 H13B 109.5 . . ?
 H13A C13 H13C 109.5 . . ?
 H13B C13 H13C 109.5 . . ?
 C4 C14 H14A 109.5 . . ?
 C4 C14 H14B 109.5 . . ?
 C4 C14 H14C 109.5 . . ?
 H14A C14 H14B 109.5 . . ?
 H14A C14 H14C 109.5 . . ?
 H14B C14 H14C 109.5 . . ?
 C8 C15 H15A 109.5 . . ?
 C8 C15 H15B 109.5 . . ?
 C8 C15 H15C 109.5 . . ?
 H15A C15 H15B 109.5 . . ?
 H15A C15 H15C 109.5 . . ?
 H15B C15 H15C 109.5 . . ?
 O3 C16 H16A 109.5 . . ?
 O3 C16 H16B 109.5 . . ?
 O3 C16 H16C 109.5 . . ?
 H16A C16 H16B 109.5 . . ?
 H16A C16 H16C 109.5 . . ?
 H16B C16 H16C 109.5 . . ?
 O4 C17 C18 109.8(5) . . ?
 O5 C17 O4 125.7(6) . . ?
 O5 C17 C18 124.4(5) . . ?
 O6 C18 C17 113.0(5) . . ?
 O6 C18 C19 107.1(4) . . ?
 O6 C18 C26 108.6(5) . . ?
 C17 C18 C26 110.5(5) . . ?
 C19 C18 C17 108.4(5) . . ?
 C19 C18 C26 109.2(5) . . ?
 C20 C19 C18 120.6(5) . . ?
 C24 C19 C18 120.9(6) . . ?
 C24 C19 C20 118.5(6) . . ?
 C19 C20 H20 119.3 . . ?
 C21 C20 C19 121.3(6) . . ?
 C21 C20 H20 119.3 . . ?
 C20 C21 H21 120.3 . . ?
 C22 C21 C20 119.4(6) . . ?
 C22 C21 H21 120.3 . . ?
 C21 C22 H22 119.7 . . ?
 C21 C22 C23 120.6(6) . . ?
 C23 C22 H22 119.7 . . ?
 C22 C23 H23 120.1 . . ?
 C22 C23 C24 119.7(6) . . ?
 C24 C23 H23 120.1 . . ?
 C19 C24 C23 120.3(6) . . ?
 C19 C24 H24 119.8 . . ?
 C23 C24 H24 119.8 . . ?
 O6 C25 H25A 109.5 . . ?
 O6 C25 H25B 109.5 . . ?
 O6 C25 H25C 109.5 . . ?
 H25A C25 H25B 109.5 . . ?
 H25A C25 H25C 109.5 . . ?
 H25B C25 H25C 109.5 . . ?
 F1 C26 F2 107.0(5) . . ?
 F1 C26 C18 109.9(5) . . ?
 F2 C26 C18 112.9(5) . . ?
 F3 C26 F1 107.2(6) . . ?
 F3 C26 F2 107.5(5) . . ?
 F3 C26 C18 112.1(5) . . ?

loop_
  _geom_hbond_atom_site_label_D
  _geom_hbond_atom_site_label_H
  _geom_hbond_atom_site_label_A
  _geom_hbond_distance_DH
  _geom_hbond_distance_HA
  _geom_hbond_distance_DA
  _geom_hbond_angle_DHA
  _geom_hbond_site_symmetry_A
 O1 H1 O1W 0.84 2.07 2.910(5) 179.3 .
 O2 H2 O1W 0.84 1.97 2.762(5) 156.8 .
 O2 H2 O1 0.84 2.60 3.042(5) 114.1 .

loop_
  _geom_torsion_atom_site_label_1
  _geom_torsion_atom_site_label_2
  _geom_torsion_atom_site_label_3
  _geom_torsion_atom_site_label_4
  _geom_torsion
  _geom_torsion_site_symmetry_1
  _geom_torsion_site_symmetry_2
  _geom_torsion_site_symmetry_3
  _geom_torsion_site_symmetry_4
  _geom_torsion_publ_flag
 O1 C5 C6 O2 -72.7(6) . . . . ?
 O1 C5 C6 C7 52.2(6) . . . . ?
 O2 C6 C7 C8 -114.7(5) . . . . ?
 O3 C8 C9 C10 -165.9(6) . . . . ?
 O4 C17 C18 O6 -47.1(6) . . . . ?
 O4 C17 C18 C19 71.5(5) . . . . ?
 O4 C17 C18 C26 -168.9(4) . . . . ?
 O5 C17 C18 O6 135.4(5) . . . . ?
 O5 C17 C18 C19 -106.0(6) . . . . ?
 O5 C17 C18 C26 13.6(8) . . . . ?
 O6 C18 C19 C20 152.0(5) . . . . ?
 O6 C18 C19 C24 -26.8(7) . . . . ?
 O6 C18 C26 F1 53.2(7) . . . . ?
 O6 C18 C26 F2 -66.2(6) . . . . ?
 O6 C18 C26 F3 172.2(5) . . . . ?
 C1 C2 C3 C4 145.3(5) . . . . ?
 C1 C2 C5 O1 -39.1(7) . . . . ?
 C1 C2 C5 C4 -149.6(5) . . . . ?
 C1 C2 C5 C6 86.2(6) . . . . ?
 C2 C1 C11 C10 -4.9(9) . . . . ?
 C2 C1 C12 O4 69.6(6) . . . . ?
 C2 C3 C4 C5 -20.2(4) . . . . ?
 C2 C3 C4 C13 93.4(5) . . . . ?
 C2 C3 C4 C14 -138.5(5) . . . . ?
 C2 C5 C6 O2 164.4(4) . . . . ?
 C2 C5 C6 C7 -70.7(6) . . . . ?
 C3 C2 C5 O1 90.3(5) . . . . ?
 C3 C2 C5 C4 -20.2(4) . . . . ?
 C3 C2 C5 C6 -144.4(5) . . . . ?
 C3 C4 C5 O1 -87.3(5) . . . . ?
 C3 C4 C5 C2 20.2(4) . . . . ?
 C3 C4 C5 C6 139.6(5) . . . . ?
 C4 C5 C6 O2 59.8(7) . . . . ?
 C4 C5 C6 C7 -175.3(5) . . . . ?
 C5 C2 C3 C4 20.5(4) . . . . ?
 C5 C6 C7 C8 119.5(5) . . . . ?
 C6 C7 C8 O3 56.6(6) . . . . ?
 C6 C7 C8 C9 -59.5(6) . . . . ?
 C6 C7 C8 C15 178.2(5) . . . . ?
 C7 C8 C9 C10 -44.8(8) . . . . ?
 C8 C9 C10 C11 7.8(11) . . . . ?
 C9 C10 C11 C1 76.0(9) . . . . ?
 C11 C1 C2 C3 152.9(5) . . . . ?
 C11 C1 C2 C5 -97.0(7) . . . . ?
 C11 C1 C12 O4 -108.1(6) . . . . ?
 C12 O4 C17 O5 13.3(7) . . . . ?
 C12 O4 C17 C18 -164.2(4) . . . . ?
 C12 C1 C2 C3 -24.8(8) . . . . ?
 C12 C1 C2 C5 85.2(6) . . . . ?
 C12 C1 C11 C10 172.8(5) . . . . ?
 C13 C4 C5 O1 160.9(4) . . . . ?
 C13 C4 C5 C2 -91.6(5) . . . . ?
 C13 C4 C5 C6 27.8(7) . . . . ?
 C14 C4 C5 O1 30.7(6) . . . . ?
 C14 C4 C5 C2 138.2(5) . . . . ?
 C14 C4 C5 C6 -102.4(6) . . . . ?
 C15 C8 C9 C10 78.1(8) . . . . ?
 C16 O3 C8 C7 65.4(6) . . . . ?
 C16 O3 C8 C9 -169.3(5) . . . . ?
 C16 O3 C8 C15 -55.3(6) . . . . ?
 C17 O4 C12 C1 80.4(6) . . . . ?
 C17 C18 C19 C20 29.9(7) . . . . ?
 C17 C18 C19 C24 -149.0(6) . . . . ?
 C17 C18 C26 F1 177.6(5) . . . . ?
 C17 C18 C26 F2 58.2(7) . . . . ?
 C17 C18 C26 F3 -63.4(6) . . . . ?
 C18 C19 C20 C21 -175.9(5) . . . . ?
 C18 C19 C24 C23 176.8(6) . . . . ?
 C19 C18 C26 F1 -63.3(7) . . . . ?
 C19 C18 C26 F2 177.3(5) . . . . ?
 C19 C18 C26 F3 55.7(7) . . . . ?
 C19 C20 C21 C22 -1.9(10) . . . . ?
 C20 C19 C24 C23 -2.1(9) . . . . ?
 C20 C21 C22 C23 -0.1(11) . . . . ?
 C21 C22 C23 C24 1.0(12) . . . . ?
 C22 C23 C24 C19 0.2(11) . . . . ?
 C24 C19 C20 C21 3.0(9) . . . . ?
 C25 O6 C18 C17 -43.0(7) . . . . ?
 C25 O6 C18 C19 -162.2(5) . . . . ?
 C25 O6 C18 C26 79.9(6) . . . . ?
 C26 C18 C19 C20 -90.5(6) . . . . ?
 C26 C18 C19 C24 90.7(7) . . . . ?

_shelx_res_file
;
TITL sa651 in P2(1)2(1)2(1)
    sa651.res
    created by SHELXL-2016/6 at 08:01:28 on 16-Aug-2017
CELL 0.71073 6.9639 17.2105 21.9478 90 90 90
ZERR 4 0.0014 0.0034 0.0046 0 0 0
LATT -1
SYMM 0.5-X,-Y,0.5+Z
SYMM -X,0.5+Y,0.5-Z
SYMM 0.5+X,0.5-Y,-Z
SFAC C H O F
UNIT 104 140 28 12

L.S. 5
PLAN  20
SIZE 0.27 0.9 0.08
TEMP -100
HTAB O1 O1W
HTAB O2 O1W
HTAB O2 O1
BOND $H
CONF
fmap 2
acta
OMIT 0 1 1
OMIT 0 0 2
OMIT 0 2 1
OMIT 0 1 2
REM <olex2.extras>
REM <HklSrc "%.\\sa651.hkl">
REM </olex2.extras>

WGHT    0.018100    1.905600
FVAR       3.53753
F1    4   -0.000391    0.834536    0.269960    11.00000    0.09977    0.05788 =
         0.05023    0.00669   -0.03025    0.01310
F2    4    0.166348    0.883855    0.342737    11.00000    0.06844    0.03486 =
         0.06541    0.00069   -0.01307   -0.00153
F3    4   -0.098947    0.824583    0.362341    11.00000    0.04187    0.05893 =
         0.07625   -0.00862   -0.00464    0.01923
O1W   3    0.728008    0.328648    0.522387    11.00000    0.03590    0.03273 =
         0.05407   -0.00667   -0.00938    0.00465
AFIX   3
H1WA  2    0.774067    0.287158    0.508517    11.00000   -1.20000
H1WB  2    0.795258    0.345518    0.551277    11.00000   -1.20000
AFIX   0

O1    3    0.523592    0.466669    0.481704    11.00000    0.02645    0.02924 =
         0.04339   -0.00014   -0.00386   -0.00097
AFIX   3
H1    2    0.582851    0.427009    0.493714    11.00000   -1.20000
AFIX   0
O2    3    0.332576    0.316613    0.522761    11.00000    0.03483    0.02548 =
         0.05104   -0.00105   -0.00139   -0.00169
AFIX   3
H2    2    0.445956    0.331544    0.528591    11.00000   -1.20000
AFIX   0
O3    3   -0.047722    0.385211    0.619222    11.00000    0.03851    0.03118 =
         0.03247    0.00574   -0.00258   -0.00237
O4    3    0.361262    0.671846    0.398235    11.00000    0.03006    0.03290 =
         0.02805   -0.00265    0.00225    0.00129
O5    3    0.190230    0.769490    0.440590    11.00000    0.04468    0.03420 =
         0.03243   -0.00856    0.00271    0.00249
O6    3    0.313554    0.743346    0.287733    11.00000    0.03885    0.05122 =
         0.03206   -0.00472    0.00380   -0.00908
C1    1    0.242618    0.587210    0.477692    11.00000    0.02921    0.03189 =
         0.02548   -0.00044   -0.00676    0.00254
C2    1    0.217116    0.511665    0.444795    11.00000    0.02771    0.03415 =
         0.02690   -0.00179   -0.00238    0.00411
AFIX  13
H2A   2    0.077905    0.497656    0.446849    11.00000   -1.20000
AFIX   0
C3    1    0.287056    0.495338    0.378868    11.00000    0.03436    0.03670 =
         0.03360   -0.00035   -0.00536   -0.00202
AFIX  23
H3A   2    0.402342    0.525430    0.367046    11.00000   -1.20000
H3B   2    0.184930    0.499980    0.347701    11.00000   -1.20000
AFIX   0
C4    1    0.331073    0.410127    0.397998    11.00000    0.03612    0.03117 =
         0.03033   -0.00527   -0.00041   -0.00337
C5    1    0.334208    0.439591    0.465932    11.00000    0.02666    0.02930 =
         0.03138    0.00174   -0.00428   -0.00202
C6    1    0.245996    0.392371    0.516627    11.00000    0.02623    0.03139 =
         0.03500    0.00352   -0.00482    0.00316
AFIX  13
H6    2    0.107549    0.384364    0.506292    11.00000   -1.20000
AFIX   0
C7    1    0.253958    0.437837    0.577850    11.00000    0.03274    0.03103 =
         0.03026    0.00500   -0.00600    0.00500
AFIX  23
H7A   2    0.332761    0.407521    0.606908    11.00000   -1.20000
H7B   2    0.321474    0.487583    0.570496    11.00000   -1.20000
AFIX   0
C8    1    0.061492    0.455958    0.608358    11.00000    0.03662    0.02956 =
         0.02760   -0.00182   -0.00254   -0.00452
C9    1   -0.079847    0.503872    0.572432    11.00000    0.03483    0.03089 =
         0.03382    0.00118    0.00290    0.00622
AFIX  43
H9    2   -0.208146    0.485152    0.573376    11.00000   -1.20000
AFIX   0
C10   1   -0.054686    0.568035    0.539621    11.00000    0.03277    0.03718 =
         0.03640   -0.00322    0.00150    0.00838
AFIX  43
H10   2   -0.170194    0.591235    0.525502    11.00000   -1.20000
AFIX   0
C11   1    0.122887    0.609635    0.521264    11.00000    0.04600    0.02999 =
         0.02444    0.00253   -0.00640    0.00155
AFIX  43
H11   2    0.153248    0.656154    0.542480    11.00000   -1.20000
AFIX   0
C12   1    0.403975    0.639706    0.458912    11.00000    0.04066    0.03488 =
         0.02743    0.00218   -0.01182    0.00082
AFIX  23
H12A  2    0.418270    0.682409    0.488792    11.00000   -1.20000
H12B  2    0.525852    0.610139    0.457629    11.00000   -1.20000
AFIX   0
C13   1    0.161889    0.357267    0.384357    11.00000    0.05477    0.04105 =
         0.03230   -0.00727   -0.00939   -0.00405
AFIX 137
H13A  2    0.181799    0.306855    0.404134    11.00000   -1.50000
H13B  2    0.150956    0.349841    0.340223    11.00000   -1.50000
H13C  2    0.043716    0.380987    0.399908    11.00000   -1.50000
AFIX   0
C14   1    0.518198    0.375541    0.373629    11.00000    0.04682    0.04587 =
         0.04078   -0.00549    0.00444    0.00354
AFIX 137
H14A  2    0.544478    0.326264    0.394393    11.00000   -1.50000
H14B  2    0.623965    0.411859    0.381143    11.00000   -1.50000
H14C  2    0.506070    0.366334    0.329733    11.00000   -1.50000
AFIX   0
C15   1    0.099941    0.498577    0.668914    11.00000    0.05198    0.04142 =
         0.02842   -0.00194    0.00118   -0.00200
AFIX 137
H15A  2   -0.021203    0.505283    0.691018    11.00000   -1.50000
H15B  2    0.156403    0.549614    0.660480    11.00000   -1.50000
H15C  2    0.189069    0.467929    0.693742    11.00000   -1.50000
AFIX   0
C16   1    0.029807    0.330692    0.661641    11.00000    0.06683    0.02998 =
         0.04838    0.01078   -0.00602   -0.00105
AFIX 137
H16A  2   -0.057672    0.286365    0.665532    11.00000   -1.50000
H16B  2    0.045272    0.355758    0.701432    11.00000   -1.50000
H16C  2    0.155034    0.312532    0.647074    11.00000   -1.50000
AFIX   0
C17   1    0.240065    0.732038    0.397127    11.00000    0.02580    0.02966 =
         0.03278   -0.00343    0.00102   -0.00848
C18   1    0.165404    0.744489    0.332101    11.00000    0.03269    0.03551 =
         0.02566   -0.00014   -0.00103   -0.00225
C19   1    0.027325    0.678246    0.316646    11.00000    0.02831    0.03572 =
         0.03423   -0.00691   -0.00180    0.00457
C20   1   -0.080338    0.642183    0.362288    11.00000    0.03048    0.04296 =
         0.03795   -0.00373    0.00009    0.00402
AFIX  43
H20   2   -0.073568    0.661407    0.402806    11.00000   -1.20000
AFIX   0
C21   1   -0.196466    0.579121    0.349695    11.00000    0.03079    0.05159 =
         0.05099   -0.00081    0.00017   -0.00942
AFIX  43
H21   2   -0.265784    0.554277    0.381479    11.00000   -1.20000
AFIX   0
C22   1   -0.210747    0.552876    0.291360    11.00000    0.03968    0.06599 =
         0.05844   -0.00711   -0.00126   -0.02183
AFIX  43
H22   2   -0.290302    0.509475    0.282521    11.00000   -1.20000
AFIX   0
C23   1   -0.110390    0.588862    0.244811    11.00000    0.05731    0.07652 =
         0.04315   -0.02666    0.00316   -0.01997
AFIX  43
H23   2   -0.122570    0.570727    0.204113    11.00000   -1.20000
AFIX   0
C24   1    0.008884    0.651956    0.257909    11.00000    0.04144    0.06240 =
         0.03777   -0.00794    0.00200   -0.00840
AFIX  43
H24   2    0.077585    0.676791    0.225985    11.00000   -1.20000
AFIX   0
C25   1    0.488625    0.783889    0.301260    11.00000    0.04819    0.06523 =
         0.03981   -0.00383    0.00086   -0.02751
AFIX 137
H25A  2    0.598531    0.751215    0.290250    11.00000   -1.50000
H25B  2    0.493564    0.795773    0.344899    11.00000   -1.50000
H25C  2    0.493277    0.832351    0.277862    11.00000   -1.50000
AFIX   0
C26   1    0.057302    0.822959    0.327306    11.00000    0.05788    0.04059 =
         0.03537   -0.00124   -0.00836    0.00785
HKLF 4


REM  sa651 in P2(1)2(1)2(1)
REM R1 =  0.0811 for    4150 Fo > 4sig(Fo)  and  0.0948 for all    4799 data
REM    330 parameters refined using      0 restraints

END

WGHT      0.0182      1.9014

REM Highest difference peak  0.171,  deepest hole -0.179,  1-sigma level  0.046
Q1    1   0.2148  0.5683  0.5230  11.00000  0.05    0.17
Q2    1   0.2452  0.7223  0.2475  11.00000  0.05    0.17
Q3    1   0.4218  0.3298  0.4779  11.00000  0.05    0.16
Q4    1   0.2916  0.7988  0.2851  11.00000  0.05    0.16
Q5    1  -0.0205  0.4817  0.3995  11.00000  0.05    0.16
Q6    1   0.1369  0.6160  0.4820  11.00000  0.05    0.16
Q7    1   0.3946  0.3071  0.5770  11.00000  0.05    0.16
Q8    1   0.3475  0.7338  0.3283  11.00000  0.05    0.16
Q9    1  -0.2918  0.3994  0.2763  11.00000  0.05    0.16
Q10   1  -0.2236  0.4636  0.6019  11.00000  0.05    0.16
Q11   1   0.1860  0.7799  0.4896  11.00000  0.05    0.16
Q12   1   0.0161  0.8625  0.2197  11.00000  0.05    0.15
Q13   1  -0.0429  0.6992  0.3826  11.00000  0.05    0.15
Q14   1   0.5925  0.8934  0.2572  11.00000  0.05    0.15
Q15   1   0.5361  0.6768  0.2814  11.00000  0.05    0.15
Q16   1  -0.1686  0.6410  0.5240  11.00000  0.05    0.15
Q17   1  -0.0532  0.6376  0.4190  11.00000  0.05    0.15
Q18   1  -0.0754  0.4922  0.4813  11.00000  0.05    0.15
Q19   1  -0.1900  0.3913  0.6187  11.00000  0.05    0.15
Q20   1  -0.0071  0.4587  0.5625  11.00000  0.05    0.15
;
_shelx_res_checksum               18180
_shelx_hkl_file
;
   0   0  -1  -16.04   13.35   1 0.55983-0.55983-0.82844 0.82844-0.01622-0.01622
   0   0   1   -8.98   11.71   1 0.55219-0.55219-0.83355 0.83355 0.01622 0.01622
   0   0  -2   31.88   35.16   1 0.56341-0.56341-0.82553 0.82553-0.03244-0.03244
   0   0   2   -0.67   53.88   1 0.54813-0.54813-0.83575 0.83575 0.03244 0.03244
   0   0  -3  207.85  120.92   1 0.56691-0.56691-0.82234 0.82234-0.04866-0.04866
   0   0   3  245.82  114.66   1 0.54392-0.54392-0.83772 0.83772 0.04866 0.04866
   0   0  -422291.67  492.91   1 0.57017-0.57017-0.81895 0.81895-0.06488-0.06488
   0   0   420389.15 1049.30   1 0.53955-0.53955-0.83944 0.83944 0.06488 0.06488
   0   0  -5  112.48  219.63   1 0.57327-0.57327-0.81534 0.81534-0.08110-0.08110
   0   0   5  -60.61  177.56   1 0.53502-0.53502-0.84093 0.84093 0.08111 0.08111
   0   0  -667959.52 1302.59   1 0.57621-0.57621-0.81148 0.81148-0.09732-0.09732
   0   0   660625.55 1140.42   1 0.53033-0.53033-0.84218 0.84218 0.09733 0.09733
   0   0  -665204.81 1240.50   1 0.51416-0.51416 0.85214-0.85214-0.09734-0.09734
   0   0  -7  362.15  262.81   1 0.57899-0.57899-0.80738 0.80738-0.11354-0.11354
   0   0   7  171.13   86.10   1 0.52548-0.52548-0.84319 0.84319 0.11355 0.11355
   0   0  -7  408.55  139.22   1 0.51813-0.51813 0.84772-0.84772-0.11356-0.11356
   0   0  -873321.39 1416.26   1 0.58162-0.58162-0.80304 0.80304-0.12976-0.12976
   0   0   867767.96 1344.10   1 0.52047-0.52047-0.84395 0.84395 0.12977 0.12977
   0   0  -872337.42 1384.97   1 0.52195-0.52195 0.84303-0.84303-0.12978-0.12978
   0   0  -9  401.83  389.54   1 0.58407-0.58407-0.79846 0.79846-0.14598-0.14598
   0   0   9 -165.38  190.20   1 0.51529-0.51529-0.84448 0.84448 0.14600 0.14600
   0   0  -9  -52.61  202.35   1 0.52563-0.52563 0.83808-0.83808-0.14601-0.14601
   0   0 -10 2101.42  328.29   1 0.58637-0.58637-0.79363 0.79363-0.16220-0.16220
   0   0  10 2241.51  402.48   1 0.50996-0.50996-0.84476 0.84476 0.16222 0.16222
   0   0 -10 2322.53  467.12   1 0.52915-0.52915 0.83287-0.83287-0.16223-0.16223
   0   0 -11  478.54  297.50   1 0.58850-0.58850-0.78855 0.78855-0.17842-0.17842
   0   0  11  744.94  198.95   1 0.50445-0.50445-0.84479 0.84479 0.17844 0.17844
   0   0 -11  121.80   99.23   1 0.53252-0.53252 0.82738-0.82738-0.17845-0.17845
   0   0 -12 9151.66  584.83   1 0.59047-0.59047-0.78323 0.78323-0.19464-0.19464
   0   0 -13  383.95  277.50   1 0.59226-0.59226-0.77766 0.77766-0.21086-0.21086
   0   0 -1428100.29  979.50   1 0.59389-0.59389-0.77183 0.77183-0.22708-0.22708
   0   0 -15  694.63  332.37   1 0.59534-0.59534-0.76574 0.76574-0.24330-0.24330
   0   0 -16 9769.62 1216.35   1 0.59662-0.59662-0.75939 0.75939-0.25952-0.25952
   0   0 -17 -107.29  322.77   1 0.59772-0.59772-0.75278 0.75278-0.27574-0.27574
   0   0 -18 1987.02  593.35   1 0.59838-0.59838-0.74616 0.74616-0.29185-0.29185
   0   0 -19  604.81  398.27   1 0.59913-0.59913-0.73901 0.73901-0.30806-0.30806
   0   0 -20 5479.19  773.83   1 0.59968-0.59968-0.73158 0.73158-0.32428-0.32428
   0   0 -21  533.70  251.14   1 0.60005-0.60005-0.72387 0.72387-0.34049-0.34049
   0   0 -2215197.88 3232.87   1 0.60023-0.60023-0.71587 0.71587-0.35670-0.35670
   0   0 -23 -594.28  388.20   1 0.60021-0.60021-0.70758 0.70758-0.37292-0.37292
   0   0 -24 1415.32  598.04   1 0.59998-0.59998-0.69899 0.69899-0.38913-0.38913
   0   0 -25 -209.54  362.25   1 0.59955-0.59955-0.69008 0.69008-0.40535-0.40535
   0   0 -26 3472.05 1210.01   1 0.59891-0.59891-0.68086 0.68086-0.42156-0.42156
   0   1   0  -77.81   21.83   1 0.30940-0.30940 0.02065 0.02065-0.95070 0.95070
   0  -1   0  -43.79   19.47   1 0.33418-0.33418-0.02065-0.02065-0.94227 0.94227
   0   1   0  -80.60   23.97   1 0.37879-0.37879 0.02064 0.02064-0.92525 0.92525
   0  -1   0  -71.72   23.68   1 0.35875-0.35875-0.02065-0.02065-0.93320 0.93320
   0   1   1  -23.63   34.02   1-0.16336 0.16336 0.62931-0.58797-0.75978 0.79221
   0  -1  -1  -82.50   36.10   1-0.12540 0.12540 0.59139-0.63273-0.79657 0.76414
   0   1  -1   27.04   27.42   1 0.55686-0.55686-0.49184 0.53317-0.66932 0.63689
   0  -1   1  -65.77   37.68   1 0.56820-0.56820-0.52840 0.48707-0.63081 0.66325
   0   1   1   31.20   26.42   1 0.55225-0.55225 0.53539-0.49410-0.63903 0.67147
   0  -1  -1  -37.42   40.66   1 0.54514-0.54514 0.49698-0.53827-0.67514 0.64270
   0   1   2    3.55   39.76   1-0.37837 0.37837 0.80067-0.75938-0.46448 0.52931
   0  -1  -2   98.54   37.94   1-0.33498 0.33498 0.77337-0.81466-0.53822 0.47339
   0   1  -2  -57.83   84.80   1 0.59624-0.59624-0.65559 0.69692-0.46333 0.39848
   0  -1   2   64.80   73.23   1 0.59980-0.59980-0.69468 0.65335-0.39705 0.46191
   0   1   2  -76.57   79.35   1 0.56273-0.56273 0.71726-0.67598-0.41092 0.47579
   0  -1  -2 -153.66   76.96   1 0.56459-0.56459 0.67490-0.71619-0.47511 0.41024
   0   1  -3294291.5 4861.99   1 0.60024-0.60024-0.71387 0.75520-0.36067 0.26338
   0   1   3300108.5 4932.25   1 0.54968-0.54968 0.78811-0.74681-0.27696 0.37430
   0   1  -4 8704.02  292.13   1 0.59908-0.59908-0.73947 0.78080-0.30703 0.17732
   0  -1   4 8523.12  271.01   1 0.58866-0.58866-0.78815 0.74680-0.17968 0.30944
   0  -1  -4 9934.45  280.27   1 0.49778-0.49778-0.84451 0.80318 0.19748-0.32726
   0   1   4 9808.38  382.29   1 0.53493-0.53493 0.82314-0.78184-0.19047 0.32026
   0  -1  -4 9703.45  281.02   1 0.55445-0.55445 0.76973-0.81101-0.31638 0.18664
   0   1  -546105.07  930.84   1 0.59787-0.59787-0.75182 0.79317-0.27803 0.11583
   0  -1   543722.44  878.66   1 0.57991-0.57991-0.80592 0.76457-0.11908 0.28128
   0  -1  -547408.59  918.29   1 0.52083-0.52083-0.84391 0.80258 0.12863-0.29085
   0   1   545783.88  950.73   1 0.52162-0.52162 0.84346-0.80216-0.12835 0.29058
   0  -1  -545575.76  892.37   1 0.55096-0.55096 0.78400-0.82530-0.28596 0.12373
   0   1  -612027.89  664.93   1 0.59686-0.59686-0.75809 0.79944-0.26276 0.06812
   0  -1   611781.52  646.42   1 0.57154-0.57154-0.81741 0.77606-0.07193 0.26658
   0  -1  -612067.45  441.37   1 0.53626-0.53626-0.84055 0.79922 0.07673-0.27140
   0  -1  -611122.06  386.39   1 0.54861-0.54861 0.79140-0.83271-0.26961 0.07493
   0   1  -772805.70 1661.70   1 0.59635-0.59635-0.76085 0.80220-0.25585 0.02876
   0  -1   769998.25 1412.78   1 0.56351-0.56351-0.82545 0.78412-0.03290 0.26001
   0  -1  -776597.19 1448.37   1 0.54752-0.54752-0.83606 0.79473 0.03483-0.26194
   0  -1  -771627.56 1372.78   1 0.54743-0.54743 0.79482-0.83612-0.26185 0.03472
   0   1  -8 2481.30  393.34   1 0.59623-0.59623-0.76143 0.80279-0.25437-0.00514
   0  -1  -8 3387.14  559.04   1 0.55626-0.55626-0.83100 0.78967-0.00074-0.25881
   0  -1   8 2098.45  316.86   1 0.55592-0.55592-0.83123 0.78990 0.00070 0.25884
   0  -1  -8 2144.36  330.25   1 0.54710-0.54710 0.79576-0.83706-0.25968 0.00011
   0   1  -925448.21  904.33   1 0.59641-0.59641-0.76055 0.80190-0.25662-0.03533
   0  -1  -927484.44  788.71   1 0.56333-0.56333-0.82560 0.78427-0.03206-0.25993
   0  -1   923814.80  651.54   1 0.54859-0.54859-0.83552 0.79419 0.03066 0.26133
   0  -1  -926140.79  799.93   1 0.54736-0.54736 0.79503-0.83633-0.26137-0.03064
   0   1 -1029696.73  816.21   1 0.59677-0.59677-0.75859 0.79994-0.26153-0.06287
   0  -1 -1031652.63  846.72   1 0.56927-0.56927-0.81993 0.77858-0.06032-0.26408
   0  -1  1027181.32  721.33   1 0.54142-0.54142-0.83874 0.79741 0.05801 0.26643
   0  -1 -1029869.50 1540.88   1 0.54804-0.54804 0.79309-0.83439-0.26581-0.05865
   0   1 -1113804.34 1947.67   1 0.59725-0.59725-0.75581 0.79716-0.26840-0.08844
   0  -1 -1113292.69 1547.60   1 0.57426-0.57426-0.81408 0.77273-0.08648-0.27036
   0  -1  1112557.89 1042.92   1 0.53436-0.53436-0.84112 0.79979 0.08343 0.27346
   0  -1 -1113879.06  951.93   1 0.54900-0.54900 0.79022-0.83152-0.27229-0.08462
   0   1 -12 4406.42  492.51   1 0.59779-0.59779-0.75236 0.79371-0.27675-0.11253
   0  -1 -12 5461.89  502.85   1 0.57857-0.57857-0.80803 0.76668-0.11100-0.27827
   0   1 -13 7022.11  887.32   1 0.59834-0.59834-0.74835 0.78970-0.28626-0.13546
   0  -1 -13 6470.93  881.82   1 0.58232-0.58232-0.80179 0.76044-0.13427-0.28745
   0   1 -1416909.70 1090.22   1 0.59862-0.59862-0.74409 0.78541-0.29661-0.15738
   0  -1 -1415695.79  748.36   1 0.58559-0.58559-0.79534 0.75399-0.15655-0.29761
   0   1 -15  911.21  475.98   1 0.59911-0.59911-0.73914 0.78047-0.30776-0.17865
   0  -1 -15  405.12  351.38   1 0.58845-0.58845-0.78868 0.74733-0.17804-0.30856
   0   1 -16  302.02  203.17   1 0.59954-0.59954-0.73379 0.77512-0.31951-0.19933
   0  -1 -16  344.28  319.78   1 0.59095-0.59095-0.78180 0.74045-0.19889-0.32016
   0   1 -17  403.98  302.85   1 0.59988-0.59988-0.72806 0.76938-0.33176-0.21951
   0  -1 -17  627.41  388.67   1 0.59312-0.59312-0.77469 0.73334-0.21921-0.33228
   0   1 -18 5174.68  672.87   1 0.60011-0.60011-0.72196 0.76328-0.34442-0.23927
   0  -1 -18 3532.28  581.27   1 0.59498-0.59498-0.76735 0.72600-0.23909-0.34484
   0   1 -19 3514.65  655.08   1 0.60023-0.60023-0.71550 0.75683-0.35744-0.25868
   0  -1 -19 3633.87  696.63   1 0.59655-0.59655-0.75976 0.71841-0.25860-0.35777
   0   1 -20  955.24  489.75   1 0.60022-0.60022-0.70870 0.75003-0.37075-0.27780
   0  -1 -20  659.28  518.54   1 0.59785-0.59785-0.75192 0.71057-0.27780-0.37101
   0   1 -21 4804.53  525.22   1 0.60007-0.60007-0.70157 0.74289-0.38432-0.29666
   0  -1 -21 5974.94 1898.21   1 0.59862-0.59862-0.74409 0.70277-0.29659-0.38439
   0   1 -22 1128.86  426.32   1 0.59977-0.59977-0.69410 0.73542-0.39811-0.31530
   0  -1 -22 2874.03  561.99   1 0.59940-0.59940-0.73573 0.69441-0.31528-0.39813
   0   1 -23  792.34  576.90   1 0.59931-0.59931-0.68629 0.72761-0.41209-0.33375
   0  -1 -23  887.96  266.89   1 0.59992-0.59992-0.72710 0.68577-0.33377-0.41206
   0   1 -24 2237.02  648.05   1 0.59869-0.59869-0.67814 0.71947-0.42624-0.35202
   0  -1 -24 2612.85  883.42   1 0.60020-0.60020-0.71818 0.67685-0.35209-0.42617
   0   1 -25 2600.09  994.28   1 0.59788-0.59788-0.66966 0.71099-0.44054-0.37016
   0  -1 -25 3127.56  586.86   1 0.60022-0.60022-0.70896 0.66763-0.37026-0.44043
   0   1 -26  166.77  415.85   1 0.59690-0.59690-0.66084 0.70216-0.45496-0.38816
   0  -1 -26  332.38  378.22   1 0.60000-0.60000-0.69944 0.65811-0.38829-0.45483
   0   2   0  -68.07   83.89   1 0.29672-0.29672 0.04130 0.04130-0.95407 0.95407
   0  -2   0   11.40   73.79   1 0.34640-0.34640-0.04131-0.04131-0.93717 0.93717
   0   2   0 -170.38   84.61   1 0.38842-0.38842 0.04128 0.04128-0.92055 0.92055
   0  -2   0 -156.68   71.47   1 0.34851-0.34851-0.04130-0.04130-0.93639 0.93639
   0  -2  -1 1664.79   99.08   1 0.48437-0.48437 0.27804-0.36065-0.82950 0.79706
   0   2   2138057.3 2225.85   1-0.18212 0.18212 0.64730-0.56461-0.74015 0.80500
   0  -2  -2143607.2 2340.93   1-0.10632 0.10632 0.57166-0.65429-0.81356 0.74872
   0   2  -2139740.7 2273.43   1 0.55056-0.55056-0.47299 0.55565-0.68785 0.62299
   0  -2   2140029.4 2257.49   1 0.57325-0.57325-0.54611 0.46346-0.61084 0.67570
   0   2   2146658.3 2387.44   1 0.55521-0.55521 0.55405-0.47146-0.62028 0.68516
   0  -2  -2138792.2 2287.60   1 0.54101-0.54101 0.47722-0.55982-0.69250 0.62761
   0   2   3 1611.17  199.43   1-0.31877 0.31877 0.76207-0.67948-0.56358 0.66082
   0  -2  -3 1460.76  227.27   1-0.23732 0.23732 0.69723-0.77992-0.67641 0.57913
   0   2  -3 1406.13  193.49   1 0.58125-0.58125-0.57690 0.65955-0.57387 0.47657
   0  -2   3 1595.83  192.69   1 0.59570-0.59570-0.65150 0.56885-0.46976 0.56704
   0   2   3 1674.50  281.44   1 0.56458-0.56458 0.66872-0.58615-0.48378 0.58109
   0  -2  -3 1198.86  303.33   1 0.55979-0.55979 0.58861-0.67121-0.58323 0.48590
   0  -2  -4  736.33  138.23   1-0.31220 0.31220 0.75733-0.83992-0.57356 0.44391
   0   2  -4  556.23  214.61   1 0.59313-0.59313-0.63454 0.71720-0.49552 0.36580
   0  -2   4  578.54  229.17   1 0.60024-0.60024-0.71271 0.63006-0.36295 0.49266
   0   2   4  664.14  165.16   1 0.56054-0.56054 0.73689-0.65432-0.37784 0.50758
   0  -2  -4 1280.79  224.65   1 0.56426-0.56426 0.65217-0.73475-0.50622 0.37648
   0  -2  -546783.27 1104.69   1-0.35619 0.35619 0.78728-0.86987-0.50329 0.34123
   0   2  -540812.05  917.00   1 0.59774-0.59774-0.66829 0.75095-0.44280 0.28066
   0   2   545849.89  921.24   1 0.55217-0.55217 0.77982-0.69722-0.29491 0.45714
   0  -2  -545597.46  928.30   1 0.56433-0.56433 0.68991-0.77248-0.45338 0.29120
   0   2  -6 6437.92  653.12   1 0.59948-0.59948-0.68889 0.77154-0.40748 0.21291
   0  -2   6 5549.79  293.91   1 0.59268-0.59268-0.77622 0.69352-0.21491 0.40956
   0   2   6 6304.86  730.61   1 0.54194-0.54194 0.80881-0.72620-0.22831 0.42299
   0  -2  -6 5786.84  827.37   1 0.56306-0.56306 0.71322-0.79580-0.41744 0.22283
   0   2  -7  292.63  182.10   1 0.60008-0.60007-0.70171 0.78437-0.38405 0.15705
   0  -2   7  -93.15  219.00   1 0.58615-0.58615-0.79412 0.71141-0.16060 0.38769
   0  -2  -7  165.93  204.20   1 0.50431-0.50431-0.84479 0.76213 0.17887-0.40598
   0   2   7  438.42  146.99   1 0.53141-0.53141 0.82925-0.74665-0.17300 0.40013
   0  -2  -7  558.81  237.93   1 0.56166-0.56166 0.72792-0.81049-0.39327 0.16622
   0   2  -8 1261.56  320.00   1 0.60023-0.60023-0.70963 0.79228-0.36896 0.10954
   0  -2   8 1008.59  148.33   1 0.57912-0.57912-0.80719 0.72448-0.11428 0.37380
   0  -2  -8 1828.53  256.42   1 0.52172-0.52172-0.84379 0.76113 0.12578-0.38533
   0   2   8 1456.31  309.86   1 0.52101-0.52101 0.84423-0.76163-0.12572 0.38530
   0  -2  -8  829.34  153.89   1 0.56051-0.56051 0.73712-0.81969-0.37744 0.11796
   0   2  -9 1030.11  151.56   1 0.60024-0.60024-0.71426 0.79691-0.35990 0.06805
   0  -2   9  553.21  202.04   1 0.57188-0.57188-0.81701 0.73431-0.07372 0.36569
   0  -2  -9 1100.38  361.73   1 0.53524-0.53524-0.84086 0.75820 0.08033-0.37233
   0   2   9 1213.93  152.25   1 0.51087-0.51087 0.85551-0.77291-0.08430 0.37632
   0  -2  -9 1006.64  230.41   1 0.55971-0.55971 0.74263-0.82521-0.36770 0.07578
   0   2 -10 2901.91  454.25   1 0.60022-0.60022-0.71657 0.79922-0.35531 0.03103
   0  -2  10 1847.60  246.96   1 0.56446-0.56446-0.82461 0.74195-0.03733 0.36178
   0  -2 -10 2689.23  339.05   1 0.54608-0.54608-0.83675 0.75409 0.04043-0.36487
   0  -2 -10 2484.71  314.34   1 0.55926-0.55926 0.74553-0.82811-0.36248 0.03813
   0   2 -11 8431.53 1241.03   1 0.60021-0.60021-0.71718 0.79983-0.35410-0.00260
   0  -2  11 7726.10  817.35   1 0.55710-0.55710-0.83043 0.74777-0.00432 0.36121
   0  -2 -1110675.42 1229.04   1 0.55499-0.55499-0.83184 0.74918 0.00464-0.36154
   0  -2 -11 8085.67  842.35   1 0.55910-0.55910 0.74651-0.82908-0.36071 0.00393
   0   2 -12  391.68  186.11   1 0.60022-0.60022-0.71647 0.79912-0.35552-0.03361
   0   2 -1313844.37 1912.71   1 0.60024-0.60024-0.71471 0.79736-0.35901-0.06255
   0  -2 -1312478.27  854.52   1 0.56882-0.56882-0.82040 0.73770-0.05809-0.36363
   0   2 -14  540.36  270.14   1 0.60024-0.60024-0.71210 0.79475-0.36416-0.08983
   0  -2 -14  535.45  289.31   1 0.57424-0.57424-0.81411 0.73141-0.08637-0.36780
   0   2 -15  259.82  308.85   1 0.60022-0.60022-0.70875 0.79140-0.37066-0.11575
   0  -2 -15 -336.79  340.10   1 0.57892-0.57892-0.80749 0.72479-0.11309-0.37351
   0   2 -16  744.78  353.49   1 0.60016-0.60016-0.70477 0.78743-0.37827-0.14057
   0  -2 -16  969.05  399.34   1 0.58297-0.58297-0.80058 0.71788-0.13855-0.38049
   0   2 -17 3798.00  772.70   1 0.60003-0.60003-0.70023 0.78288-0.38681-0.16445
   0  -2 -17 5459.22  573.10   1 0.58647-0.58647-0.79339 0.71069-0.16296-0.38852
   0   2 -18  949.86  440.79   1 0.59982-0.59982-0.69518 0.77783-0.39614-0.18756
   0  -2 -18  864.97  379.89   1 0.58950-0.58950-0.78593 0.70323-0.18651-0.39742
   0   2 -19  651.47  391.61   1 0.59953-0.59953-0.68965 0.77230-0.40612-0.21000
   0  -2 -19 1273.14  407.05   1 0.59210-0.59210-0.77820 0.69550-0.20932-0.40705
   0   2 -20 1548.13  413.11   1 0.59913-0.59913-0.68368 0.76633-0.41667-0.23188
   0  -2 -20 1717.40  557.94   1 0.59430-0.59430-0.77019 0.68749-0.23150-0.41731
   0   2 -21 2512.62  635.67   1 0.59861-0.59861-0.67728 0.75994-0.42771-0.25327
   0  -2 -21 2867.58  753.72   1 0.59614-0.59614-0.76192 0.67922-0.25315-0.42810
   0   2 -22  663.65  419.27   1 0.59797-0.59797-0.67048 0.75313-0.43917-0.27424
   0  -2 -22  695.58  317.41   1 0.59764-0.59764-0.75336 0.67066-0.27434-0.43935
   0   2 -23  297.89  251.31   1 0.59719-0.59719-0.66329 0.74594-0.45100-0.29483
   0  -2 -23 1036.52  346.32   1 0.59854-0.59854-0.74480 0.66215-0.29496-0.45088
   0   2 -24   40.86  270.36   1 0.59626-0.59626-0.65570 0.73836-0.46316-0.31511
   0  -2 -24  721.65  372.97   1 0.59940-0.59940-0.73568 0.65303-0.31539-0.46287
   0   2 -25  664.18  255.53   1 0.59517-0.59517-0.64774 0.73039-0.47560-0.33509
   0  -2 -25  733.48  230.43   1 0.59996-0.59996-0.72627 0.64361-0.33551-0.47518
   0   2 -26 1401.48  534.17   1 0.59391-0.59391-0.63939 0.72205-0.48829-0.35483
   0  -2 -26  962.99  344.03   1 0.60022-0.60022-0.71654 0.63389-0.35537-0.48775
   0   3   0  379.77  150.88   1 0.28384-0.28384 0.06196 0.06196-0.95686 0.95686
   0  -3   0  179.57  138.53   1 0.35831-0.35831-0.06196-0.06196-0.93154 0.93154
   0   3   0  340.93  134.67   1 0.39785-0.39785 0.06193 0.06193-0.91535 0.91535
   0  -3   0  279.82  174.48   1 0.33807-0.33807-0.06195-0.06195-0.93907 0.93907
   0   3   195753.83 1594.99   1 0.11114-0.11114 0.31303-0.18910-0.94321 0.97564
   0  -3  -199673.47 1648.28   1 0.20275-0.20275 0.18544-0.30936-0.96150 0.92907
   0   3  -193493.51 1619.24   1 0.41617-0.41617-0.16762 0.29155-0.89370 0.86127
   0  -3   1100484.7 1668.95   1 0.47367-0.47367-0.28415 0.16021-0.83359 0.86600
   0   3   1100616.6 1733.29   1 0.48597-0.48597 0.28268-0.15877-0.82699 0.85942
   0  -3  -194683.15 1575.12   1 0.44172-0.44172 0.16455-0.28842-0.88193 0.84952
   0   3  -198920.45 1650.27   1 0.27393-0.27393-0.18100 0.30491-0.94456 0.91213
   0   3   2 3611.65  195.64   1-0.06171 0.06171 0.52349-0.39954-0.84978 0.91463
   0  -3  -2 3481.83  556.63   1 0.04340-0.04340 0.39999-0.52394-0.91548 0.85064
   0   3  -2 3273.83  223.35   1 0.49804-0.49804-0.33854 0.46248-0.79833 0.73352
   0  -3   2 3394.79  813.14   1 0.54229-0.54229-0.44994 0.32600-0.70955 0.77436
   0   3   2 3990.81  534.74   1 0.53539-0.53539 0.45244-0.32855-0.71319 0.77807
   0  -3  -2 3927.42  457.79   1 0.50386-0.50386 0.33737-0.46128-0.79517 0.73029
   0   3   349518.17  963.17   1-0.20071 0.20072 0.66464-0.54061-0.71969 0.81697
   0  -3  -349577.31 1166.42   1-0.08698 0.08698 0.55109-0.67504-0.82989 0.73263
   0   3  -348871.68  964.85   1 0.54385-0.54385-0.45377 0.57776-0.70591 0.60861
   0  -3   347466.98  927.84   1 0.57788-0.57788-0.56345 0.43947-0.59039 0.68768
   0   3   348331.54 1029.61   1 0.55779-0.55779 0.57235-0.44845-0.60106 0.69839
   0  -3  -348833.33  934.99   1 0.53648-0.53648 0.45710-0.58099-0.70939 0.61206
   0   3   413124.61  545.56   1-0.30028 0.30028 0.74851-0.62463-0.59122 0.72087
   0  -3  -412771.73  512.29   1-0.18061 0.18061 0.64588-0.76991-0.74176 0.61205
   0   3  -412915.31  577.97   1 0.56844-0.56844-0.52921 0.65320-0.62991 0.50019
   0  -3   412428.71  398.34   1 0.59399-0.59399-0.63991 0.51593-0.48752 0.61723
   0   3   411950.95  381.91   1 0.56436-0.56436 0.65550-0.53164-0.50179 0.63153
   0  -3  -412097.59  504.56   1 0.55258-0.55258 0.53738-0.66127-0.63707 0.50730
   0   3   552405.07 1080.66   1-0.36977 0.36977 0.79563-0.67174-0.47982 0.64188
   0  -3  -551814.86 1002.92   1-0.24495 0.24495 0.70376-0.82779-0.66687 0.50473
   0   3  -551536.83 1050.76   1 0.58176-0.58176-0.57902 0.70301-0.57120 0.40904
   0  -3   549806.50 1016.44   1 0.59969-0.59969-0.69248 0.56851-0.40103 0.56317
   0   3   553063.66 1065.44   1 0.56302-0.56302 0.71369-0.58984-0.41669 0.57886
   0  -3  -549037.05  973.43   1 0.56010-0.56010 0.59139-0.71529-0.58011 0.41790
   0  -3  -6103244.4 1803.32   1-0.28869 0.28869 0.73967-0.86356-0.60789 0.41341
   0   3  -6103610.3 1892.70   1 0.58911-0.58911-0.61249 0.73648-0.52706 0.33247
   0  -3   6106703.2 2045.92   1 0.59979-0.59979-0.72974 0.60576-0.32820 0.52277
   0  -3  -6104254.4 1901.09   1 0.56337-0.56337 0.62822-0.75211-0.53660 0.34195
   0  -3  -742958.71 1626.52   1-0.31888 0.31888 0.76215-0.88603-0.56341 0.33652
   0  -3   738298.82  848.42   1 0.59708-0.59708-0.75679 0.63273-0.26599 0.49307
   0   3   742146.72  932.58   1 0.55033-0.55033 0.78607-0.66216-0.28146 0.50859
   0  -3  -741572.17  911.92   1 0.56432-0.56432 0.65385-0.77771-0.50400 0.27695
   0  -3  -8138264.2 2489.78   1-0.33988 0.33988 0.77668-0.90056-0.53031 0.27101
   0   3  -8140224.0 2603.41   1 0.59563-0.59563-0.65105 0.77503-0.47047 0.21104
   0   3   8134354.9 2509.08   1 0.54170-0.54170 0.80934-0.68543-0.22697 0.48654
   0  -3  -8136004.1 2439.16   1 0.56459-0.56459 0.67154-0.79540-0.47985 0.22037
   0  -3  -959961.32 1228.20   1-0.35455 0.35455 0.78624-0.91013-0.50606 0.21435
   0   3  -966148.93 1434.21   1 0.59701-0.59701-0.66181 0.78579-0.45339 0.16154
   0  -3   958051.77 1223.74   1 0.58669-0.58669-0.79291 0.66886-0.16455 0.45652
   0  -3  -964054.33 1433.66   1 0.50171-0.50171-0.84472 0.72072 0.18636-0.47836
   0   3   963472.26 1397.16   1 0.53258-0.53258 0.82729-0.70338-0.17872 0.47074
   0  -3  -960225.14 1322.48   1 0.56448-0.56448 0.68379-0.80765-0.46236 0.17044
   0  -3 -1089948.39 2315.67   1-0.36471 0.36471 0.79257-0.91646-0.48867 0.16454
   0   3 -1088578.53 2386.77   1 0.59782-0.59782-0.66901 0.79299-0.44161 0.11733
   0  -3  1088681.78 2320.44   1 0.58038-0.58038-0.80515 0.68110-0.12196 0.44637
   0  -3 -1098411.61 2648.11   1 0.51828-0.51828-0.84421 0.72022 0.13671-0.46115
   0   3  1085062.91 2283.38   1 0.52324-0.52324 0.84135-0.71745-0.13539 0.45986
   0  -3 -1089880.42 2367.35   1 0.56425-0.56425 0.69210-0.81596-0.45011 0.12576
   0  -3 -1113210.09 1676.07   1-0.37158 0.37158 0.79671-0.92059-0.47662 0.12008
   0   3 -1117116.99 1956.45   1 0.59827-0.59827-0.67357 0.79755-0.43400 0.07729
   0  -3 -1113627.21  699.19   1 0.53175-0.53175-0.84183 0.71784 0.09248-0.44937
   0   3  1115789.90 1246.18   1 0.51382-0.51382 0.85250-0.72860-0.09598 0.45290
   0   3 -12 5311.45  736.36   1 0.59851-0.59851-0.67610 0.80008-0.42972 0.04058
   0  -3 -12 6113.57  545.69   1 0.54290-0.54290-0.83815 0.71415 0.05251-0.44185
   0   3 -1311148.35 1699.43   1 0.59859-0.59859-0.67704 0.80102-0.42812 0.00656
   0  -3 -1311335.48  938.87   1 0.55227-0.55227-0.83351 0.70952 0.01591-0.43769
   0   3 -14 8871.24 1407.21   1 0.59856-0.59856-0.67669 0.80067-0.42872-0.02527
   0  -3 -14 8786.01  984.63   1 0.56022-0.56022-0.82814 0.70415-0.01797-0.43625
   0   3 -15  654.22  231.94   1 0.59843-0.59843-0.67528 0.79925-0.43112-0.05529
   0  -3 -15 2046.39  409.85   1 0.56708-0.56708-0.82216 0.69811-0.04952-0.43708
   0   3 -16 8582.24 1406.16   1 0.59821-0.59821-0.67296 0.79693-0.43503-0.08380
   0  -3 -1610924.12  653.22   1 0.57295-0.57295-0.81573 0.69168-0.07939-0.43965
   0   3 -1714543.51 1830.02   1 0.59790-0.59790-0.66985 0.79383-0.44022-0.11105
   0  -3 -1714183.63  731.50   1 0.57802-0.57802-0.80887 0.68482-0.10775-0.44374
   0   3 -18 3903.93  620.27   1 0.59750-0.59750-0.66606 0.79003-0.44648-0.13721
   0  -3 -18 4380.62  678.11   1 0.58240-0.58240-0.80163 0.67758-0.13484-0.44909
   0   3 -19 2310.82  386.40   1 0.59699-0.59699-0.66164 0.78562-0.45367-0.16245
   0  -3 -19 2296.69  572.98   1 0.58619-0.58619-0.79404 0.66999-0.16086-0.45551
   0   3 -20 3986.53  829.72   1 0.59638-0.59638-0.65665 0.78063-0.46165-0.18690
   0  -3 -20 4070.47  626.21   1 0.58943-0.58943-0.78611 0.66206-0.18596-0.46285
   0   3 -21 1834.59  635.80   1 0.59565-0.59565-0.65114 0.77512-0.47032-0.21066
   0  -3 -21 1240.29  436.35   1 0.59220-0.59220-0.77786 0.65381-0.21027-0.47097
   0   3 -22  187.37  387.25   1 0.59479-0.59479-0.64514 0.76912-0.47959-0.23382
   0  -3 -22  302.34  256.42   1 0.59452-0.59452-0.76930 0.64524-0.23391-0.47978
   0   3 -23  847.77  418.95   1 0.59380-0.59380-0.63866 0.76264-0.48938-0.25645
   0  -3 -23  243.19  338.86   1 0.59643-0.59643-0.76042 0.63636-0.25695-0.48918
   0   3 -24  508.74  385.31   1 0.59266-0.59266-0.63174 0.75572-0.49964-0.27862
   0  -3 -24 -137.24  338.48   1 0.59795-0.59795-0.75122 0.62717-0.27947-0.49910
   0   3 -25  532.04  228.91   1 0.59137-0.59137-0.62438 0.74836-0.51031-0.30038
   0  -3 -25  408.78  359.05   1 0.59884-0.59884-0.74200 0.61802-0.30135-0.50934
   0   3 -26 1205.75  429.65   1 0.58991-0.58991-0.61657 0.74055-0.52138-0.32183
   0  -3 -26 1477.07  452.85   1 0.59965-0.59965-0.73217 0.60819-0.32301-0.52011
   0   4   088541.57 1624.96   1 0.27077-0.27077 0.08261 0.08261-0.95909 0.95909
   0  -4   088481.40 1576.65   1 0.37003-0.37003-0.08262-0.08262-0.92533 0.92533
   0   4   092108.07 1638.89   1 0.40708-0.40708 0.08257 0.08257-0.90965 0.90965
   0  -4   083297.88 1434.44   1 0.32743-0.32743-0.08260-0.08260-0.94125 0.94125
   0   4   131960.57  731.66   1 0.14112-0.14112 0.27258-0.10735-0.95172 0.98415
   0  -4  -134909.59  728.65   1 0.25782-0.25782 0.10278-0.26801-0.96070 0.92827
   0   4  -133336.01  731.25   1 0.37696-0.37696-0.09499 0.26023-0.92134 0.88891
   0  -4   131895.99  678.27   1 0.45890-0.45890-0.25282 0.08756-0.85175 0.88415
   0   4   133091.40  715.78   1 0.47498-0.47498 0.25136-0.08614-0.84333 0.87576
   0  -4  -132863.17  712.49   1 0.41130-0.41130 0.09217-0.25732-0.90682 0.87442
   0   4  -133746.23  849.16   1 0.31872-0.31872-0.09923 0.26444-0.94263 0.91021
   0   4   2 2171.81  339.55   1 0.00524-0.00524 0.44643-0.28117-0.89480 0.95964
   0  -4  -2 2299.70  207.01   1 0.13726-0.13726 0.27785-0.44309-0.95076 0.88590
   0   4  -2 2657.39  297.36   1 0.45339-0.45339-0.24138 0.40662-0.85799 0.79314
   0  -4   2 2605.08  381.34   1 0.52056-0.52056-0.39267 0.22741-0.75817 0.82298
   0   4   2 2674.55  372.87   1 0.52025-0.52025 0.39305-0.22783-0.75818 0.82305
   0  -4  -2 2814.20  318.13   1 0.47002-0.47002 0.23822-0.40337-0.84989 0.78508
   0   4   342534.45 1074.63   1-0.11804 0.11804 0.58381-0.41844-0.80325 0.90053
   0  -4  -340244.68  796.36   1 0.02544-0.02544 0.42207-0.58734-0.90620 0.80893
   0   4  -340961.50  870.53   1 0.50405-0.50405-0.35258 0.51783-0.78842 0.69121
   0  -4   343079.65  890.19   1 0.55956-0.55956-0.50020 0.33488-0.66082 0.75811
   0   4   344355.77  977.66   1 0.54670-0.54670 0.50484-0.33965-0.66801 0.76534
   0   4   4 2466.64  364.82   1-0.21916 0.21916 0.68132-0.51595-0.69839 0.82810
   0  -4  -4 2401.01  453.76   1-0.06748 0.06748 0.52987-0.69513-0.84538 0.71570
   0   4  -4 2994.62  435.18   1 0.53652-0.53652-0.43413 0.59939-0.72364 0.59402
   0  -4   4 2275.26  352.01   1 0.58209-0.58209-0.58041 0.41510-0.56945 0.69918
   0   4   4 2380.34  408.95   1 0.55997-0.55997 0.59027-0.42508-0.58137 0.71114
   0  -4  -4 2206.23  370.81   1 0.53164-0.53164 0.43646-0.60168-0.72584 0.59609
   0   4   518897.98  532.79   1-0.29736 0.29736 0.74631-0.58113-0.59546 0.75752
   0  -4  -518714.54  670.80   1-0.13958 0.13958 0.60578-0.77115-0.78328 0.62115
   0   4  -518881.41  711.21   1 0.55727-0.55727-0.49310 0.65841-0.66805 0.50589
   0  -4   517262.47  491.84   1 0.59402-0.59402-0.64009 0.47479-0.48725 0.64939
   0   4   518427.16  663.17   1 0.56436-0.56436 0.65527-0.49013-0.50210 0.66427
   0  -4  -516527.23  563.69   1 0.54554-0.54554 0.49896-0.66416-0.67335 0.51114
   0   4   620128.61  892.82   1-0.35708 0.35708 0.78784-0.62266-0.50178 0.69625
   0  -4  -619174.38  622.58   1-0.19399 0.19399 0.65842-0.82380-0.72721 0.53265
   0   4  -619663.14  839.68   1 0.57033-0.57033-0.53573 0.70105-0.62266 0.42807
   0  -4   618988.31 1025.47   1 0.59922-0.59922-0.68496 0.51965-0.41443 0.60900
   0   4   620508.16  692.33   1 0.56365-0.56365 0.70481-0.53967-0.43072 0.62533
   0  -4  -618335.94  528.10   1 0.55378-0.55378 0.54476-0.70995-0.62972 0.43507
   0  -4  -771065.95 1438.54   1-0.23448 0.23448 0.69478-0.86015-0.67992 0.45293
   0   4  -771951.34 1460.08   1 0.57872-0.57872-0.56674 0.73206-0.58640 0.35938
   0  -4   765556.54 1366.88   1 0.60018-0.60018-0.71919 0.55389-0.35004 0.57704
   0   4   766600.64 1405.18   1 0.55964-0.55964 0.74308-0.57793-0.36690 0.59395
   0  -4  -763988.71 1645.63   1 0.55858-0.55858 0.57848-0.74367-0.59442 0.36732
   0  -4  -8210380.1 5176.52   1-0.26444 0.26444 0.72039-0.88557-0.64117 0.38187
   0  -4  -8213915.9 5306.78   1 0.56134-0.56134 0.60339-0.76858-0.56639 0.30685
   0  -4  -918593.01 1162.60   1-0.28676 0.28676 0.73818-0.90336-0.61061 0.31890
   0   4  -918877.09  907.29   1 0.58779-0.58779-0.60598 0.77130-0.53597 0.24408
   0  -4   919531.01 1085.00   1 0.59518-0.59518-0.76647 0.60107-0.24138 0.53335
   0   4   920035.05 1499.53   1 0.54682-0.54682 0.79654-0.63133-0.25788 0.54991
   0  -4  -921919.82  752.18   1 0.56292-0.56292 0.62179-0.78698-0.54450 0.25252
   0  -4 -10 8109.51 1275.53   1-0.30332 0.30332 0.75079-0.91597-0.58677 0.26264
   0   4 -10 6765.16  479.24   1 0.59019-0.59019-0.61803 0.78335-0.51933 0.19501
   0   4  1010061.44 1484.60   1 0.53883-0.53883 0.81557-0.65036-0.21096 0.53543
   0  -4 -10 8497.27  964.98   1 0.56353-0.56353 0.63550-0.80065-0.52778 0.20343
   0  -4 -1131452.85 1297.34   1-0.31554 0.31554 0.75975-0.92493-0.56851 0.21197
   0   4 -1134084.29 1408.97   1 0.59178-0.59178-0.62665 0.79195-0.50705 0.15034
   0  -4 -1134919.09 1435.48   1 0.50577-0.50577-0.84480 0.67948 0.17460-0.53149
   0   4  1130507.91 1303.47   1 0.53035-0.53035 0.83097-0.66576-0.16794 0.52485
   0   4 -12  801.58  502.66   1 0.59280-0.59280-0.63259 0.79789-0.49840 0.10926
   0  -4 -12  203.84  209.25   1 0.52084-0.52084-0.84391 0.67858 0.12857-0.51791
   0   4  12  -73.12  267.97   1 0.52158-0.52158 0.84351-0.67831-0.12817 0.51753
   0   4 -1354709.41 4988.23   1 0.59343-0.59343-0.63642 0.80172-0.49274 0.07118
   0  -4 -1356279.20 5161.43   1 0.53348-0.53348-0.84137 0.67605 0.08649-0.50827
   0   4  1350264.03 1535.15   1 0.51260-0.51260 0.85377-0.68856-0.09113 0.51294
   0   4 -1412683.12  794.99   1 0.59377-0.59377-0.63853 0.80384-0.48958 0.03559
   0  -4 -1414057.54 1528.37   1 0.54419-0.54419-0.83760 0.67228 0.04766-0.50188
   0   4 -15 1022.60  284.47   1 0.59389-0.59389-0.63923 0.80454-0.48853 0.00211
   0  -4 -15 1164.20  388.37   1 0.55334-0.55334-0.83287 0.66755 0.01151-0.49818
   0   4 -16 3084.88  587.40   1 0.59381-0.59381-0.63875 0.80405-0.48926-0.02958
   0  -4 -16 3839.04  669.59   1 0.56121-0.56121-0.82736 0.66204-0.02239-0.49672
   0   4 -17 1425.84  612.08   1 0.59357-0.59357-0.63725 0.80255-0.49150-0.05976
   0  -4 -17 2018.89  566.45   1 0.56805-0.56805-0.82120 0.65579-0.05425-0.49723
   0   4 -18 7608.75  719.76   1 0.59318-0.59318-0.63486 0.80017-0.49505-0.08865
   0  -4 -18 6200.26  907.02   1 0.57393-0.57393-0.81451 0.64910-0.08467-0.49925
   0   4 -19 1656.97  583.39   1 0.59265-0.59265-0.63169 0.79699-0.49972-0.11641
   0  -4 -19 1190.09  378.98   1 0.57903-0.57903-0.80733 0.64193-0.11373-0.50264
   0   4 -20  604.43  449.65   1 0.59198-0.59198-0.62782 0.79312-0.50536-0.14319
   0  -4 -20 1043.70  523.58   1 0.58343-0.58343-0.79971 0.63431-0.14161-0.50719
   0   4 -21  429.36  385.18   1 0.59117-0.59117-0.62330 0.78860-0.51185-0.16912
   0  -4 -21  514.54  364.29   1 0.58722-0.58722-0.79169 0.62629-0.16849-0.51276
   0   4 -22 1152.15  423.26   1 0.59021-0.59021-0.61817 0.78349-0.51913-0.19436
   0  -4 -22  423.93  534.66   1 0.59045-0.59045-0.78329 0.61788-0.19448-0.51921
   0   4 -23  131.96  253.86   1 0.58911-0.58911-0.61251 0.77783-0.52703-0.21889
   0  -4 -23  514.33  257.48   1 0.59317-0.59317-0.77451 0.60911-0.21970-0.52642
   0   4 -24  895.25  508.04   1 0.58786-0.58786-0.60632 0.77164-0.53551-0.24284
   0  -4 -24  949.93  371.80   1 0.59542-0.59542-0.76537 0.59997-0.24425-0.53431
   0   4 -25 -118.35  368.10   1 0.58646-0.58646-0.59963 0.76495-0.54451-0.26627
   0  -4 -25  405.84  233.06   1 0.59723-0.59723-0.75588 0.59048-0.26821-0.54280
   0   5   0  193.15  163.33   1 0.25750-0.25750 0.10327 0.10327-0.96074 0.96074
   0  -5   0  109.24  198.73   1 0.38155-0.38155-0.10327-0.10327-0.91855 0.91855
   0   5   0 -294.05  271.08   1 0.41610-0.41610 0.10322 0.10322-0.90343 0.90343
   0  -5   0   89.19  162.62   1 0.31659-0.31659-0.10325-0.10325-0.94292 0.94292
   0   5   1 1155.35  223.34   1 0.15339-0.15339 0.25568-0.04914-0.95451 0.98694
   0  -5  -1 1414.64  193.14   1 0.29501-0.29501 0.04406-0.25060-0.95447 0.92204
   0   5  -1 1291.31  273.42   1 0.34640-0.34640-0.04130 0.24785-0.93717 0.90475
   0  -5   1  584.04  206.29   1 0.45300-0.45300-0.24058 0.03403-0.85843 0.89085
   0   5   1 1535.79  400.04   1 0.47034-0.47034 0.23910-0.03266-0.84947 0.88187
   0  -5  -1 1198.13  172.87   1 0.38728-0.38728 0.03882-0.24526-0.92114 0.88873
   0   5  -1  773.38  199.81   1 0.34855-0.34855-0.04123 0.24774-0.93638 0.90395
   0   5   2 9642.33  658.14   1 0.04280-0.04280 0.40073-0.19415-0.91519 0.98003
   0  -5  -210972.13  576.76   1 0.20075-0.20075 0.18843-0.39497-0.96134 0.89649
   0   5  -211182.08  524.51   1 0.41595-0.41595-0.16719 0.37375-0.89388 0.82903
   0  -5   210113.50  627.94   1 0.50688-0.50688-0.35929 0.15272-0.78356 0.84837
   0   5   210956.84  422.71   1 0.51043-0.51043 0.35892-0.15239-0.78143 0.84630
   0  -5  -2 9772.55  401.04   1 0.44133-0.44133 0.16359-0.37003-0.88230 0.81749
   0   5  -211458.24  516.18   1 0.27269-0.27269-0.18318 0.38969-0.94450 0.87964
   0   5   3  752.24  263.38   1-0.06362 0.06362 0.52561-0.31903-0.84834 0.94560
   0  -5  -3  730.63  108.17   1 0.10772-0.10772 0.31757-0.52411-0.94209 0.84480
   0   5  -3  495.76  260.76   1 0.46710-0.46710-0.27007 0.47664-0.84194 0.74473
   0  -5   3  761.22  162.21   1 0.54504-0.54504-0.45713 0.25048-0.70281 0.80011
   0   5   3  443.28  143.28   1 0.53706-0.53706 0.45958-0.25309-0.70734 0.80467
   0  -5  -3  930.01  147.93   1 0.48065-0.48065 0.26733-0.47386-0.83516 0.73785
   0   5   4 4408.72  618.15   1-0.15807 0.15807 0.62415-0.41743-0.76514 0.89485
   0  -5  -4 4351.83  701.83   1 0.02363-0.02363 0.42427-0.63085-0.90522 0.77553
   0   5  -4 4423.60  448.24   1 0.50352-0.50352-0.35133 0.55790-0.78931 0.65970
   0  -5   4 4288.00  669.60   1 0.57019-0.57019-0.53526 0.32861-0.62319 0.75291
   0   5   4 4950.52  779.58   1 0.55329-0.55329 0.54170-0.33521-0.63279 0.76256
   0  -5  -4 4424.77  596.32   1 0.50786-0.50786 0.35039-0.55691-0.78695 0.65720
   0   5   512828.48  645.26   1-0.23745 0.23745 0.69734-0.49063-0.67625 0.83838
   0  -5  -512233.11  874.85   1-0.04783 0.04783 0.50798-0.71456-0.86003 0.69792
   0   5  -512878.54  658.34   1 0.52897-0.52897-0.41415 0.62072-0.74071 0.57868
   0   5   512683.05 1525.22   1 0.56176-0.56176 0.60783-0.40134-0.56121 0.72342
   0  -5  -511515.37  436.77   1 0.52632-0.52632 0.41560-0.62212-0.74179 0.57960
   0   5   611833.90  817.26   1-0.30177 0.30177 0.74963-0.54315-0.58904 0.78352
   0  -5  -610466.36 1167.95   1-0.10609 0.10609 0.57141-0.77799-0.81377 0.61924
   0   5  -612120.84  537.98   1 0.54687-0.54687-0.46232 0.66896-0.69798 0.50339
   0  -5   610858.33  505.35   1 0.59487-0.59487-0.64570 0.43907-0.47873 0.67330
   0   5   612077.89 1468.25   1 0.56449-0.56449 0.66101-0.45458-0.49437 0.68898
   0  -5  -610860.87  496.08   1 0.53862-0.53862 0.46644-0.67293-0.70165 0.50699
   0   5   7 2421.59  377.43   1-0.35364 0.35364 0.78567-0.57919-0.50759 0.73448
   0  -5  -7 1878.95  300.07   1-0.15233 0.15233 0.61849-0.82521-0.77088 0.54389
   0   5  -7 2960.65  338.07   1 0.55922-0.55922-0.49914 0.70579-0.66190 0.43488
   0  -5   7 2207.88  386.10   1 0.59918-0.59918-0.68438 0.47775-0.41544 0.64243
   0   5   7 2608.11  396.87   1 0.56371-0.56371 0.70371-0.49727-0.43245 0.65949
   0  -5  -7 2168.36  312.34   1 0.54687-0.54687 0.50569-0.71218-0.66723 0.44013
   0  -5  -8 8606.10 1142.35   1-0.18882 0.18882 0.65360-0.86032-0.73289 0.47348
   0   5  -8 9694.18  672.61   1 0.56788-0.56788-0.52731 0.73396-0.63201 0.37255
   0  -5   8 8215.34 1135.47   1 0.60023-0.60023-0.71534 0.50871-0.35776 0.61719
   0   5   8 9906.12 1302.89   1 0.56035-0.56035 0.73825-0.53182-0.37546 0.63495
   0  -5  -8 8137.06  995.58   1 0.55236-0.55236 0.53605-0.74254-0.63839 0.37885
   0  -5  -9  979.51  198.55   1-0.21732 0.21732 0.67968-0.88640-0.70056 0.40872
   0   5  -9 1219.39  291.46   1 0.57400-0.57400-0.54886 0.75550-0.60767 0.31578
   0  -5   9  640.75  222.85   1 0.59900-0.59900-0.74034 0.53371-0.30508 0.59694
   0   5   9 1050.13  265.50   1 0.55523-0.55523 0.76640-0.55997-0.32302 0.61493
   0  -5  -9  990.11  139.66   1 0.55601-0.55601 0.55948-0.76597-0.61467 0.32269
   0  -5 -10 1540.27  353.71   1-0.23950 0.23951 0.69911-0.90583-0.67369 0.34943
   0   5 -10 1244.16  328.60   1 0.57835-0.57835-0.56528 0.77193-0.58817 0.26386
   0   5  10 1664.42  378.01   1 0.54931-0.54931 0.78928-0.58277-0.27438 0.59885
   0  -5 -11  210.27  105.62   1-0.25669 0.25669 0.71361-0.92033-0.65180 0.29511
   0   5 -11  253.63  283.87   1 0.58144-0.58144-0.57770 0.78435-0.57286 0.21611
   0   5  11  212.91  181.73   1 0.54214-0.54214 0.80833-0.60182-0.22949 0.58641
   0   5 -12 5917.57  912.46   1 0.58363-0.58363-0.58695 0.79360-0.56111 0.17193
   0  -5 -12 7423.47  494.64   1 0.49734-0.49734-0.84448 0.63783 0.19872-0.58806
   0   5  12 6678.13  898.10   1 0.53437-0.53437 0.82415-0.61764-0.18766 0.57702
   0   5 -13 6003.91  968.06   1 0.58515-0.58515-0.59365 0.80030-0.55241 0.13080
   0  -5 -13 5468.29  473.19   1 0.51324-0.51324-0.84462 0.63796 0.15230-0.57409
   0   5  13 4505.70  540.31   1 0.52617-0.52617 0.83731-0.63080-0.14847 0.57028
   0   5 -14 1079.92  467.45   1 0.58616-0.58616-0.59827 0.80491-0.54633 0.09228
   0  -5 -14 1946.54  404.85   1 0.52674-0.52674-0.84295 0.63630 0.10938-0.56361
   0   5  14  788.75  286.00   1 0.51765-0.51765 0.84828-0.64177-0.11156 0.56582
   0   5 -15 7078.67 1020.89   1 0.58678-0.58678-0.60115 0.80780-0.54248 0.05601
   0  -5 -15 6926.86  764.78   1 0.53830-0.53830-0.83988 0.63323 0.06942-0.55609
   0   5 -16 1616.88  630.57   1 0.58708-0.58708-0.60258 0.80923-0.54057 0.02166
   0  -5 -16 2112.18  470.37   1 0.54825-0.54825-0.83569 0.62904 0.03199-0.55110
   0   5 -17  421.44  252.80   1 0.58712-0.58712-0.60277 0.80941-0.54031-0.01102
   0  -5 -17 1627.11  454.64   1 0.55686-0.55686-0.83059 0.62394-0.00329-0.54826
   0   5 -18 1130.94  438.42   1 0.58694-0.58694-0.60188 0.80852-0.54151-0.04225
   0  -5 -18  908.04  407.05   1 0.56433-0.56433-0.82473 0.61807-0.03672-0.54727
   0   5 -1910401.21 1568.04   1 0.58654-0.58654-0.60004 0.80668-0.54397-0.07222
   0  -5 -19 8931.27 1349.83   1 0.57086-0.57086-0.81819 0.61143-0.06841-0.54796
   0   5 -20  418.30  412.15   1 0.58596-0.58596-0.59735 0.80400-0.54754-0.10109
   0  -5 -20 1999.99  710.15   1 0.57649-0.57649-0.81109 0.60434-0.09888-0.54993
   0   5 -21 8245.62  820.10   1 0.58520-0.58520-0.59391 0.80055-0.55208-0.12898
   0  -5 -21 7463.57 1568.52   1 0.58136-0.58136-0.80348 0.59673-0.12815-0.55310
   0   5 -22 1006.61  389.00   1 0.58427-0.58427-0.58976 0.79641-0.55748-0.15601
   0  -5 -22  309.63  360.43   1 0.58556-0.58556-0.79539 0.58864-0.15637-0.55732
   0   5 -23  126.19  390.21   1 0.58317-0.58317-0.58498 0.79163-0.56364-0.18228
   0  -5 -23  607.02  261.58   1 0.58915-0.58916-0.78686 0.58010-0.18367-0.56246
   0   5 -24  439.19  296.21   1 0.58190-0.58190-0.57959 0.78624-0.57048-0.20787
   0  -5 -24  476.53  363.48   1 0.59219-0.59219-0.77790 0.57115-0.21016-0.56841
   0   5 -25 -650.97  346.53   1 0.58045-0.58045-0.57364 0.78028-0.57793-0.23285
   0  -5 -25  196.51  368.00   1 0.59470-0.59470-0.76854 0.56178-0.23593-0.57508
   0   6   074954.42 1439.20   1 0.24404-0.24404 0.12392 0.12392-0.96181 0.96181
   0   6   079745.13 1518.57   1 0.42493-0.42493 0.12386 0.12386-0.89671 0.89671
   0  -6   073622.37 1363.19   1 0.30554-0.30555-0.12390-0.12390-0.94407 0.94407
   0   6   111992.48  631.41   1 0.15674-0.15674 0.25102-0.00317-0.95520 0.98763
   0   6  -110444.23  420.07   1 0.32063-0.32063 0.00209 0.24575-0.94720 0.91476
   0  -6  -111323.22  812.57   1 0.32321-0.32321-0.00220-0.24564-0.94632 0.91388
   0  -6   111444.67  396.22   1 0.45199-0.45199-0.23850-0.00936-0.85954 0.89197
   0   6   111133.03  419.55   1 0.46965-0.46965 0.23722 0.01050-0.85038 0.88278
   0   6  -111497.81  893.96   1 0.37096-0.37096 0.00451 0.24330-0.92863 0.89620
   0   6   2 3365.04  577.17   1 0.06380-0.06380 0.37448-0.12663-0.92503 0.98989
   0  -6  -2 2868.37  528.82   1 0.24709-0.24709 0.11926-0.36711-0.96162 0.89675
   0   6  -2 2683.70  496.04   1 0.38390-0.38390-0.10753 0.35539-0.91708 0.85223
   0  -6   2 2357.46  320.83   1 0.49899-0.49899-0.34074 0.09285-0.79680 0.86161
   0   6   2 2476.45  440.14   1 0.50471-0.50471 0.34011-0.09228-0.79346 0.85834
   0  -6  -2 2370.49  380.55   1 0.41642-0.41642 0.10395-0.35167-0.90320 0.83839
   0   6  -2 3164.35  405.31   1 0.31057-0.31057-0.11456 0.36237-0.94362 0.87876
   0   6   3  755.15  260.94   1-0.02834 0.02834 0.48579-0.23790-0.87361 0.97087
   0  -6  -3 1213.64  216.53   1 0.16972-0.16972 0.23286-0.48071-0.95758 0.86029
   0   6  -3  855.10  303.43   1 0.43367-0.43367-0.20164 0.44951-0.87821 0.78093
   0  -6   3  476.84  158.83   1 0.53448-0.53448-0.42866 0.18078-0.72840 0.82561
   0   6   3  616.17  291.51   1 0.53002-0.53002 0.43000-0.18217-0.73086 0.82817
   0  -6  -3  819.51  335.03   1 0.45483-0.45483 0.19781-0.44554-0.86832 0.77111
   0   6   4 9055.64  555.13   1-0.11414 0.11414 0.57977-0.33171-0.80674 0.93644
   0  -6  -4 8484.21  416.40   1 0.09596-0.09596 0.33305-0.58090-0.93800 0.80829
   0   6  -4 8522.09 1283.13   1 0.47152-0.47152-0.27951 0.52740-0.83638 0.70676
   0  -6   4 9050.42  704.68   1 0.56026-0.56026-0.50242 0.25445-0.65853 0.78825
   0   6   4 9061.13 1021.40   1 0.54708-0.54708 0.50678-0.25900-0.66623 0.79600
   0  -6  -4 8454.21  421.17   1 0.48393-0.48393 0.27676-0.52459-0.83018 0.70043
   0   6   533967.22 1132.70   1-0.19029 0.19029 0.65498-0.40693-0.73128 0.89341
   0  -6  -532529.63  742.68   1 0.02954-0.02954 0.41707-0.66496-0.90839 0.74628
   0   6  -532199.24  834.96   1 0.49993-0.49993-0.34292 0.59080-0.79527 0.63325
   0  -6   533132.88 1046.88   1 0.57783-0.57783-0.56324 0.31527-0.59064 0.75280
   0   6   532797.27 1147.07   1 0.55764-0.55764 0.57124-0.32345-0.60224 0.76446
   0  -6  -529768.12  821.22   1 0.50518-0.50518 0.34165-0.58948-0.79249 0.63031
   0   6   6 3196.70  401.08   1-0.25558 0.25558 0.71269-0.46463-0.65325 0.84781
   0  -6  -6 3049.59  522.17   1-0.02802 0.02802 0.48543-0.73332-0.87382 0.67929
   0   6  -6 3994.74  750.94   1 0.52100-0.52100-0.39379 0.64167-0.75728 0.56285
   0  -6   6 3428.13  394.31   1 0.58925-0.58925-0.61318 0.36520-0.52610 0.72069
   0   6   6 3386.23  445.83   1 0.56315-0.56315 0.62500-0.37722-0.54057 0.73522
   0  -6  -6 2197.68  315.16   1 0.52061-0.52061 0.39435-0.64218-0.75726 0.56263
   0   6   711479.85  738.11   1-0.31014 0.31014 0.75582-0.50805-0.57666 0.80355
   0  -6  -7 8089.34  760.28   1-0.07646 0.07646 0.53970-0.78759-0.83837 0.61142
   0   6  -710084.59  966.98   1 0.53659-0.53659-0.43432 0.68220-0.72348 0.49665
   0  -6   7 7354.80  865.41   1 0.59605-0.59605-0.65414 0.40619-0.46562 0.69262
   0   6   711021.12  961.20   1 0.56459-0.56459 0.66986-0.42214-0.48219 0.70924
   0  -6  -7 9579.45 1314.72   1 0.53173-0.53173 0.43683-0.68466-0.72555 0.49849
   0   6   8 4767.78  871.30   1-0.35577 0.35577 0.78702-0.53925-0.50400 0.76330
   0  -6  -8 3639.82  470.62   1-0.11629 0.11629 0.58200-0.83005-0.80483 0.54541
   0   6  -8 3567.79  383.17   1 0.54832-0.54832-0.46648 0.71445-0.69407 0.43461
   0  -6   8 3310.90  449.63   1 0.59942-0.59942-0.68788 0.43993-0.40927 0.66869
   0   6   8 3478.71  506.53   1 0.56350-0.56350 0.70714-0.45942-0.42709 0.68658
   0  -6  -8 3974.97  635.04   1 0.53965-0.53965 0.47104-0.71883-0.69777 0.43823
   0  -6  -915436.27  799.27   1-0.14895 0.14895 0.61515-0.86320-0.77420 0.48236
   0   6  -916733.73 1102.98   1 0.55689-0.55689-0.49194 0.73992-0.66921 0.37733
   0   6   913873.49  958.79   1 0.56035-0.56035 0.73827-0.49055-0.37543 0.66734
   0  -6 -10 3419.31  734.50   1-0.17540 0.17540 0.64091-0.88897-0.74730 0.42303
   0   6 -10 4010.95  436.48   1 0.56327-0.56327-0.51204 0.76002-0.64847 0.32415
   0   6  10 4223.57  731.14   1 0.55568-0.55568 0.76437-0.51666-0.32701 0.65136
   0   6 -11  297.62  314.07   1 0.56803-0.56803-0.52782 0.77580-0.63145 0.27470
   0   6  11  543.48  174.70   1 0.55031-0.55031 0.78613-0.53832-0.28133 0.63825
   0   6 -12 2969.27  453.22   1 0.57157-0.57157-0.54010 0.78807-0.61773 0.22854
   0   6  12 1863.10  337.95   1 0.54369-0.54369 0.80465-0.55684-0.23858 0.62794
   0   6 -13 2827.48  566.19   1 0.57418-0.57418-0.54950 0.79747-0.60692 0.18531
   0  -6 -13 1989.33  434.67   1 0.49237-0.49237-0.84405 0.59606 0.21246-0.63424
   0   6  13 3078.84  533.65   1 0.53643-0.53643 0.82032-0.57251-0.19823 0.62004
   0   6 -14  539.72  386.02   1 0.57607-0.57607-0.55652 0.80450-0.59868 0.14463
   0  -6 -14 1184.83  365.60   1 0.50855-0.50855-0.84479 0.59681 0.16640-0.62063
   0   6  14 2078.17  435.32   1 0.52868-0.52868 0.83359-0.58578-0.16002 0.61428
   0   6 -15 1143.40  363.98   1 0.57739-0.57739-0.56155 0.80952-0.59268 0.10620
   0  -6 -15 2564.61  782.70   1 0.52246-0.52246-0.84368 0.59570 0.12338-0.61005
   0   6  15 2827.33  862.24   1 0.52054-0.52054 0.84482-0.59701-0.12371 0.61041
   0   6 -16 2705.46  443.09   1 0.57825-0.57825-0.56489 0.81286-0.58865 0.06974
   0  -6 -16 3987.44  779.57   1 0.53448-0.53448-0.84109 0.59310 0.08300-0.60211
   0   6  16 2607.42  488.04   1 0.51208-0.51208 0.85430-0.60649-0.08907 0.60822
   0   6 -17 4287.80  706.99   1 0.57873-0.57873-0.56678 0.81476-0.58635 0.03501
   0  -6 -17 5380.97 1032.65   1 0.54491-0.54491-0.83728 0.58930 0.04492-0.59648
   0   6 -18 3618.33 1610.58   1 0.57889-0.57889-0.56742 0.81539-0.58558 0.00181
   0  -6 -18  439.55  300.79   1 0.55398-0.55398-0.83247 0.58449 0.00883-0.59284
   0   6 -19  618.68  210.16   1 0.57878-0.57878-0.56695 0.81492-0.58615-0.03004
   0  -6 -19  232.36  164.83   1 0.56189-0.56189-0.82681 0.57882-0.02549-0.59095
   0   6 -20 4878.02  906.53   1 0.57841-0.57841-0.56550 0.81348-0.58791-0.06072
   0  -6 -20 4674.03 1112.99   1 0.56883-0.56883-0.82039 0.57229-0.05812-0.59068
   0   6 -21 1043.11  417.63   1 0.57781-0.57781-0.56317 0.81115-0.59072-0.09033
   0  -6 -21  308.11  330.68   1 0.57483-0.57483-0.81334 0.56524-0.08959-0.59166
   0   6 -22 1915.53  816.16   1 0.57700-0.57700-0.56005 0.80802-0.59448-0.11901
   0  -6 -22 1554.98  497.24   1 0.58004-0.58004-0.80571 0.55761-0.11987-0.59381
   0   6 -23  248.29  348.76   1 0.57598-0.57598-0.55618 0.80416-0.59908-0.14684
   0  -6 -23  309.32  351.46   1 0.58453-0.58453-0.79754 0.54944-0.14911-0.59701
   0   6 -24  171.35  339.33   1 0.57476-0.57476-0.55164 0.79962-0.60442-0.17393
   0  -6 -24  586.46  358.90   1 0.58838-0.58838-0.78887 0.54077-0.17743-0.60114
   0   6 -25  463.75  370.73   1 0.57334-0.57334-0.54646 0.79443-0.61044-0.20034
   0  -6 -25 1259.40  424.84   1 0.59162-0.59162-0.77973 0.53162-0.20492-0.60609
   0   7   0  -48.07  227.06   1 0.23038-0.23038 0.14457 0.14457-0.96229 0.96229
   0  -7   0   28.58  119.37   1 0.40400-0.40400-0.14458-0.14458-0.90325 0.90325
   0   7   0 -243.21  313.74   1 0.43355-0.43355 0.14450 0.14450-0.88946 0.88946
   0  -7   0  214.86  188.71   1 0.29429-0.29429-0.14455-0.14455-0.94471 0.94471
   0   7   141722.37  953.10   1 0.15497-0.15497 0.25348 0.03567-0.95484 0.98727
   0   7  -140181.44 1138.58   1 0.29789-0.29789 0.03941 0.24974-0.95378 0.92135
   0  -7  -141744.46 1117.04   1 0.34641-0.34641-0.04131-0.24785-0.93717 0.90474
   0  -7   141193.16  915.71   1 0.45396-0.45396-0.24254-0.04662-0.85737 0.88980
   0   7   140457.66  954.72   1 0.47142-0.47142 0.24154 0.04759-0.84818 0.88062
   0   7  -144483.26 1013.37   1 0.38928-0.38928 0.04316 0.24585-0.92010 0.88769
   0  -7  -140110.60  993.59   1 0.34849-0.34849-0.04134-0.24776-0.93639 0.90397
   0   7   2 4420.13  663.88   1 0.07484-0.07484 0.36040-0.07124-0.92978 0.99464
   0  -7  -2 4218.88  743.97   1 0.28330-0.28330 0.06282-0.35198-0.95697 0.89210
   0   7  -2 4183.20  726.07   1 0.35567-0.35567-0.05734 0.34652-0.93284 0.86799
   0  -7   2 3678.52  280.19   1 0.49511-0.49511-0.33180 0.04261-0.80297 0.86778
   0   7   2 3994.46  368.77   1 0.50190-0.50190 0.33112-0.04199-0.79902 0.86390
   0  -7  -2 3678.01  531.30   1 0.39423-0.39423 0.05394-0.34296-0.91742 0.85261
   0   7  -2 4215.85  380.49   1 0.33971-0.33971-0.05873 0.34785-0.93869 0.87383
   0   7   384305.16 1672.43   1-0.00588 0.00588 0.45963-0.17041-0.88808 0.98535
   0  -7  -382540.40 1635.61   1 0.21813-0.21813 0.16284-0.45200-0.96223 0.86493
   0   7  -379346.29 2187.39   1 0.40321-0.40321-0.14310 0.43227-0.90384 0.80657
   0  -7   383192.85 1612.69   1 0.52770-0.52770-0.41085 0.12165-0.74345 0.84067
   0   7   382235.16 1977.38   1 0.52527-0.52527 0.41160-0.12247-0.74475 0.84207
   0  -7  -384499.32 1711.77   1 0.43126-0.43126 0.13899-0.42801-0.89145 0.79423
   0   7  -383233.44 1700.05   1 0.28741-0.28741-0.15700 0.44611-0.94484 0.84756
   0   7   430921.88 1379.69   1-0.08332 0.08332 0.54715-0.25793-0.83287 0.96256
   0  -7  -430734.10  729.50   1 0.15417-0.15417 0.25459-0.54375-0.95467 0.82495
   0   7  -431966.18 1225.05   1 0.44133-0.44133-0.21687 0.50605-0.87074 0.74103
   0  -7   431714.67  797.80   1 0.55273-0.55273-0.47939 0.19009-0.68165 0.81138
   0   7   431489.77  826.56   1 0.54214-0.54214 0.48248-0.19340-0.68795 0.81772
   0  -7  -428897.58  726.16   1 0.46059-0.46059 0.21288-0.50190-0.86170 0.73208
   0   7   564849.91 1860.89   1-0.15459 0.15459 0.62073-0.33133-0.76863 0.93076
   0  -7  -565281.48 1716.87   1 0.09404-0.09404 0.33556-0.62472-0.93731 0.77516
   0   7  -564528.98 2079.22   1 0.47120-0.47120-0.27883 0.56802-0.83679 0.67476
   0  -7   564659.33 1734.00   1 0.57092-0.57092-0.53780 0.24849-0.62033 0.78249
   0   7   565086.02 1805.26   1 0.55364-0.55364 0.54389-0.25481-0.63059 0.79281
   0  -7  -566501.72 1932.66   1 0.48363-0.48363 0.27589-0.56502-0.83065 0.66846
   0   7   6 1344.47  418.03   1-0.21815 0.21815 0.68042-0.39102-0.69959 0.89415
   0  -7  -6  929.70  297.06   1 0.03975-0.03975 0.40451-0.69372-0.91366 0.71913
   0   7  -6  425.27  383.38   1 0.49454-0.49454-0.33049 0.61968-0.80386 0.60944
   0  -7   6  416.15  184.91   1 0.58370-0.58370-0.58725 0.29794-0.56073 0.75532
   0   7   6  303.54  167.13   1 0.56067-0.56067 0.59667-0.30758-0.57413 0.76879
   0  -7  -6  641.57  226.20   1 0.50115-0.50115 0.32875-0.61789-0.80047 0.60584
   0   7   7 6275.14  938.77   1-0.27325 0.27325 0.72752-0.43845-0.62931 0.85620
   0  -7  -7 5428.81  803.57   1-0.00805 0.00805 0.46219-0.75140-0.88674 0.65979
   0   7  -7 6745.39 1095.12   1 0.51260-0.51260-0.37303 0.66223-0.77336 0.54652
   0  -7   7 6008.02 1118.68   1 0.59218-0.59218-0.62895 0.33967-0.50371 0.73070
   0   7   7 6089.64  899.07   1 0.56386-0.56386 0.64191-0.35290-0.51962 0.74666
   0   7   8  380.87  145.37   1-0.32083 0.32083 0.76354-0.47447-0.56041 0.81971
   0  -7  -8  283.20  184.30   1-0.04918 0.04918 0.50950-0.79872-0.85905 0.59968
   0   7  -8 -172.68  260.60   1 0.52654-0.52654-0.40786 0.69705-0.74592 0.48668
   0   7   8  535.33  286.79   1 0.56454-0.56454 0.68045-0.39145-0.46719 0.72667
   0   7   916487.26  901.65   1-0.36145 0.36145 0.79057-0.50150-0.49431 0.78603
   0  -7  -917472.51 1098.76   1-0.08403 0.08403 0.54791-0.83713-0.83229 0.54050
   0   7  -919532.77 1480.84   1 0.53730-0.53730-0.43624 0.72544-0.72179 0.43015
   0   7   919020.23 1648.47   1 0.56305-0.56305 0.71336-0.42435-0.41722 0.70914
   0   7 -10 1392.40  288.28   1 0.54579-0.54579-0.45924 0.74854-0.70085 0.37654
   0   7  10 2197.69  525.58   1 0.55989-0.55989 0.74148-0.45248-0.36975 0.69410
   0   7 -11  506.94  242.92   1 0.55221-0.55221-0.47783 0.76714-0.68317 0.32643
   0   7  11  910.77  306.66   1 0.55542-0.55542 0.76556-0.47655-0.32467 0.68146
   0   7 -12 1343.94  276.95   1 0.55715-0.55715-0.49274 0.78205-0.66841 0.27923
   0   7  12 2142.70  494.64   1 0.55035-0.55035 0.78600-0.49689-0.28161 0.67097
   0   7 -13  768.20  384.15   1 0.56095-0.56094-0.50458 0.79388-0.65630 0.23468
   0   7  13  612.91  289.16   1 0.54408-0.54408 0.80371-0.51459-0.24088 0.66269
   0   7 -1429139.12 5354.87   1 0.56382-0.56382-0.51382 0.80313-0.64658 0.19254
   0   7  1427131.31 2058.62   1 0.53716-0.53716 0.81891-0.52980-0.20206 0.65632
   0   7 -15 3905.56  832.08   1 0.56597-0.56597-0.52088 0.81018-0.63902 0.15255
   0  -7 -15 4166.87  574.09   1 0.50636-0.50636-0.84481 0.55549 0.17289-0.65956
   0   7  15 3557.25  518.53   1 0.52973-0.52973 0.83196-0.54284-0.16498 0.65168
   0   7 -16  941.74  450.04   1 0.56751-0.56751-0.52605 0.81536-0.63339 0.11448
   0  -7 -16  424.45  210.34   1 0.52034-0.52034-0.84397 0.55465 0.13018-0.64930
   0   7  16  734.11  278.25   1 0.52188-0.52188 0.84313-0.55402-0.12946 0.64861
   0   7 -1714922.57  860.59   1 0.56856-0.56856-0.52961 0.81892-0.62947 0.07813
   0  -7 -1716433.96  758.72   1 0.53252-0.53252-0.84163 0.55231 0.08981-0.64137
   0   7  1711543.58 2218.77   1 0.51366-0.51366 0.85267-0.56356-0.09535 0.64694
   0   7 -18 1782.18  556.52   1 0.56918-0.56918-0.53176 0.82106-0.62710 0.04333
   0  -7 -18  879.49  374.39   1 0.54317-0.54317-0.83803 0.54872 0.05149-0.63550
   0   7 -19 1475.70  594.50   1 0.56944-0.56944-0.53266 0.82196-0.62609 0.00989
   0  -7 -19  409.88  319.60   1 0.55249-0.55249-0.83338 0.54406 0.01501-0.63146
   0   7 -20  916.19  538.76   1 0.56938-0.56938-0.53246 0.82176-0.62632-0.02231
   0  -7 -20 2606.49  541.48   1 0.56064-0.56064-0.82781 0.53850-0.01985-0.62903
   0   7 -21 8682.72  687.02   1 0.56904-0.56904-0.53126 0.82057-0.62765-0.05341
   0  -7 -2111535.94 2918.20   1 0.56781-0.56781-0.82143 0.53198-0.05310-0.62815
   0   7 -22 -114.41  339.74   1 0.56843-0.56843-0.52917 0.81847-0.62996-0.08353
   0  -7 -22 1083.13  299.99   1 0.57404-0.57404-0.81437 0.52491-0.08525-0.62843
   0   7 -23 1368.84  505.20   1 0.56757-0.56757-0.52625 0.81556-0.63317-0.11275
   0  -7 -23 2140.15  397.34   1 0.57945-0.57945-0.80666 0.51721-0.11627-0.62986
   0   7 -24  758.21  301.07   1 0.56648-0.56648-0.52258 0.81189-0.63718-0.14117
   0  -7 -24 -238.25  346.56   1 0.58412-0.58412-0.79837 0.50892-0.14628-0.63229
   0   8   0 2057.82  427.01   1 0.21652-0.21652 0.16523 0.16523-0.96219 0.96219
   0  -8   0 1440.21  236.52   1 0.41492-0.41492-0.16524-0.16524-0.89472 0.89472
   0   8   0 1928.38  274.48   1 0.44196-0.44196 0.16515 0.16515-0.88169 0.88169
   0  -8   0  978.27  283.20   1 0.28284-0.28284-0.16520-0.16520-0.94483 0.94483
   0   8   1  777.14  259.18   1 0.14997-0.14997 0.26042 0.07004-0.95377 0.98620
   0   8  -1 1160.59  274.96   1 0.27701-0.27701 0.07278 0.25767-0.95810 0.92566
   0  -8  -1 1146.90  199.05   1 0.36620-0.36620-0.07583-0.25464-0.92743 0.89501
   0  -8   1  350.61  220.28   1 0.45778-0.45778-0.25048-0.08002-0.85305 0.88545
   0   8   1  508.47  277.56   1 0.47437-0.47437 0.24968 0.08075-0.84417 0.87661
   0   8  -1 1033.13  317.13   1 0.40476-0.40476 0.07735 0.25295-0.91114 0.87873
   0  -8  -1  656.57  176.48   1 0.33163-0.33163-0.07450-0.25591-0.94046 0.90803
   0   8   2 3340.17  557.33   1 0.07948-0.07948 0.35445-0.02398-0.93168 0.99654
   0  -8  -2 3147.58  244.60   1 0.31295-0.31295 0.01481-0.34527-0.94965 0.88478
   0   8  -2 2927.71  439.14   1 0.33005-0.33005-0.01367 0.34414-0.94386 0.87899
   0  -8   2 2408.31  260.89   1 0.49405-0.49405-0.32938-0.00112-0.80461 0.86942
   0   8   2 3507.65  396.61   1 0.50115-0.50115 0.32874 0.00169-0.80048 0.86535
   0   8  -2 3241.99  386.56   1 0.36333-0.36333-0.01128 0.34169-0.93158 0.86673
   0  -8  -2 2535.79  680.26   1 0.37396-0.37396 0.01045-0.34075-0.92738 0.86257
   0   8   315880.97  829.18   1 0.00784-0.00784 0.44333-0.11280-0.89632 0.99358
   0  -8  -316170.88 1046.01   1 0.25747-0.25747 0.10332-0.43378-0.96074 0.86344
   0   8  -316013.90  753.85   1 0.37525-0.37525-0.09193 0.42241-0.92235 0.82507
   0  -8   315526.95  648.53   1 0.52373-0.52373-0.40067 0.07016-0.75177 0.84898
   0   8   317545.53 1647.68   1 0.52246-0.52246 0.40113-0.07069-0.75241 0.84972
   0  -8  -315002.48  563.61   1 0.40939-0.40939 0.08781-0.41812-0.90812 0.81090
   0   8  -319234.78 1838.67   1 0.31938-0.31938-0.09798 0.42839-0.94254 0.84526
   0   8   435182.29 1645.98   1-0.06216 0.06216 0.52399-0.19346-0.84945 0.97913
   0  -8  -432829.97 1260.94   1 0.20185-0.20185 0.18675-0.51721-0.96144 0.83170
   0   8  -434792.13 1076.16   1 0.41277-0.41277-0.16113 0.49162-0.89646 0.76676
   0  -8   431747.82  971.44   1 0.54746-0.54746-0.46400 0.13337-0.69640 0.82613
   0   8   430341.95 1113.12   1 0.53860-0.53860 0.46631-0.13593-0.70175 0.83152
   0  -8  -432812.16 1096.57   1 0.43853-0.43853 0.15668-0.48699-0.88494 0.75532
   0   8  -434993.98 1079.33   1 0.27442-0.27442-0.18014 0.51056-0.94458 0.81487
   0   8   5 2742.94  412.80   1-0.12825 0.12825 0.59430-0.26356-0.79394 0.95607
   0  -8  -5 2102.91  432.29   1 0.14825-0.14825 0.26278-0.59324-0.95339 0.79124
   0   8  -5 1926.01  312.84   1 0.44343-0.44343-0.22110 0.55159-0.86860 0.70647
   0  -8   5 2236.97  370.09   1 0.56550-0.56550-0.51931 0.18868-0.64071 0.80287
   0   8   5 2891.97  490.97   1 0.55030-0.55030 0.52413-0.19374-0.64996 0.81217
   0  -8  -5 2471.42  287.26   1 0.46211-0.46211 0.21690-0.54721-0.85988 0.69785
   0   8   6 2173.82  366.82   1-0.18889 0.18889 0.65367-0.32293-0.73282 0.92737
   0  -8  -6  928.70  173.28   1 0.09811-0.09811 0.33023-0.66070-0.93878 0.74420
   0   8  -6  569.95  255.95   1 0.46807-0.46807-0.27213 0.60264-0.84074 0.64631
   0   8   6 1441.82  350.75   1 0.55813-0.55813 0.57499-0.24460-0.59821 0.79287
   0   8   7 4284.03  612.20   1-0.24329 0.24329 0.70235-0.37161-0.66895 0.89593
   0  -8  -7 4024.72  746.51   1 0.05253-0.05253 0.38868-0.71915-0.91987 0.69286
   0   8  -7 5203.08  685.68   1 0.48791-0.48791-0.31548 0.64599-0.81388 0.58705
   0   8   7 4902.08  659.87   1 0.56274-0.56274 0.61946-0.28908-0.54733 0.77443
   0   8   8  473.82  176.31   1-0.29102 0.29102 0.74147-0.41111-0.60457 0.86388
   0  -8  -8 1029.70  227.75   1 0.01208-0.01208 0.43825-0.76877-0.89877 0.63940
   0   8  -8  113.71  262.72   1 0.50375-0.50375-0.35187 0.68239-0.78892 0.52969
   0   8   8  970.95  315.19   1 0.56443-0.56443 0.65832-0.32803-0.49801 0.75749
   0   8   911645.10 1243.72   1-0.33300 0.33300 0.77202-0.44165-0.54138 0.83309
   0  -8  -9 9966.40 1156.72   1-0.02338 0.02338 0.48008-0.81060-0.87691 0.58511
   0   8  -910087.01  681.10   1 0.51637-0.51637-0.38226 0.71277-0.76631 0.47466
   0   8   9 9596.75 1206.87   1 0.56425-0.56425 0.69204-0.36175-0.45020 0.74212
   0   8  10 2333.10  460.91   1-0.36948 0.36948 0.79545-0.46509-0.48034 0.80446
   0   8 -10 1558.49  329.81   1 0.52640-0.52640-0.40750 0.73801-0.74621 0.42216
   0   8  10 2380.58  540.73   1 0.56235-0.56235 0.72136-0.39106-0.40422 0.72857
   0   8 -11 1944.53  545.32   1 0.53437-0.53437-0.42837 0.75888-0.72865 0.37219
   0   8  11 1407.04  415.91   1 0.55905-0.55905 0.74684-0.41655-0.36011 0.71689
   0   8 -12 1383.81  532.99   1 0.54069-0.54069-0.44551 0.77602-0.71355 0.32469
   0   8  12 1912.45  626.13   1 0.55462-0.55462 0.76901-0.43872-0.31782 0.70704
   0   8 -13 2343.73  619.51   1 0.54584-0.54584-0.45939 0.79003-0.70071 0.27910
   0   8  13  662.01  276.93   1 0.54969-0.54969 0.78809-0.45768-0.27701 0.69882
   0   8 -14 4230.74  851.27   1 0.54975-0.54975-0.47063 0.80126-0.69012 0.23607
   0   8  14 3692.40  614.65   1 0.54361-0.54361 0.80484-0.47442-0.23812 0.69238
   0   8 -15 2780.48  580.75   1 0.55278-0.55278-0.47954 0.81017-0.68151 0.19504
   0   8  15 2011.62  506.59   1 0.53692-0.53692 0.81939-0.48898-0.20076 0.68746
   0   8 -16 7868.88  664.34   1 0.55508-0.55508-0.48643 0.81706-0.67473 0.15582
   0  -8 -16 7133.44 1357.43   1 0.50624-0.50624-0.84481 0.51416 0.17323-0.69235
   0   8  16 6617.97  920.90   1 0.52970-0.52970 0.83201-0.50160-0.16481 0.68396
   0   8 -17 1711.86  496.82   1 0.55677-0.55677-0.49156 0.82220-0.66959 0.11825
   0  -8 -17 2836.54  505.88   1 0.52006-0.52006-0.84400 0.51336 0.13107-0.68263
   0   8  17 1114.87  455.72   1 0.52204-0.52204 0.84292-0.51251-0.13016 0.68176
   0   8 -1810757.69 1689.27   1 0.55794-0.55794-0.49516 0.82579-0.66596 0.08219
   0  -8 -18 9573.85  589.93   1 0.53219-0.53219-0.84172 0.51107 0.09095-0.67495
   0   8  18 8592.24 1868.54   1 0.51400-0.51400 0.85231-0.52190-0.09669 0.68074
   0   8 -19 3103.83  756.03   1 0.55866-0.55866-0.49740 0.82803-0.66369 0.04749
   0  -8 -19 5154.48  612.00   1 0.54286-0.54286-0.83816 0.50752 0.05266-0.66911
   0   8 -20  601.28  327.28   1 0.55899-0.55899-0.49842 0.82905-0.66265 0.01401
   0  -8 -20  560.89  333.31   1 0.55223-0.55223-0.83353 0.50288 0.01604-0.66493
   0   8 -21   75.12  212.27   1 0.55896-0.55896-0.49835 0.82898-0.66272-0.01834
   0  -8 -21 2010.81  618.01   1 0.56047-0.56047-0.82794 0.49730-0.01910-0.66223
   0   8 -22 1178.87  362.38   1 0.55862-0.55862-0.49729 0.82792-0.66380-0.04969
   0  -8 -22  635.36  370.96   1 0.56774-0.56774-0.82151 0.49070-0.05273-0.66096
   0   8 -23  263.85  388.86   1 0.55799-0.55799-0.49533 0.82596-0.66579-0.08013
   0  -8 -23  454.36  318.16   1 0.57406-0.57406-0.81435 0.48354-0.08535-0.66078
   0   8 -24 1882.15  714.94   1 0.55708-0.55708-0.49253 0.82317-0.66862-0.10973
   0  -8 -24 1031.58  344.94   1 0.57955-0.57955-0.80650 0.47570-0.11689-0.66168
   0   9   0  172.85  259.58   1 0.20245-0.20245 0.18588 0.18588-0.96148 0.96148
   0  -9   0  343.42  274.19   1 0.42564-0.42564-0.18589-0.18589-0.88558 0.88558
   0   9   0  693.94  353.05   1 0.45016-0.45016 0.18579 0.18579-0.87340 0.87340
   0  -9   0  167.33  112.67   1 0.27117-0.27117-0.18585-0.18585-0.94441 0.94441
   0   9   1  597.64  237.11   1 0.14275-0.14275 0.27035 0.10142-0.95211 0.98454
   0   9  -1  547.14  161.89   1 0.25737-0.25737 0.10348 0.26829-0.96075 0.92832
   0  -9  -1  756.42  175.39   1 0.38379-0.38379-0.10732-0.26447-0.91716 0.88473
   0  -9   1  727.89  227.41   1 0.46288-0.46288-0.26114-0.11067-0.84707 0.87948
   0   9   1  899.10  286.52   1 0.47823-0.47823 0.26047 0.11127-0.83871 0.87115
   0   9  -1 1225.95  243.56   1 0.41841-0.41841 0.10857 0.26302-0.90174 0.86933
   0  -9  -1 1035.96  181.55   1 0.31566-0.31566-0.10500-0.26671-0.94304 0.91061
   0   9   2  916.97  293.60   1 0.07975-0.07975 0.35410 0.01766-0.93179 0.99665
   0   9  -2  464.57  224.01   1 0.30643-0.30643 0.02551 0.34625-0.95154 0.88668
   0  -9  -2  537.16  189.53   1 0.33817-0.33817-0.02741-0.34436-0.94068 0.87581
   0  -9   2  391.06  195.57   1 0.49500-0.49500-0.33155-0.04027-0.80314 0.86795
   0   9   2  686.52  361.04   1 0.50186-0.50186 0.33099 0.04075-0.79911 0.86398
   0   9  -2  510.87  145.75   1 0.38339-0.38339 0.03045 0.34113-0.92308 0.85827
   0  -9  -2  250.53  184.85   1 0.35490-0.35490-0.02847-0.34324-0.93447 0.86961
   0   9   3 1029.77  207.31   1 0.01541-0.01541 0.43423-0.06238-0.90066 0.99793
   0  -9  -3  293.34  241.42   1 0.29041-0.29041 0.05146-0.42323-0.95551 0.85821
   0   9  -3  745.95  195.86   1 0.34926-0.34926-0.04624 0.41803-0.93588 0.83860
   0  -9   3  293.71  216.06   1 0.52193-0.52193-0.39612 0.02430-0.75542 0.85263
   0   9   3  936.86  417.66   1 0.52118-0.52118 0.39645-0.02470-0.75577 0.85308
   0  -9  -3  564.51  149.96   1 0.38887-0.38887 0.04225-0.41385-0.92032 0.82310
   0   9  -3 1066.02  315.23   1 0.34582-0.34582-0.04667 0.41838-0.93713 0.83985
   0   9   4  125.90  117.64   1-0.04819 0.04819 0.50839-0.13654-0.85977 0.98946
   0  -9  -4  159.00  184.80   1 0.24192-0.24192 0.12715-0.49893-0.96192 0.83219
   0   9  -4  132.59  232.26   1 0.38580-0.38580-0.11098 0.48278-0.91587 0.78617
   0  -9   4  604.94  243.88   1 0.54413-0.54413-0.45455 0.08258-0.70519 0.83492
   0   9   4  418.94  179.13   1 0.53632-0.53632 0.45638-0.08469-0.70998 0.83975
   0   9  -4  669.55  222.30   1 0.30717-0.30717-0.12089 0.49261-0.94394 0.81423
   0   9   5  539.93  210.22   1-0.10932 0.10932 0.57474-0.20266-0.81099 0.97312
   0  -9  -5  822.83  195.70   1 0.19429-0.19429 0.19779-0.56957-0.96079 0.79864
   0   9  -5 1324.40  672.08   1 0.41654-0.41654-0.16833 0.54013-0.89339 0.73126
   0   9   5 1008.45  355.98   1 0.54779-0.54779 0.51050-0.13882-0.66280 0.82501
   0   9  -5 1190.04  258.19   1 0.26843-0.26843-0.19064 0.56236-0.94424 0.78210
   0   9   6 1364.38  301.15   1-0.16660 0.16660 0.63245-0.26037-0.75646 0.95102
   0  -9  -6  880.27  200.22   1 0.14866-0.14866 0.26222-0.63399-0.95348 0.75891
   0   9  -6 1789.01  358.87   1 0.44210-0.44210-0.21843 0.59023-0.86995 0.67540
   0   9   6 1614.78  311.68   1 0.55594-0.55594 0.55899-0.18731-0.61518 0.80983
   0   9   716371.25  852.90   1-0.21916 0.21916 0.68132-0.30924-0.69839 0.92538
   0  -9  -716393.31  760.04   1 0.10609-0.10609 0.31972-0.69149-0.94155 0.71454
   0   9  -715856.81 1380.63   1 0.46306-0.46306-0.26152 0.63335-0.84686 0.62002
   0   9   714819.54 1651.46   1 0.56122-0.56122 0.60215-0.23047-0.56782 0.79492
   0   9   8  428.11  217.74   1-0.26629 0.26629 0.72190-0.35024-0.63870 0.89800
   0   9  -8  -14.50  297.64   1 0.48034-0.48034-0.29867 0.67049-0.82465 0.56542
   0   9   8  704.90  267.13   1 0.56379-0.56379 0.64051-0.26893-0.52142 0.78090
   0   9   9 2186.34  425.50   1-0.30862 0.30862 0.75471-0.38305-0.57893 0.87064
   0   9  -9 3108.80  518.28   1 0.49446-0.49446-0.33032 0.70214-0.80398 0.51234
   0   9   9 2737.60  602.02   1 0.56459-0.56459 0.67434-0.30276-0.47591 0.76783
   0   9  10 4798.71  905.83   1-0.34610 0.34610 0.78079-0.40914-0.52015 0.84428
   0   9 -10 6064.98  548.20   1 0.50597-0.50597-0.35713 0.72895-0.78513 0.46108
   0   9  10 5896.94  841.32   1 0.56368-0.56368 0.70419-0.33261-0.43170 0.75605
   0   9  11 2512.81  522.42   1-0.37914 0.37914 0.80111-0.42945-0.46310 0.81964
   0   9 -11 3740.94  533.49   1 0.51534-0.51534-0.37973 0.75155-0.76826 0.41180
   0   9  11 2670.56  604.09   1 0.56136-0.56136 0.73049-0.35892-0.38889 0.74568
   0   9 -12 2570.06  517.14   1 0.52293-0.52293-0.39866 0.77048-0.75339 0.36453
   0   9  12 2019.76  403.81   1 0.55785-0.55785 0.75367-0.38209-0.34752 0.73674
   0   9 -13 3850.43  628.63   1 0.52907-0.52907-0.41440 0.78623-0.74050 0.31923
   0   9  13 2923.09  779.44   1 0.55377-0.55377 0.77389-0.40217-0.30729 0.72910
   0   9 -14   77.73  232.88   1 0.53401-0.53401-0.42739 0.79921-0.72949 0.27583
   0   9  14  729.99  304.85   1 0.54847-0.54847 0.79180-0.42009-0.26871 0.72297
   0   9 -15  895.81  334.63   1 0.53794-0.53794-0.43796 0.80979-0.72027 0.23420
   0   9  15  906.36  250.38   1 0.54248-0.54248 0.80754-0.43583-0.23145 0.71816
   0   9 -16  787.23  358.20   1 0.54103-0.54103-0.44643 0.81826-0.71272 0.19424
   0  -9 -16 1745.16  469.55   1 0.49254-0.49254-0.84406 0.47209 0.21199-0.73111
   0   9  16  667.20  259.04   1 0.53589-0.53589 0.82134-0.44963-0.19544 0.71459
   0   9 -17  227.61  370.59   1 0.54354-0.54354-0.45291 0.82487-0.70670 0.15536
   0  -9 -17  883.47  400.93   1 0.50784-0.50784-0.84480 0.47282 0.16853-0.72009
   0   9  17 1828.08  483.66   1 0.52880-0.52880 0.83341-0.46169-0.16058 0.71218
   0   9  18  732.19  429.68   1 0.52126-0.52126 0.84392-0.47220-0.12680 0.71084
   0   9 -19 1275.62  405.14   1 0.54654-0.54654-0.46137 0.83333-0.69887 0.08266
   0  -9 -19 2002.51  502.46   1 0.53325-0.53325-0.84143 0.46946 0.08728-0.70373
   0   9  19 1409.86  414.12   1 0.51333-0.51333 0.85302-0.48130-0.09402 0.71051
   0   9 -20 1034.72  394.18   1 0.54731-0.54731-0.46357 0.83553-0.69681 0.04817
   0  -9 -20  671.15  317.14   1 0.54378-0.54378-0.83777 0.46580 0.04919-0.69808
   0   9 -21  622.62  362.04   1 0.54767-0.54767-0.46460 0.83656-0.69584 0.01478
   0  -9 -21  357.49  228.15   1 0.55308-0.55308-0.83303 0.46105 0.01258-0.69392
   0   9 -22 1047.69  380.72   1 0.54765-0.54765-0.46455 0.83651-0.69588-0.01760
   0  -9 -22  938.69  541.11   1 0.56127-0.56127-0.82731 0.45534-0.02267-0.69111
   0   9 -23  421.82  374.01   1 0.54729-0.54729-0.46353 0.83549-0.69685-0.04908
   0  -9 -23  649.45  209.90   1 0.56850-0.56850-0.82073 0.44857-0.05651-0.68961
   0  10   0  986.72  160.93   1 0.18822-0.18822 0.20654 0.20654-0.96016 0.96016
   0 -10   0  390.39  150.54   1 0.43615-0.43615-0.20655-0.20655-0.87584 0.87584
   0  10   0  380.39  393.40   1 0.45815-0.45815 0.20644 0.20644-0.86456 0.86456
   0  10   1  980.76  254.15   1 0.13394-0.13394 0.28238 0.13069-0.94990 0.98233
   0  10  -1  765.21  188.73   1 0.23854-0.23854 0.13227 0.28080-0.96208 0.92964
   0 -10  -1 1312.05  220.28   1 0.39977-0.39977-0.13668-0.27642-0.90636 0.87394
   0 -10   1 1625.99  243.93   1 0.46881-0.46881-0.27371-0.13942-0.83981 0.87222
   0  10   1 1949.01  355.13   1 0.48268-0.48268 0.27314 0.13990-0.83211 0.86454
   0  10  -1 1125.06  233.71   1 0.43073-0.43073 0.13771 0.27517-0.89190 0.85950
   0  10   2 9054.40 1013.91   1 0.07691-0.07691 0.35775 0.05532-0.93064 0.99550
   0  10  -2 8180.94 1187.40   1 0.28420-0.28420 0.06138 0.35169-0.95679 0.89192
   0 -10  -2 6767.76  793.36   1 0.36037-0.36037-0.06556-0.34753-0.93049 0.86564
   0  10   2 8108.21  818.19   1 0.50361-0.50361 0.33658 0.07645-0.79566 0.86053
   0  10  -210028.20 1123.23   1 0.40063-0.40063 0.06810 0.34477-0.91370 0.84889
   0  10   3 3065.47  589.15   1 0.01853-0.01853 0.43047-0.01731-0.90241 0.99967
   0 -10  -3 3118.35  294.71   1 0.31872-0.31872 0.00526-0.41834-0.94783 0.85052
   0  10  -3 3923.45  812.99   1 0.32475-0.32475-0.00478 0.41786-0.94578 0.84848
   0  10   3 4430.33  613.09   1 0.52109-0.52109 0.39610 0.01694-0.75601 0.85333
   0  10  -3 2657.61  358.18   1 0.36830-0.36830-0.00101 0.41403-0.92970 0.83242
   0  10   4 2642.48  459.23   1-0.03963 0.03963 0.49871-0.08555-0.86585 0.99554
   0 -10  -4 1492.46  305.56   1 0.27622-0.27622 0.07403-0.48712-0.95823 0.82849
   0  10  -4 2281.75  398.25   1 0.36020-0.36020-0.06526 0.47836-0.93058 0.80088
   0  10   4 1579.53  347.64   1 0.53521-0.53521 0.45122-0.03817-0.71410 0.84385
   0  10  -4 1703.83  292.45   1 0.33484-0.33484-0.06826 0.48128-0.93979 0.81008
   0  10   5  569.74  209.23   1-0.09622 0.09622 0.56098-0.14782-0.82221 0.98432
   0 -10  -5  401.72  179.08   1 0.23383-0.23383 0.13938-0.55246-0.96223 0.80006
   0  10  -5  790.10  256.14   1 0.39065-0.39065-0.11983 0.53294-0.91270 0.75057
   0  10   5  625.04  314.18   1 0.54611-0.54611 0.50181-0.08883-0.67077 0.83298
   0  10  -5 1143.98  350.97   1 0.30094-0.30094-0.13240 0.54542-0.94440 0.78226
   0  10   6 7195.41 1059.88   1-0.15011 0.15011 0.61630-0.20287-0.77307 0.96763
   0  10  -6 7028.27 1033.18   1 0.41656-0.41656-0.16837 0.58148-0.89337 0.69882
   0  10   6 5992.70  859.62   1 0.55425-0.55425 0.54775-0.13477-0.62670 0.82136
   0  10  -6 7741.28  781.72   1 0.26740-0.26740-0.19244 0.60546-0.94417 0.74960
   0  10   714041.99  869.87   1-0.20040 0.20040 0.66435-0.25092-0.72004 0.94703
   0  10  -716672.90 1447.97   1 0.43844-0.43844-0.21109 0.62420-0.87361 0.64663
   0  10   716732.35 2445.91   1 0.55986-0.55986 0.58925-0.17627-0.58251 0.80961
   0  10   8  601.11  293.14   1-0.24664 0.24664 0.70519-0.29176-0.66473 0.92414
   0  10  -8   73.43  300.98   1 0.45678-0.45678-0.24838 0.66149-0.85419 0.59478
   0  10   8  493.97  374.54   1 0.56326-0.56326 0.62656-0.21358-0.53865 0.79819
   0  10   9  824.60  312.89   1-0.28826 0.28826 0.73935-0.32639-0.60848 0.90020
   0  10  -9  998.45  330.95   1 0.47198-0.47198-0.28049 0.69363-0.83579 0.54415
   0  10   9  514.98  241.27   1 0.56447-0.56447 0.66007-0.24721-0.49564 0.78756
   0  10  10  348.06  211.58   1-0.32604 0.32604 0.76721-0.35425-0.55234 0.87646
   0  10 -10  175.09  299.23   1 0.48472-0.48472-0.30835 0.72149-0.81851 0.49446
   0  10  10  398.56  271.71   1 0.56432-0.56432 0.68996-0.27709-0.45330 0.77765
   0  10  11  445.92  296.64   1-0.35983 0.35983 0.78957-0.37661-0.49708 0.85362
   0  10 -11  758.87  567.45   1 0.49529-0.49529-0.33221 0.74535-0.80269 0.44624
   0  10  11  743.73  346.84   1 0.56278-0.56278 0.71661-0.30375-0.41198 0.76876
   0  10 -12 3077.95  619.73   1 0.50403-0.50403-0.35254 0.76568-0.78845 0.39959
   0  10  12 4369.82  694.89   1 0.56005-0.56005 0.74036-0.32749-0.37175 0.76097
   0  10 -13 9129.70 1382.01   1 0.51124-0.51124-0.36974 0.78288-0.77583 0.35457
   0  10  13 8794.78 1258.08   1 0.55631-0.55631 0.76148-0.34862-0.33264 0.75430
   0  10 -14  633.55  523.66   1 0.51715-0.51715-0.38419 0.79733-0.76481 0.31115
   0  10  14  884.36  340.45   1 0.55210-0.55210 0.78008-0.36706-0.29437 0.74862
   0  10 -15 6786.92 1097.74   1 0.52196-0.52196-0.39620 0.80934-0.75536 0.26929
   0  10  15 5570.69 1037.70   1 0.54676-0.54676 0.79671-0.38369-0.25749 0.74419
   0  10 -16 2640.01  462.48   1 0.52584-0.52584-0.40605 0.81919-0.74739 0.22892
   0  10  16 2030.66  345.00   1 0.54077-0.54077 0.81143-0.39841-0.22167 0.74083
   0  10 -17 6782.68 1348.86   1 0.52891-0.52891-0.41400 0.82713-0.74084 0.18996
   0 -10 -17 5649.11 1557.64   1 0.49613-0.49613-0.84439 0.43108 0.20210-0.75366
   0  10  17 6781.41 1286.69   1 0.53422-0.53422 0.82442-0.41141-0.18687 0.73847
   0  10 -18  650.41  376.02   1 0.53130-0.53130-0.42023 0.83337-0.73560 0.15231
   0 -10 -18  415.41  315.41   1 0.51084-0.51084-0.84473 0.43142 0.15957-0.74357
   0  10 -19  867.73  246.43   1 0.53308-0.53308-0.42494 0.83808-0.73160 0.11590
   0 -10 -19 1066.70  415.72   1 0.52390-0.52390-0.84346 0.43015 0.11873-0.73518
   0  10  19  744.26  375.03   1 0.51969-0.51969 0.84587-0.43285-0.12009 0.73658
   0  10 -20 1037.53  447.10   1 0.53434-0.53434-0.42827 0.84141-0.72873 0.08064
   0 -10 -20  854.79  298.43   1 0.53549-0.53549-0.84079 0.42748 0.07946-0.72835
   0  10  20 1059.43  307.51   1 0.51181-0.51181 0.85457-0.44156-0.08799 0.73693
   0  10 -21 2251.28  879.57   1 0.53512-0.53512-0.43035 0.84349-0.72693 0.04643
   0 -10 -21 3536.10  935.87   1 0.54577-0.54577-0.83689 0.42359 0.04164-0.72298
   0  10 -22 1553.09  536.21   1 0.53547-0.53547-0.43130 0.84444-0.72611 0.01320
   0 -10 -22  876.05  448.64   1 0.55486-0.55486-0.83192 0.41861 0.00516-0.71894
   0  10 -23  891.10  202.05   1 0.53544-0.53544-0.43121 0.84435-0.72619-0.01911
   0 -10 -23  726.77  349.33   1 0.56290-0.56290-0.82597 0.41266-0.03009-0.71613
   0  11   0  403.61  303.10   1 0.17373-0.17373 0.22719 0.22719-0.95822 0.95822
   0  11   0  233.24  268.81   1 0.46592-0.46592 0.22708 0.22708-0.85518 0.85518
   0  11   1 5265.98 1181.01   1 0.12391-0.12391 0.29594 0.15844-0.94713 0.97956
   0  11  -1 6800.89  465.88   1 0.22027-0.22027 0.15966 0.29472-0.96228 0.92984
   0  11   1 5896.87 1125.66   1 0.48751-0.48751 0.28720 0.16715-0.82452 0.85696
   0  11  -1 7026.80  688.41   1 0.44203-0.44203 0.16533 0.28883-0.88162 0.84922
   0  11   2 2984.38  555.14   1 0.07176-0.07176 0.36435 0.09003-0.92849 0.99334
   0  11  -2 3292.20  525.08   1 0.26300-0.26300 0.09475 0.35963-0.96013 0.89526
   0  11   2 2763.47  463.32   1 0.50612-0.50612 0.34469 0.10965-0.79058 0.85546
   0  11  -2 3528.74  521.71   1 0.41591-0.41591 0.10276 0.35140-0.90357 0.83876
   0  11   3 6226.64 1114.31   1 0.01830-0.01830 0.43074 0.02372-0.90228 0.99955
   0  11  -3 6906.22 1326.95   1 0.30149-0.30149 0.03356 0.42082-0.95287 0.85557
   0  11   3 7292.78 1129.53   1 0.52190-0.52190 0.39906 0.05528-0.75389 0.85121
   0  11  -3 8281.83 1242.59   1 0.38801-0.38801 0.04040 0.41376-0.92076 0.82355
   0  11   4 3688.08  739.82   1-0.03522 0.03522 0.49368-0.03921-0.86892 0.99860
   0  11  -4 2434.40  415.88   1 0.33566-0.33566-0.02315 0.47754-0.94169 0.81196
   0  11   4 3723.25  588.47   1 0.53491-0.53491 0.44992 0.00442-0.71514 0.84489
   0  11  -4 3380.03  592.85   1 0.35870-0.35870-0.02076 0.47508-0.93322 0.80351
   0  11   5  604.11  262.45   1-0.08776 0.08776 0.55193-0.09745-0.82925 0.99136
   0  11  -5 -211.48  301.25   1 0.36566-0.36566-0.07487 0.52928-0.92773 0.76560
   0  11   5  495.03  256.44   1 0.54517-0.54517 0.49713-0.04285-0.67501 0.83722
   0  11  -5  378.95  179.82   1 0.32893-0.32893-0.07972 0.53404-0.94098 0.77884
   0  11   6 6048.89  619.41   1-0.13839 0.13839 0.60459-0.14982-0.78442 0.97897
   0  11  -6 5596.94  767.61   1 0.39162-0.39162-0.12162 0.57604-0.91204 0.71749
   0  11   6 5645.80  816.96   1 0.55309-0.55309 0.54050-0.08622-0.63398 0.82864
   0  11  -6 4764.01  641.89   1 0.29916-0.29916-0.13566 0.58998-0.94450 0.74994
   0  11   7  225.16  174.15   1-0.18627 0.18627 0.65122-0.19645-0.73567 0.96265
   0  11  -7  745.42  220.36   1 0.41396-0.41396-0.16340 0.61782-0.89550 0.66852
   0  11   7  594.76  289.83   1 0.55878-0.55878 0.58015-0.12587-0.59260 0.81970
   0  11  -7  -18.74  167.97   1 0.26997-0.26997-0.18795 0.64227-0.94434 0.71735
   0  11   818249.94  810.50   1-0.23093 0.23093 0.69169-0.23692-0.68427 0.94368
   0  11  -815706.63  635.66   1 0.43305-0.43305-0.20041 0.65483-0.87880 0.61939
   0  11   814722.51 2022.79   1 0.56249-0.56249 0.61622-0.16194-0.55124 0.81078
   0  11   917809.56  916.95   1-0.27170 0.27170 0.72628-0.27203-0.63141 0.92313
   0  11  -920359.64 1684.75   1 0.44929-0.44929-0.23297 0.68739-0.86247 0.57064
   0  11   917211.75 2492.85   1 0.56415-0.56415 0.64898-0.19483-0.51043 0.80234
   0  11  1012174.13  931.77   1-0.30925 0.30925 0.75517-0.30093-0.57798 0.90210
   0  11 -1012815.86 1619.60   1 0.46291-0.46291-0.26122 0.71567-0.84703 0.52298
   0  11  1013448.52 2256.63   1 0.56456-0.56456 0.67853-0.22438-0.46994 0.79430
   0  11  11 2499.05  770.92   1-0.34329 0.34329 0.77894-0.32469-0.52477 0.88131
   0  11 -11 3694.77  619.13   1 0.47451-0.47451-0.28596 0.74041-0.83250 0.47605
   0  11  11 2712.89  569.18   1 0.56362-0.56362 0.70517-0.25102-0.43017 0.78696
   0  11  12  129.77  157.70   1-0.37397 0.37397 0.79812-0.34387-0.47237 0.86133
   0  11 -12  531.14  166.41   1 0.48426-0.48426-0.30733 0.76178-0.81916 0.43030
   0  11  12 1035.74  255.01   1 0.56152-0.56152 0.72914-0.27499-0.39120 0.78043
   0  11 -13  718.53  407.42   1 0.49243-0.49243-0.32569 0.78014-0.80711 0.38584
   0  11  13  503.44  254.73   1 0.55840-0.55840 0.75066-0.29651-0.35311 0.77476
   0  11 -14 8248.08  823.74   1 0.49925-0.49925-0.34134 0.79579-0.79638 0.34272
   0  11  14 7169.32 1135.20   1 0.55439-0.55439 0.76996-0.31581-0.31591 0.77000
   0  11 -15  414.90  405.53   1 0.50489-0.50489-0.35457 0.80902-0.78699 0.30091
   0  11  15  375.08  361.54   1 0.55002-0.55002 0.78706-0.33274-0.27929 0.76600
   0  11 -16 1413.33  480.98   1 0.50954-0.50954-0.36564 0.82009-0.77889 0.26041
   0  11  16  753.61  268.60   1 0.54457-0.54457 0.80246-0.34814-0.24388 0.76303
   0  11 -17 2533.72  541.92   1 0.51331-0.51331-0.37476 0.82921-0.77205 0.22117
   0  11  17 1248.50  588.39   1 0.53853-0.53853 0.81618-0.36186-0.20934 0.76094
   0  11 -18  798.20  362.25   1 0.51632-0.51632-0.38213 0.83658-0.76641 0.18312
   0 -11 -18 1541.67  366.85   1 0.50092-0.50092-0.84468 0.39005 0.18860-0.77261
   0  11  18 1187.49  421.51   1 0.53195-0.53195 0.82835-0.37403-0.17563 0.75968
   0  11 -19  852.50  192.92   1 0.51866-0.51866-0.38793 0.84238-0.76190 0.14621
   0 -11 -19  655.01  196.12   1 0.51498-0.51498-0.84450 0.38986 0.14695-0.76340
   0  11  19   71.40  159.38   1 0.52489-0.52489 0.83911-0.38479-0.14272 0.75922
   0  11 -20  392.02  218.56   1 0.52041-0.52041-0.39230 0.84675-0.75846 0.11037
   0 -11 -20 -403.31  293.02   1 0.52752-0.52752-0.84279 0.38816 0.10677-0.75567
   0  11  20  767.39  364.72   1 0.51741-0.51741 0.84856-0.39424-0.11057 0.75951
   0  11 -21 1518.55  450.87   1 0.52163-0.52163-0.39536 0.84982-0.75603 0.07553
   0 -11 -21  419.57  389.19   1 0.53870-0.53870-0.83974 0.38511 0.06798-0.74932
   0 -11 -22 5504.27  684.01   1 0.54863-0.54863-0.83550 0.38086 0.03048-0.74426
   0  12   051447.50 2243.67   1 0.15902-0.15902 0.24784 0.24784-0.95565 0.95565
   0  12   059047.05 7138.63   1 0.47370-0.47370 0.24782 0.24782-0.84509 0.84509
   0  12   1 2429.65  494.60   1 0.11293-0.11293 0.31065 0.18504-0.94379 0.97621
   0  12  -1 3032.44  524.53   1 0.20237-0.20237 0.18599 0.30969-0.96148 0.92904
   0  12   1 2005.49  414.00   1 0.49258-0.49258 0.30229 0.19336-0.81607 0.84851
   0  12  -1 2735.20  533.75   1 0.45251-0.45251 0.19183 0.30362-0.87087 0.83847
   0  12   2 1593.94  406.79   1 0.06482-0.06482 0.37318 0.12251-0.92548 0.99034
   0  12  -2 1292.22  357.52   1 0.24253-0.24253 0.12621 0.36948-0.96189 0.89702
   0  12   2 2068.62  379.80   1 0.50916-0.50916 0.35471 0.14094-0.78417 0.84904
   0  12  -2 1880.62  449.01   1 0.42968-0.42968 0.13518 0.36027-0.89280 0.82799
   0  12   3 1829.97  372.56   1 0.01549-0.01549 0.43413 0.06165-0.90071 0.99797
   0  12  -3 2108.48  595.02   1 0.27915-0.27915 0.06940 0.42629-0.95773 0.86043
   0  12   3 1495.44  431.04   1 0.52340-0.52340 0.40460 0.09104-0.74989 0.84720
   0  12  -3 2868.13  680.97   1 0.40530-0.40530 0.07855 0.41690-0.91080 0.81358
   0  12   4 1155.69  296.14   1-0.03405 0.03405 0.49235 0.00343-0.86972 0.99941
   0  12  -4  968.11  431.37   1 0.31210-0.31210 0.01621 0.47948-0.94990 0.82017
   0  12   4  983.05  297.19   1 0.53531-0.53531 0.45165 0.04400-0.71375 0.84350
   0  12  -4  688.84  242.68   1 0.37978-0.37978 0.02274 0.47271-0.92479 0.79517
   0  12   510588.40 1374.06   1-0.08300 0.08300 0.54680-0.05101-0.83313 0.99524
   0  12  -511456.49 1499.68   1 0.34146-0.34146-0.03283 0.52855-0.93932 0.77719
   0  12   511424.44 1730.32   1 0.54489-0.54489 0.49570-0.00012-0.67629 0.83850
   0  12  -511138.87  556.40   1 0.35339-0.35339-0.03152 0.52714-0.93494 0.77280
   0  12   6  689.45  288.73   1-0.13060 0.13060 0.59670-0.10059-0.79175 0.98631
   0  12  -6  756.73  287.83   1 0.36727-0.36727-0.07771 0.57344-0.92686 0.73230
   0  12   6 1243.62  344.01   1 0.55244-0.55244 0.53656-0.04099-0.63788 0.83253
   0  12  -6 1718.90  405.62   1 0.32695-0.32695-0.08353 0.57916-0.94134 0.74677
   0  12   7 6119.60  669.78   1-0.17608 0.17608 0.64156-0.14545-0.74658 0.97357
   0  12  -7 5711.99  793.40   1 0.38982-0.38982-0.11832 0.61405-0.91325 0.68627
   0  12   7 5640.61  952.64   1 0.55804-0.55804 0.57429-0.07872-0.59896 0.82606
   0  12  -7 4998.53  773.94   1 0.30075-0.30075-0.13274 0.62836-0.94441 0.71742
   0  12   8  686.90  440.42   1-0.21898 0.21898 0.68117-0.18505-0.69860 0.95801
   0  12  -8  718.50  184.25   1 0.40941-0.40941-0.15476 0.65049-0.89912 0.63972
   0  12   8 1721.53  400.02   1 0.56186-0.56186 0.60896-0.11338-0.55987 0.81941
   0  12  -8 1721.30  489.96   1 0.27522-0.27522-0.17873 0.67435-0.94462 0.68519
   0  12  -9  768.22  389.96   1 0.42632-0.42632-0.18722 0.68294-0.88498 0.59314
   0  12   9  935.57  324.81   1 0.56380-0.56380 0.64075-0.14532-0.52110 0.81301
   0  12  10 1720.24  491.49   1-0.29557 0.29557 0.74495-0.24941-0.59806 0.92218
   0  12 -10 2266.01  391.48   1 0.44086-0.44086-0.21594 0.71167-0.87120 0.54694
   0  12  10 1979.94  688.27   1 0.56459-0.56459 0.66971-0.17427-0.48240 0.80676
   0  12  11 3048.29  630.08   1-0.32946 0.32946 0.76958-0.27404-0.54698 0.90352
   0  12 -11 4267.03  621.64   1 0.45331-0.45331-0.24122 0.73695-0.85808 0.50140
   0  12  11 4231.49  766.79   1 0.56410-0.56410 0.69605-0.20062-0.44417 0.80096
   0  12  12 4169.20  828.63   1-0.36035 0.36035 0.78988-0.29434-0.49620 0.88516
   0  12 -12 4646.38  698.33   1 0.46382-0.46382-0.26313 0.75890-0.84594 0.45708
   0  12  12 5693.84  971.86   1 0.56248-0.56248 0.71997-0.22453-0.40651 0.79573
   0  12 -13  658.58  355.14   1 0.47285-0.47285-0.28237 0.77814-0.83466 0.41340
   0  12  13  787.68  332.03   1 0.55986-0.55986 0.74162-0.24619-0.36950 0.79116
   0  12 -14 1164.39  423.80   1 0.48048-0.48048-0.29899 0.79475-0.82445 0.37079
   0  12  14 1017.03  373.53   1 0.55637-0.55637 0.76120-0.26576-0.33319 0.78728
   0  12 -15 2513.10  692.70   1 0.48691-0.48691-0.31324 0.80900-0.81534 0.32927
   0  12  15 3723.53  787.77   1 0.55248-0.55248 0.77870-0.28308-0.29727 0.78397
   0  12 -16 1413.45  439.45   1 0.49228-0.49228-0.32533 0.82110-0.80735 0.28887
   0  12  16 1588.67  442.92   1 0.54752-0.54752 0.79458-0.29895-0.26241 0.78156
   0  12 -17  354.57  357.29   1 0.49671-0.49671-0.33549 0.83125-0.80044 0.24956
   0  12  17  -17.51  151.08   1 0.54193-0.54193 0.80882-0.31320-0.22828 0.77987
   0  12 -18  607.92  214.26   1 0.50034-0.50034-0.34387 0.83964-0.79461 0.21132
   0 -12 -18  860.18  343.56   1 0.49175-0.49175-0.84398 0.34801 0.21415-0.79815
   0  12  18 1138.31  413.00   1 0.53578-0.53578 0.82156-0.32593-0.19486 0.77890
   0  12 -19 1464.67  394.21   1 0.50323-0.50323-0.35065 0.84642-0.78980 0.17411
   0 -12 -19 1185.46  580.13   1 0.50667-0.50667-0.84481 0.34884 0.17195-0.78840
   0  12  19  582.38  368.14   1 0.52913-0.52913 0.83290-0.33728-0.16213 0.77862
   0  12 -20 1089.31  551.11   1 0.50549-0.50549-0.35597 0.85174-0.78597 0.13788
   0 -12 -20  346.59  254.72   1 0.52005-0.52005-0.84401 0.34804 0.13111-0.78000
   0  12  20  388.73  152.98   1 0.52202-0.52202 0.84295-0.34733-0.13006 0.77900
   0  12 -21  660.96  363.54   1 0.50716-0.50716-0.35995 0.85572-0.78308 0.10257
   0 -12 -21  883.20  453.73   1 0.53202-0.53202-0.84176 0.34579 0.09156-0.77290
   0  12  21 1079.04  296.31   1 0.51448-0.51448 0.85180-0.35618-0.09863 0.78002
   0  13   0  865.03  353.70   1 0.14410-0.14410 0.26850 0.26850-0.95243 0.95243
   0  13   0  229.40  358.96   1 0.48105-0.48105 0.26848 0.26848-0.83456 0.83456
   0  13   1  870.66  242.22   1 0.10115-0.10115 0.32624 0.21076-0.93985 0.97228
   0  13  -1  636.71  233.16   1 0.18474-0.18474 0.21152 0.32548-0.95975 0.92732
   0  13   1 1170.86  265.36   1 0.49778-0.49778 0.31820 0.21876-0.80682 0.83925
   0  13  -1  393.25  293.03   1 0.46232-0.46232 0.21745 0.31929-0.85963 0.82722
   0  13   212588.49 1519.65   1 0.05647-0.05647 0.38374 0.15326-0.92171 0.98657
   0  13  -214876.44 1769.81   1 0.22262-0.22262 0.15617 0.38082-0.96231 0.89744
   0  13   215805.74 1797.85   1 0.51259-0.51259 0.36622 0.17073-0.77660 0.84148
   0  13  -215345.24 1959.77   1 0.44224-0.44224 0.16585 0.37088-0.88142 0.81661
   0  13   310652.62 1421.13   1 0.01064-0.01064 0.43996 0.09713-0.89794 0.99521
   0  13  -310783.95 1140.27   1 0.25752-0.25753 0.10323 0.43376-0.96073 0.86343
   0  13   312768.57 1690.10   1 0.52543-0.52543 0.41219 0.12476-0.74432 0.84163
   0  13  -3 9092.50 1264.82   1 0.42081-0.42081 0.11418 0.42256-0.89992 0.80271
   0  13   4  671.29  310.36   1-0.03547 0.03547 0.49397 0.04313-0.86875 0.99843
   0  13  -4   75.79  284.06   1 0.28928-0.28928 0.05327 0.48373-0.95575 0.82602
   0  13   4  548.80  291.66   1 0.53619-0.53619 0.45584 0.08103-0.71042 0.84019
   0  13  -4  436.10  303.69   1 0.39835-0.39835 0.06304 0.47370-0.91506 0.78544
   0  13   5 3052.60  506.82   1-0.08124 0.08124 0.54489-0.00778-0.83455 0.99666
   0  13  -5 2748.05  444.41   1 0.31787-0.31787 0.00667 0.53033-0.94810 0.78593
   0  13   5 2784.42  420.68   1 0.54514-0.54514 0.49694 0.03993-0.67518 0.83739
   0  13  -5 3916.42  712.05   1 0.37520-0.37520 0.01304 0.52370-0.92685 0.76482
   0  13   614312.42 1660.53   1-0.12607 0.12607 0.59207-0.05462-0.79595 0.99051
   0  13  -614270.95 1342.57   1 0.34344-0.34344-0.03622 0.57326-0.93847 0.74391
   0  13   614158.86 1611.75   1 0.55225-0.55225 0.53541 0.00145-0.63901 0.83367
   0  13  -614769.69  655.93   1 0.35152-0.35152-0.03528 0.57221-0.93551 0.74094
   0  13   7 1958.57  490.34   1-0.16923 0.16923 0.63499-0.09753-0.75375 0.98073
   0  13  -7 1746.36  478.28   1 0.36603-0.36603-0.07553 0.61257-0.92752 0.70054
   0  13   7 2125.75  529.00   1 0.55764-0.55764 0.57122-0.03435-0.60227 0.82936
   0  13  -7 1555.91  451.53   1 0.32804-0.32804-0.08143 0.61836-0.94114 0.71415
   0  13   8  692.94  233.98   1-0.21033 0.21033 0.67340-0.13595-0.70871 0.96813
   0  13  -8  604.15  266.58   1 0.38592-0.38592-0.11119 0.64823-0.91580 0.65639
   0  13   8  667.15  288.49   1 0.56144-0.56144 0.60441-0.06753-0.56521 0.82475
   0  13  -8 1267.10  403.47   1 0.30494-0.30494-0.12503 0.66195-0.94412 0.68470
   0  13   9  530.92  195.29   1-0.24905 0.24905 0.70723-0.16978-0.66165 0.95349
   0  13  -9  834.18  439.97   1 0.40332-0.40332-0.14330 0.68034-0.90376 0.61193
   0  13   9  833.26  451.48   1 0.56378-0.56378 0.63503-0.09816-0.52808 0.82006
   0  13  -9  557.62  283.18   1 0.28251-0.28251-0.16578 0.70271-0.94482 0.65297
   0  13  10 9298.66 1863.11   1-0.28476 0.28476 0.73663-0.19979-0.61341 0.93754
   0  13 -1012929.74 2105.32   1 0.41847-0.41847-0.17203 0.70907-0.89178 0.56752
   0  13  1012546.01 1965.91   1 0.56453-0.56453 0.66327-0.12654-0.49130 0.81565
   0  13 -1012606.27 2053.78   1 0.26102-0.26102-0.20352 0.74044-0.94363 0.61935
   0  13  11  673.84  237.05   1-0.31822 0.31822 0.76167-0.22483-0.56442 0.92096
   0  13 -11 1265.12  462.78   1 0.43162-0.43162-0.19759 0.73463-0.88014 0.52346
   0  13  11 1056.50  375.46   1 0.56435-0.56435 0.68911-0.15239-0.45455 0.81134
   0  13  12 2807.53  697.07   1-0.34901 0.34901 0.78269-0.24585-0.51533 0.90429
   0  13 -12 4342.72  987.02   1 0.44298-0.44298-0.22019 0.75723-0.86906 0.47995
   0  13  12 4768.65  944.90   1 0.56310-0.56310 0.71275-0.17603-0.41819 0.80741
   0  13  13  237.30  396.29   1-0.37721 0.37721 0.80000-0.26316-0.46658 0.88794
   0  13 -13  846.05  393.86   1 0.45275-0.45275-0.24006 0.77710-0.85870 0.43717
   0  13  13  556.96  309.47   1 0.56088-0.56088 0.73433-0.19761-0.38230 0.80396
   0  13 -14 1116.36  384.80   1 0.46102-0.46102-0.25724 0.79432-0.84928 0.39561
   0  13  14 2897.94  838.12   1 0.55780-0.55780 0.75398-0.21725-0.34694 0.80103
   0  13 -15  213.35  344.53   1 0.46815-0.46815-0.27230 0.80938-0.84064 0.35456
   0  13  15  620.59  315.31   1 0.55393-0.55393 0.77182-0.23510-0.31214 0.79867
   0  13 -16  702.65  417.73   1 0.47419-0.47419-0.28527 0.82235-0.83292 0.31444
   0  13  16 1122.60  366.31   1 0.54977-0.54977 0.78784-0.25091-0.27758 0.79673
   0  13 -17 1195.08  354.61   1 0.47926-0.47926-0.29630 0.83338-0.82613 0.27525
   0  13  17 1988.23  573.33   1 0.54459-0.54459 0.80243-0.26551-0.24396 0.79556
   0  13 -18  829.35  503.71   1 0.48347-0.48347-0.30558 0.84266-0.82028 0.23700
   0  13  18  530.65  340.55   1 0.53882-0.53882 0.81557-0.27865-0.21094 0.79499
   0  13 -19  171.72  250.76   1 0.48691-0.48691-0.31324 0.85032-0.81534 0.19965
   0 -13 -19 1169.72  419.31   1 0.49910-0.49910-0.84459 0.30729 0.19377-0.81022
   0  13  19  693.76  288.42   1 0.53254-0.53254 0.82736-0.29043-0.17851 0.79501
   0  13 -20  587.25  381.50   1 0.48966-0.48966-0.31942 0.85650-0.81129 0.16319
   0 -13 -20 1148.75  405.73   1 0.51318-0.51318-0.84462 0.30732 0.15247-0.80136
   0  13  20  659.53  344.33   1 0.52577-0.52577 0.83788-0.30096-0.14666 0.79560
   0  14   011518.76 1453.79   1 0.12895-0.12895 0.28915 0.28915-0.94855 0.94855
   0  14   014936.53 1975.21   1 0.48817-0.48817 0.28913 0.28913-0.82346 0.82346
   0  14   1  714.03  382.40   1 0.08871-0.08871 0.34251 0.23580-0.93531 0.96774
   0  14  -1 1346.34  439.75   1 0.16721-0.16721 0.23639 0.34192-0.95716 0.92473
   0  14   1 1708.79  515.92   1 0.50303-0.50303 0.33473 0.24352-0.79680 0.82924
   0  14  -1 1366.73  533.73   1 0.47177-0.47177 0.24249 0.33577-0.84771 0.81528
   0  14   2  342.15  345.59   1 0.04688-0.04688 0.39566 0.18275-0.91719 0.98203
   0  14  -2  404.85  253.66   1 0.20309-0.20309 0.18494 0.39337-0.96153 0.89666
   0  14   2 1470.23  416.52   1 0.51627-0.51627 0.37893 0.19933-0.76802 0.83290
   0  14  -2  430.17  297.46   1 0.45381-0.45381 0.19516 0.38286-0.86946 0.80465
   0  14   3  649.24  200.19   1 0.00414-0.00414 0.44774 0.13067-0.89415 0.99141
   0  14  -3  357.90  380.99   1 0.23644-0.23644 0.13545 0.44285-0.96215 0.86485
   0  14   3  211.47  277.04   1 0.52784-0.52784 0.42141 0.15684-0.73742 0.83473
   0  14  -3  362.86  294.07   1 0.43490-0.43490 0.14780 0.43023-0.88826 0.79104
   0  14   4 2164.61  495.10   1-0.03899 0.03899 0.49798 0.08044-0.86631 0.99599
   0  14  -4 1150.47  466.42   1 0.26705-0.26705 0.08843 0.48988-0.95961 0.82987
   0  14   4 2216.00  646.75   1 0.53761-0.53761 0.46197 0.11620-0.70537 0.83514
   0  14  -4  697.97  340.86   1 0.41505-0.41505 0.10079 0.47724-0.90419 0.77457
   0  14   5 2254.60  422.55   1-0.08194 0.08194 0.54565 0.03276-0.83399 0.99609
   0  14  -5  971.55  385.05   1 0.29490-0.29490 0.04423 0.53408-0.95450 0.79233
   0  14   5 1076.00  410.82   1 0.54583-0.54583 0.50039 0.07777-0.67206 0.83427
   0  14  -5 1571.75  386.07   1 0.39453-0.39453 0.05461 0.52341-0.91725 0.75523
   0  14   613883.18  841.52   1-0.12425 0.12425 0.59021-0.01141-0.79762 0.99218
   0  14  -614323.45 2468.77   1 0.32003-0.32003 0.00309 0.57521-0.94740 0.75279
   0  14   614855.26 1790.82   1 0.55245-0.55245 0.53660 0.04157-0.63785 0.83250
   0  14  -614241.14 1821.61   1 0.37345-0.37345 0.00972 0.56850-0.92759 0.73303
   0  14   7 4244.09  715.05   1-0.16522 0.16522 0.63112-0.05232-0.75788 0.98486
   0  14  -7 3117.17  664.23   1 0.34258-0.34258-0.03474 0.61309-0.93884 0.71186
   0  14   7 3541.53  712.85   1 0.55755-0.55755 0.57053 0.00763-0.60300 0.83010
   0  14  -7 3673.94 1093.55   1 0.35242-0.35242-0.03347 0.61170-0.93524 0.70824
   0  14   8 5972.74 1210.49   1-0.20454 0.20454 0.66814-0.08934-0.71535 0.97477
   0  14  -8 6217.83  685.83   1 0.36260-0.36260-0.06948 0.64783-0.92934 0.66993
   0  14   8 6653.16 1136.74   1 0.56123-0.56123 0.60220-0.02403-0.56776 0.82730
   0  14  -8 5911.08 1119.42   1 0.33156-0.33156-0.07463 0.65286-0.94047 0.68105
   0  14   9 3197.50  518.15   1-0.24189 0.24189 0.70115-0.12235-0.67071 0.96255
   0  14  -9 4439.77  606.36   1 0.38033-0.38033-0.10107 0.67942-0.91930 0.62747
   0  14   9 5064.71  829.02   1 0.56358-0.56359 0.63164-0.05347-0.53233 0.82432
   0  14  -9 3159.66  876.81   1 0.31115-0.31115-0.11347 0.69170-0.94356 0.65171
   0  14  10 4852.87  832.18   1-0.27659 0.27659 0.73019-0.15205-0.62475 0.94888
   0  14 -10 6565.08  687.88   1 0.39595-0.39595-0.12961 0.70795-0.90907 0.58481
   0  14  10 5581.45  895.52   1 0.56445-0.56445 0.65897-0.08096-0.49713 0.82148
   0  14 -10 4369.08  783.81   1 0.29140-0.29140-0.14980 0.72803-0.94479 0.62052
   0  14  11  677.05  570.43   1-0.30942 0.30942 0.75530-0.17716-0.57773 0.93427
   0  14 -11  -46.42  372.55   1 0.40966-0.40966-0.15523 0.73358-0.89893 0.54224
   0  14  11 1356.66  472.29   1 0.56447-0.56447 0.68417-0.10616-0.46180 0.81859
   0  14 -11  771.17  254.73   1 0.27251-0.27251-0.18350 0.76173-0.94449 0.58778
   0  14  12  901.01  276.62   1-0.33989 0.33989 0.77668-0.19854-0.53031 0.91926
   0  14 -12 1523.79  427.38   1 0.42163-0.42163-0.17811 0.75646-0.88910 0.49999
   0  14  12 2124.81  582.14   1 0.56348-0.56348 0.70739-0.12938-0.42670 0.81592
   0  14 -12  987.43  399.45   1 0.25462-0.25462-0.21452 0.79275-0.94294 0.55381
   0  14  13 2130.76  817.80   1-0.36802 0.36802 0.79458-0.21644-0.48290 0.90427
   0  14 -13 1615.25  512.01   1 0.43204-0.43204-0.19842 0.77677-0.87975 0.45821
   0  14  13 4517.52 1368.73   1 0.56157-0.56157 0.72871-0.15070-0.39192 0.81358
   0  14 -14  803.25  304.08   1 0.44106-0.44106-0.21634 0.79469-0.87101 0.41704
   0  14  14 1064.99  468.83   1 0.55881-0.55881 0.74826-0.17025-0.35753 0.81162
   0  14 -15  404.07  258.81   1 0.44883-0.44883-0.23204 0.81039-0.86296 0.37657
   0  14  15  589.83  329.89   1 0.55529-0.55529 0.76612-0.18811-0.32357 0.81009
   0  14 -16 2627.48  910.88   1 0.45549-0.45549-0.24570 0.82405-0.85566 0.33684
   0  14  16 2185.79  503.81   1 0.55147-0.55147 0.78227-0.20404-0.28969 0.80885
   0  14 -17  499.82  305.88   1 0.46105-0.46105-0.25731 0.83570-0.84924 0.29836
   0  14  17  283.09  335.07   1 0.54663-0.54663 0.79706-0.21883-0.25667 0.80827
   0  14 -18  501.90  334.26   1 0.46582-0.46582-0.26735 0.84574-0.84352 0.26023
   0  14  18  562.10  245.22   1 0.54120-0.54120 0.81046-0.23224-0.22413 0.80818
   0  14 -19 1175.60  494.34   1 0.46978-0.46978-0.27578 0.85417-0.83859 0.22290
   0 -14 -19 1930.99  487.71   1 0.49237-0.49237-0.84405 0.26542 0.21247-0.82892
   0  14  19  899.15  325.38   1 0.53524-0.53524 0.82256-0.24433-0.19209 0.80858
   0  15   0  106.83  199.80   1 0.11356-0.11356 0.30981 0.30981-0.94399 0.94399
   0  15   0  -14.60  327.53   1 0.49505-0.49505 0.30978 0.30978-0.81176 0.81176
   0  15   1 4893.74  938.03   1 0.07568-0.07568 0.35934 0.26028-0.93013 0.96256
   0  15  -1 4364.17  835.60   1 0.14973-0.14973 0.26074 0.35887-0.95372 0.92129
   0  15   1 4248.56  789.95   1 0.50828-0.50828 0.35178 0.26778-0.78605 0.81849
   0  15  -1 5725.20  968.44   1 0.48049-0.48049 0.26689 0.35267-0.83539 0.80295
   0  15   2 1120.75  356.09   1 0.03638-0.03638 0.40867 0.21106-0.91195 0.97679
   0  15  -2 1035.64  382.78   1 0.18388-0.18388 0.21275 0.40686-0.95964 0.89478
   0  15   2  880.46  382.83   1 0.52012-0.52012 0.39260 0.22696-0.75850 0.82337
   0  15  -2 1571.59  567.82   1 0.46454-0.46454 0.22338 0.39594-0.85691 0.79210
   0  15   315054.14 1857.61   1-0.00372 0.00372 0.45709 0.16265-0.88941 0.98667
   0  15  -314181.57 1035.79   1 0.21575-0.21575 0.16635 0.45326-0.96217 0.86486
   0  15   313083.61 1727.96   1 0.53052-0.53052 0.43198 0.18759-0.72933 0.82665
   0  15  -313903.45 1821.17   1 0.44780-0.44780 0.17980 0.43951-0.87586 0.77865
   0  15   4 1078.42  354.69   1-0.04425 0.04425 0.50394 0.11579-0.86260 0.99228
   0  15  -4  143.63  340.60   1 0.24529-0.24529 0.12202 0.49759-0.96173 0.83200
   0  15   4  836.15  582.03   1 0.53936-0.53936 0.46973 0.14973-0.69888 0.82865
   0  15  -4  532.23  254.07   1 0.43021-0.43021 0.13646 0.48285-0.89235 0.76273
   0  15   5  918.85  303.77   1-0.08470 0.08470 0.54863 0.07110-0.83175 0.99386
   0  15  -5   61.72  310.17   1 0.27239-0.27239 0.08007 0.53954-0.95884 0.79667
   0  15   5  496.04  271.74   1 0.54687-0.54687 0.50569 0.11377-0.66723 0.82944
   0  15  -5  257.12  176.76   1 0.41198-0.41198 0.09373 0.52558-0.90635 0.74433
   0  15   6  608.68  284.53   1-0.12472 0.12472 0.59069 0.02944-0.79719 0.99175
   0  15  -6  424.07  209.20   1 0.29706-0.29706 0.04075 0.57887-0.95398 0.75938
   0  15   6  446.30  308.61   1 0.55297-0.55297 0.53976 0.07970-0.63472 0.82937
   0  15  -6  438.71  234.46   1 0.39334-0.39334 0.05201 0.56731-0.91791 0.72348
   0  15   7  512.53  182.13   1-0.16366 0.16366 0.62960-0.00945-0.75948 0.98647
   0  15  -7  293.08  301.00   1 0.31937-0.31937 0.00418 0.61543-0.94761 0.72057
   0  15   7  579.24  162.88   1 0.55773-0.55773 0.57189 0.04757-0.60155 0.82865
   0  15  -7  333.27  218.81   1 0.37452-0.37452 0.01162 0.60769-0.92714 0.70031
   0  15   8 3585.68  884.25   1-0.20125 0.20125 0.66513-0.04499-0.71909 0.97850
   0  15  -8 4765.99  910.17   1 0.33943-0.33943-0.02956 0.64918-0.94016 0.68069
   0  15   8 4629.60 1011.08   1 0.56121-0.56121 0.60205 0.01741-0.56794 0.82748
   0  15  -8 6494.96  837.33   1 0.35556-0.35556-0.02712 0.64665-0.93425 0.67483
   0  15   9  201.67  191.33   1-0.23720 0.23720 0.69713-0.07699-0.67656 0.96840
   0  15  -9  931.08  408.41   1 0.35741-0.35741-0.06037 0.68003-0.93199 0.64016
   0  15   9  699.37  227.37   1 0.56350-0.56350 0.63027-0.01080-0.53406 0.82604
   0  15  -9  937.44  479.54   1 0.33703-0.33703-0.06398 0.68351-0.93931 0.64746
   0  15  10 6490.80 1540.65   1-0.27080 0.27080 0.72555-0.10612-0.63264 0.95676
   0  15 -10 7048.02 1207.35   1 0.37336-0.37336-0.08855 0.70821-0.92344 0.59918
   0  15  10 6480.06  950.97   1 0.56439-0.56439 0.65661-0.03732-0.50030 0.82465
   0  15 -10 7527.43 1295.64   1 0.31897-0.31897-0.09874 0.71827-0.94260 0.61832
   0  15  11 2300.04  631.54   1-0.30287 0.30287 0.75045-0.13102-0.58744 0.94398
   0  15 -11 3033.36  708.29   1 0.38750-0.38750-0.11407 0.73373-0.91478 0.55809
   0  15  11 2798.91  767.58   1 0.56453-0.56453 0.68107-0.06177-0.46630 0.82309
   0  15 -11 3489.21  932.80   1 0.30155-0.30155-0.13127 0.75080-0.94436 0.58766
   0  15  12 1826.69  668.35   1-0.33285 0.33285 0.77192-0.15249-0.54161 0.93056
   0  15 -12 2312.45  779.53   1 0.39997-0.39997-0.13705 0.75671-0.90622 0.51711
   0  15  12 3185.55  758.48   1 0.56371-0.56371 0.70373-0.08443-0.43241 0.82164
   0  15 -12 3372.26  687.51   1 0.28491-0.28491-0.16149 0.78102-0.94485 0.55571
   0  15  13  241.88  243.99   1-0.36073 0.36073 0.79012-0.17069-0.49555 0.91691
   0  15 -13  986.60  466.13   1 0.41092-0.41092-0.15763 0.77729-0.89793 0.47640
   0  15  13  611.60  348.67   1 0.56201-0.56201 0.72467-0.10537-0.39872 0.82038
   0  15 -13  724.72  383.14   1 0.26917-0.26917-0.18935 0.80888-0.94429 0.52273
   0  15 -14 1841.70  543.22   1 0.42050-0.42050-0.17594 0.79560-0.89006 0.43610
   0  15  14 2114.44  771.67   1 0.55951-0.55951 0.74397-0.12468-0.36529 0.81939
   0  15 -14 1531.02  534.11   1 0.25442-0.25442-0.21486 0.83439-0.94292 0.48893
   0  15 -15  448.64  354.00   1 0.42884-0.42884-0.19214 0.81180-0.88270 0.39631
   0  15  15  847.19  271.66   1 0.55626-0.55626 0.76172-0.14243-0.33218 0.81871
   0  15 -16  411.45  222.90   1 0.43606-0.43606-0.20636 0.82602-0.87593 0.35712
   0  15  16 -127.48  343.22   1 0.55272-0.55272 0.77786-0.15834-0.29903 0.81818
   0  15 -17  436.71  391.92   1 0.44226-0.44226-0.21874 0.83840-0.86980 0.31856
   0  15  17  476.00  201.29   1 0.54816-0.54816 0.79272-0.17320-0.26664 0.81823
   0  15 -18  775.76  432.40   1 0.44754-0.44754-0.22941 0.84907-0.86433 0.28066
   0  15  18  988.70  424.16   1 0.54302-0.54302 0.80626-0.18673-0.23464 0.81868
   0  16   0 8380.55  586.22   1 0.09794-0.09794 0.33046 0.33046-0.93872 0.93872
   0  16   0 7941.90  561.47   1 0.50168-0.50168 0.33043 0.33043-0.79944 0.79944
   0  16   1  747.49  313.41   1 0.06212-0.06212 0.37661 0.28431-0.92428 0.95671
   0  16  -1  197.04  271.98   1 0.13225-0.13225 0.28467 0.37625-0.94945 0.91702
   0  16   1  808.24  371.23   1 0.51348-0.51348 0.36925 0.29162-0.77458 0.80702
   0  16  -1  559.64  260.88   1 0.48875-0.48875 0.29086 0.37001-0.82250 0.79006
   0  16   2  438.21  237.39   1 0.02503-0.02503 0.42257 0.23848-0.90598 0.97082
   0  16  -2  413.19  202.28   1 0.16481-0.16481 0.23976 0.42117-0.95673 0.89188
   0  16   2 1411.69  309.98   1 0.52406-0.52406 0.40706 0.25381-0.74810 0.81297
   0  16  -2  532.64  370.96   1 0.47478-0.47478 0.25080 0.41006-0.84360 0.77873
   0  16   3 2037.40  461.13   1-0.01276 0.01276 0.46771 0.19333-0.88378 0.98104
   0  16  -3  993.42  291.81   1 0.19540-0.19540 0.19618 0.46474-0.96089 0.86361
   0  16   3 1924.53  441.64   1 0.53340-0.53340 0.44364 0.21722-0.72017 0.81749
   0  16  -3 1422.17  342.84   1 0.45969-0.45969 0.21049 0.45011-0.86277 0.76555
   0  16   4 3449.84  552.79   1-0.05097 0.05097 0.51152 0.14953-0.85775 0.98744
   0  16  -4 2443.12  482.02   1 0.22388-0.22388 0.15430 0.50663-0.96232 0.83258
   0  16   4 2929.15  506.63   1 0.54136-0.54136 0.47885 0.18191-0.69110 0.82087
   0  16  -4 3714.19  699.56   1 0.44407-0.44407 0.17042 0.49018-0.87963 0.75001
   0  16   5  709.56  333.61   1-0.08919 0.08919 0.55346 0.10758-0.82807 0.99018
   0  16  -5  693.11  182.05   1 0.25023-0.25023 0.11446 0.54646-0.96139 0.79922
   0  16   5 1071.73  301.19   1 0.54818-0.54818 0.51254 0.14822-0.66090 0.82312
   0  16  -5  797.70  414.03   1 0.42786-0.42786 0.13082 0.52978-0.89432 0.73230
   0  16   6 2064.11  386.02   1-0.12714 0.12714 0.59317 0.06830-0.79497 0.98952
   0  16  -6 1128.04  304.56   1 0.27442-0.27442 0.07688 0.58404-0.95853 0.76392
   0  16   6 1715.67  578.89   1 0.55375-0.55375 0.54461 0.11615-0.62988 0.82453
   0  16  -6 1808.63  534.06   1 0.41123-0.41123 0.09200 0.56860-0.90687 0.71244
   0  16   7 4514.67  955.38   1-0.16419 0.16419 0.63011 0.03137-0.75894 0.98592
   0  16  -7 4911.96  477.79   1 0.29647-0.29647 0.04170 0.61922-0.95412 0.72709
   0  16   7 4213.08 1477.89   1 0.55813-0.55813 0.57500 0.08576-0.59820 0.82530
   0  16  -7 3850.45 1031.35   1 0.39437-0.39437 0.05426 0.60635-0.91734 0.69051
   0  16   8 2047.04  349.07   1-0.20013 0.20013 0.66410-0.00262-0.72035 0.97976
   0  16  -8 2304.43  586.34   1 0.31646-0.31646 0.00900 0.65192-0.94855 0.68908
   0  16   8 1736.28  401.30   1 0.56137-0.56137 0.60369 0.05707-0.56604 0.82558
   0  16  -8 2560.27  670.95   1 0.37747-0.37747 0.01784 0.64276-0.92584 0.66660
   0  16   9 3396.31 1014.65   1-0.23470 0.23470 0.69497-0.03348-0.67965 0.97149
   0  16  -9 3838.07  942.95   1 0.33450-0.33450-0.02118 0.68211-0.94215 0.65024
   0  16   9 2202.79  470.12   1 0.56352-0.56352 0.63066 0.03009-0.53356 0.82554
   0  16  -9 3734.02  874.86   1 0.36054-0.36054-0.01700 0.67783-0.93258 0.64073
   0  16  10  697.31  224.67   1-0.26716 0.26716 0.72261-0.06188-0.63753 0.96166
   0  16 -10 1511.06  588.34   1 0.35073-0.35073-0.04877 0.70974-0.93520 0.61094
   0  16  10 1359.02  423.90   1 0.56438-0.56438 0.65599 0.00459-0.50114 0.82550
   0  16 -10 1169.27  277.42   1 0.34408-0.34408-0.05010 0.71094-0.93759 0.61332
   0  16  1111305.13 3660.10   1-0.29838 0.29838 0.74708-0.08636-0.59399 0.95052
   0  16 -11 9610.78 2929.72   1 0.36519-0.36519-0.07404 0.73501-0.92798 0.57129
   0  16  1110852.07 3071.06   1 0.56455-0.56455 0.67962-0.01904-0.46838 0.82517
   0  16 -1112379.63 3882.18   1 0.32810-0.32810-0.08131 0.74215-0.94113 0.58443
   0  16  12  633.14  441.29   1-0.32776 0.32776 0.76841-0.10768-0.54965 0.93860
   0  16 -12 1118.83  542.38   1 0.37806-0.37806-0.09698 0.75795-0.92068 0.53157
   0  16  12  789.99  292.72   1 0.56383-0.56383 0.70164-0.04106-0.43564 0.82486
   0  16 -12 1186.91  537.01   1 0.31272-0.31272-0.11052 0.77136-0.94339 0.55425
   0  16  13 2620.87  763.76   1-0.35525 0.35525 0.78669-0.12597-0.50487 0.92624
   0  16 -13 4328.07  918.56   1 0.38947-0.38947-0.11767 0.77864-0.91348 0.49195
   0  16  13 4101.11 1347.72   1 0.56227-0.56227 0.72210-0.06152-0.40299 0.82465
   0  16 -13 3569.17  880.65   1 0.29806-0.29806-0.13768 0.79851-0.94456 0.52300
   0  16 -14  658.87  267.84   1 0.39953-0.39953-0.13624 0.79721-0.90653 0.45257
   0  16  14  651.77  209.02   1 0.55995-0.55995 0.74106-0.08047-0.37051 0.82460
   0  16 -14  547.34  193.35   1 0.28421-0.28421-0.16274 0.82357-0.94484 0.49085
   0  16  15  967.63  498.54   1 0.55691-0.55691 0.75857-0.09799-0.33824 0.82477
   0  16 -15  230.18  167.92   1 0.27125-0.27125-0.18572 0.84655-0.94442 0.45800
   0  16 -16  -91.05  340.79   1 0.41608-0.41608-0.16744 0.82841-0.89377 0.37496
   0  16  16  180.42  170.08   1 0.55359-0.55359 0.77460-0.11377-0.30582 0.82498
   0  16 -16  415.29  265.70   1 0.25921-0.25921-0.20664 0.86747-0.94345 0.42461
   0  17   0  -56.66  275.19   1 0.08206-0.08206 0.35112 0.35112-0.93272 0.93272
   0  17   0   76.57  147.50   1 0.50807-0.50807 0.35109 0.35109-0.78650 0.78650
   0  17   1 1499.55  457.74   1 0.04808-0.04808 0.39425 0.30798-0.91774 0.95017
   0  17  -1 1435.09  356.82   1 0.11473-0.11473 0.30825 0.39398-0.94435 0.91192
   0  17   1  709.52  316.96   1 0.51858-0.51858 0.38705 0.31512-0.76240 0.79484
   0  17  -1  513.75  271.10   1 0.49657-0.49657 0.31446 0.38771-0.80902 0.77658
   0  17   211527.69 1695.10   1 0.01295-0.01295 0.43719 0.26517-0.89927 0.96411
   0  17  -2 7683.68  520.36   1 0.14584-0.14584 0.26611 0.43612-0.95284 0.88798
   0  17   2 8703.46  920.89   1 0.52803-0.52803 0.42216 0.28001-0.73685 0.80173
   0  17  -2 7489.69  839.86   1 0.48416-0.48416 0.27741 0.42476-0.82983 0.76495
   0  17   3   20.15  185.62   1-0.02280 0.02280 0.47940 0.22296-0.87729 0.97455
   0  17  -3 -118.35  255.96   1 0.17523-0.17523 0.22507 0.47716-0.95845 0.86116
   0  17   3  540.93  339.92   1 0.53628-0.53628 0.45622 0.24584-0.71011 0.80744
   0  17  -3  510.78  290.89   1 0.47093-0.47093 0.24019 0.46198-0.84883 0.75152
   0  17   4 1909.61  466.10   1-0.05896 0.05896 0.52044 0.18192-0.85185 0.98154
   0  17  -4 1719.08  547.06   1 0.20273-0.20273 0.18546 0.51677-0.96150 0.83177
   0  17   4 2527.12  516.84   1 0.54354-0.54354 0.48911 0.21295-0.68215 0.81192
   0  17  -4 1587.15  433.98   1 0.45682-0.45682 0.20297 0.49892-0.86608 0.73646
   0  17   5  813.74  314.99   1-0.09517 0.09517 0.55986 0.14250-0.82310 0.98520
   0  17  -5  803.51  326.20   1 0.22836-0.22836 0.14761 0.55462-0.96232 0.80015
   0  17   5  551.03  231.51   1 0.54968-0.54968 0.52070 0.18136-0.65323 0.81544
   0  17  -5 1186.49  424.77   1 0.44238-0.44238 0.16621 0.53568-0.88128 0.71926
   0  17   6  613.33  215.88   1-0.13124 0.13124 0.59735 0.10547-0.79116 0.98572
   0  17  -6 1002.17  386.07   1 0.25203-0.25203 0.11170 0.59053-0.96124 0.76664
   0  17   6  910.22  349.83   1 0.55473-0.55473 0.55089 0.15117-0.62352 0.81817
   0  17  -6  688.85  253.66   1 0.42754-0.42754 0.13007 0.57182-0.89458 0.70015
   0  17   7  684.24  204.24   1-0.16654 0.16654 0.63239 0.07043-0.75653 0.98351
   0  17  -7  776.11  306.28   1 0.27378-0.27378 0.07788 0.62435-0.95863 0.73159
   0  17   7  336.14  241.38   1 0.55872-0.55872 0.57963 0.12243-0.59317 0.82026
   0  17  -7  761.54  336.00   1 0.41245-0.41245 0.09479 0.60710-0.90603 0.67920
   0  17   8 9470.52 1738.97   1-0.20093 0.20093 0.66483 0.03799-0.71945 0.97886
   0  17  -812618.72 2397.10   1 0.29364-0.29364 0.04626 0.65597-0.95479 0.69532
   0  17   8 8704.35 1744.97   1 0.56167-0.56167 0.60688 0.09518-0.56232 0.82186
   0  17  -8 9384.29 2173.55   1 0.39725-0.39725 0.06061 0.64128-0.91570 0.65646
   0  17   9  856.22  515.41   1-0.23415 0.23415 0.69449 0.00832-0.68032 0.97216
   0  17  -9 1876.87  623.90   1 0.31169-0.31169 0.01688 0.68535-0.95003 0.65812
   0  17   9  628.72  353.98   1 0.56364-0.56364 0.63263 0.06943-0.53110 0.82309
   0  17  -9  837.63  487.30   1 0.38212-0.38212 0.02773 0.67416-0.92369 0.63205
   0  17  10  847.44  322.82   1-0.26547 0.26547 0.72123-0.01921-0.63980 0.96392
   0  17 -10  472.30  377.26   1 0.32802-0.32802-0.01026 0.71250-0.94461 0.62027
   0  17  10  757.54  333.99   1 0.56440-0.56440 0.65690 0.04496-0.49992 0.82427
   0  17 -10 1837.58  389.61   1 0.36703-0.36703-0.00365 0.70579-0.93020 0.60592
   0  17  11 -154.42  238.66   1-0.29579 0.29579 0.74512-0.04310-0.59773 0.95427
   0  17 -11 1855.71  569.56   1 0.34277-0.34277-0.03507 0.73735-0.93876 0.58207
   0  17  11  575.23  289.83   1 0.56455-0.56455 0.67967 0.02218-0.46831 0.82509
   0  17 -11 -153.65  310.07   1 0.35243-0.35243-0.03345 0.73558-0.93523 0.57853
   0  17  12  127.83  248.08   1-0.32449 0.32449 0.76612-0.06410-0.55476 0.94371
   0  17 -12  998.11  491.70   1 0.35595-0.35595-0.05784 0.76012-0.93270 0.54359
   0  17  12  812.17  389.75   1 0.56386-0.56386 0.70099 0.00087-0.43664 0.82586
   0  17 -12  189.28  310.88   1 0.33829-0.33829-0.06152 0.76365-0.93902 0.54989
   0  17  13  362.22  155.13   1-0.35149 0.35149 0.78429-0.08227-0.51120 0.93256
   0  17 -13  590.18  224.70   1 0.36773-0.36773-0.07853 0.78081-0.92660 0.50507
   0  17  13  399.29  254.26   1 0.56239-0.56239 0.72089-0.01902-0.40498 0.82664
   0  17 -13  544.75  315.98   1 0.32473-0.32473-0.08778 0.78992-0.94172 0.52016
   0  17  14 2097.20  884.14   1-0.37678 0.37678 0.79975-0.09773-0.46735 0.92112
   0  17 -14 3667.90  835.19   1 0.37820-0.37820-0.09722 0.79950-0.92060 0.46664
   0  17  14 3447.52  996.02   1 0.56019-0.56019 0.73942-0.03755-0.37341 0.82751
   0  17 -14 2651.70  871.34   1 0.31183-0.31183-0.11220 0.81433-0.94348 0.48950
   0  17 -15  829.05  352.14   1 0.38746-0.38746-0.11400 0.81628-0.91480 0.42841
   0  17  15 1594.88  512.95   1 0.55729-0.55729 0.75661-0.05474-0.34197 0.82850
   0  17 -15  284.85  252.99   1 0.29966-0.29966-0.13475 0.83688-0.94447 0.45806
   0  18   0 8441.52 2229.14   1 0.06594-0.06594 0.37177 0.37177-0.92597 0.92597
   0  18   010120.93 2912.75   1 0.51420-0.51420 0.37174 0.37174-0.77291 0.77291
   0  18   1  727.70  213.04   1 0.03348-0.03348 0.41224 0.33144-0.91045 0.94287
   0  18  -1  537.62  284.67   1 0.09711-0.09711 0.33155 0.41199-0.93842 0.90599
   0  18   1  987.88  470.95   1 0.52355-0.52355 0.40515 0.33833-0.74949 0.78193
   0  18  -1  934.26  298.51   1 0.50398-0.50398 0.33776 0.40571-0.79492 0.76249
   0  18   2  636.04  263.11   1 0.00020-0.00020 0.45242 0.29126-0.89180 0.95664
   0  18  -2   18.98  222.76   1 0.12691-0.12691 0.29191 0.45163-0.94798 0.88312
   0  18   2  465.41  221.19   1 0.53197-0.53197 0.43781 0.30566-0.72478 0.78966
   0  18  -2  369.19  288.54   1 0.49295-0.49295 0.30342 0.44006-0.81543 0.75055
   0  18   3  472.39  231.43   1-0.03373 0.03373 0.49198 0.25170-0.86995 0.96721
   0  18  -3  158.21  280.29   1 0.15518-0.15518 0.25319 0.49035-0.95488 0.85759
   0  18   3  281.82  179.00   1 0.53933-0.53933 0.46957 0.27378-0.69901 0.79634
   0  18  -3  630.02  276.61   1 0.48120-0.48120 0.26890 0.47457-0.83434 0.73703
   0  18   4  495.25  278.27   1-0.06805 0.06805 0.53049 0.21319-0.84495 0.97463
   0  18  -4  562.51  227.27   1 0.18181-0.18181 0.21571 0.52783-0.95938 0.82966
   0  18   4  956.85  288.43   1 0.54582-0.54582 0.50034 0.24302-0.67211 0.80188
   0  18  -4  960.75  415.91   1 0.46860-0.46860 0.23434 0.50884-0.85176 0.72214
   0  18   5  479.54  309.44   1-0.10244 0.10244 0.56758 0.17610-0.81691 0.97902
   0  18  -5  656.54  251.16   1 0.20669-0.20669 0.17969 0.56385-0.96176 0.79959
   0  18   5  586.57  361.47   1 0.55132-0.55132 0.52998 0.21338-0.64432 0.80653
   0  18  -5 1001.03  380.88   1 0.45574-0.45574 0.20017 0.54301-0.86730 0.70528
   0  18   6  465.47  245.85   1-0.13681 0.13681 0.60299 0.14117-0.78592 0.98048
   0  18  -6  383.10  196.16   1 0.22984-0.22984 0.14538 0.59816-0.96230 0.76770
   0  18   6  412.79  224.43   1 0.55586-0.55586 0.55841 0.18494-0.61578 0.81043
   0  18  -6  422.97  221.36   1 0.44250-0.44250 0.16649 0.57668-0.88117 0.68674
   0  18   7  302.65  181.99   1-0.17049 0.17049 0.63621 0.10795-0.75244 0.97942
   0  18  -7  168.43  326.65   1 0.25125-0.25125 0.11290 0.63064-0.96131 0.73427
   0  18   7  609.20  329.11   1 0.55944-0.55944 0.58558 0.15778-0.58661 0.81371
   0  18  -7 -206.53  309.23   1 0.42899-0.42899 0.13353 0.60965-0.89338 0.66654
   0  18   8  251.71  174.76   1-0.20341 0.20341 0.66711 0.07705-0.71664 0.97605
   0  18  -8 1405.11  530.90   1 0.27093-0.27093 0.08236 0.66118-0.95906 0.69959
   0  18   8  136.87  262.61   1 0.56208-0.56208 0.61144 0.13191-0.55694 0.81648
   0  18  -8  671.08  298.50   1 0.41535-0.41535 0.10148 0.64170-0.90398 0.64474
   0  18   9  776.21  211.28   1-0.23534 0.23534 0.69553 0.04863-0.67885 0.97069
   0  18  -9 1603.87  676.22   1 0.28894-0.28894 0.05382 0.68972-0.95583 0.66392
   0  18   9  953.99  344.25   1 0.56356-0.56356 0.63599 0.10716-0.52717 0.81909
   0  18  -9 1376.48  441.90   1 0.40171-0.40171 0.07051 0.67266-0.91304 0.62140
   0  18  10  -49.60  226.20   1-0.26552 0.26552 0.72128 0.02203-0.63972 0.96385
   0  18 -10  564.02  253.86   1 0.30533-0.30533 0.02730 0.71623-0.95185 0.62751
   0  18  10  -53.35  336.64   1 0.56445-0.56445 0.65920 0.08395-0.49682 0.82118
   0  18 -10  321.02  242.77   1 0.38820-0.38820 0.04080 0.70238-0.92067 0.59662
   0  18  11  519.55  140.36   1-0.29493 0.29493 0.74447-0.00115-0.59897 0.95551
   0  18 -11  962.90  473.37   1 0.32020-0.32020 0.00280 0.74074-0.94734 0.59056
   0  18  11 1452.63  504.21   1 0.56453-0.56453 0.68108 0.06206-0.46628 0.82307
   0  18 -11  614.10  190.20   1 0.37492-0.37492 0.01247 0.73071-0.92696 0.57051
   0  18  12  656.11  507.22   1-0.32290 0.32290 0.76500-0.02168-0.55723 0.94618
   0  18 -12  459.83  239.53   1 0.33363-0.33363-0.01970 0.76325-0.94249 0.55328
   0  18  12  905.51  395.85   1 0.56383-0.56383 0.70165 0.04149-0.43562 0.82484
   0  18 -12  916.53  282.43   1 0.36184-0.36184-0.01433 0.75777-0.93212 0.54299
   0  18  13  850.52  266.35   1-0.34934 0.34934 0.78290-0.03959-0.51479 0.93615
   0  18 -13  945.22  362.20   1 0.34574-0.34574-0.04016 0.78375-0.93746 0.51593
   0  18  13  740.12  317.10   1 0.56239-0.56239 0.72094 0.02221-0.40491 0.82657
   0  18 -13  504.45  286.69   1 0.34937-0.34937-0.03959 0.78303-0.93614 0.51458
   0  19   0  463.17  213.22   1 0.04954-0.04954 0.39242 0.39242-0.91844 0.91844
   0  19   0  788.83  347.69   1 0.52006-0.52006 0.39239 0.39239-0.75865 0.75865
   0  19   1  334.81  320.82   1 0.01855-0.01855 0.43044 0.35456-0.90242 0.93484
   0  19  -1  856.84  270.84   1 0.07936-0.07936 0.35460 0.43025-0.93164 0.89921
   0  19   1  668.28  350.15   1 0.52837-0.52837 0.42348 0.36131-0.73585 0.76829
   0  19  -1  451.52  351.58   1 0.51099-0.51099 0.36081 0.42397-0.78018 0.74775
   0  19   2 2963.60  815.18   1-0.01314 0.01314 0.46816 0.31684-0.88354 0.94838
   0  19  -2 1982.01  489.00   1 0.10796-0.10796 0.31724 0.46760-0.94217 0.87731
   0  19   2 3095.97  568.41   1 0.53573-0.53573 0.45389 0.33077-0.71201 0.77690
   0  19  -2 3554.54  475.95   1 0.50120-0.50120 0.32891 0.45587-0.80038 0.73550
   0  19   3  539.86  316.95   1-0.04545 0.04545 0.50530 0.27970-0.86174 0.95900
   0  19  -3  532.64  348.18   1 0.13520-0.13520 0.28067 0.50418-0.95023 0.85294
   0  19   3  597.20  414.19   1 0.54237-0.54237 0.48358 0.30108-0.68700 0.78433
   0  19  -3 1540.39  369.08   1 0.49077-0.49077 0.29685 0.48793-0.81915 0.72184
   0  19   4  312.06  253.69   1-0.07811 0.07811 0.54150 0.24350-0.83706 0.96674
   0  19  -4  605.90  174.87   1 0.16097-0.16097 0.24513 0.53971-0.95603 0.82631
   0  19   4  823.45  229.19   1 0.54815-0.54815 0.51238 0.27227-0.66105 0.79082
   0  19  -4  389.77  291.35   1 0.47977-0.47977 0.26482 0.51996-0.83647 0.70672
   0  19   5 1298.58  440.96   1-0.11106 0.11106 0.57656 0.20894-0.80946 0.97159
   0  19  -5 1602.00  389.45   1 0.18519-0.18519 0.21088 0.57397-0.95980 0.79766
   0  19   5  938.06  341.40   1 0.55304-0.55304 0.54021 0.24444-0.63427 0.79648
   0  19  -5 1574.14  510.76   1 0.46807-0.46807 0.23290 0.55156-0.85244 0.69041
   0  19   6  716.03  346.51   1-0.14366 0.14366 0.60988 0.17562-0.77935 0.97391
   0  19  -6  312.97  292.89   1 0.20780-0.20780 0.17806 0.60678-0.96182 0.76722
   0  19   6 -260.96  289.44   1 0.55707-0.55707 0.56700 0.21766-0.60677 0.80142
   0  19  -6  825.50  320.07   1 0.45626-0.45626 0.20151 0.58295-0.86672 0.67229
   0  19   7  784.16  306.02   1-0.17586 0.17586 0.64135 0.14415-0.74681 0.97380
   0  19  -7  949.48  359.97   1 0.22884-0.22884 0.14689 0.63796-0.96231 0.73527
   0  19   7 1522.96  573.50   1 0.56024-0.56024 0.59267 0.19198-0.57867 0.80577
   0  19  -7  301.27  184.52   1 0.44419-0.44419 0.17071 0.61375-0.87951 0.65268
   0  19   8  357.55  282.72   1-0.20741 0.20741 0.67075 0.11475-0.71208 0.97149
   0  19  -8  376.37  286.99   1 0.24829-0.24829 0.11743 0.66742-0.96153 0.70206
   0  19   8  551.14  216.72   1 0.56256-0.56257 0.61719 0.16746-0.55007 0.80961
   0  19  -8  297.08  239.45   1 0.43196-0.43196 0.14068 0.64379-0.89084 0.63161
   0  19   9   22.22  306.83   1-0.23810 0.23810 0.69791 0.08760-0.67544 0.96728
   0  19  -9  582.06  278.52   1 0.26620-0.26620 0.08976 0.69509-0.95972 0.66782
   0  19   9  865.20  200.93   1 0.56379-0.56379 0.64055 0.14388-0.52136 0.81328
   0  19  -9  620.32  294.97   1 0.41970-0.41970 0.11156 0.67290-0.90077 0.60913
   0  19  10  130.66  227.85   1-0.26717 0.26717 0.72261 0.06199-0.63752 0.96165
   0  19 -10 1072.33  334.74   1 0.28261-0.28261 0.06392 0.72093-0.95710 0.63276
   0  19  10  719.95  321.57   1 0.56452-0.56452 0.66272 0.12171-0.49204 0.81639
   0  19 -10  331.57  266.74   1 0.40750-0.40750 0.08352 0.70095-0.90937 0.58532
   0  20   0  942.82  376.54   1 0.03273-0.03273 0.41316 0.41316-0.91006 0.91006
   0  20   0 1389.06  369.92   1 0.52565-0.52565 0.41304 0.41304-0.74369 0.74369
   0  20   1  992.13  371.75   1 0.00321-0.00321 0.44885 0.37746-0.89359 0.92601
   0  20  -1  773.03  363.13   1 0.06146-0.06146 0.37744 0.44871-0.92398 0.89155
   0  20   1  583.28  366.67   1 0.53300-0.53300 0.44201 0.38408-0.72147 0.75391
   0  20  -1  537.88  258.94   1 0.51762-0.51762 0.38365 0.44244-0.76477 0.73233
   0  20   2  820.39  232.42   1-0.02706 0.02706 0.48432 0.34199-0.87446 0.93931
   0  20  -2  792.98  213.65   1 0.08896-0.08896 0.34219 0.48397-0.93540 0.87054
   0  20   2  843.17  311.07   1 0.53951-0.53951 0.47038 0.35557-0.69832 0.76321
   0  20  -2  153.01  178.13   1 0.50894-0.50894 0.35397 0.47212-0.78464 0.71977
   0  20   3 1103.35  374.11   1-0.05789 0.05789 0.51924 0.30707-0.85265 0.94992
   0  20  -3  670.67  288.80   1 0.11523-0.11523 0.30758 0.51857-0.94451 0.84722
   0  20   3  513.34  186.68   1 0.54538-0.54538 0.49814 0.32781-0.67409 0.77142
   0  20  -3  706.72  192.72   1 0.49969-0.49969 0.32415 0.50193-0.80326 0.70594
   0  20   4  635.30  328.33   1-0.08905 0.08905 0.55331 0.27300-0.82819 0.95788
   0  20  -4  907.68  307.45   1 0.14018-0.14018 0.27386 0.55229-0.95149 0.82177
   0  20   4  914.79  288.97   1 0.55048-0.55048 0.52514 0.30081-0.64899 0.77876
   0  20  -4   56.52  353.59   1 0.48993-0.48993 0.29435 0.53173-0.82056 0.69081
   0  20   5  409.12  204.17   1-0.12053 0.12053 0.58638 0.24046-0.80101 0.96314
   0  20  -5  298.66  253.79   1 0.16374-0.16374 0.24125 0.58490-0.95654 0.79439
   0  20   5  525.69  260.15   1 0.55479-0.55479 0.55128 0.27467-0.62312 0.78533
   0  20  -5   94.34  161.02   1 0.47973-0.47973 0.26473 0.56136-0.83652 0.67433
   0  20   6  911.54  314.26   1-0.15168 0.15168 0.61785 0.20899-0.77152 0.96608
   0  20  -6  624.88  400.66   1 0.18586-0.18586 0.20992 0.61624-0.95988 0.76531
   0  20   6  483.20  269.01   1 0.55833-0.55833 0.57651 0.24944-0.59657 0.79122
   0  20  -6  296.24  318.74   1 0.46896-0.46896 0.23533 0.59043-0.85128 0.65685
  -1   0   0  -17.99   71.88   1-0.05110-0.05110 0.51166-0.51166-0.85766 0.85766
   1   0   0  118.45   63.67   1 0.05109 0.05109 0.39048-0.39048-0.91918 0.91918
  -1   0   1 3541.54  217.71   1-0.26109 0.15896 0.71765-0.71765-0.64560 0.67801
   1   0  -1 3253.89  269.11   1-0.17943 0.28166 0.64476-0.64476-0.74302 0.71059
  -1   0  -1 4131.27  153.19   1 0.24892-0.35111 0.11647-0.11647-0.96149 0.92905
   1   0   1 3221.24  227.33   1 0.35270-0.25051-0.05218 0.05218-0.93427 0.96670
   1   0   1 3399.20  226.38   1 0.35285-0.25062-0.03259 0.03259-0.93510 0.96753
  -1   0   2185394.5 2964.67   1-0.37279 0.27066 0.79742-0.79742-0.47447 0.53930
   1   0  -2180561.0 2916.84   1-0.30201 0.40414 0.74981-0.74981-0.58869 0.52386
  -1   0  -2177812.5 2802.83   1 0.46440-0.56659-0.26434 0.26434-0.84525 0.78044
   1   0   2179568.7 2833.94   1 0.53412-0.43192-0.42769 0.42769-0.72924 0.79405
   1   0   2182791.3 2894.98   1 0.53185-0.42961 0.43731-0.43731-0.72517 0.79005
  -1   0  -2176767.0 2779.18   1 0.46852-0.57073 0.23413-0.23413-0.85185 0.78704
   1   0  -3239146.0 3802.92   1-0.36591 0.46804 0.79330-0.79330-0.48658 0.38934
  -1   0  -3249754.5 4151.76   1 0.55241-0.65461-0.47843 0.47843-0.68259 0.58529
   1   0   3246988.5 3892.04   1 0.59039-0.48819-0.61910 0.61910-0.51783 0.61513
   1   0   3252240.6 4194.69   1 0.56453-0.46232 0.66372-0.66372-0.49068 0.58799
  -1   0  -3240524.0 3802.88   1 0.54523-0.64742 0.49739-0.49739-0.67477 0.57744
  -1   0  -471633.81 1234.80   1 0.58303-0.68523-0.58436 0.58436-0.56444 0.43471
   1   0   471220.25 1230.53   1 0.60023-0.49799-0.71015 0.71015-0.36796 0.49767
   1   0   471751.64 1268.82   1 0.55637-0.45415 0.76120-0.76120-0.33320 0.46294
  -1   0  -469459.83 1178.98   1 0.56269-0.66487 0.61874-0.61874-0.54821 0.41844
  -1   0  -5 2692.05  373.14   1 0.59396-0.69620-0.63970 0.63970-0.48783 0.32569
   1   0   5 1657.44  256.58   1 0.59687-0.49463-0.75804 0.75804-0.26289 0.42509
   1   0  -5 1720.70  285.44   1 0.49692-0.39465-0.84445 0.84445 0.19991-0.36213
   1   0   5 2588.15  471.62   1 0.54190-0.43968 0.80889-0.80889-0.22811 0.39034
  -1   0  -5 1691.14  242.80   1 0.56455-0.66677 0.67910-0.67910-0.46913 0.30695
  -1   0  -6 9222.47  324.20   1 0.59802-0.70026-0.67095 0.67095-0.43838 0.24382
   1   0   6 9707.16  773.50   1 0.58937-0.48713-0.78629 0.78629-0.18540 0.38004
   1   0  -610187.27  962.30   1 0.51515-0.41289-0.84449 0.84449 0.14643-0.34110
   1   0   610452.18  678.84   1 0.52707-0.42485 0.83601-0.83601-0.15256 0.34724
  -1   0  -6 9550.85  346.66   1 0.56318-0.66540 0.71165-0.71165-0.41995 0.22534
  -1   0  -7 9695.82  582.05   1 0.59951-0.70175-0.68941 0.68941-0.40654 0.17955
   1   0   7 9651.16  470.82   1 0.58086-0.47862-0.80435 0.80435-0.12496 0.35204
   1   0  -711284.26 1276.93   1 0.52906-0.42679-0.84247 0.84247 0.10164-0.32876
   1   0   710969.22  843.66   1 0.51345-0.41124 0.85289-0.85289-0.09451 0.32164
  -1   0  -710663.69  364.82   1 0.56138-0.66360 0.73028-0.73028-0.38926 0.16222
  -1   0  -8 2110.72  269.55   1 0.60004-0.70228-0.70049 0.70049-0.38633 0.12691
   1   0   8 2073.32  221.53   1 0.57222-0.46998-0.81661 0.81661-0.07552 0.33505
   1   0  -8 3165.42  493.06   1 0.54010-0.43783-0.83924 0.83924 0.06287-0.32243
  -1   0  -8 2431.31  408.48   1 0.55994-0.66216 0.74109-0.74109-0.37045 0.11096
  -1   0  -9 5654.64  368.40   1 0.60020-0.70244-0.70697 0.70697-0.37409 0.08224
   1   0   9 5361.20  625.56   1 0.56363-0.46137-0.82534 0.82534-0.03349 0.32549
   1   0  -9 4401.08  368.18   1 0.54916-0.44689-0.83523 0.83523 0.02842-0.32042
  -1   0  -9 5510.90  714.42   1 0.55900-0.66122 0.74713-0.74713-0.35959 0.06767
  -1   0 -10   66.51  256.30   1 0.60024-0.70248-0.71038 0.71038-0.36750 0.04322
   1   0 -10  353.53  137.09   1 0.55676-0.45449-0.83066 0.83066-0.00284-0.32159
   1   0  10  404.56  179.86   1 0.55531-0.45304-0.83163 0.83163 0.00330 0.32114
  -1   0 -10  463.22  193.61   1 0.55851-0.66072 0.75002-0.75002-0.35429 0.02993
  -1   0 -11115133.6 1588.27   1 0.60024-0.70248-0.71164 0.71164-0.36504 0.00834
   1   0 -11113292.3 1203.61   1 0.56325-0.46098-0.82567 0.82567-0.03169-0.32519
   1   0  11107527.0 2893.62   1 0.54714-0.44488-0.83624 0.83624 0.03631 0.32057
  -1   0 -11112562.6 1881.13   1 0.55839-0.66060 0.75072-0.75072-0.35300-0.00377
  -1   0 -12 5043.11 1001.39   1 0.60024-0.70248-0.71131 0.71131-0.36570-0.02343
   1   0 -12 5333.72  718.48   1 0.56893-0.46669-0.82028 0.82028-0.05864-0.33064
   1   0  12 3731.03  582.94   1 0.53911-0.43684-0.83960 0.83960 0.06649 0.32284
  -1   0 -12 3560.69  759.56   1 0.55855-0.66077 0.74979-0.74979-0.35471-0.03450
  -1   0 -13  662.94  269.70   1 0.60023-0.70247-0.70974 0.70974-0.36875-0.05281
   1   0 -13 1163.97  336.21   1 0.57383-0.47159-0.81463 0.81463-0.08414-0.33758
  -1   0 -14 3313.88  619.86   1 0.60020-0.70244-0.70719 0.70719-0.37367-0.08031
   1   0 -14 3347.38  546.20   1 0.57814-0.47590-0.80869 0.80869-0.10844-0.34572
  -1   0 -15  392.29  173.83   1 0.60013-0.70237-0.70381 0.70381-0.38009-0.10632
   1   0 -15   95.15  267.63   1 0.58193-0.47969-0.80248 0.80248-0.13177-0.35483
  -1   0 -1633332.32 3152.99   1 0.60001-0.70225-0.69974 0.69974-0.38773-0.13111
   1   0 -1633280.66  917.24   1 0.58527-0.48303-0.79601 0.79601-0.15431-0.36474
  -1   0 -17 2263.70  454.29   1 0.59982-0.70206-0.69506 0.69506-0.39636-0.15491
   1   0 -17 3188.11  604.01   1 0.58822-0.48597-0.78927 0.78927-0.17617-0.37531
  -1   0 -18 2828.20  422.70   1 0.59954-0.70178-0.68982 0.68982-0.40582-0.17788
   1   0 -18 2368.55  367.95   1 0.59079-0.48855-0.78228 0.78228-0.19747-0.38645
  -1   0 -19  922.51  286.92   1 0.59916-0.70140-0.68408 0.68408-0.41597-0.20015
   1   0 -19  708.52  364.05   1 0.59303-0.49079-0.77502 0.77502-0.21829-0.39807
  -1   0 -20 3331.94  681.81   1 0.59866-0.70090-0.67787 0.67787-0.42671-0.22184
   1   0 -20 3079.57  783.56   1 0.59495-0.49271-0.76749 0.76749-0.23871-0.41010
  -1   0 -21  904.11  391.07   1 0.59804-0.70028-0.67121 0.67121-0.43795-0.24303
   1   0 -21 1213.77  431.25   1 0.59657-0.49433-0.75969 0.75969-0.25876-0.42248
  -1   0 -22  650.86  362.88   1 0.59728-0.69952-0.66413 0.66413-0.44963-0.26378
   1   0 -22 1190.00  410.39   1 0.59790-0.49565-0.75162 0.75162-0.27851-0.43517
  -1   0 -23 2748.78  774.20   1 0.59638-0.69862-0.65664 0.65664-0.46168-0.28416
   1   0 -23 4632.39 1364.16   1 0.59868-0.49644-0.74354 0.74354-0.29786-0.44798
  -1   0 -24  660.27  332.96   1 0.59531-0.69755-0.64874 0.64874-0.47405-0.30421
   1   0 -24  975.17  556.62   1 0.59946-0.49722-0.73490 0.73490-0.31710-0.46117
  -1   0 -25  804.38  411.45   1 0.59408-0.69632-0.64044 0.64044-0.48671-0.32398
   1   0 -25  474.97  442.66   1 0.59997-0.49773-0.72597 0.72597-0.33613-0.47456
  -1   0 -26 1384.81  458.27   1 0.59266-0.69490-0.63175 0.63175-0.49963-0.34349
   1   0 -26  144.44  305.36   1 0.60022-0.49798-0.71674 0.71674-0.35497-0.48815
   1   1   0111469.3 1760.19   1-0.21433 0.31655 0.67700-0.63566-0.70407 0.70407
  -1   1   0117377.0 1943.41   1 0.08234-0.18453 0.35076-0.30946-0.93283 0.93283
   1  -1   0107232.3 1747.74   1 0.15941-0.05722 0.24731-0.28862-0.95573 0.95573
  -1   1   136621.97  768.68   1-0.09764-0.00456 0.56249-0.52118-0.82101 0.85343
   1  -1  -134814.16  668.97   1-0.02106 0.12328 0.47739-0.51870-0.87843 0.84601
  -1  -1  -136266.01  585.32   1 0.10291-0.20510 0.32392-0.36523-0.94046 0.90803
  -1   1  -136669.51  668.02   1 0.27222-0.37441 0.08034-0.03903-0.95887 0.92644
   1  -1   136769.66  672.96   1 0.34579-0.24360-0.04024-0.00106-0.93744 0.96987
   1   1   135960.81  579.78   1 0.41570-0.31352-0.16673 0.20804-0.89408 0.92651
   1   1   136190.65  654.24   1 0.36400-0.26177-0.00990 0.05120-0.93134 0.96377
  -1  -1  -136450.54  655.33   1 0.29380-0.39604-0.14545 0.10415-0.94473 0.91230
   1  -1  -2291437.3 4812.20   1-0.15555 0.25778 0.62167-0.66301-0.76767 0.70282
  -1   1  -2299541.0 4930.90   1 0.41757-0.51976-0.17030 0.21161-0.89253 0.82768
   1  -1   2306329.0 5061.08   1 0.48103-0.37883-0.30018 0.25886-0.82371 0.88852
  -1  -1  -2301837.4 4906.11   1 0.54882-0.65102-0.46791 0.42658-0.69271 0.62784
   1   1   2304273.7 4951.90   1 0.60024-0.49800-0.71047 0.75180-0.36733 0.43219
   1   1  -2302551.3 5004.92   1 0.51486-0.41259-0.84451 0.88584 0.14733-0.21222
   1  -1   2301964.3 4899.00   1 0.53582-0.43361 0.82148-0.86278-0.19508 0.25997
   1   1   2308862.0 5118.57   1 0.48741-0.38517 0.28692-0.24561-0.82467 0.88955
  -1  -1  -2299293.6 4911.20   1 0.43042-0.53262 0.13696-0.17825-0.89217 0.82736
  -1   1   336852.80  728.52   1-0.32435 0.22222 0.76602-0.72473-0.55497 0.65221
   1  -1  -337006.05  726.77   1-0.24466 0.34689 0.70352-0.74486-0.66722 0.56994
  -1   1  -336763.92  712.30   1 0.50341-0.60561-0.35108 0.39239-0.78950 0.69228
   1  -1   334814.66  674.85   1 0.55435-0.45215-0.48424 0.44291-0.67690 0.77419
  -1  -1  -335944.20  641.44   1 0.59664-0.69888-0.65873 0.61740-0.45835 0.36107
   1   1   337107.39  657.23   1 0.58737-0.48513-0.79132 0.83267-0.16969 0.26701
   1   1  -334361.12  673.46   1 0.53227-0.43001-0.84169 0.88302 0.09067-0.18801
  -1   1  -336545.71  646.50   1 0.56156-0.66377 0.72881-0.68752-0.39176 0.29446
   1   1   334540.13  667.39   1 0.54553-0.44334 0.49891-0.45761-0.67340 0.77073
  -1  -1  -336927.24  697.02   1 0.50643-0.60867 0.34570-0.38700-0.78994 0.69263
   1  -1  -478016.92 1378.78   1-0.30214 0.40428 0.74991-0.79120-0.58850 0.45885
  -1   1  -477929.72 1372.79   1 0.54872-0.65092-0.46763 0.50896-0.69297 0.56325
   1  -1   480251.58 1427.86   1 0.58683-0.48463-0.60137 0.56004-0.54219 0.67192
  -1  -1  -480036.71 1465.26   1 0.60023-0.70247-0.71584 0.67451-0.35677 0.22706
   1   1   478612.22 1380.92   1 0.57303-0.47079-0.81563 0.85698-0.07983 0.20960
   1   1  -480703.27 1449.10   1 0.54362-0.44136-0.83784 0.87917 0.04978-0.17956
  -1   1  -478529.90 1312.06   1 0.55279-0.65501 0.77757-0.73627-0.29963 0.16985
   1   1   480612.14 1412.38   1 0.56356-0.46137 0.63116-0.58986-0.53294 0.66271
  -1  -1  -479053.61 1445.64   1 0.54148-0.64366 0.47938-0.52068-0.69064 0.56087
   1  -1  -520785.69  524.67   1-0.33978 0.44191 0.77661-0.81790-0.53049 0.36842
  -1   1  -523599.51  630.82   1 0.57180-0.67400-0.54092 0.58225-0.61679 0.45464
   1  -1   522971.92  543.50   1 0.59844-0.49620-0.67539 0.63406-0.43093 0.59307
  -1  -1  -522982.54  515.88   1 0.59912-0.70136-0.73904 0.69771-0.30799 0.14585
   1   1   521292.32  484.32   1 0.56175-0.45948-0.82693 0.86826-0.02483 0.18706
   1   1  -523200.35  844.69   1 0.55200-0.44974-0.83366 0.87499 0.01697-0.17920
  -1  -1   523201.22 1307.75   1 0.49192-0.59419-0.84400 0.80267 0.21369-0.05146
  -1   1  -522907.15  530.02   1 0.54730-0.64951 0.79521-0.75391-0.26096 0.09872
   1   1   522716.45 1228.57   1 0.56308-0.46087 0.71297-0.67168-0.41785 0.58002
  -1  -1  -523699.22  921.54   1 0.55636-0.65855 0.56193-0.60323-0.61210 0.44989
   1  -1  -663975.59 1292.36   1-0.36488 0.46701 0.79267-0.83397-0.48838 0.29390
  -1   1  -668349.55 1308.42   1 0.58383-0.68603-0.58782 0.62914-0.56000 0.36541
   1  -1   664425.87 1231.73   1 0.60005-0.49781-0.72386 0.68253-0.34052 0.53509
  -1  -1  -666813.49 1212.45   1 0.59819-0.70043-0.74950 0.70815-0.28355 0.08890
   1   1  -665364.85 1284.47   1 0.55868-0.45641-0.82930 0.87063-0.01116-0.18350
   1   1   664839.04 1196.94   1 0.55241-0.45014-0.83342 0.87475 0.01532 0.17933
  -1  -1   663708.00 1585.26   1 0.49374-0.59600-0.84418 0.80285 0.20873-0.01406
  -1   1  -666542.32 1394.81   1 0.54464-0.64686 0.80228-0.76098-0.24431 0.04963
   1   1   666364.74 1255.79   1 0.55552-0.45330 0.76511-0.72382-0.32556 0.52017
  -1  -1  -662902.04 1156.62   1 0.56230-0.66449 0.61394-0.65523-0.55397 0.35932
  -1   1  -725610.58  673.80   1 0.59028-0.69248-0.61854 0.65987-0.51861 0.29159
  -1  -1  -726041.43 1126.86   1 0.59748-0.69972-0.75434 0.71299-0.27196 0.04488
   1  -1   723454.56  656.70   1 0.59710-0.49486-0.75666 0.71531-0.26629 0.49338
   1   1  -725520.45  700.55   1 0.56425-0.46198-0.82480 0.86613-0.03636-0.19074
   1   1   724763.40  578.38   1 0.54417-0.44190-0.83761 0.87894 0.04773 0.17937
  -1  -1   723854.51  704.85   1 0.49364-0.59590-0.84417 0.80284 0.20899 0.01811
  -1   1  -725204.16  580.84   1 0.54371-0.64593 0.80460-0.76330-0.23870 0.01157
   1   1   724493.86  802.99   1 0.54567-0.44346 0.79962-0.75832-0.25066 0.47779
  -1  -1  -725494.47  858.15   1 0.56411-0.66633 0.64775-0.68904-0.51203 0.28499
  -1   1  -810132.07  672.07   1 0.59384-0.69608-0.63894 0.68027-0.48897 0.22954
  -1  -1  -811822.74  697.28   1 0.59722-0.69946-0.75596 0.71461-0.26802 0.00849
   1   1  -810675.33  748.51   1 0.56913-0.46689-0.82007 0.86142-0.05964-0.19987
   1   1   810784.09  642.81   1 0.53657-0.43430-0.84045 0.88178 0.07563 0.18392
   1  -1  -810575.24  474.02   1 0.50396-0.40170-0.84478 0.80345 0.17986-0.43942
  -1  -1   8 9501.62  772.21   1 0.49226-0.59453-0.84403 0.80270 0.21276 0.04678
   1  -1  -810875.75 1112.28   1 0.51173-0.40951 0.85465-0.89596-0.08767-0.17190
   1   1   812780.26 1387.07   1 0.53451-0.43230 0.82389-0.78259-0.18837 0.44795
  -1   1  -811302.48 1193.19   1 0.54382-0.64604 0.80433-0.76303-0.23937-0.02020
  -1  -1  -810236.67  875.07   1 0.56459-0.66680 0.66989-0.71118-0.48215 0.22267
  -1   1  -924344.02  665.35   1 0.59586-0.69810-0.65268 0.69401-0.46791 0.17606
  -1  -1  -923591.56  996.91   1 0.59728-0.69952-0.75558 0.71423-0.26895-0.02300
   1  -1   923460.42  634.82   1 0.58478-0.48254-0.79703 0.75568-0.15084 0.44281
   1   1  -925801.81  829.45   1 0.57334-0.47110-0.81524 0.85659-0.08150-0.21046
   1   1   923691.38  703.49   1 0.52934-0.42708-0.84241 0.88374 0.10068 0.19132
   1  -1  -927724.47  983.66   1 0.51900-0.41674-0.84413 0.80280 0.13441-0.42641
   1  -1  -924517.68  814.94   1 0.51636-0.41414 0.84974-0.89105-0.10626-0.18576
   1   1   925365.41  688.97   1 0.52322-0.42101 0.84138-0.80007-0.13532 0.42734
  -1   1  -925069.89  740.40   1 0.54458-0.64680 0.80244-0.76113-0.24395-0.04806
  -1  -1  -923970.47 1333.61   1 0.56447-0.66668 0.68456-0.72584-0.46124 0.16932
  -1   1 -1010275.83 1422.72   1 0.59701-0.69925-0.66177 0.70310-0.45345 0.12917
  -1  -1 -10 9988.82 1386.17   1 0.59756-0.69980-0.75384 0.71249-0.27319-0.05121
   1  -1  10 6986.39  973.13   1 0.57742-0.47518-0.80976 0.76841-0.10424 0.42865
   1   1 -10 8431.97  506.89   1 0.57709-0.47485-0.81023 0.85158-0.10234-0.22205
   1  -1 -10 8562.55  534.47   1 0.53137-0.42911-0.84192 0.80059 0.09376-0.41821
   1   1  10 9005.06  408.04   1 0.52233-0.42006-0.84370 0.88503 0.12381 0.20063
   1   1  1010503.82 1403.20   1 0.51209-0.40987 0.85429-0.81299-0.08910 0.41357
   1  -1 -10 7944.82  488.89   1 0.52071-0.41849 0.84461-0.88591-0.12443-0.20003
  -1   1 -10 8608.85  395.49   1 0.54575-0.64797 0.79942-0.75812-0.25113-0.07333
  -1  -1 -10 8550.63  969.78   1 0.56418-0.66639 0.69414-0.73542-0.44706 0.12271
  -1   1 -11 2350.30  338.27   1 0.59766-0.69990-0.66754 0.70887-0.44404 0.08733
  -1  -1 -11 3266.90  478.47   1 0.59797-0.70021-0.75110 0.70975-0.27975-0.07709
   1   1 -11 2652.33  457.18   1 0.58045-0.47821-0.80503 0.84638-0.12244-0.23440
   1  -1  11 1908.46  330.74   1 0.56974-0.46750-0.81942 0.77807-0.06272 0.41957
   1  -1 -11 3348.81  402.26   1 0.54173-0.43947-0.83862 0.79729 0.05686-0.41375
   1   1  11 2624.38  421.20   1 0.51543-0.41316-0.84447 0.88580 0.14559 0.21129
  -1   1 -11 3159.26  425.68   1 0.54717-0.64938 0.79557-0.75427-0.26012-0.09679
  -1  -1 -11 2688.26  402.70   1 0.56391-0.66612 0.70011-0.74140-0.43799 0.08120
  -1   1 -1222757.20 1031.55   1 0.59801-0.70025-0.67085 0.71218-0.43855 0.04942
  -1  -1 -1221125.32 1148.85   1 0.59844-0.70068-0.74759 0.70624-0.28802-0.10126
   1   1 -1221807.44  989.78   1 0.58348-0.48124-0.79962 0.84097-0.14196-0.24732
   1  -1 -1224275.77 1100.79   1 0.55054-0.44827-0.83449 0.79316 0.02290-0.41224
   1   1  1223240.42 1020.69   1 0.50856-0.40629-0.84479 0.88612 0.16639 0.22294
  -1   1 -1222464.40  932.28   1 0.54873-0.65095 0.79104-0.74974-0.27043-0.11892
  -1  -1 -1221551.56 1380.68   1 0.56373-0.66594 0.70343-0.74471-0.43288 0.04366
  -1   1 -13 4244.81  617.99   1 0.59815-0.70039-0.67228 0.71360-0.43617 0.01461
  -1  -1 -13 4357.66  710.13   1 0.59866-0.70090-0.74370 0.70237-0.29749-0.12407
   1   1 -13 5273.95  529.11   1 0.58621-0.48397-0.79399 0.83534-0.16102-0.26070
   1  -1 -13 3517.74  422.47   1 0.55811-0.45584-0.82971 0.78838-0.00868-0.41309
  -1   1 -1410409.88  795.59   1 0.59814-0.70038-0.67221 0.71354-0.43628-0.01770
  -1  -1 -1413025.97  749.96   1 0.59912-0.70136-0.73902 0.69769-0.30804-0.14594
   1   1 -1412485.38  781.93   1 0.58866-0.48642-0.78814 0.82949-0.17971-0.27445
   1  -1 -1413717.30 2124.91   1 0.56467-0.46241-0.82441 0.78308-0.03835-0.41586
  -1   1 -15  817.21  283.18   1 0.59801-0.70025-0.67094 0.71227-0.43841-0.04801
  -1  -1 -15 2210.03  481.72   1 0.59953-0.70177-0.73385 0.69253-0.31937-0.16704
   1   1 -15 1418.51  510.18   1 0.59086-0.48862-0.78206 0.82341-0.19811-0.28849
   1  -1 -15  920.59  430.60   1 0.57046-0.46822-0.81863 0.77728-0.06637-0.42023
  -1   1 -16 4206.53  844.78   1 0.59778-0.70002-0.66866 0.70999-0.44219-0.07665
  -1  -1 -16 5292.63  699.06   1 0.59987-0.70211-0.72826 0.68693-0.33134-0.18750
   1   1 -16 4075.53  486.51   1 0.59282-0.49058-0.77574 0.81709-0.21627-0.30278
   1  -1 -16 4735.16  642.95   1 0.57547-0.47323-0.81249 0.77114-0.09316-0.42589
  -1   1 -17 5625.43  779.10   1 0.59744-0.69968-0.66552 0.70685-0.44736-0.10391
  -1  -1 -17 5379.52  848.57   1 0.60010-0.70234-0.72225 0.68093-0.34382-0.20745
   1   1 -17 8181.92 1402.85   1 0.59455-0.49231-0.76918 0.81053-0.23422-0.31726
   1  -1 -17 6296.71  748.27   1 0.57987-0.47763-0.80599 0.76464-0.11883-0.43265
  -1   1 -18 8147.79 1183.27   1 0.59699-0.69923-0.66163 0.70296-0.45368-0.13002
  -1  -1 -18 7484.11 1088.31   1 0.60023-0.70247-0.71587 0.67454-0.35672-0.22698
   1   1 -18 8758.80 1522.87   1 0.59605-0.49381-0.76237 0.80372-0.25200-0.33192
   1  -1 -18 9460.89  687.71   1 0.58372-0.48148-0.79915 0.75780-0.14358-0.44034
  -1   1 -19 2223.51  529.08   1 0.59643-0.69867-0.65708 0.69841-0.46097-0.15515
  -1  -1 -19 1814.44  550.09   1 0.60023-0.70246-0.70911 0.66778-0.36997-0.24615
   1   1 -19 1634.75  620.93   1 0.59733-0.49509-0.75530 0.79665-0.26964-0.34673
   1  -1 -19  961.54  386.24   1 0.58709-0.48485-0.79199 0.75064-0.16753-0.44883
  -1   1 -20  506.49  312.71   1 0.59575-0.69799-0.65192 0.69325-0.46911-0.17944
  -1  -1 -20 2229.14  609.20   1 0.60008-0.70232-0.70200 0.66067-0.38352-0.26503
   1   1 -20 1504.69  488.03   1 0.59839-0.49615-0.74797 0.78932-0.28715-0.36165
   1  -1 -20 1534.66  475.50   1 0.59002-0.48778-0.78451 0.74316-0.19080-0.45800
  -1   1 -21 1838.01  961.26   1 0.59495-0.69719-0.64621 0.68753-0.47796-0.20302
  -1  -1 -21 1800.25  489.95   1 0.59979-0.70203-0.69453 0.65320-0.39732-0.28366
   1   1 -21 2394.08  554.10   1 0.59898-0.49674-0.74063 0.78195-0.30444-0.37654
   1  -1 -21 2029.53  573.68   1 0.59254-0.49030-0.77673 0.73538-0.21348-0.46777
  -1   1 -22  894.10  259.50   1 0.59400-0.69624-0.63997 0.68130-0.48743-0.22598
  -1  -1 -22   77.45  325.49   1 0.59934-0.70158-0.68671 0.64539-0.41134-0.30207
   1   1 -22  178.30  357.18   1 0.59961-0.49737-0.73276 0.77408-0.32174-0.39166
   1  -1 -22   22.72  401.83   1 0.59468-0.49244-0.76865 0.72730-0.23564-0.47805
  -1   1 -23  951.93  429.96   1 0.59291-0.69515-0.63324 0.67457-0.49743-0.24840
  -1  -1 -23  778.66  424.94   1 0.59872-0.70096-0.67855 0.63722-0.42555-0.32029
   1   1 -23  630.32  314.60   1 0.60003-0.49779-0.72461 0.76593-0.33897-0.40687
   1  -1 -23  325.97  279.67   1 0.59646-0.49422-0.76026 0.71891-0.25735-0.48878
  -1   1 -24  760.99  304.47   1 0.59167-0.69391-0.62605 0.66737-0.50791-0.27035
  -1  -1 -24  124.86  361.71   1 0.59792-0.70016-0.67004 0.62871-0.43991-0.33835
   1   1 -24 1308.93  430.68   1 0.60022-0.49798-0.71616 0.75749-0.35612-0.42214
   1  -1 -24 1004.73  345.66   1 0.59790-0.49566-0.75156 0.71021-0.27866-0.49990
  -1   1 -25  301.20  371.65   1 0.59025-0.69246-0.61840 0.65973-0.51881-0.29197
  -1  -1 -25  686.08  331.65   1 0.59694-0.69918-0.66117 0.61984-0.45442-0.35627
   1   1 -25  777.71  530.00   1 0.60020-0.49796-0.70743 0.74875-0.37321-0.43748
   1  -1 -25  255.61  473.75   1 0.59875-0.49651-0.74283 0.70150-0.29947-0.51122
  -1   1 -26  385.00  214.83   1 0.58867-0.69088-0.61030 0.65163-0.53008-0.31314
  -1  -1 -26  400.75  344.30   1 0.59576-0.69800-0.65195 0.61062-0.46906-0.37406
   1   1 -26  833.82  399.21   1 0.59996-0.49772-0.69838 0.73971-0.39025-0.45287
   1  -1 -26  955.36  497.41   1 0.59956-0.49732-0.73351 0.69219-0.32011-0.52301
  -1   2   0  449.76  185.48   1 0.13863-0.24082 0.27599-0.19337-0.95110 0.95110
   1  -2   0  258.12  125.64   1 0.21722-0.11503 0.16418-0.24680-0.96221 0.96221
   1   2   0  205.32   67.89   1 0.59196-0.48972-0.62769 0.71034-0.50554 0.50554
  -1  -2   0  562.18   88.11   1 0.57410-0.67634-0.81429 0.73159-0.08560 0.08560
  -1   2   0  203.19   53.57   1 0.55044-0.65266 0.78569-0.70309-0.28229 0.28229
   1  -2   0  296.05   60.61   1 0.55971-0.45752 0.58797-0.67056-0.58395 0.58395
   1   2   0  288.38  150.40   1 0.25596-0.15372-0.21222 0.29483-0.94310 0.94310
  -1   2   159132.12 1062.14   1-0.00303-0.09917 0.45627-0.37363-0.88983 0.92225
   1  -2  -159379.76 1052.50   1 0.07996 0.02222 0.35383-0.43644-0.93188 0.89945
  -1   2  -159571.53 1076.64   1 0.27542-0.37761 0.07530 0.00730-0.95836 0.92593
   1  -2   157957.95 1032.26   1 0.34925-0.24706-0.04621-0.03640-0.93588 0.96831
   1   2  -157467.52  993.38   1 0.59852-0.49628-0.74499 0.82765-0.29452 0.26209
  -1  -2   159774.71 1006.46   1 0.56462-0.66689-0.82446 0.74180-0.03812 0.07056
  -1   2   158293.57  975.41   1 0.52989-0.63210 0.83171-0.74911-0.16570 0.19815
   1  -2  -160075.89 1016.25   1 0.56093-0.45872 0.73391-0.81648-0.38303 0.35059
  -1   2  -159940.60  948.62   1 0.55525-0.65744 0.55431-0.47171-0.62002 0.58757
   1   2   158577.14 1047.07   1 0.37439-0.27219 0.01135 0.07121-0.92719 0.95960
   1  -2   156646.28  904.47   1 0.33934-0.23710-0.05947-0.02312-0.93878 0.97120
  -1  -2  -157947.88 1030.39   1 0.30728-0.40951-0.12069 0.03808-0.94393 0.91150
   1  -2  -3103286.1 1849.83   1-0.13405 0.23628 0.60021-0.68289-0.78852 0.69124
  -1   2  -3106507.6 1822.18   1 0.46315-0.56534-0.26171 0.34434-0.84675 0.74954
   1  -2   3106303.3 1798.85   1 0.52337-0.42117-0.39975 0.31713-0.75251 0.84972
   1   2  -3105681.3 1774.58   1 0.58946-0.48722-0.78603 0.86874-0.18619 0.08887
  -1  -2  -3105391.1 1688.23   1 0.56196-0.66423-0.82675 0.74409-0.02580-0.07152
  -1  -2   3106416.3 1761.16   1 0.55333-0.65560-0.83287 0.75021 0.01154 0.08579
   1  -2  -3102923.2 1717.77   1 0.54485-0.44264 0.80175-0.88435-0.24560 0.14826
   1   2   3104776.8 1785.63   1 0.52252-0.42028 0.40134-0.31873-0.75225 0.84957
  -1  -2  -3105816.2 1787.66   1 0.47362-0.57586 0.24758-0.33019-0.84521 0.74789
  -1   2   4126026.6 2159.22   1-0.30366 0.20152 0.75104-0.66845-0.58628 0.71593
  -1   2  -4133898.5 2264.03   1 0.51259-0.61479-0.37303 0.45565-0.77336 0.64374
   1  -2   4132614.4 2223.32   1 0.56484-0.46264-0.51714 0.43448-0.64304 0.77277
   1   2  -4137473.7 2308.76   1 0.58771-0.48547-0.79051 0.87321-0.17226 0.04250
  -1  -2  -4135907.6 2209.53   1 0.56846-0.67070-0.82077 0.73807-0.05630-0.07345
  -1  -2   4128852.0 2151.97   1 0.54840-0.65066-0.83562 0.75296 0.03140 0.09836
   1  -2  -4133256.8 2320.79   1 0.54081-0.43859 0.81135-0.89395-0.22189 0.09210
   1   2   4131194.9 2216.16   1 0.55174-0.44955 0.53242-0.44982-0.64195 0.77171
  -1  -2  -4135330.6 2255.76   1 0.51412-0.61637 0.37148-0.45409-0.77309 0.64334
  -1   2   5 3650.92  693.50   1-0.36066 0.25853 0.79008-0.70749-0.49567 0.65773
   1  -2  -5 3881.90  483.30   1-0.25314 0.35536 0.71066-0.79334-0.65641 0.49427
  -1   2  -5 3755.98  574.67   1 0.54331-0.64551-0.45225 0.53490-0.70730 0.54514
   1  -2   5 3490.76  424.10   1 0.58684-0.48464-0.60145 0.51879-0.54209 0.70425
   1   2  -5 3539.98  279.68   1 0.58716-0.48491-0.79183 0.87453-0.16803 0.00583
  -1  -2  -5 3591.27  210.10   1 0.57301-0.67525-0.81565 0.73295-0.07971-0.08248
  -1  -2   5 3570.47  251.47   1 0.54354-0.64580-0.83788 0.75522 0.05011 0.11211
   1  -2  -5 3127.47  652.58   1 0.53871-0.43649 0.81581-0.89842-0.21031 0.04807
   1   2   5 3381.31  454.47   1 0.56322-0.46104 0.62606-0.54346-0.53927 0.70148
  -1  -2  -5 3603.26  375.79   1 0.53717-0.63935 0.46004-0.54264-0.70696 0.54475
   1  -2  -611830.89  643.87   1-0.28893 0.39106 0.73986-0.82246-0.60754 0.41306
  -1   2  -611349.33  393.13   1 0.56203-0.66423-0.50804 0.59070-0.65268 0.45809
   1  -2   612108.25  952.56   1 0.59703-0.49479-0.66193 0.57927-0.45320 0.64777
   1   2  -611823.52  447.42   1 0.58735-0.48511-0.79138 0.87409-0.16947-0.02516
  -1  -2  -612483.93  394.81   1 0.57672-0.67896-0.81077 0.72807-0.10018-0.09445
  -1  -2   611945.36  420.28   1 0.53866-0.64092-0.83976 0.75710 0.06813 0.12652
   1  -2  -610956.13  456.06   1 0.53792-0.43570 0.81741-0.90001-0.20609 0.01140
   1   2   610717.40 1152.56   1 0.56422-0.46200 0.69302-0.61045-0.44873 0.64334
  -1  -2  -611991.25  600.16   1 0.54993-0.65212 0.52209-0.60468-0.65191 0.45725
   1  -2  -7 7427.87  907.16   1-0.31484 0.41698 0.75925-0.84184-0.56956 0.34267
  -1   2  -7 8112.68  377.66   1 0.57365-0.67585-0.54756 0.63022-0.60917 0.38215
   1  -2   7 7720.73  428.79   1 0.60018-0.49794-0.70605 0.62340-0.37584 0.60283
   1   2  -7 7412.14  436.42   1 0.58800-0.48576-0.78980 0.87250-0.17451-0.05256
  -1  -2  -7 8368.76  746.90   1 0.57993-0.68217-0.80589 0.72318-0.11922-0.10785
  -1  -2   7 7578.32  367.96   1 0.53370-0.63597-0.84131 0.75865 0.08573 0.14137
   1  -2  -7 7815.62 1022.58   1 0.53803-0.43581 0.81720-0.89980-0.20665-0.02047
   1   2   7 8956.07  558.23   1 0.55992-0.45770 0.74128-0.65870-0.37012 0.59716
  -1  -2  -7 7932.28  376.23   1 0.55692-0.65910 0.56587-0.64846-0.60797 0.38087
   1  -2  -824163.89 1041.85   1-0.33363 0.43577 0.77245-0.85504-0.54036 0.28106
  -1   2  -822410.50  647.56   1 0.58097-0.68317-0.57575 0.65841-0.57530 0.31584
   1  -2   822208.23  643.19   1 0.59914-0.49690-0.73882 0.65616-0.30848 0.56791
   1   2  -822902.46  706.88   1 0.58895-0.48671-0.78741 0.87011-0.18198-0.07754
  -1  -2  -822980.17  605.61   1 0.58280-0.68504-0.80089 0.71819-0.13745-0.12206
  -1  -2   821543.91 1644.39   1 0.52864-0.63091-0.84256 0.75990 0.10304 0.15651
  -1   2  -824479.27  586.42   1 0.51325-0.61546 0.85310-0.77050-0.09368-0.16588
   1  -2  -825649.06  716.82   1 0.53874-0.43652 0.81574-0.89835-0.21049-0.04907
   1   2   824342.17 1016.07   1 0.55308-0.45086 0.77652-0.69391-0.30184 0.56142
  -1  -2  -822485.55  747.50   1 0.56070-0.66289 0.59698-0.67957-0.57377 0.31423
   1  -2  -925569.43  939.92   1-0.34724 0.44937 0.78154-0.86413-0.51827 0.22656
  -1   2  -927809.61 1262.24   1 0.58566-0.68786-0.59597 0.67863-0.54937 0.25749
   1  -2   926729.26  699.86   1 0.59583-0.49359-0.76342 0.68072-0.24929 0.54126
   1   2  -926755.44  752.85   1 0.59006-0.48782-0.78440 0.86710-0.19115-0.10080
  -1  -2  -928180.63  711.50   1 0.58540-0.68764-0.79575 0.71304-0.15519-0.13677
  -1  -2   923923.73  973.82   1 0.52346-0.62573-0.84353 0.76087 0.12014 0.17185
  -1   2  -929290.98  688.37   1 0.51916-0.62137 0.84651-0.76390-0.11785-0.17416
   1  -2  -924712.92  661.16   1 0.53987-0.43765 0.81337-0.89597-0.21668-0.07533
   1   2   927759.87 1112.40   1 0.54428-0.44207 0.80319-0.72059-0.24213 0.53415
  -1  -2  -928334.21  869.79   1 0.56272-0.66491 0.61919-0.70179-0.54765 0.25567
   1  -2 -10 8422.97  773.68   1-0.35701 0.45914 0.78780-0.87039-0.50190 0.17778
  -1   2 -1010078.50 1310.96   1 0.58870-0.69090-0.61043 0.69309-0.52989 0.20557
   1   2 -10 8544.94  502.59   1 0.59125-0.48901-0.78088 0.86358-0.20158-0.12282
   1  -2  10 8661.11  432.05   1 0.59071-0.48847-0.78250 0.69980-0.19680 0.52120
  -1  -2 -10 8739.09  483.17   1 0.58775-0.68999-0.79041 0.70771-0.17259-0.15181
  -1  -2  10 7359.39  904.83   1 0.51815-0.62042-0.84422 0.76156 0.13710 0.18734
   1  -2 -10 9047.92  499.75   1 0.50230-0.40003-0.84474 0.76208 0.18467-0.50912
  -1   2 -10 8714.40  480.79   1 0.52433-0.62655 0.83988-0.75728-0.14021-0.18425
   1   2  1010189.17  828.43   1 0.53469-0.43247 0.82358-0.74097-0.18926 0.51373
   1  -2 -10 8798.57  958.53   1 0.54129-0.43907 0.81028-0.89288-0.22460-0.09986
  -1  -2 -10 8014.38 1116.40   1 0.56378-0.66597 0.63503-0.71763-0.52807 0.20365
  -1   2 -11  384.47  233.58   1 0.59068-0.69292-0.62061 0.70326-0.51568 0.15897
  -1  -2 -11  346.00  159.58   1 0.58989-0.69213-0.78486 0.70216-0.18976-0.16707
   1   2 -11  957.58  415.89   1 0.59248-0.49024-0.77692 0.85962-0.21295-0.14389
   1  -2  11  765.30  228.24   1 0.58461-0.48237-0.79739 0.71469-0.14964 0.50649
   1  -2 -11  806.11  313.11   1 0.51690-0.41464-0.84434 0.76168 0.14101-0.49790
   1   2  11 1039.87  298.52   1 0.52470-0.42249 0.83937-0.75677-0.14187 0.49879
  -1   2 -11  611.43  181.03   1 0.52895-0.63117 0.83317-0.75057-0.16131-0.19560
  -1  -2 -11  123.89   91.02   1 0.56406-0.66627 0.64641-0.72898-0.51379 0.15700
  -1   2 -12 2115.84  363.50   1 0.59195-0.69419-0.62764 0.71029-0.50561 0.11647
   1   2 -12 1597.05  322.08   1 0.59369-0.49145-0.77257 0.85527-0.22505-0.16423
  -1  -2 -12  907.48  200.61   1 0.59182-0.69406-0.77908 0.69638-0.20677-0.18251
   1  -2 -12 1407.35  332.69   1 0.52925-0.42698-0.84243 0.75977 0.10100-0.49033
   1   2  12 1702.43  408.30   1 0.51455-0.41234 0.85173-0.76912-0.09891 0.48828
  -1   2 -12 1142.08  211.04   1 0.53314-0.63536 0.82631-0.74371-0.18152-0.20784
  -1   2 -1314241.68 1783.92   1 0.59274-0.69498-0.63219 0.71484-0.49898 0.07742
  -1  -2 -1316846.68 1961.76   1 0.59356-0.69580-0.77308 0.69038-0.22366-0.19806
   1   2 -1315537.15 1872.66   1 0.59486-0.49262-0.76786 0.85056-0.23773-0.18399
   1  -2 -1316606.90 2531.00   1 0.53980-0.43753-0.83935 0.75669 0.06399-0.48577
  -1   2 -14 3694.87  556.07   1 0.59317-0.69541-0.63477 0.71743-0.49518 0.04118
   1   2 -14 2264.90  819.30   1 0.59596-0.49372-0.76281 0.84551-0.25086-0.20330
  -1  -2 -14 3947.92  912.42   1 0.59510-0.69734-0.76683 0.68413-0.24045-0.21371
   1  -2 -14 4400.29  806.00   1 0.54889-0.44663-0.83536 0.75270 0.02945-0.48368
  -1   2 -15 1830.93  501.33   1 0.59333-0.69557-0.63576 0.71841-0.49371 0.00729
   1   2 -15  404.18  237.47   1 0.59697-0.49473-0.75744 0.84014-0.26437-0.22223
  -1  -2 -15  620.52  203.31   1 0.59645-0.69869-0.76033 0.67763-0.25717-0.22944
   1  -2 -15  413.20  256.19   1 0.55679-0.45453-0.83064 0.74798-0.00301-0.48365
  -1   2 -16 2607.44  520.19   1 0.59327-0.69551-0.63543 0.71808-0.49421-0.02463
   1   2 -16 1096.86  533.08   1 0.59788-0.49564-0.75176 0.83446-0.27819-0.24085
  -1  -2 -16 2188.79  454.24   1 0.59760-0.69984-0.75357 0.67087-0.27382-0.24522
   1  -2 -16 1575.03  399.71   1 0.56369-0.46142-0.82529 0.74263-0.03374-0.48536
  -1   2 -17 1925.28  477.47   1 0.59303-0.69527-0.63398 0.71663-0.49635-0.05492
   1   2 -17 1203.30  422.74   1 0.59840-0.49616-0.74601 0.82866-0.29218-0.25909
  -1  -2 -17 1000.30  273.20   1 0.59830-0.70054-0.74682 0.66417-0.29030-0.26097
   1  -2 -17 1508.85  487.53   1 0.56978-0.46754-0.81938 0.73667-0.06291-0.48857
  -1   2 -1818162.23 2342.73   1 0.59263-0.69487-0.63157 0.71422-0.49989-0.08381
  -1  -2 -1819182.68  803.00   1 0.59908-0.70132-0.73954 0.65689-0.30687-0.27683
   1   2 -1819734.23  856.39   1 0.59906-0.49682-0.73972 0.82237-0.30647-0.27723
   1  -2 -1819453.08 2958.14   1 0.57507-0.47283-0.81302 0.73032-0.09093-0.49299
  -1   2 -19 7399.86 1251.99   1 0.59207-0.69431-0.62832 0.71098-0.50462-0.11150
  -1  -2 -19 8559.04 1097.00   1 0.59966-0.70190-0.73199 0.64934-0.32340-0.29272
   1   2 -19 6986.71 1305.81   1 0.59958-0.49734-0.73313 0.81578-0.32094-0.29518
   1  -2 -19 7914.14  857.97   1 0.57971-0.47747-0.80624 0.72354-0.11787-0.49849
  -1   2 -20 5937.66 1212.55   1 0.59136-0.69360-0.62432 0.70698-0.51039-0.13816
   1   2 -20 4524.12 1015.68   1 0.59996-0.49772-0.72624 0.80889-0.33557-0.31298
  -1  -2 -20 4886.94  775.90   1 0.60004-0.70228-0.72415 0.64150-0.33991-0.30864
   1  -2 -20 6041.61  622.52   1 0.58377-0.48153-0.79906 0.71636-0.14389-0.50492
  -1   2 -21 1874.87  519.34   1 0.59049-0.69269-0.61966 0.70232-0.51703-0.16403
   1   2 -21 2179.57  486.02   1 0.60018-0.49794-0.71904 0.80170-0.35034-0.33064
  -1  -2 -21 2245.52  513.99   1 0.60023-0.70247-0.71603 0.63338-0.35639-0.32459
   1  -2 -21 3268.79  604.65   1 0.58730-0.48506-0.79150 0.70880-0.16909-0.51216
  -1   2 -22  636.25  435.66   1 0.58948-0.69168-0.61436 0.69702-0.52446-0.18903
   1   2 -22  559.58  324.49   1 0.60024-0.49800-0.71155 0.79420-0.36523-0.34818
  -1  -2 -22  628.69  280.31   1 0.60021-0.70245-0.70761 0.62496-0.37285-0.34055
   1  -2 -22  114.97  417.21   1 0.59034-0.48810-0.78358 0.70088-0.19359-0.52010
  -1   2 -23 1026.69  349.75   1 0.58831-0.69051-0.60848 0.69114-0.53257-0.21335
  -1  -2 -23  787.20  479.26   1 0.59998-0.70222-0.69889 0.61624-0.38930-0.35653
   1   2 -23 -184.70  311.07   1 0.60013-0.49789-0.70374 0.78640-0.38023-0.36561
   1  -2 -23  934.66  432.42   1 0.59294-0.49070-0.77531 0.69261-0.21747-0.52866
  -1   2 -24  486.16  418.37   1 0.58697-0.68917-0.60205 0.68471-0.54128-0.23707
   1   2 -24 1636.56  520.43   1 0.59984-0.49760-0.69563 0.77828-0.39531-0.38295
  -1  -2 -24  713.97  357.65   1 0.59954-0.70178-0.68987 0.60721-0.40573-0.37253
   1  -2 -24  880.27  400.09   1 0.59513-0.49289-0.76670 0.68399-0.24080-0.53777
  -1   2 -25  992.33  365.41   1 0.58547-0.68767-0.59510 0.67776-0.55052-0.26027
  -1  -2 -25  821.05  336.51   1 0.59888-0.70112-0.68052 0.59787-0.42215-0.38854
   1   2 -25 1248.94  464.13   1 0.59937-0.49713-0.68720 0.76985-0.41048-0.40021
   1  -2 -25  375.58  420.81   1 0.59692-0.49468-0.75773 0.67503-0.26365-0.54736
  -1   2 -26  947.76  505.45   1 0.58379-0.68599-0.58765 0.67031-0.56022-0.28300
   1   2 -26 1175.22  430.76   1 0.59871-0.49647-0.67845 0.76110-0.42572-0.41740
  -1  -2 -26  756.62  342.22   1 0.59801-0.70025-0.67085 0.58820-0.43856-0.40456
  -1   3   0 1503.05  278.68   1 0.16470-0.26689 0.23991-0.11599-0.95671 0.95671
   1  -3   0  490.31  126.71   1 0.25540-0.15321 0.10651-0.23044-0.96094 0.96094
   1   3   0  763.58  132.50   1 0.47539-0.37320-0.28787 0.41181-0.83133 0.83133
  -1  -3   0 1043.71  169.62   1 0.58312-0.68532-0.58477 0.46079-0.56391 0.56391
  -1   3   0  830.28  184.14   1 0.55653-0.65872 0.56312-0.43922-0.61086 0.61086
   1  -3   0 1074.20  140.15   1 0.49257-0.39033 0.30228-0.42620-0.81608 0.81608
   1   3   0  397.82  189.51   1 0.29651-0.19427-0.14052 0.26443-0.94463 0.94463
  -1   3   1116302.7 1992.63   1 0.05085-0.15304 0.39078-0.26686-0.91907 0.95150
   1  -3  -1107339.9 1921.95   1 0.14798-0.04578 0.26316-0.38708-0.95333 0.92090
   1   3   1113436.9 1805.21   1 0.19157-0.08938 0.20171-0.07779-0.96052 0.99295
  -1   3  -1117743.7 2097.51   1 0.27160-0.37379 0.08132 0.04260-0.95896 0.92653
   1  -3   1115866.2 1972.95   1 0.35633-0.25415-0.05851-0.06542-0.93252 0.96494
  -1  -3  -1114567.1 1816.97   1 0.47044-0.57263-0.27719 0.15325-0.83776 0.80535
   1   3  -1114237.4 1943.24   1 0.56724-0.46504-0.52515 0.64914-0.63438 0.60195
  -1  -3   1115939.1 1879.92   1 0.60011-0.70235-0.70306 0.57909-0.38151 0.41393
  -1   3   1113766.1 1879.97   1 0.56426-0.66647 0.69195-0.56809-0.45034 0.48278
   1  -3  -1109802.3 1805.96   1 0.54891-0.44673 0.51650-0.64039-0.65719 0.62475
  -1   3  -1114698.2 1834.10   1 0.49193-0.59418 0.30036-0.17644-0.81717 0.78473
   1   3   1114163.0 2043.88   1 0.38437-0.28216 0.03254 0.09131-0.92260 0.95500
   1  -3   1110075.5 1765.61   1 0.32559-0.22335-0.08614-0.03776-0.94157 0.97400
  -1  -3  -1115420.3 1980.07   1 0.30942-0.41166-0.11670-0.00720-0.94373 0.91130
   1   3   238672.53  710.22   1-0.19809 0.30032 0.66222-0.53819-0.72264 0.78749
  -1  -3  -238940.57  705.81   1 0.15887-0.26106 0.24806-0.37198-0.95562 0.89076
  -1   3  -238060.89  822.20   1 0.36148-0.46366-0.06750 0.19143-0.92993 0.86508
   1  -3   237776.39  799.62   1 0.44011-0.33793-0.21445 0.09051-0.87195 0.93680
   1   3  -237527.19  899.43   1 0.59237-0.49013-0.63006 0.75404-0.50210 0.43724
  -1  -3   238774.62  725.13   1 0.59739-0.69963-0.75495 0.63090-0.27049 0.33537
  -1   3   239330.82  984.85   1 0.55697-0.65919 0.75823-0.63438-0.33889 0.40376
   1  -3  -237987.42  733.13   1 0.56322-0.46103 0.62595-0.74985-0.53940 0.47451
   1   3   237554.07  802.18   1 0.45540-0.35320 0.19928-0.07542-0.86769 0.93250
  -1  -3  -237650.23  909.18   1 0.38806-0.49026 0.04050-0.16436-0.92074 0.85593
  -1   3  -238380.41  673.34   1 0.30856-0.41080-0.11830 0.24221-0.94381 0.87896
  -1   3   3 1665.28  355.62   1-0.15344 0.05121 0.61958-0.49556-0.76978 0.86706
  -1  -3  -3 1659.80  125.87   1-0.11936 0.01713 0.58517-0.70920-0.80207 0.70479
   1  -3  -3 2195.94  333.48   1-0.04193 0.14414 0.50132-0.62527-0.86424 0.76697
  -1   3  -3 2083.56  527.28   1 0.43022-0.53241-0.19485 0.31878-0.88143 0.78416
   1  -3   3 1816.55  281.52   1 0.50237-0.40018-0.34862 0.22468-0.79125 0.88846
   1   3  -3 1783.05  297.53   1 0.59896-0.49672-0.68153 0.80550-0.42042 0.32313
  -1  -3   3 1703.44  185.25   1 0.59061-0.69285-0.78280 0.65875-0.19591 0.29324
  -1   3   3 1552.86  253.14   1 0.54687-0.64909 0.79638-0.67248-0.25824 0.35558
   1  -3  -3 1679.98  305.67   1 0.56445-0.46224 0.68516-0.80902-0.46036 0.36306
   1   3   3 1462.72  258.26   1 0.50628-0.40404 0.34522-0.22130-0.79025 0.88756
  -1  -3  -3 1562.53  339.24   1 0.44681-0.54901 0.17729-0.30115-0.87688 0.77967
  -1  -3  -413061.74  313.56   1-0.26207 0.15994 0.71846-0.84234-0.64430 0.51465
  -1   3   413095.16  577.00   1-0.23279 0.13056 0.69331-0.56928-0.68199 0.81170
   1  -3  -414219.91  741.52   1-0.11337 0.21560 0.57897-0.70300-0.80742 0.67771
  -1   3  -415035.03  507.89   1 0.47940-0.58160-0.29661 0.42055-0.82594 0.69632
   1  -3   413392.62  481.16   1 0.54519-0.44299-0.45754 0.33355-0.70243 0.83216
   1   3  -414231.79  977.48   1 0.60023-0.49799-0.70943 0.83340-0.36936 0.23964
  -1  -3   414207.75  501.91   1 0.58330-0.68554-0.79997 0.67592-0.14072 0.27049
  -1   3   414512.55  510.86   1 0.53619-0.63841 0.82078-0.69687-0.19699 0.32678
   1  -3  -413525.06  467.80   1 0.56255-0.46033 0.71924-0.84310-0.40769 0.27795
   1   3   414413.80  510.33   1 0.53821-0.43603 0.46463-0.34074-0.70316 0.83293
  -1  -3  -414736.98  457.70   1 0.48785-0.59009 0.28819-0.41211-0.82397 0.69422
  -1  -3  -5 6026.88  222.08   1-0.33334 0.23121 0.77225-0.89614-0.54082 0.37876
  -1   3   5 6046.54  965.08   1-0.29666 0.19452 0.74578-0.62189-0.59648 0.75855
   1  -3  -5 6975.31  482.69   1-0.16946 0.27168 0.63521-0.75924-0.75351 0.59137
  -1   3  -5 7723.86 1049.59   1 0.51353-0.61572-0.37530 0.49924-0.77163 0.60961
   1  -3   5 6173.81  772.92   1 0.57227-0.47007-0.54260 0.41862-0.61487 0.77703
   1   3  -5 6368.77  773.88   1 0.59999-0.49775-0.72550 0.84948-0.33711 0.17497
  -1  -3   5 6186.61  673.37   1 0.57612-0.67836-0.81160 0.68755-0.09680 0.25901
  -1  -3  -5 6618.79  593.24   1 0.50943-0.61169-0.84477 0.72078 0.16380-0.32603
  -1   3   5 6467.96  854.98   1 0.52599-0.62821 0.83757-0.71366-0.14764 0.30988
   1  -3  -5 6829.96  942.05   1 0.56012-0.45791 0.73986-0.86372-0.37262 0.21044
   1   3   5 6087.61  932.37   1 0.55584-0.45365 0.55826-0.43436-0.61594 0.77815
  -1  -3  -5 6897.10  830.47   1 0.51493-0.61717 0.37426-0.49818-0.77120 0.60902
  -1  -3  -621381.50  532.88   1-0.37203 0.26990 0.79697-0.92086-0.47582 0.28135
  -1   3   619900.05  842.23   1-0.34784 0.24571 0.78193-0.65805-0.51727 0.71175
   1  -3  -619218.75  715.84   1-0.21265 0.31488 0.67550-0.79953-0.70602 0.51146
  -1   3  -621834.70  652.29   1 0.53681-0.63900-0.43491 0.55885-0.72296 0.52853
   1  -3   621547.26 1356.02   1 0.58826-0.48606-0.60825 0.48426-0.53289 0.72748
   1   3  -620390.21  594.90   1 0.59946-0.49722-0.73496 0.85894-0.31696 0.12239
  -1  -3   620798.55  805.77   1 0.56919-0.67143-0.82001 0.69596-0.05993 0.25457
  -1  -3  -622534.81  670.83   1 0.53150-0.63377-0.84189 0.71790 0.09333-0.28800
  -1   3   621329.24  847.93   1 0.51633-0.61855 0.84978-0.72587-0.10613 0.30082
   1  -3  -620823.91  559.77   1 0.55804-0.45583 0.75263-0.87649-0.34946 0.15485
   1   3   621961.20 1001.45   1 0.56352-0.46133 0.63061-0.50672-0.53363 0.72828
  -1  -3  -621915.99  738.34   1 0.53244-0.63468 0.43972-0.56364-0.72328 0.52865
   1  -3  -719708.91  587.64   1-0.24569 0.34791 0.70439-0.82841-0.66593 0.43894
  -1   3  -719777.45  615.81   1 0.55286-0.65506-0.47977 0.60376-0.68129 0.45426
   1  -3   716865.99  701.79   1 0.59665-0.49441-0.65883 0.53485-0.45819 0.68518
   1   3  -717540.77  575.34   1 0.59900-0.49676-0.74039 0.86437-0.30496 0.07797
  -1  -3   718651.40  994.40   1 0.56234-0.66461-0.82644 0.70244-0.02754 0.25466
  -1  -3  -717874.25  484.10   1 0.54606-0.64832-0.83676 0.71277 0.04051-0.26762
   1  -3  -718202.56  543.23   1 0.55652-0.45430 0.76046-0.88432-0.33462 0.10757
   1   3   717565.33  629.13   1 0.56442-0.46220 0.68656-0.56270-0.45832 0.68536
  -1  -3  -719696.06 1581.26   1 0.54359-0.64578 0.48937-0.61326-0.68192 0.45482
   1  -3  -816306.41  610.96   1-0.27079 0.37292 0.72554-0.84943-0.63265 0.37335
  -1   3  -817999.47  608.15   1 0.56372-0.66592-0.51350 0.63749-0.64693 0.38747
   1  -3   817993.09  556.36   1 0.59995-0.49771-0.69818 0.57420-0.39062 0.65004
   1   3  -818719.26 1387.84   1 0.59872-0.49648-0.74317 0.86715-0.29868 0.03926
  -1  -3  -817487.62  497.16   1 0.55654-0.65881-0.83081 0.70682-0.00193-0.25761
  -1  -3   817231.74  568.47   1 0.55576-0.65803-0.83133 0.70734 0.00138 0.25817
   1  -3  -818419.03  544.85   1 0.55554-0.45332 0.76501-0.88887-0.32576 0.06627
   1   3   816406.25 1004.91   1 0.56144-0.45923 0.72979-0.60594-0.39009 0.64957
  -1  -3  -816572.93  882.15   1 0.55072-0.65291 0.52654-0.65043-0.64764 0.38810
   1  -3  -9 3737.12  528.15   1-0.28995 0.39208 0.74065-0.86454-0.60610 0.31438
  -1   3  -9 5072.65  757.70   1 0.57123-0.67343-0.53889 0.66288-0.61909 0.32720
   1  -3   9 3184.24  530.60   1 0.59983-0.49759-0.72905 0.60507-0.32966 0.62151
   1   3  -9 4112.72  604.45   1 0.59862-0.49638-0.74411 0.86809-0.29655 0.00470
  -1  -3  -9 3982.54  348.05   1 0.56457-0.66683-0.82451 0.70052-0.03784-0.25415
  -1  -3   9 3577.67  404.52   1 0.54927-0.65154-0.83517 0.71118 0.02796 0.26403
   1  -3  -9 4796.07  960.02   1 0.55503-0.45281 0.76725-0.89111-0.32132 0.02941
   1   3   9 4094.45  609.73   1 0.55585-0.45363 0.76361-0.63975-0.32850 0.62042
  -1  -3  -9 3938.25  631.78   1 0.55528-0.65747 0.55453-0.67842-0.61979 0.32781
   1  -3 -1042046.83 1271.94   1-0.30448 0.40661 0.75165-0.87554-0.58506 0.26094
  -1   3 -1038459.37 1791.29   1 0.57646-0.67866-0.55799 0.68197-0.59694 0.27262
   1   3 -1036508.23 1653.65   1 0.59866-0.49642-0.74368 0.86766-0.29753-0.02674
   1  -3  1040330.20 1235.26   1 0.59764-0.49540-0.75334 0.62929-0.27439 0.59880
  -1  -3 -1042528.66 1222.89   1 0.57101-0.67325-0.81802 0.69397-0.06918-0.25522
  -1  -3  1039156.96 1194.74   1 0.54282-0.64509-0.83818 0.71419 0.05280 0.27163
   1   3  1037422.14 1172.78   1 0.54906-0.44684 0.79004-0.66614-0.27267 0.59714
  -1  -3 -1038394.29 2219.15   1 0.55821-0.66040 0.57557-0.69946-0.59759 0.27316
  -1   3 -11 8573.79  779.38   1 0.58011-0.68231-0.57226 0.69625-0.57963 0.22289
   1   3 -11 8802.34  912.06   1 0.59882-0.49658-0.74221 0.86619-0.30088-0.05582
  -1  -3 -1110455.96  603.03   1 0.57627-0.67851-0.81139 0.68734-0.09767-0.25917
   1   3  11 8022.06 1124.61   1 0.54081-0.43860 0.81133-0.68742-0.22194 0.57885
  -1   3 -12 4425.93  667.54   1 0.58266-0.68486-0.58279 0.70678-0.56644 0.17725
   1   3 -12 3673.23  419.82   1 0.59904-0.49680-0.73989 0.86387-0.30608-0.08304
  -1  -3 -12 3544.75  446.90   1 0.58069-0.68293-0.80462 0.68057-0.12394-0.26534
   1  -3 -12 3423.34  696.49   1 0.50594-0.40368-0.84481 0.72081 0.17410-0.56343
  -1   3 -12 3586.55  533.22   1 0.51247-0.61469 0.85390-0.72999-0.09061-0.29874
   1   3  12 4031.73  599.30   1 0.53191-0.42969 0.82842-0.70451-0.17545 0.56481
  -1   3 -13 7722.75 1129.70   1 0.58441-0.68661-0.59037 0.71435-0.55670 0.13509
   1   3 -13 6260.61  488.04   1 0.59931-0.49707-0.73688 0.86086-0.31277-0.10879
  -1  -3 -13 6921.17  937.03   1 0.58445-0.68669-0.79771 0.67366-0.14854-0.27318
   1  -3 -13 7187.02 1125.83   1 0.51958-0.41731-0.84406 0.72007 0.13259-0.55438
  -1   3 -13 5933.59  905.09   1 0.51937-0.62159 0.84625-0.72234-0.11876-0.30304
   1   3  13 6569.80  788.83   1 0.52259-0.42037 0.84221-0.71831-0.13254 0.55435
  -1   3 -14  450.82  247.84   1 0.58557-0.68777-0.59557 0.71956-0.54989 0.09585
   1   3 -14  726.93  289.98   1 0.59958-0.49734-0.73326 0.85724-0.32065-0.13333
  -1  -3 -14  350.37  261.57   1 0.58766-0.68990-0.79063 0.66658-0.17187-0.28229
   1  -3 -14  623.12  302.96   1 0.53133-0.42907-0.84193 0.71794 0.09390-0.54813
   1   3  14  225.65  176.31   1 0.51299-0.41078 0.85337-0.72946-0.09267 0.54693
  -1   3 -15 7012.47 1118.57   1 0.58629-0.68849-0.59884 0.72283-0.54557 0.05909
   1   3 -15 6968.69  982.16   1 0.59982-0.49758-0.72912 0.85310-0.32951-0.15690
  -1  -3 -15 6862.50  443.06   1 0.59041-0.69265-0.78338 0.65933-0.19420-0.29241
   1  -3 -15 6982.76  527.11   1 0.54153-0.43927-0.83870 0.71470 0.05760-0.54427
  -1   3 -16 6932.87 1371.98   1 0.58664-0.68884-0.60050 0.72449-0.54335 0.02445
   1   3 -16 5280.13 1039.55   1 0.60003-0.49779-0.72450 0.84848-0.33919-0.17965
  -1  -3 -16 5007.63  442.89   1 0.59277-0.69501-0.77593 0.65188-0.21573-0.30331
   1  -3 -16 6528.43  565.40   1 0.55043-0.44817-0.83455 0.71055 0.02333-0.54244
  -1   3 -17 6319.76 1060.23   1 0.58671-0.68891-0.60080 0.72479-0.54295-0.00838
   1   3 -17 6001.70  874.53   1 0.60017-0.49793-0.71944 0.84342-0.34954-0.20172
  -1  -3 -17 6223.67  871.46   1 0.59476-0.69700-0.76828 0.64423-0.23662-0.31487
   1  -3 -17 5910.24  590.63   1 0.55822-0.45596-0.82963 0.70564-0.00919-0.54236
  -1   3 -18 1298.31  506.09   1 0.58652-0.68872-0.59994 0.72393-0.54410-0.03966
   1   3 -18 1348.28  382.07   1 0.60024-0.49800-0.71397 0.83795-0.36048-0.22322
  -1  -3 -18  804.36  276.24   1 0.59643-0.69867-0.76041 0.63635-0.25698-0.32695
   1  -3 -18 1446.54  616.67   1 0.56507-0.46280-0.82406 0.70007-0.04020-0.54379
  -1   3 -19  863.94  369.59   1 0.58612-0.68832-0.59806 0.72205-0.54660-0.06960
   1   3 -19  506.12  575.17   1 0.60021-0.49797-0.70811 0.83208-0.37190-0.24422
  -1  -3 -19  -45.59  290.76   1 0.59780-0.70004-0.75230 0.62825-0.27690-0.33947
   1  -3 -19  484.54  228.61   1 0.57113-0.46889-0.81788 0.69383-0.06980-0.54656
  -1   3 -20 1226.71  577.47   1 0.58551-0.68771-0.59529 0.71928-0.55026-0.09836
   1   3 -20 1428.99  715.09   1 0.60008-0.49784-0.70187 0.82585-0.38376-0.26480
  -1  -3 -20 3197.28  429.57   1 0.59860-0.70084-0.74423 0.62025-0.29628-0.35227
   1  -3 -20 2438.04  588.66   1 0.57640-0.47416-0.81121 0.68716-0.09838-0.55042
  -1   3 -21 1557.69  544.17   1 0.58471-0.68692-0.59171 0.71570-0.55495-0.12611
   1   3 -21 2859.40  603.72   1 0.59983-0.49759-0.69527 0.81925-0.39597-0.28501
  -1  -3 -21  974.72  450.94   1 0.59941-0.70165-0.73563 0.61165-0.31552-0.36546
   1  -3 -21 1271.10  454.21   1 0.58102-0.47878-0.80407 0.68002-0.12597-0.55527
  -1   3 -22  385.69  281.46   1 0.58373-0.68593-0.58741 0.71139-0.56053-0.15296
   1   3 -22  600.94  416.20   1 0.59944-0.49720-0.68831 0.81229-0.40851-0.30490
  -1  -3 -22  790.06  219.13   1 0.59994-0.70218-0.72676 0.60278-0.33448-0.37892
   1  -3 -22  993.34  400.99   1 0.58504-0.48280-0.79649 0.67244-0.15269-0.56099
  -1   3 -23  734.95  596.78   1 0.58257-0.68477-0.58243 0.70641-0.56690-0.17902
   1   3 -23 1948.29  631.80   1 0.59892-0.49668-0.68100 0.80498-0.42133-0.32451
  -1  -3 -23  982.64  517.81   1 0.60021-0.70245-0.71762 0.59364-0.35322-0.39262
   1  -3 -23  284.97  423.35   1 0.58853-0.48629-0.78848 0.66443-0.17864-0.56748
  -1   3 -24  986.44  397.59   1 0.58123-0.68343-0.57682 0.70081-0.57396-0.20439
   1   3 -24  673.66  504.51   1 0.59825-0.49601-0.67334 0.79732-0.43439-0.34387
  -1  -3 -24  704.46  300.04   1 0.60021-0.70245-0.70818 0.58420-0.37176-0.40651
   1  -3 -24 1270.38  612.66   1 0.59151-0.48927-0.78008 0.65602-0.20391-0.57466
  -1   3 -25 1446.03  530.69   1 0.57970-0.68190-0.57063 0.69461-0.58165-0.22914
   1   3 -25  826.12  377.50   1 0.59742-0.49518-0.66533 0.78931-0.44768-0.36301
  -1  -3 -25 1292.32  388.83   1 0.59996-0.70220-0.69845 0.57447-0.39012-0.42057
   1  -3 -25 1002.73  387.62   1 0.59403-0.49179-0.77128 0.64722-0.22858-0.58243
  -1   4   0109709.3 2010.82   1 0.17644-0.27864 0.22334-0.05811-0.95863 0.95863
   1  -4   0120112.1 2047.74   1 0.28413-0.18194 0.06150-0.22673-0.95681 0.95681
   1   4   0118775.3 1977.36   1 0.39679-0.29461-0.13116 0.29640-0.90848 0.90848
  -1  -4   0117409.7 1927.38   1 0.54233-0.64453-0.44952 0.28421-0.70978 0.70978
  -1   4   0121672.3 2002.55   1 0.53359-0.63583 0.44444-0.27922-0.71954 0.71954
   1  -4   0113698.0 1888.54   1 0.43880-0.33660 0.15735-0.32250-0.88469 0.88469
   1   4   0115108.0 2019.35   1 0.32515-0.22291-0.08698 0.25218-0.94165 0.94165
  -1   4   1112544.3 1989.23   1 0.08201-0.18421 0.35118-0.18595-0.93270 0.96513
   1  -4  -1115858.0 1991.88   1 0.19739-0.09520 0.19330-0.35854-0.96107 0.92864
   1   4   1114662.3 1888.81   1 0.20825-0.10606 0.17741-0.01217-0.96185 0.99428
  -1   4  -1104976.6 2049.22   1 0.26444-0.36663 0.09251 0.07271-0.95995 0.92751
  -1  -4  -1110156.2 1788.81   1 0.44348-0.54567-0.22121 0.05596-0.86855 0.83612
   1   4  -1112555.7 1996.34   1 0.50227-0.40007-0.34838 0.51364-0.79142 0.75901
  -1  -4   1108030.4 1869.74   1 0.58391-0.68611-0.58818 0.42286-0.55953 0.59196
  -1   4   1112792.7 1875.48   1 0.55871-0.66089 0.57952-0.41433-0.59328 0.62573
   1  -4  -1107874.5 1845.11   1 0.50817-0.40593 0.35141-0.51663-0.78630 0.75386
  -1   4  -1110394.6 1805.62   1 0.47177-0.57398 0.24303-0.07788-0.84756 0.81515
   1   4   1113073.2 1963.31   1 0.39404-0.29184 0.05355 0.11160-0.91752 0.94993
  -1  -4  -1110529.6 2062.36   1 0.30663-0.40887-0.12189-0.04331-0.94398 0.91156
   1  -4   1108375.8 1782.25   1 0.31391-0.21167-0.10830-0.05690-0.94325 0.97568
   1   4  -1109285.8 1930.28   1 0.25006-0.14782-0.22229 0.38750-0.94236 0.90993
   1   4   216512.48  508.95   1-0.03017 0.13239 0.48790-0.32264-0.87237 0.93721
  -1   4   215203.04  497.62   1-0.01183-0.09037 0.46663-0.30136-0.88437 0.94921
   1  -4  -215950.12  597.74   1 0.11162-0.00943 0.31239-0.47762-0.94337 0.87851
  -1  -4  -216872.94  405.56   1 0.27133-0.37352 0.08173-0.24696-0.95900 0.89413
  -1   4  -217995.87 1420.55   1 0.34050-0.44269-0.03138 0.19661-0.93972 0.87485
   1  -4   215722.47  706.04   1 0.43427-0.33209-0.20283 0.03758-0.87764 0.94249
   1   4  -216538.99  442.46   1 0.55353-0.45133-0.48177 0.64708-0.67933 0.61447
  -1  -4   217103.73  430.85   1 0.59788-0.70012-0.66964 0.50433-0.44058 0.50543
  -1   4   217298.76  520.75   1 0.56457-0.66679 0.66723-0.50208-0.48585 0.55072
   1  -4  -216611.87  442.93   1 0.54146-0.43927 0.47930-0.64449-0.69071 0.62582
   1   4   218271.85 1382.37   1 0.45163-0.34942 0.18955-0.02440-0.87183 0.93664
  -1  -4  -217192.75  511.27   1 0.37218-0.47442 0.00706-0.17227-0.92813 0.86327
  -1   4  -216695.30  386.42   1 0.36131-0.46354-0.01543 0.18064-0.93231 0.86746
   1   4   370476.17 1236.56   1-0.22729 0.32951 0.68851-0.52314-0.68868 0.78596
  -1   4   367235.91 1330.00   1-0.09910-0.00310 0.56403-0.39877-0.81977 0.91704
   1  -4  -368454.16 1349.30   1 0.03281 0.06939 0.41306-0.57833-0.91010 0.81284
  -1  -4  -368346.33 1306.22   1 0.07716-0.17936 0.35743-0.52266-0.93074 0.83345
  -1   4  -370177.10 1427.18   1 0.40211-0.50430-0.14105 0.30629-0.90465 0.80738
   1  -4   367016.86 1322.34   1 0.48909-0.38689-0.31812 0.15287-0.81214 0.90936
   1   4  -368648.78 1616.32   1 0.57761-0.47541-0.56241 0.72773-0.59164 0.49435
  -1  -4   366877.59 1212.95   1 0.60017-0.70241-0.71961 0.55431-0.34920 0.44648
  -1   4   366898.89 1285.74   1 0.56196-0.66418 0.72515-0.56001-0.39791 0.49522
   1  -4  -368137.31 1253.76   1 0.55636-0.45418 0.56193-0.72713-0.61211 0.51478
   1   4   369475.85 1339.56   1 0.49608-0.39384 0.31295-0.14773-0.80991 0.90722
  -1  -4  -368039.80 1292.83   1 0.42440-0.52661 0.12262-0.28777-0.89712 0.79991
   1   4   412997.64  563.08   1-0.35099 0.45312 0.78397-0.61878-0.51204 0.64169
  -1   4   412643.16  925.96   1-0.17620 0.07398 0.64168-0.47631-0.74644 0.87615
  -1  -4  -411793.46  426.92   1-0.07678-0.02542 0.54005-0.70531-0.83812 0.70843
   1  -4  -412129.13  757.16   1-0.03577 0.13798 0.49431-0.65957-0.86854 0.73886
  -1   4  -413759.30  501.28   1 0.44958-0.55177-0.23358 0.39882-0.86215 0.73245
   1  -4   411883.17  652.68   1 0.52994-0.42775-0.41667 0.25141-0.73860 0.86822
   1   4  -413598.70  478.55   1 0.58913-0.48692-0.61257 0.77788-0.52695 0.39722
  -1  -4   411531.64  952.90   1 0.59781-0.70005-0.75218 0.58678-0.27718 0.40694
  -1   4   412141.80  819.05   1 0.55555-0.65776 0.76498-0.59984-0.32581 0.45555
   1  -4  -411667.00  329.34   1 0.56247-0.46028 0.61601-0.78120-0.55149 0.42172
   1   4   412383.11  488.16   1 0.52728-0.42504 0.41927-0.25406-0.73903 0.86878
  -1  -4  -413669.55 1259.35   1 0.46374-0.56595 0.22125-0.38640-0.85789 0.72827
  -1   4   5 8397.39  913.49   1-0.24213 0.13991 0.70136-0.53599-0.67041 0.83254
  -1  -4  -5 9281.71  409.42   1-0.18007 0.07784 0.64536-0.81073-0.74234 0.58021
   1  -4  -5 7950.42  520.00   1-0.09314 0.19535 0.55769-0.72296-0.82480 0.66269
  -1   4  -5 9384.16 1240.09   1 0.48490-0.58709-0.30874 0.47400-0.81825 0.65623
   1  -4   5 8354.12  628.55   1 0.55895-0.45675-0.49831 0.33300-0.66275 0.82491
   1   4  -5 8406.29  342.05   1 0.59475-0.49251-0.64487 0.81018-0.48000 0.31786
  -1  -4   5 8253.40  361.11   1 0.59307-0.69531-0.77488 0.60948-0.21868 0.38088
  -1   4   5 9090.96  369.69   1 0.54795-0.65016 0.79335-0.62814-0.26521 0.42744
   1  -4  -5 8867.78 1028.54   1 0.56427-0.46205 0.65233-0.81748-0.50601 0.34383
   1   4   5 8225.03 1251.97   1 0.54735-0.44516 0.50819-0.34300-0.66493 0.82714
  -1  -4  -5 9236.75  355.08   1 0.49260-0.59484 0.30237-0.46759-0.81603 0.65384
  -1   4   610347.99  722.59   1-0.29721 0.19508 0.74620-0.58102-0.59568 0.79016
  -1  -4  -611142.23  484.10   1-0.24698 0.14475 0.70548-0.87085-0.66429 0.46973
   1  -4  -611245.39  610.82   1-0.13985 0.24207 0.60605-0.77142-0.78303 0.58847
  -1   4  -610375.27  762.83   1 0.51091-0.61310-0.36894 0.53420-0.77642 0.58200
   1  -4   6 9591.14 1088.81   1 0.57818-0.47598-0.56461 0.39930-0.58899 0.78358
   1   4  -611839.97  963.42   1 0.59751-0.49527-0.66614 0.83145-0.44634 0.25177
  -1  -4   611145.08  415.56   1 0.58735-0.68959-0.79137 0.62597-0.16951 0.36416
  -1   4   611307.65  513.57   1 0.53934-0.64155 0.81450-0.64930-0.21374 0.40842
   1  -4  -610570.62  401.18   1 0.56458-0.46236 0.67698-0.84212-0.47216 0.27755
   1   4   611313.73 1537.35   1 0.55885-0.45667 0.58072-0.41553-0.59197 0.78662
  -1   4   7 1764.94  276.13   1-0.34318 0.24104 0.77887-0.61369-0.52496 0.75185
  -1  -4  -7 1314.72  302.56   1-0.29050 0.18837 0.74107-0.90625-0.60531 0.37842
   1  -4  -7 1209.82  206.31   1-0.17749 0.27972 0.64291-0.80828-0.74508 0.51810
  -1   4  -7 1593.03  337.09   1 0.52987-0.63206-0.41648 0.58173-0.73876 0.51193
   1  -4   7 1661.70  237.93   1 0.59021-0.48801-0.61816 0.45285-0.51914 0.74616
   1   4  -7 1246.49  252.14   1 0.59887-0.49663-0.68036 0.84566-0.42243 0.19543
  -1  -4   7 1425.79  211.08   1 0.58118-0.68342-0.80379 0.63839-0.12700 0.35408
  -1  -4  -7 1454.34  179.63   1 0.49929-0.60156-0.84460 0.67928 0.19323-0.42034
  -1   4   7  831.73  250.65   1 0.53053-0.63275 0.83068-0.66547-0.16880 0.39593
   1  -4  -7 1282.87  209.13   1 0.56418-0.46197 0.69395-0.85909-0.44735 0.22030
   1   4   7 1297.55  309.93   1 0.56375-0.46153 0.63967-0.47453-0.52248 0.74953
  -1  -4  -7 1278.78  203.64   1 0.52726-0.62950 0.41919-0.58441-0.73909 0.51203
  -1  -4  -8 4053.31  513.35   1-0.31959 0.21746 0.76265-0.92783-0.56232 0.30302
   1  -4  -8 4187.12  631.19   1-0.20750 0.30972 0.67084-0.83621-0.71197 0.45256
  -1   4  -8 5632.59  684.14   1 0.54386-0.64606-0.45378 0.61910-0.70589 0.44644
   1  -4   8 3442.08  422.49   1 0.59696-0.49472-0.66134 0.49604-0.45415 0.71357
   1   4  -8 3635.22  353.75   1 0.59954-0.49730-0.68983 0.85513-0.40580 0.14637
  -1  -4   8 4244.57  510.20   1 0.57479-0.67703-0.81340 0.64800-0.08935 0.34888
  -1  -4  -8 4905.99  657.41   1 0.52042-0.62269-0.84396 0.67864 0.12993-0.38948
  -1   4   8 4445.43  718.40   1 0.52172-0.62394 0.84333-0.67812-0.12880 0.38837
   1  -4  -8 3712.08  483.14   1 0.56360-0.46138 0.70561-0.87075-0.42949 0.17001
   1   4   8 3929.15  608.99   1 0.56440-0.46219 0.68725-0.52210-0.45730 0.71678
  -1  -4  -8 4299.81  581.54   1 0.53720-0.63938 0.46017-0.62536-0.70686 0.44732
  -1  -4  -9 7904.84  526.27   1-0.33929 0.23716 0.77628-0.94146-0.53127 0.23956
   1  -4  -9 7550.41  965.43   1-0.23129 0.33351 0.69201-0.85738-0.68382 0.39198
  -1   4  -9 6822.88  895.90   1 0.55393-0.65613-0.48297 0.64829-0.67815 0.38626
   1   4  -9 6328.93  440.69   1 0.59986-0.49762-0.69596 0.86127-0.39470 0.10284
   1  -4   9 6609.24  377.35   1 0.59988-0.49764-0.69638 0.53108-0.39393 0.68578
  -1  -4   9 5784.59  827.92   1 0.56827-0.67051-0.82097 0.65557-0.05535 0.34732
  -1  -4  -9 8673.06 1015.65   1 0.53605-0.63831-0.84062 0.67529 0.07748-0.36948
  -1   4   9 7530.70 1057.41   1 0.51297-0.61519 0.85339-0.68818-0.09260 0.38462
   1   4   9 6125.98  946.45   1 0.56189-0.45967 0.72582-0.56067-0.39680 0.68871
   1  -4  -9 5876.14  842.22   1 0.56304-0.46083 0.71347-0.87862-0.41704 0.12513
  -1  -4  -9 6779.46  740.43   1 0.54416-0.64635 0.49213-0.65732-0.67947 0.38749
  -1  -4 -1011016.38  923.42   1-0.35269 0.25056 0.78506-0.95024-0.50919 0.18506
  -1   4 -1010491.54  643.57   1 0.56131-0.66351-0.50575 0.67107-0.65508 0.33076
   1   4 -1010275.52 1648.71   1 0.60001-0.49777-0.69966 0.86497-0.38787 0.06359
  -1  -4 -1012176.16  927.94   1 0.54808-0.65035-0.83578 0.67046 0.03265-0.35710
   1   4  1010635.34 1543.34   1 0.55717-0.45496 0.75723-0.59208-0.34081 0.66516
  -1  -4 -1011105.76 1335.12   1 0.54903-0.65122 0.51712-0.68232-0.65661 0.33218
  -1  -4 -11 6964.52  481.57   1-0.36170 0.25956 0.79072-0.95590-0.49388 0.13734
  -1   4 -11 6466.26  717.49   1 0.56674-0.66894-0.52345 0.68876-0.63624 0.27949
   1   4 -11 6325.36 1052.59   1 0.60007-0.49783-0.70152 0.86682-0.38441 0.02770
  -1  -4 -11 7089.55 1083.70   1 0.55765-0.65991-0.83004 0.66472-0.00667-0.35021
   1   4  11 6010.43  864.81   1 0.55135-0.44914 0.78266-0.61746-0.28884 0.64576
  -1  -4 -12 5273.41  860.65   1-0.36752 0.26539 0.79428-0.95946-0.48377 0.09482
  -1   4 -12 7346.11 1110.94   1 0.57071-0.67292-0.53708 0.70240-0.62114 0.23195
   1   4 -12 6483.29 1131.29   1 0.60008-0.49784-0.70194 0.86724-0.38362-0.00550
  -1  -4 -12 7352.21  424.33   1 0.56547-0.66771-0.82371 0.65830-0.04173-0.34755
   1   4  12 7484.65 1034.31   1 0.54405-0.44183 0.80377-0.63857-0.24072 0.63008
  -1   4 -13 1096.75  288.64   1 0.57362-0.67582-0.54744 0.71276-0.60931 0.18769
   1   4 -13 1628.91  336.71   1 0.60006-0.49782-0.70120 0.86650-0.38501-0.03654
  -1  -4 -13 1982.78  307.31   1 0.57192-0.67416-0.81697 0.65156-0.07392-0.34780
   1  -4 -13 1774.93  421.46   1 0.49826-0.39599-0.84454 0.67922 0.19615-0.61793
   1   4  13 1508.04  291.03   1 0.53598-0.43376 0.82119-0.65598-0.19587 0.61768
  -1   4 -14 4846.71  506.05   1 0.57570-0.67790-0.55513 0.72045-0.60032 0.14628
   1   4 -14 5558.44  745.06   1 0.60000-0.49776-0.69950 0.86481-0.38817-0.06581
  -1  -4 -14 4859.48  701.25   1 0.57733-0.67957-0.80989 0.64448-0.10372-0.35044
   1  -4 -14 5108.57  565.97   1 0.51264-0.41037-0.84465 0.67933 0.15413-0.60835
   1   4  14 5455.44  810.16   1 0.52736-0.42514 0.83558-0.67038-0.15388 0.60814
  -1   4 -15 8035.08 1083.21   1 0.57714-0.67934-0.56060 0.72592-0.59382 0.10734
   1   4 -15 6059.90  534.11   1 0.59990-0.49766-0.69699 0.86230-0.39281-0.09360
  -1  -4 -15 8804.10 1273.16   1 0.58191-0.68415-0.80252 0.63712-0.13163-0.35497
   1  -4 -15 9531.46  941.91   1 0.52515-0.42288-0.84325 0.67792 0.11464-0.60131
   1   4  15 8152.05  786.23   1 0.51833-0.41612 0.84748-0.68228-0.11440 0.60111
  -1   4 -16 8140.11 1037.72   1 0.57808-0.68028-0.56422 0.72954-0.58946 0.07055
   1   4 -16 5998.57  582.23   1 0.59976-0.49752-0.69378 0.85908-0.39868-0.12016
  -1  -4 -16 7178.64  495.70   1 0.58580-0.68804-0.79489 0.62949-0.15803-0.36101
   1  -4 -1610038.45 1564.30   1 0.53608-0.43381-0.84061 0.67528 0.07736-0.59647
  -1   4 -17 7542.27 1073.46   1 0.57860-0.68080-0.56627 0.73159-0.58697 0.03563
   1   4 -17 4853.90  505.56   1 0.59955-0.49731-0.68995 0.85525-0.40559-0.14568
  -1  -4 -17 5283.86  557.34   1 0.58910-0.69134-0.78701 0.62161-0.18319-0.36829
   1  -4 -17 6251.88  954.31   1 0.54567-0.44341-0.83694 0.67161 0.04200-0.59356
  -1   4 -18 1195.24  457.17   1 0.57878-0.68098-0.56697 0.73229-0.58612 0.00235
   1   4 -18 1311.42  337.08   1 0.59926-0.49702-0.68555 0.85085-0.41339-0.17030
  -1  -4 -18 2002.30  422.13   1 0.59189-0.69413-0.77889 0.61348-0.20735-0.37658
   1  -4 -18 1561.44  401.68   1 0.55411-0.45184-0.83239 0.66707 0.00831-0.59231
  -1   4 -19  598.68  262.74   1 0.57866-0.68086-0.56649 0.73181-0.58670-0.02949
   1   4 -19  825.15  361.20   1 0.59889-0.49665-0.68064 0.84594-0.42195-0.19417
  -1  -4 -19 1312.57  479.61   1 0.59422-0.69646-0.77051 0.60510-0.23066-0.38571
   1  -4 -19 1888.84  694.95   1 0.56154-0.45927-0.82710 0.66177-0.02390-0.59254
  -1   4 -20  977.67  556.03   1 0.57827-0.68047-0.56498 0.73029-0.58854-0.06008
   1   4 -20  944.22  366.61   1 0.59843-0.49619-0.67525 0.84055-0.43117-0.21738
  -1  -4 -20 2430.52  435.89   1 0.59615-0.69839-0.76187 0.59647-0.25326-0.39555
   1  -4 -20 1949.98  551.70   1 0.56814-0.46590-0.82111 0.65570-0.05469-0.59412
  -1   4 -21  963.27  302.80   1 0.57764-0.67985-0.56254 0.72785-0.59149-0.08957
   1   4 -21  726.41  305.61   1 0.59786-0.49562-0.66940 0.83471-0.44096-0.24002
  -1  -4 -21  404.61  207.04   1 0.59769-0.69993-0.75298 0.58758-0.27526-0.40599
   1  -4 -21 1131.18  386.28   1 0.57390-0.47166-0.81455 0.64915-0.08448-0.59677
  -1   4 -22  495.08  252.90   1 0.57679-0.67899-0.55926 0.72458-0.59542-0.11807
   1   4 -22  926.79  272.28   1 0.59717-0.49493-0.66313 0.82844-0.45125-0.26215
  -1  -4 -22  407.82  245.89   1 0.59862-0.70086-0.74411 0.57880-0.29655-0.41685
   1  -4 -22  848.11  409.10   1 0.57895-0.47671-0.80745 0.64205-0.11326-0.60042
  -1   4 -23 1104.53  497.70   1 0.57572-0.67792-0.55522 0.72054-0.60021-0.14571
   1   4 -23  275.17  303.69   1 0.59635-0.49411-0.65644 0.82175-0.46199-0.28385
  -1  -4 -23  976.72  346.11   1 0.59948-0.70172-0.73468 0.56937-0.31759-0.42824
   1  -4 -23  296.59  383.89   1 0.58336-0.48112-0.79984 0.63444-0.14116-0.60497
  -1   4 -24 1788.75  539.05   1 0.57444-0.67664-0.55047 0.71579-0.60579-0.17257
   1   4 -24  582.98  265.37   1 0.59540-0.49316-0.64935 0.81465-0.47311-0.30516
  -1  -4 -24 2057.00  799.12   1 0.60001-0.70225-0.72495 0.55965-0.33824-0.44002
   1  -4 -24 1349.43  452.81   1 0.58718-0.48494-0.79176 0.62636-0.16825-0.61031
  -1   4 -25  674.56  417.15   1 0.57296-0.67516-0.54507 0.71038-0.61205-0.19874
   1   4 -25  663.28  494.34   1 0.59429-0.49205-0.64186 0.80716-0.48457-0.32612
  -1  -4 -25  751.97  301.14   1 0.60024-0.70248-0.71493 0.54963-0.35857-0.45213
   1  -4 -25  792.77  417.98   1 0.59047-0.48823-0.78323 0.61783-0.19464-0.61637
  -1   5   031129.79  767.64   1 0.18035-0.28255 0.21779-0.01124-0.95918 0.95918
   1  -5   032583.34  768.19   1 0.30758-0.20539 0.02363-0.23017-0.95122 0.95122
   1   5   032729.51  692.70   1 0.34763-0.24545-0.04343 0.24998-0.93662 0.93662
  -1  -5   031155.82  629.31   1 0.51726-0.61945-0.38446 0.17789-0.76461 0.76461
  -1   5   032142.93  857.48   1 0.51800-0.62024 0.38500-0.17848-0.76383 0.76383
   1  -5   032150.04  828.41   1 0.40162-0.29941 0.07031-0.27675-0.91310 0.91310
   1   5   033870.41  875.13   1 0.34744-0.24520-0.04344 0.24995-0.93669 0.93669
  -1   5   116476.34  523.20   1 0.09982-0.20202 0.32798-0.12144-0.93939 0.97182
   1   5   116974.72  683.38   1 0.20651-0.10432 0.17994 0.02659-0.96175 0.99418
   1  -5  -116090.64  483.93   1 0.23568-0.13349 0.13660-0.34314-0.96218 0.92974
  -1   5  -114839.62  662.99   1 0.25538-0.35757 0.10655 0.09999-0.96095 0.92851
   1  -5   116364.35  497.26   1 0.37454-0.27235-0.09066-0.11588-0.92276 0.95519
  -1  -5  -116621.43  427.92   1 0.43826-0.54044-0.21074 0.00418-0.87379 0.84136
   1   5  -115641.84  417.77   1 0.44552-0.34334-0.22533 0.43188-0.86644 0.83402
  -1  -5   116048.54  552.07   1 0.56311-0.66531-0.51150 0.30485-0.64905 0.68148
  -1   5   116165.62  436.96   1 0.54702-0.64921 0.50650-0.30001-0.66648 0.69893
   1  -5  -114966.90  406.41   1 0.46872-0.36651 0.23466-0.44110-0.85160 0.81920
  -1   5  -116805.51  485.80   1 0.46612-0.56833 0.22763-0.02119-0.85493 0.82252
   1   5   115415.77 1040.43   1 0.40347-0.30127 0.07445 0.13198-0.91195 0.94436
   1  -5   115124.80  375.69   1 0.30243-0.20019-0.12966-0.07684-0.94430 0.97673
   1   5  -117149.61  581.24   1 0.28630-0.18406-0.15900 0.36551-0.94485 0.91242
  -1   5   278897.91 1603.61   1 0.01815-0.12036 0.43092-0.22434-0.90220 0.96704
   1   5   283738.92 1486.74   1 0.03824 0.06396 0.40637-0.19979-0.91290 0.97774
   1  -5  -284501.13 1722.60   1 0.16302-0.06083 0.24226-0.44880-0.95641 0.89155
  -1   5  -283177.64 1576.10   1 0.32160-0.42379 0.00047 0.20606-0.94687 0.88200
  -1  -5  -283839.00 1425.40   1 0.32249-0.42468-0.00101-0.20553-0.94656 0.88170
   1  -5   288855.88 1656.86   1 0.43305-0.33086-0.20041-0.00613-0.87880 0.94365
   1   5  -283912.02 1502.76   1 0.50630-0.40410-0.35790 0.56447-0.78457 0.71976
  -1  -5   280046.34 1530.57   1 0.58647-0.68867-0.59971 0.39306-0.54441 0.60927
  -1   5   280171.34 1578.68   1 0.56066-0.66285 0.59661-0.39012-0.57419 0.63908
   1  -5  -281450.83 1483.61   1 0.51056-0.40832 0.35937-0.56590-0.78113 0.71625
   1   5   285246.21 1607.17   1 0.45141-0.34920 0.18898 0.01745-0.87207 0.93688
  -1   5  -285388.03 1539.17   1 0.38889-0.49109 0.04230 0.16413-0.92031 0.85550
  -1  -5  -287365.71 1623.02   1 0.35775-0.45999-0.02268-0.18382-0.93353 0.86868
   1   5   363301.46 1254.36   1-0.12229 0.22452 0.58820-0.38148-0.79941 0.89669
  -1   5   363031.38 1295.36   1-0.06046-0.04174 0.52210-0.31552-0.85073 0.94799
   1  -5  -365188.51 1272.33   1 0.09353 0.00865 0.33623-0.54277-0.93712 0.83983
  -1  -5  -363352.57 1102.68   1 0.18708-0.28927 0.20817-0.41472-0.96003 0.86274
   1   5  -362626.35 1511.03   1 0.54273-0.44053-0.45063 0.65728-0.70878 0.61148
  -1  -5   361948.12 1174.70   1 0.59691-0.69915-0.66097 0.45433-0.45476 0.55204
  -1   5   362796.83 1175.52   1 0.56452-0.66674 0.66284-0.45641-0.49188 0.58919
   1  -5  -364744.25 1276.80   1 0.53497-0.43273 0.45021-0.65673-0.71491 0.61760
   1   5   365133.10 1290.15   1 0.49022-0.38798 0.29522-0.08869-0.82007 0.91738
  -1  -5  -365645.31 1290.54   1 0.40473-0.50694 0.07728-0.28372-0.91116 0.81394
  -1   5  -365616.66 1213.62   1 0.29177-0.39400-0.14914 0.35565-0.94478 0.84750
   1   5   4197384.9 4836.64   1-0.24942 0.35164 0.70754-0.50082-0.66118 0.79089
  -1   5   4195417.5 5067.75   1-0.13291 0.03068 0.59904-0.39233-0.78960 0.91931
  -1  -5  -4193690.6 3272.67   1 0.05845-0.16065 0.38124-0.58778-0.92262 0.79290
  -1   5  -4205391.5 5033.52   1 0.42241-0.52459-0.17962 0.38618-0.88842 0.75872
   1  -5   4183447.6 3237.02   1 0.51932-0.41713-0.38958 0.18301-0.76060 0.89022
   1   5  -4199605.5 4851.64   1 0.56415-0.46195-0.51489 0.72154-0.64545 0.51572
  -1  -5   4192951.7 3326.15   1 0.60014-0.70238-0.70430 0.49767-0.37917 0.50889
  -1   5   4189893.0 3382.24   1 0.56317-0.66538 0.71187-0.50544-0.41961 0.54935
   1  -5  -4190908.0 3407.04   1 0.54877-0.44659 0.51574-0.72223-0.65791 0.52814
   1   5   4195838.2 4896.05   1 0.51938-0.41714 0.38992-0.18340-0.76039 0.89014
  -1  -5  -4192388.0 3351.53   1 0.44208-0.54428 0.16544-0.37188-0.88158 0.75196
   1   5   5 5237.40  332.27   1-0.33974 0.44187 0.77658-0.57010-0.53055 0.69262
  -1   5   5 5245.68  688.67   1-0.19758 0.09535 0.66175-0.45503-0.72321 0.88535
  -1  -5  -5 4730.16  206.65   1-0.04648-0.05572 0.50646-0.71304-0.86100 0.69889
   1  -5  -5 3683.07  809.03   1-0.02536 0.12757 0.48236-0.68894-0.87560 0.71349
  -1   5  -5 5121.37  611.34   1 0.45779-0.55998-0.25050 0.45707-0.85303 0.69101
   1  -5   5 4486.92  338.68   1 0.54818-0.44597-0.46606 0.25941-0.69446 0.85662
   1   5  -5 5124.42  640.18   1 0.57694-0.47474-0.55982 0.76647-0.59475 0.43259
  -1  -5   5 4113.33  298.25   1 0.59938-0.70162-0.73590 0.52927-0.31491 0.47705
  -1   5   5 4711.71  704.86   1 0.55871-0.66092 0.74887-0.54244-0.35640 0.51858
   1  -5  -5 4306.73  793.59   1 0.55653-0.45434 0.56308-0.76957-0.61090 0.44869
   1   5   5 5035.89  741.11   1 0.53994-0.43775 0.47232-0.26583-0.69668 0.85889
  -1  -5  -5 5080.43  323.14   1 0.47117-0.57341 0.24085-0.44737-0.84851 0.68633
  -1   5   6 3742.99  736.34   1-0.25399 0.15176 0.71137-0.50465-0.65531 0.84987
  -1  -5  -6 3866.33  506.26   1-0.12551 0.02329 0.59151-0.79822-0.79646 0.60190
   1  -5  -6 3770.58  852.22   1-0.07292 0.17513 0.53584-0.74242-0.84116 0.64663
  -1   5  -6 4747.55  584.54   1 0.48526-0.58745-0.30955 0.51611-0.81774 0.62331
   1  -5   6 3179.79  287.29   1 0.56885-0.46664-0.53060 0.32395-0.62838 0.82297
   1   5  -6 3795.82  606.16   1 0.58470-0.48249-0.59163 0.79828-0.55505 0.36046
  -1  -5   6 3225.34  367.63   1 0.59661-0.69885-0.75946 0.55271-0.25935 0.45399
  -1   5   6 4147.89  904.04   1 0.55290-0.65511 0.77720-0.57069-0.30042 0.49510
   1  -5  -6 4593.20  755.44   1 0.56076-0.45857 0.59753-0.80402-0.57315 0.37849
   1   5   6 3969.28  722.94   1 0.55339-0.45120 0.54233-0.33584-0.63215 0.82681
  -1  -5  -6 4322.46  340.88   1 0.49309-0.59533 0.30384-0.51036-0.81519 0.62056
  -1   5   715894.71  978.28   1-0.30231 0.20018 0.75003-0.54355-0.58826 0.81515
  -1  -5  -713925.91  649.99   1-0.18349 0.08127 0.64860-0.85531-0.73867 0.51169
   1  -5  -713921.37  576.41   1-0.11270 0.21492 0.57827-0.78498-0.80802 0.58103
  -1   5  -714274.19  579.22   1 0.50631-0.60850-0.35793 0.56450-0.78455 0.55772
   1  -5   711730.71 1356.28   1 0.58309-0.48089-0.58463 0.37798-0.56409 0.79111
   1   5  -714192.47  799.04   1 0.58948-0.48728-0.61438 0.82103-0.52443 0.29741
  -1  -5   714030.46  477.97   1 0.59225-0.69449-0.77770 0.57095-0.21074 0.43782
  -1   5   713805.65  864.47   1 0.54571-0.64793 0.79952-0.59301-0.25090 0.47802
   1  -5  -713561.02  575.10   1 0.56299-0.46080 0.62275-0.82924-0.54333 0.31623
   1   5   712056.96 1601.44   1 0.56114-0.45895 0.60129-0.39480-0.56882 0.79591
  -1  -5  -713142.91 1510.01   1 0.50949-0.61173 0.35578-0.56230-0.78347 0.55641
  -1   5   8 6200.68 1148.03   1-0.34379 0.24165 0.77927-0.57279-0.52396 0.78326
  -1  -5  -8 5092.48  274.00   1-0.22557 0.12334 0.68700-0.89371-0.69075 0.43134
   1  -5  -8 4427.71 1006.61   1-0.14577 0.24799 0.61198-0.81870-0.77731 0.51790
  -1   5  -8 6183.58 1086.69   1 0.52237-0.62457-0.39725 0.60381-0.75452 0.49528
   1  -5   8 5256.24  926.14   1 0.59229-0.49005-0.62961 0.42298-0.50276 0.76218
   1   5  -8 5804.84 1049.85   1 0.59249-0.49025-0.63078 0.83741-0.50105 0.24163
  -1  -5   8 6056.19  366.04   1 0.58708-0.68932-0.79202 0.58527-0.16743 0.42696
  -1   5   8 6669.21  724.97   1 0.53797-0.64018 0.81732-0.61081-0.20632 0.46590
   1  -5  -8 4606.35  846.10   1 0.56384-0.46162 0.64146-0.84789-0.52019 0.26071
   1   5   8 5087.69  759.85   1 0.56422-0.46200 0.65081-0.44437-0.50803 0.76751
  -1  -5  -8 6854.89 1037.10   1 0.52166-0.62391 0.39820-0.60472-0.75451 0.49501
  -1   5   931754.67 2362.30   1-0.37919 0.27706 0.80114-0.59466-0.46300 0.75472
  -1  -5  -931940.54  913.34   1-0.25618 0.15396 0.71320-0.91991-0.65246 0.36062
   1  -5  -933150.57 1379.29   1-0.17292 0.27515 0.63854-0.84526-0.74990 0.45806
  -1   5  -932638.21 1080.98   1 0.53462-0.63681-0.42902 0.63559-0.72809 0.43644
   1   5  -930158.37 1001.87   1 0.59439-0.49215-0.64248 0.84911-0.48363 0.19178
  -1  -5   932531.33 1674.49   1 0.58138-0.68362-0.80345 0.59669-0.12827 0.42024
  -1  -5  -935425.37 1062.68   1 0.50222-0.60448-0.84473 0.63808 0.18490-0.47690
  -1   5   929131.87 1304.43   1 0.52990-0.63211 0.83170-0.62519-0.16575 0.45777
   1   5   930439.75 1084.98   1 0.56425-0.46204 0.69208-0.48565-0.45014 0.74206
  -1  -5 -10 9831.31  645.05   1-0.27840 0.17627 0.73162-0.93810-0.62226 0.29813
  -1   5 -1012220.29 1154.62   1 0.54413-0.64633-0.45455 0.66119-0.70519 0.38087
   1   5 -10 9875.12 1261.50   1 0.59559-0.49335-0.65074 0.85737-0.47095 0.14667
  -1  -5 -1012559.86 1510.37   1 0.52062-0.62289-0.84393 0.63728 0.12928-0.45372
  -1   5  1011303.11  966.51   1 0.52164-0.62385 0.84344-0.63693-0.12842 0.45289
   1   5  1011352.41 1697.07   1 0.56181-0.45959 0.72659-0.52016-0.39551 0.71986
  -1  -5 -11 6739.58  497.55   1-0.29471 0.19258 0.74430-0.95077-0.59929 0.24275
  -1   5 -11 6820.66 1327.58   1 0.55125-0.65345-0.47500 0.68164-0.68592 0.32917
   1   5 -11 6725.70  797.32   1 0.59634-0.49410-0.65635 0.86298-0.46213 0.10542
  -1  -5 -11 7099.39  738.40   1 0.53516-0.63742-0.84089 0.63423 0.08063-0.43752
  -1   5  11 7228.40 1065.64   1 0.51327-0.61548 0.85309-0.64658-0.09375 0.45067
   1   5  11 6918.98  816.74   1 0.55751-0.45529 0.75549-0.54906-0.34408 0.70087
  -1  -5 -1229721.84  904.93   1-0.30654 0.20440 0.75317-0.95965-0.58202 0.19307
  -1   5 -1228725.83 1007.12   1 0.55667-0.65887-0.49126 0.69790-0.66990 0.28072
   1   5 -1227421.36 1309.21   1 0.59678-0.49454-0.65990 0.86653-0.45647 0.06733
  -1  -5 -1227435.38 1494.87   1 0.54688-0.64915-0.83637 0.62972 0.03734-0.42667
   1   5  1226589.07 1820.04   1 0.55226-0.45004 0.77951-0.57301-0.29555 0.68492
  -1   5 -13 4570.54  567.35   1 0.56078-0.66298-0.50406 0.71071-0.65683 0.23522
   1   5 -13 4845.48  665.07   1 0.59701-0.49477-0.66180 0.86843-0.45341 0.03184
  -1  -5 -13 5483.97 1160.49   1 0.55650-0.65877-0.83084 0.62418-0.00177-0.42000
   1   5  13 3845.49  869.54   1 0.54557-0.44335 0.79991-0.59340-0.24998 0.67179
  -1   5 -14 1553.06  405.38   1 0.56388-0.66608-0.51400 0.72064-0.64640 0.19236
   1   5 -14  958.60  524.25   1 0.59708-0.49484-0.66235 0.86898-0.45253-0.00146
  -1  -5 -14 1395.83  367.81   1 0.56451-0.66678-0.82456 0.61791-0.03758-0.41663
   1  -5 -14  834.31  354.53   1 0.49345-0.39118-0.84415 0.63750 0.20952-0.66374
   1   5  14 1098.64  314.19   1 0.53808-0.43587 0.81708-0.61057-0.20696 0.66122
  -1   5 -15 1573.53  972.70   1 0.56616-0.66836-0.52152 0.72816-0.63833 0.15186
   1   5 -15  648.20  335.72   1 0.59701-0.49477-0.66176 0.86839-0.45347-0.03294
  -1  -5 -15  494.93  169.01   1 0.57127-0.67351-0.81771 0.61096-0.07056-0.41604
   1  -5 -15  650.03  291.37   1 0.50817-0.40590-0.84480 0.63814 0.16755-0.65422
   1   5  15  261.00  202.03   1 0.53000-0.42778 0.83154-0.62503-0.16623 0.65294
  -1   5 -16  187.11  362.58   1 0.56779-0.66999-0.52699 0.73364-0.63236 0.11345
   1   5 -16  350.97  270.48   1 0.59682-0.49458-0.66021 0.86685-0.45596-0.06288
  -1  -5 -16  224.45  273.83   1 0.57696-0.67920-0.81042 0.60366-0.10160-0.41744
   1  -5 -16 -320.90  355.96   1 0.52108-0.41881-0.84387 0.63722 0.12782-0.64694
   1   5  16  508.34  241.23   1 0.52144-0.41922 0.84369-0.63718-0.12756 0.64671
  -1   5 -17 1230.96  401.94   1 0.56888-0.67108-0.53073 0.73737-0.62824 0.07690
   1   5 -17  902.33  265.94   1 0.59653-0.49429-0.65783 0.86446-0.45978-0.09149
  -1  -5 -17  979.83  371.39   1 0.58179-0.68403-0.80273 0.59597-0.13089-0.42059
   1  -5 -17  -23.92  370.24   1 0.53244-0.43018-0.84165 0.63500 0.09009-0.64165
   1   5  17  530.01  358.30   1 0.51250-0.41028 0.85387-0.64736-0.09072 0.64232
  -1   5 -18 4105.26  500.24   1 0.56953-0.67173-0.53295 0.73960-0.62577 0.04200
   1   5 -18 4048.10  747.01   1 0.59613-0.49389-0.65471 0.86134-0.46473-0.11897
  -1  -5 -18 3840.79  475.58   1 0.58589-0.68813-0.79468 0.58793-0.15872-0.42520
   1  -5 -18 5290.74  622.63   1 0.54247-0.44020-0.83832 0.63167 0.05412-0.63812
  -1   5 -19 5254.44  580.99   1 0.56979-0.67199-0.53386 0.74050-0.62476 0.00855
   1   5 -19 4329.99 1162.60   1 0.59562-0.49338-0.65093 0.85756-0.47066-0.14547
  -1  -5 -19 4946.72  858.53   1 0.58936-0.69160-0.78631 0.57956-0.18534-0.43103
   1  -5 -19 6128.97  633.73   1 0.55133-0.44906-0.83405 0.62739 0.01971-0.63616
  -1   5 -20 3670.71  506.45   1 0.56971-0.67192-0.53360 0.74024-0.62505-0.02358
   1   5 -20 3942.01  779.48   1 0.59499-0.49275-0.64654 0.85317-0.47744-0.17111
  -1  -5 -20 6324.46  546.83   1 0.59227-0.69451-0.77763 0.57088-0.21093-0.43788
   1  -5 -20 7748.34  700.68   1 0.55916-0.45690-0.82894 0.62229-0.01329-0.63560
  -1   5 -21  564.16  404.88   1 0.56934-0.67154-0.53230 0.73895-0.62649-0.05456
   1   5 -21 1087.68  395.58   1 0.59425-0.49201-0.64160 0.84823-0.48497-0.19601
  -1  -5 -21  474.03  167.27   1 0.59468-0.69692-0.76865 0.56189-0.23564-0.44561
   1  -5 -21  971.38  541.66   1 0.56613-0.46389-0.82308 0.61633-0.04491-0.63634
  -1   5 -22 1318.59  575.18   1 0.56869-0.67089-0.53007 0.73671-0.62897-0.08452
   1   5 -22  888.34  394.61   1 0.59339-0.49115-0.63613 0.84276-0.49316-0.22025
  -1  -5 -22  968.02  438.47   1 0.59663-0.69887-0.75936 0.55261-0.25960-0.45409
   1  -5 -22 1151.98  486.13   1 0.57223-0.46999-0.81659 0.60984-0.07558-0.63811
  -1   5 -23  572.44  408.90   1 0.56778-0.66999-0.52698 0.73363-0.63237-0.11355
   1   5 -23  587.66  338.83   1 0.59239-0.49015-0.63018 0.83681-0.50193-0.24391
  -1  -5 -23  -13.37  297.37   1 0.59816-0.70040-0.74977 0.54301-0.28292-0.46321
   1  -5 -23  282.66  400.57   1 0.57759-0.47535-0.80950 0.60275-0.10526-0.64087
  -1   5 -24 1170.58  461.87   1 0.56664-0.66884-0.52311 0.72976-0.63660-0.14175
   1   5 -24  990.26  481.38   1 0.59126-0.48902-0.62375 0.83038-0.51121-0.26705
  -1  -5 -24 1275.56  466.17   1 0.59902-0.70126-0.74018 0.53354-0.30545-0.47281
   1  -5 -24 1909.08  490.52   1 0.58228-0.48004-0.80185 0.59510-0.13405-0.64452
  -1   5 -25  633.14  411.95   1 0.56525-0.66745-0.51851 0.72516-0.64157-0.16921
   1   5 -25 1337.36  513.23   1 0.58996-0.48775-0.61683 0.82348-0.52101-0.28977
  -1  -5 -25  446.55  320.94   1 0.59978-0.70202-0.72997 0.52334-0.32771-0.48298
   1  -5 -25 1745.27  585.62   1 0.58635-0.48411-0.79367 0.58692-0.16205-0.64896
  -1   6   020436.67  633.38   1 0.17950-0.28169 0.21900 0.02884-0.95906 0.95906
   1   6   018647.74  522.81   1 0.31202-0.20983 0.01634 0.23150-0.94993 0.94993
   1  -6   021724.72  614.73   1 0.32777-0.22558-0.00984-0.23800-0.94470 0.94470
  -1  -6   020398.60  906.86   1 0.50417-0.60636-0.35285 0.10497-0.78822 0.78822
  -1   6   019489.69  899.04   1 0.50928-0.61152 0.35510-0.10727-0.78391 0.78391
   1   6   022286.02  756.62   1 0.36591-0.26367-0.00596 0.25377-0.93062 0.93062
   1  -6   020513.16  723.83   1 0.37307-0.27083 0.00891-0.25673-0.92775 0.92775
  -1   6   117924.22  599.08   1 0.10928-0.21147 0.31550-0.06765-0.94260 0.97503
   1   6   119981.24  501.63   1 0.19913-0.09694 0.19077 0.05707-0.96122 0.99365
  -1   6  -118686.30 1114.01   1 0.24510-0.34729 0.12231 0.12553-0.96175 0.92931
   1  -6   121125.25  862.05   1 0.38446-0.28227-0.10854-0.13931-0.91673 0.94916
   1   6  -119364.54  613.07   1 0.39950-0.29731-0.13618 0.38404-0.90656 0.87413
  -1  -6  -118519.12  480.81   1 0.44014-0.54233-0.21450-0.03335-0.87192 0.83950
  -1  -6   119916.60  486.90   1 0.54741-0.64962-0.46387 0.21590-0.69652 0.72895
  -1   6   120150.99  546.08   1 0.53742-0.63961 0.46116-0.21337-0.70604 0.73848
  -1   6  -119186.16  524.61   1 0.46608-0.56828 0.22751 0.02021-0.85498 0.82258
   1  -6  -119684.35  588.70   1 0.43525-0.33305 0.14865-0.39638-0.88794 0.85554
   1   6   120126.01  665.76   1 0.41267-0.31046 0.09530 0.15242-0.90587 0.93828
   1   6  -121255.10  698.08   1 0.31500-0.21276-0.10625 0.35406-0.94312 0.91069
   1  -6   119418.84  631.26   1 0.29088-0.18865-0.15074-0.09707-0.94480 0.97723
  -1  -6  -119168.02  606.38   1 0.29414-0.39637-0.14484-0.10296-0.94472 0.91229
  -1   6   210570.87  800.31   1 0.03730-0.13951 0.40754-0.15964-0.91242 0.97726
   1   6   210451.00  390.07   1 0.06919 0.03299 0.36763-0.11978-0.92739 0.99225
   1  -6  -211442.21 1263.40   1 0.20470-0.10251 0.18260-0.43045-0.96164 0.89677
  -1   6  -210524.88 1277.43   1 0.30394-0.40613 0.02957 0.21827-0.95222 0.88736
  -1  -6  -210321.12  479.00   1 0.35458-0.45676-0.05545-0.19241-0.93337 0.86852
   1  -6   2 9762.22 1116.70   1 0.43474-0.33256-0.20376-0.04410-0.87719 0.94204
   1   6  -210203.84  423.85   1 0.46171-0.35952-0.25870 0.50658-0.84846 0.78365
  -1  -6   210452.16  575.36   1 0.57405-0.67625-0.54902 0.30104-0.60748 0.67234
  -1   6   210008.40  385.11   1 0.55404-0.65623 0.54641-0.29862-0.62806 0.69295
   1  -6  -211454.20  997.80   1 0.47926-0.37702 0.26338-0.51121-0.83721 0.77234
   1   6   212891.33 1123.89   1 0.45335-0.35115 0.19398 0.05374-0.86996 0.93477
  -1   6  -210922.50  413.18   1 0.40756-0.50977 0.08367 0.16404-0.90933 0.84452
  -1  -6  -2 9698.45  991.02   1 0.34410-0.44634-0.05006-0.19774-0.93759 0.87273
   1   6  -212499.65 1591.14   1 0.26211-0.15987-0.20164 0.44945-0.94373 0.87888
   1   6   324738.96  766.14   1-0.06118 0.16339 0.52290-0.27501-0.85019 0.94745
  -1   6   323390.40 1092.50   1-0.03348-0.06872 0.49169-0.24379-0.87012 0.96738
   1  -6  -323131.36  624.55   1 0.14373-0.04154 0.26900-0.51685-0.95235 0.85506
  -1   6  -325679.60 1145.85   1 0.35483-0.45702-0.05589 0.30376-0.93325 0.83597
   1  -6   325125.52 1051.29   1 0.47740-0.37521-0.29223 0.04435-0.82866 0.92587
   1   6  -325769.93 1003.20   1 0.50419-0.40199-0.35290 0.60078-0.78819 0.69098
  -1  -6   325423.06 1331.35   1 0.58928-0.69148-0.61334 0.36536-0.52588 0.62318
  -1   6   323754.64  627.59   1 0.56228-0.66446 0.61368-0.36589-0.55428 0.65161
   1  -6  -324121.90  660.23   1 0.50894-0.40670 0.35395-0.60178-0.78465 0.68734
   1   6   321268.50  705.15   1 0.48740-0.38516 0.28686-0.03903-0.82471 0.92202
  -1   6  -325021.62  606.36   1 0.33592-0.43816-0.06616 0.31397-0.93956 0.84227
   1   6   430949.82  754.01   1-0.17642 0.27865 0.64189-0.39384-0.74621 0.87592
  -1   6   431134.44  801.84   1-0.10061-0.00159 0.56564-0.31774-0.81848 0.94817
   1  -6  -431328.08  999.18   1 0.08628 0.01590 0.34566-0.59351-0.93438 0.80466
  -1  -6  -430744.93  651.42   1 0.15182-0.25402 0.25785-0.50570-0.95418 0.82446
  -1   6  -429962.87  816.55   1 0.39744-0.49963-0.13237 0.38023-0.90802 0.77832
   1  -6   430545.72  781.95   1 0.51231-0.41012-0.37234 0.12446-0.77387 0.90349
   1   6  -430078.03  746.47   1 0.53264-0.43045-0.42377 0.67165-0.73259 0.60298
  -1  -6   429925.49  697.77   1 0.59705-0.69929-0.66210 0.41414-0.45292 0.58264
  -1   6   430778.72 1215.25   1 0.56457-0.66678 0.66671-0.41899-0.48656 0.61630
   1  -6  -431447.46  791.06   1 0.52852-0.42628 0.42408-0.67191-0.73539 0.60564
   1   6   429214.05 1321.76   1 0.51415-0.41191 0.37157-0.12374-0.77302 0.90278
  -1  -6  -432856.82  871.82   1 0.42215-0.52435 0.11730-0.36503-0.89890 0.76928
  -1   6  -432901.97  848.22   1 0.25826-0.36049-0.20828 0.45609-0.94335 0.81364
   1   6   5 6028.00  726.21   1-0.26908 0.37121 0.72416-0.47639-0.63495 0.79702
  -1   6   5 4974.61  742.36   1-0.16241 0.06018 0.62838-0.38032-0.76075 0.92289
   1  -6  -5 5006.56  703.84   1 0.03403 0.06817 0.41157-0.65946-0.91074 0.74863
  -1  -6  -5 5328.06  286.74   1 0.05826-0.16046 0.38148-0.62933-0.92253 0.76039
  -1   6  -5 5311.23  614.95   1 0.43234-0.53452-0.19901 0.44687-0.87947 0.71734
   1  -6   5 7680.07  768.45   1 0.53984-0.43765-0.44317 0.19529-0.71565 0.87767
   1   6  -5 6074.07  693.78   1 0.55185-0.44965-0.47679 0.72476-0.68419 0.52203
  -1  -6   5 5129.52  345.26   1 0.60000-0.70224-0.69941 0.45145-0.38835 0.55049
  -1   6   5 5379.10  916.90   1 0.56340-0.66562 0.70861-0.46089-0.42478 0.58696
   1   6   5 5416.00  647.24   1 0.53424-0.43200 0.44715-0.19932-0.71737 0.87956
  -1  -6  -5 5507.67  425.32   1 0.45065-0.55285 0.18704-0.43477-0.87288 0.71086
   1   6   617538.72 1033.71   1-0.34049 0.44262 0.77708-0.52931-0.52933 0.72381
  -1   6   617205.71  883.92   1-0.21805 0.11582 0.68033-0.43228-0.69971 0.89426
   1  -6  -613192.44 1657.54   1-0.01237 0.11458 0.46726-0.71516-0.88403 0.68950
  -1  -6  -618073.16  848.60   1-0.02049-0.08171 0.47672-0.72462-0.87881 0.68428
  -1   6  -615933.68 1263.53   1 0.46031-0.56250-0.25576 0.50364-0.85011 0.65568
   1   6  -616843.89  845.06   1 0.56463-0.46243-0.51648 0.76445-0.64376 0.44916
   1  -6   614670.94  923.22   1 0.56105-0.45885-0.50490 0.25693-0.65596 0.85055
  -1  -6   616750.74  936.24   1 0.59986-0.70210-0.72844 0.48048-0.33096 0.52553
  -1   6   616293.75  855.48   1 0.55980-0.66202 0.74206-0.49434-0.36872 0.56333
   1   6   616111.54 1568.70   1 0.54838-0.44619 0.51364-0.26585-0.65987 0.85453
   1  -6  -618714.31  640.24   1 0.54943-0.44725 0.51934-0.76712-0.65452 0.45986
  -1  -6  -617518.17  720.42   1 0.47347-0.57571 0.24717-0.49500-0.84541 0.65079
  -1   6   719577.42  938.48   1-0.26711 0.16498 0.72257-0.47480-0.63760 0.86449
  -1  -6  -718479.29  767.89   1-0.08389-0.01831 0.54776-0.79565-0.83241 0.60546
   1  -6  -718907.66  965.74   1-0.05271 0.15492 0.51347-0.76136-0.85648 0.62953
  -1   6  -719030.68  773.73   1 0.48269-0.58488-0.30385 0.55173-0.82139 0.59455
   1   6  -720203.82  801.90   1 0.57331-0.47111-0.54632 0.79430-0.61060 0.38358
   1  -6   719153.93  788.35   1 0.57644-0.47424-0.55794 0.30996-0.59699 0.82402
  -1  -6   717857.16  709.64   1 0.59795-0.70019-0.75123 0.50312-0.27945 0.50654
  -1   6   717347.54 1039.70   1 0.55461-0.65682 0.76906-0.52134-0.31772 0.54477
   1   6   717404.52  813.27   1 0.55763-0.45544 0.57113-0.32334-0.60237 0.82946
   1  -6  -719821.58  703.36   1 0.55476-0.45257 0.55105-0.79884-0.62335 0.39625
  -1   6   8 5494.54  730.64   1-0.31030 0.20817 0.75594-0.50817-0.57641 0.83571
  -1  -6  -8 5636.75  328.27   1-0.13337 0.03115 0.59952-0.84757-0.78916 0.52975
   1  -6  -8 6013.26  891.94   1-0.08725 0.18946 0.55139-0.79928-0.82967 0.57030
  -1   6  -8 5922.48  711.49   1 0.50040-0.60260-0.34403 0.59191-0.79450 0.53526
   1   6  -8 6005.02 1159.69   1 0.57925-0.47705-0.56883 0.81681-0.58385 0.32440
  -1  -6   8 5757.25  868.00   1 0.59444-0.69668-0.76961 0.52151-0.23306 0.49259
  -1   6   8 6090.78 1042.89   1 0.54878-0.65099 0.79090-0.54309-0.27075 0.53032
   1   6   8 6009.54  920.94   1 0.56283-0.46064 0.62061-0.37282-0.54594 0.80548
   1  -6  -8 5663.61 1149.75   1 0.55819-0.45600 0.57541-0.82320-0.59775 0.33821
  -1   6   913003.90  805.59   1-0.34796 0.24583 0.78201-0.53424-0.51708 0.80879
  -1  -6  -911890.25  745.72   1-0.17192 0.06969 0.63758-0.88563-0.75095 0.45911
  -1   6  -913973.58 1382.00   1 0.51438-0.61657-0.37737 0.62525-0.77006 0.47842
   1   6  -913147.41 1914.95   1 0.58336-0.48116-0.58580 0.83378-0.56259 0.27070
  -1   6   912063.16  765.48   1 0.54185-0.64407 0.80900-0.56119-0.22781 0.51983
   1   6   912469.89 1549.39   1 0.56452-0.46231 0.66315-0.41543-0.49146 0.78337
  -1  -6 -10 1075.32  155.47   1-0.20164 0.09942 0.66549-0.91355-0.71864 0.39438
  -1   6 -10  539.59  336.38   1 0.52538-0.62757-0.40488 0.65276-0.74835 0.42430
   1   6 -10 1714.68  251.23   1 0.58622-0.48402-0.59854 0.84651-0.54597 0.22165
  -1   6  10 1265.40  245.57   1 0.53444-0.63666 0.82402-0.57621-0.18801 0.51248
   1   6  10 1153.80  216.53   1 0.56394-0.46173 0.69944-0.45172-0.43902 0.76338
  -1  -6 -1112330.14  797.12   1-0.22451 0.12229 0.68607-0.93412-0.69202 0.33533
  -1   6 -1116742.66 2087.61   1 0.53403-0.63623-0.42746 0.67534-0.72943 0.37298
   1   6 -1114641.94 1876.00   1 0.58820-0.48600-0.60796 0.85594-0.53328 0.17653
  -1  -6 -1116514.50  663.93   1 0.51019-0.61246-0.84475 0.59677 0.16152-0.51841
  -1   6  1114716.81 2104.69   1 0.52670-0.62891 0.83655-0.58874-0.15086 0.50778
   1   6  1116168.18 1336.07   1 0.56136-0.45915 0.73046-0.48274-0.38895 0.74574
  -1  -6 -12 2619.24  475.68   1-0.24204 0.13982 0.70128-0.94934-0.67052 0.28140
  -1   6 -12 3076.35  580.67   1 0.54082-0.64302-0.44587 0.69376-0.71322 0.32437
   1   6 -12 2718.65  454.40   1 0.58956-0.48736-0.61476 0.86274-0.52390 0.13472
  -1  -6 -12 3438.95  593.83   1 0.52603-0.62829-0.84309 0.59510 0.11175-0.50108
  -1   6  12 2541.41  505.61   1 0.51871-0.62092 0.84704-0.59923-0.11597 0.50533
   1   6  12 1797.67  475.91   1 0.55722-0.45500 0.75699-0.50927-0.34125 0.73048
  -1   6 -13 3172.26  505.41   1 0.54630-0.64850-0.46069 0.70867-0.69950 0.27789
   1   6 -13 2796.29  521.33   1 0.59045-0.48825-0.61945 0.86743-0.51732 0.09571
  -1  -6 -13 3759.74  644.45   1 0.53903-0.64130-0.83963 0.59164 0.06677-0.48855
  -1   6  13 3812.28  656.27   1 0.51053-0.61275 0.85584-0.60803-0.08299 0.50480
   1   6  13 3953.79  722.92   1 0.55227-0.45006 0.77946-0.53165-0.29567 0.71748
  -1   6 -14 1955.84  489.39   1 0.55043-0.65263-0.47259 0.72057-0.68824 0.23419
   1   6 -14 1122.85  322.57   1 0.59102-0.48878-0.62244 0.87040-0.51308 0.05909
  -1  -6 -14 1514.21  458.74   1 0.54984-0.65211-0.83486 0.58688 0.02568-0.47990
   1   6  14 2037.77  512.15   1 0.54596-0.44374 0.79887-0.55106-0.25243 0.70669
  -1   6 -15  527.09  345.97   1 0.55359-0.65579-0.48195 0.72993-0.67915 0.19267
   1   6 -15 1114.75  358.42   1 0.59129-0.48905-0.62395 0.87190-0.51093 0.02451
  -1  -6 -15 1068.90  395.25   1 0.55892-0.66119-0.82912 0.58114-0.01222-0.47444
   1  -6 -15 1159.63  363.38   1 0.49109-0.38883-0.84391 0.59592 0.21595-0.70262
   1   6  15  769.42  322.95   1 0.53887-0.43665 0.81547-0.56766-0.21120 0.69791
  -1   6 -16 1084.45  338.86   1 0.55598-0.65818-0.48914 0.73712-0.67202 0.15311
   1   6 -16 1049.29  311.83   1 0.59134-0.48910-0.62422 0.87218-0.51053-0.00831
  -1  -6 -16 1427.80  458.85   1 0.56662-0.66886-0.82261 0.57451-0.04729-0.47175
   1  -6 -16 1158.98  373.67   1 0.50585-0.40359-0.84481 0.59682 0.17436-0.69347
   1   6  16 1243.53  288.01   1 0.53116-0.42895 0.82965-0.58184-0.17182 0.69097
  -1   6 -17 2056.69  483.95   1 0.55771-0.65991-0.49445 0.74243-0.66668 0.11534
   1   6 -17  692.32  200.08   1 0.59120-0.48896-0.62344 0.87140-0.51165-0.03962
   1  -6 -17  697.42  303.23   1 0.51890-0.41664-0.84414 0.59616 0.13473-0.68629
   1   6  17  472.54  231.83   1 0.52295-0.42073 0.84173-0.59392-0.13413 0.68573
  -1   6 -18 2217.62  414.79   1 0.55889-0.66109-0.49813 0.74610-0.66294 0.07917
   1   6 -18 1965.47  550.62   1 0.59089-0.48865-0.62174 0.86969-0.51408-0.06961
  -1  -6 -18 2381.78  424.35   1 0.57869-0.68093-0.80786 0.55975-0.11170-0.47223
   1  -6 -18 2113.69  503.85   1 0.53046-0.42820-0.84215 0.59416 0.09688-0.68088
   1   6  18 2031.86  609.82   1 0.51432-0.41210 0.85198-0.60417-0.09797 0.68201
  -1   6 -19 2494.98  593.58   1 0.55961-0.66181-0.50037 0.74834-0.66065 0.04444
   1   6 -19 3160.03  654.83   1 0.59040-0.48820-0.61917 0.86715-0.51772-0.09847
  -1  -6 -19 1530.86  386.24   1 0.58340-0.68564-0.79976 0.55166-0.14144-0.47492
   1  -6 -19 2107.86  485.45   1 0.54071-0.43845-0.83901 0.59103 0.06063-0.67708
  -1   6 -20 2278.25  569.94   1 0.55992-0.66212-0.50133 0.74931-0.65965 0.01102
   1   6 -20 -131.34  337.08   1 0.58978-0.48758-0.61591 0.86388-0.52230-0.12632
  -1  -6 -20  454.65  317.14   1 0.58740-0.68964-0.79126 0.54315-0.16988-0.47892
   1  -6 -20  613.65  323.85   1 0.54981-0.44754-0.83488 0.58690 0.02582-0.67471
  -1   6 -21 3589.05  726.39   1 0.55986-0.66206-0.50116 0.74914-0.65983-0.02123
   1   6 -21 2478.78  562.78   1 0.58901-0.48681-0.61197 0.85995-0.52777-0.15328
  -1  -6 -21 3210.31  513.90   1 0.59076-0.69300-0.78237 0.53426-0.19720-0.48404
   1  -6 -21 3486.73  604.95   1 0.55788-0.45561-0.82988 0.58189-0.00768-0.67365
  -1   6 -22  170.73  361.33   1 0.55948-0.66168-0.49996 0.74794-0.66106-0.05243
   1   6 -22  731.35  315.00   1 0.58809-0.48589-0.60741 0.85539-0.53403-0.17946
  -1  -6 -22 1303.73  546.85   1 0.59355-0.69579-0.77311 0.52501-0.22356-0.49013
   1  -6 -22  909.84  340.69   1 0.56503-0.46276-0.82409 0.57611-0.04003-0.67375
  -1   6 -23 1693.78  507.72   1 0.55880-0.66100-0.49783 0.74581-0.66324-0.08268
   1   6 -23  370.71  253.40   1 0.58702-0.48482-0.60228 0.85025-0.54097-0.20495
  -1  -6 -23  608.95  280.34   1 0.59582-0.69806-0.76351 0.51540-0.24908-0.49705
   1  -6 -23  653.71  267.69   1 0.57139-0.46915-0.81758 0.56948-0.07116-0.67497
  -1   6 -24 1441.66  582.11   1 0.55783-0.66004-0.49484 0.74282-0.66628-0.11207
   1   6 -24  625.09  264.28   1 0.58580-0.48360-0.59660 0.84457-0.54854-0.22981
  -1  -6 -24  414.38  327.62   1 0.59761-0.69985-0.75355 0.50545-0.27387-0.50470
   1  -6 -24  -20.05  368.43   1 0.57695-0.47471-0.81044 0.56234-0.10151-0.67706
  -1   6 -25  750.66  312.54   1 0.55660-0.65880-0.49106 0.73903-0.67010-0.14068
   1   6 -25 1532.21  421.95   1 0.58442-0.48222-0.59040 0.83837-0.55666-0.25413
  -1  -6 -25  796.94  272.72   1 0.59868-0.70092-0.74357 0.49561-0.29779-0.51290
   1  -6 -25  821.78  204.11   1 0.58181-0.47957-0.80270 0.55459-0.13099-0.68002
  -1   7   0 2262.09  343.31   1 0.17551-0.27771 0.22466 0.06448-0.95849 0.95849
   1   7   0 1609.86  302.30   1 0.28355-0.18136 0.06242 0.22673-0.95692 0.95692
   1  -7   0 1831.55  260.35   1 0.34588-0.24370-0.04041-0.24875-0.93740 0.93740
  -1  -7   0 1921.89  429.53   1 0.49809-0.60028-0.33866 0.04946-0.79825 0.79825
  -1   7   0 2156.74  372.43   1 0.50505-0.60730 0.34123-0.05210-0.79276 0.79276
   1   7   0 3210.32  469.48   1 0.38200-0.27980 0.02749 0.26152-0.92374 0.92374
   1  -7   0 1614.55  257.53   1 0.34967-0.24744-0.03897-0.25013-0.93605 0.93605
  -1   7   111364.06 1369.40   1 0.11318-0.21538 0.31031-0.02115-0.94387 0.97630
   1   7   110433.15  692.56   1 0.18906-0.08687 0.20533 0.08382-0.96025 0.99268
  -1   7  -111492.17 1417.44   1 0.23395-0.33614 0.13920 0.14995-0.96222 0.92979
   1  -7  -110746.87  509.47   1 0.29356-0.19137 0.04639-0.33555-0.95481 0.92237
   1   7  -111999.01  839.58   1 0.36151-0.25932-0.06756 0.35673-0.92991 0.89749
   1  -7   111650.79  858.75   1 0.39458-0.29239-0.12707-0.16210-0.91003 0.94245
  -1  -7  -111220.45  383.47   1 0.44514-0.54733-0.22455-0.06461-0.86684 0.83441
  -1  -7   110686.41  650.35   1 0.53691-0.63910-0.43518 0.14598-0.72273 0.75513
  -1   7   110261.29  395.71   1 0.53100-0.63324 0.43388-0.14475-0.72785 0.76029
  -1   7  -111000.34  400.39   1 0.46872-0.57092 0.23466 0.05435-0.85160 0.81920
   1   7   113604.33 1800.00   1 0.42164-0.31944 0.11612 0.17289-0.89929 0.93169
   1  -7  -110639.52  955.20   1 0.40656-0.30435 0.08140-0.37042-0.90998 0.87758
   1   7  -112169.40  588.64   1 0.33874-0.23650-0.06064 0.34976-0.93892 0.90649
  -1  -7  -110482.43 1232.56   1 0.28597-0.38820-0.15960-0.12951-0.94485 0.91242
   1  -7   110329.62  356.42   1 0.27920-0.17696-0.17168-0.11742-0.94475 0.97718
  -1   7   2 4404.51  736.21   1 0.04895-0.15115 0.39316-0.10400-0.91816 0.98302
   1   7   2 4588.02  642.62   1 0.08304 0.01915 0.34986-0.06070-0.93311 0.99797
   1  -7  -2 4459.43  819.53   1 0.23965-0.13746 0.13060-0.41975-0.96203 0.89716
  -1   7  -2 4715.19  841.79   1 0.28705-0.38924 0.05684 0.23231-0.95622 0.89135
  -1  -7  -2 4447.40  343.58   1 0.37810-0.48029-0.09705-0.19212-0.92066 0.85580
   1   7  -2 4641.51  684.18   1 0.42183-0.31964-0.17850 0.46767-0.88892 0.82407
   1  -7   2 3994.86  405.06   1 0.43836-0.33617-0.21094-0.07822-0.87369 0.93854
  -1  -7   2 4310.11  500.96   1 0.56390-0.66610-0.51409 0.22478-0.64631 0.71117
  -1   7   2 4062.76  576.31   1 0.54809-0.65027 0.51206-0.22298-0.66134 0.72623
   1  -7  -2 4198.97  289.71   1 0.44991-0.34771 0.18516-0.47418-0.87366 0.80885
   1   7   2 4322.16  421.61   1 0.45668-0.35447 0.20260 0.08641-0.86625 0.93106
  -1   7  -2 5402.20  484.73   1 0.42228-0.52449 0.11763 0.17138-0.89879 0.83398
  -1  -7  -2 4288.70  674.85   1 0.33090-0.43313-0.07592-0.21319-0.94060 0.87575
   1   7  -2 4455.53  765.00   1 0.29359-0.19135-0.14584 0.43495-0.94474 0.87988
  -1   7   3 1396.30  253.67   1-0.01507-0.08713 0.47042-0.18120-0.88231 0.97957
   1   7   3 1125.49  206.74   1-0.02545 0.12766 0.48247-0.19325-0.87554 0.97280
   1  -7  -3 1135.89  394.96   1 0.18601-0.08382 0.20970-0.49886-0.95990 0.86261
  -1  -7  -3 1350.61  249.64   1 0.30021-0.40240 0.03565-0.32480-0.95320 0.85590
  -1   7  -3 2335.12  428.60   1 0.33387-0.43606-0.02012 0.30927-0.94240 0.84510
   1   7  -3  718.67  238.38   1 0.46665-0.36446-0.26911 0.55831-0.84250 0.74528
   1  -7   3  607.60  301.54   1 0.47626-0.37407-0.28976 0.00056-0.83018 0.92739
  -1  -7   3 1324.81  187.92   1 0.58134-0.68354-0.57727 0.28796-0.57340 0.67070
  -1   7   3  913.64  157.95   1 0.55839-0.66058 0.57703-0.28794-0.59600 0.69333
   1  -7  -3  796.29  151.91   1 0.48221-0.37997 0.27179-0.56093-0.83282 0.73551
   1   7   3 1384.39  410.10   1 0.48671-0.38447 0.28485 0.00427-0.82581 0.92312
  -1  -7  -3 1206.41  179.30   1 0.37010-0.47233 0.00271-0.29182-0.92898 0.83170
  -1   7  -3 1435.34  212.99   1 0.36668-0.46892-0.00437 0.29348-0.93033 0.83305
   1   7  -3 1840.69  425.02   1 0.24804-0.14581-0.22571 0.51482-0.94208 0.84480
   1   7   419818.13  623.33   1-0.12700 0.22923 0.59303-0.30363-0.79509 0.92480
  -1   7   418038.43  965.55   1-0.07699-0.02521 0.54028-0.25106-0.83795 0.96764
   1  -7  -417706.34 1554.82   1 0.13429-0.03210 0.28190-0.57106-0.94999 0.82027
  -1  -7  -418265.36  567.59   1 0.21808-0.32027 0.16291-0.45207-0.96223 0.83249
  -1   7  -420079.22 1406.67   1 0.37418-0.47637-0.09002 0.37919-0.92297 0.79326
   1  -7   417248.12  834.42   1 0.50816-0.40596-0.36233 0.07313-0.78133 0.91095
   1   7  -417548.27  717.40   1 0.49936-0.39717-0.34161 0.63081-0.79619 0.66657
  -1  -7   418591.83 1105.10   1 0.59196-0.69420-0.62769 0.33840-0.50555 0.63526
  -1   7   416308.33  614.00   1 0.56352-0.66570 0.63052-0.34143-0.53374 0.66351
   1   7   420709.60 2111.40   1 0.51107-0.40883 0.36107-0.07194-0.78001 0.90976
   1  -7  -417517.15  927.38   1 0.50541-0.40317 0.34239-0.63152-0.79203 0.66228
  -1  -7  -417959.82 1517.50   1 0.40354-0.50575 0.07462-0.36364-0.91190 0.78229
  -1   7  -419314.86  652.56   1 0.30563-0.40787-0.12374 0.41285-0.94407 0.81436
   1   7   5 5034.67  279.63   1-0.21543 0.31765 0.67799-0.38859-0.70278 0.86491
  -1   7   5 4495.06  784.18   1-0.13530 0.03308 0.60147-0.31207-0.78734 0.94948
   1  -7  -5 4560.24  607.66   1 0.08591 0.01627 0.34614-0.63530-0.93423 0.77209
  -1  -7  -5 4924.85  275.80   1 0.13841-0.24060 0.27629-0.56544-0.95105 0.78890
  -1   7  -5 3796.82  616.02   1 0.40813-0.51031-0.15235 0.44152-0.90012 0.73799
   1   7  -5 4847.31  854.09   1 0.52299-0.42079-0.39879 0.68799-0.75328 0.59126
   1  -7   5 4000.60  712.85   1 0.53416-0.43196-0.42779 0.13859-0.72915 0.89117
  -1  -7   5 4213.45  689.71   1 0.59770-0.69994-0.66792 0.37864-0.44342 0.60556
  -1   7   5 4845.69  812.22   1 0.56459-0.66681 0.67461-0.38560-0.47552 0.63770
   1   7   5 4600.13  720.21   1 0.53014-0.42790 0.43045-0.14131-0.73052 0.89270
   1  -7  -5 5010.29  672.16   1 0.52195-0.41971 0.39925-0.68838-0.75376 0.59157
  -1  -7  -5 4664.90  644.72   1 0.43134-0.53355 0.13918-0.42819-0.89138 0.72936
   1   7   625025.72  765.04   1-0.28817 0.39030 0.73927-0.45020-0.60862 0.80310
  -1   7   620615.74 1131.09   1-0.18909 0.08687 0.65387-0.36447-0.73259 0.92715
   1  -7  -622799.45 1440.78   1 0.04183 0.06037 0.40194-0.69115-0.91470 0.72018
  -1  -7  -622778.25  691.77   1 0.06600-0.16820 0.37168-0.66084-0.92600 0.73143
  -1   7  -623300.34 1505.50   1 0.43632-0.53850-0.20688 0.49605-0.87568 0.68112
   1   7  -623121.94 1013.13   1 0.54002-0.43783-0.44366 0.73285-0.71521 0.52078
  -1  -7   621149.51 1474.95   1 0.60003-0.70227-0.70030 0.41101-0.38670 0.58127
  -1   7   623717.40 1007.86   1 0.56324-0.66545 0.71090-0.42190-0.42114 0.61576
   1   7   619758.66  825.51   1 0.54430-0.44212 0.49283-0.20374-0.67885 0.87350
   1  -7  -623043.09 1010.78   1 0.53366-0.43142 0.44475-0.73388-0.71930 0.52467
   1   7   718978.05  880.23   1-0.34696 0.44909 0.78136-0.49229-0.51873 0.74562
  -1   7   719173.45 1088.47   1-0.23788 0.13566 0.69772-0.40832-0.67571 0.90269
   1  -7  -717502.08  834.71   1 0.00232 0.09988 0.44991-0.73912-0.89306 0.66611
  -1  -7  -718301.98  776.07   1 0.00358-0.10579 0.44841-0.73762-0.89381 0.66686
  -1   7  -718503.20 2411.17   1 0.45934-0.56154-0.25374 0.54294-0.85124 0.62440
   1   7  -718075.18 1787.09   1 0.55253-0.45033-0.47878 0.76809-0.68225 0.45523
  -1  -7   718680.68  897.40   1 0.59995-0.70219-0.72657 0.43729-0.33487 0.56187
  -1   7   717694.91  922.36   1 0.55996-0.66218 0.74099-0.45198-0.37063 0.59768
   1   7   719582.02 2207.48   1 0.55429-0.45210 0.54800-0.25891-0.62646 0.85356
   1  -7  -720040.12  882.01   1 0.54185-0.43966 0.48110-0.77019-0.68915 0.46205
  -1   7   8  831.37  237.66   1-0.28136 0.17923 0.73396-0.44490-0.61815 0.87746
  -1  -7  -8 1402.81  239.94   1-0.04870-0.05350 0.50897-0.79818-0.85940 0.60003
  -1   7  -8 2009.26  371.02   1 0.47821-0.58040-0.29400 0.58320-0.82756 0.56833
   1   7  -8  863.04  394.72   1 0.56148-0.45928-0.50629 0.79559-0.65452 0.39506
  -1   7   8 1085.32  333.33   1 0.55530-0.65752 0.76607-0.47707-0.32367 0.58315
   1   7   8 1104.75  326.04   1 0.56065-0.45846 0.59652-0.30744-0.57429 0.83383
  -1   7   9 3751.20  881.48   1-0.32023 0.21810 0.76311-0.47404-0.56134 0.85306
  -1  -7  -9 4136.95  498.44   1-0.09154-0.01066 0.55598-0.84520-0.82613 0.53433
  -1   7  -9 4078.29  490.50   1 0.49352-0.59571-0.32815 0.61735-0.80544 0.51380
   1   7  -9 4530.60  394.46   1 0.56803-0.46583-0.52781 0.81712-0.63146 0.33957
  -1   7   9 3729.31  648.19   1 0.55005-0.65227 0.78694-0.49783-0.27955 0.57157
   1   7   9 4838.61  534.48   1 0.56372-0.46151 0.63911-0.35010-0.52321 0.81512
  -1   7  10 7557.27 1012.41   1-0.35463 0.25249 0.78629-0.49722-0.50593 0.83006
  -1  -7 -10 5560.15  698.94   1-0.12600 0.02377 0.59200-0.88140-0.79602 0.47175
  -1   7 -10 7711.91  535.49   1 0.50589-0.60809-0.35694 0.64613-0.78527 0.46123
   1   7 -10 9111.61 1115.73   1 0.57283-0.47063-0.54460 0.83390-0.61259 0.28827
  -1   7  10 8543.55 1122.00   1 0.54369-0.64590 0.80466-0.51555-0.23856 0.56303
   1   7  10 8133.41 1038.55   1 0.56458-0.46237 0.67615-0.38714-0.47335 0.79770
  -1  -7 -11 1292.28  332.74   1-0.15387 0.05165 0.62002-0.90942-0.76934 0.41265
  -1   7 -11 2104.50  365.77   1 0.51588-0.61807-0.38105 0.67024-0.76724 0.41079
   1   7 -11 1928.16  388.96   1 0.57635-0.47415-0.55760 0.84691-0.59739 0.24064
  -1   7  11 1730.00  378.98   1 0.53678-0.63899 0.81966-0.53055-0.20003 0.55695
   1   7  11 1596.13  358.77   1 0.56342-0.46120 0.70838-0.41938-0.42513 0.78192
  -1   7 -12 4504.04  613.06   1 0.52391-0.62610-0.40113 0.69032-0.75140 0.36254
   1   7 -12 3820.95  759.04   1 0.57893-0.47673-0.56756 0.85686-0.58541 0.19623
  -1  -7 -12 4216.70  684.61   1 0.50399-0.60626-0.84478 0.55547 0.17978-0.56911
  -1   7  12 4907.55  882.76   1 0.52945-0.63167 0.83240-0.54329-0.16365 0.55301
   1   7  12 4343.07  612.17   1 0.56061-0.45839 0.73641-0.44740-0.37869 0.76791
  -1   7 -13 6831.65 1173.24   1 0.53034-0.63254-0.41772 0.70692-0.73772 0.31645
   1   7 -13 4569.41  570.12   1 0.58079-0.47859-0.57501 0.86431-0.57623 0.15461
  -1  -7 -13 6486.07  822.54   1 0.52032-0.62259-0.84397 0.55466 0.13023-0.55202
  -1   7  13 5811.83 1518.66   1 0.52180-0.62402 0.84323-0.55411-0.12913 0.55094
   1   7  13 6691.29  835.63   1 0.55646-0.45424 0.76075-0.47175-0.33405 0.75571
  -1   7 -14 3318.16  768.09   1 0.53548-0.63767-0.43132 0.72052-0.72609 0.27243
   1   7 -14 3217.35  652.21   1 0.58209-0.47989-0.58039 0.86969-0.56948 0.11543
  -1  -7 -14 3639.92  582.02   1 0.53396-0.63622-0.84124 0.55192 0.08483-0.53906
  -1   7  14 3293.06  774.61   1 0.51389-0.61611 0.85243-0.56332-0.09626 0.55052
   1   7  14 3379.16  733.39   1 0.55165-0.44943 0.78166-0.49255-0.29099 0.74525
  -1   7 -15 4868.72  803.78   1 0.53953-0.64173-0.44232 0.73152-0.71641 0.23034
   1   7 -15 4294.77  869.58   1 0.58295-0.48075-0.58404 0.87334-0.56485 0.07837
  -1  -7 -15 4868.81  837.48   1 0.54543-0.64770-0.83705 0.54773 0.04291-0.52958
   1   7  15 3765.52  841.67   1 0.54554-0.44332 0.79998-0.51086-0.24982 0.73652
  -1   7 -16 3774.07 1027.21   1 0.54284-0.64504-0.45094 0.74025-0.70849 0.18958
   1   7 -16 4814.78 1294.35   1 0.58346-0.48126-0.58620 0.87551-0.56207 0.04316
  -1  -7 -16 5932.29 1096.18   1 0.55516-0.65743-0.83173 0.54241 0.00392-0.52303
   1  -7 -16 4145.21  581.15   1 0.49080-0.38853-0.84387 0.55456 0.21675-0.73586
   1   7  16 4865.02  978.87   1 0.53870-0.43648 0.81583-0.52672-0.21026 0.72941
  -1   7 -17 1497.75  600.25   1 0.54525-0.64745-0.45770 0.74700-0.70228 0.15094
   1   7 -17 2202.92  523.19   1 0.58366-0.48146-0.58710 0.87641-0.56092 0.00958
  -1  -7 -17  701.39  281.82   1 0.56344-0.66571-0.82551 0.53619-0.03259-0.51896
   1  -7 -17 2264.77  560.84   1 0.50540-0.40313-0.84480 0.55549 0.17570-0.72726
   1   7  17  867.75  355.23   1 0.53124-0.42902 0.82953-0.54042-0.17219 0.72379
  -1   7 -18 4688.65  585.03   1 0.54701-0.64921-0.46273 0.75203-0.69760 0.11383
   1   7 -18 4711.42 1132.88   1 0.58361-0.48141-0.58689 0.87620-0.56119-0.02257
  -1  -7 -18 6682.77 1107.40   1 0.57054-0.67278-0.81854 0.52908-0.06680-0.51712
   1  -7 -18 7918.00 1288.72   1 0.51838-0.41612-0.84420 0.55488 0.13637-0.72037
   1   7  18 4772.32  919.33   1 0.52327-0.42105 0.84131-0.55220-0.13552 0.71956
  -1   7 -19 1255.54  577.71   1 0.54823-0.65043-0.46622 0.75553-0.69431 0.07810
   1   7 -19  534.14  299.22   1 0.58334-0.48114-0.58570 0.87500-0.56272-0.05347
  -1  -7 -19 1152.75  308.13   1 0.57658-0.67882-0.81096 0.52150-0.09943-0.51693
   1  -7 -19 1347.91  311.93   1 0.52995-0.42769-0.84227 0.55295 0.09861-0.71506
   1   7  19  434.18  169.14   1 0.51486-0.41264 0.85140-0.56229-0.10013 0.71662
  -1   7 -20 1474.08  429.56   1 0.54897-0.65117-0.46836 0.75766-0.69228 0.04365
   1   7 -20  902.37  323.39   1 0.58286-0.48066-0.58363 0.87294-0.56536-0.08327
  -1  -7 -20 1692.92  446.07   1 0.58174-0.68398-0.80283 0.51337-0.13053-0.51827
   1  -7 -20 1411.20  346.28   1 0.54026-0.43799-0.83918 0.54987 0.06230-0.71119
  -1   7 -21 1095.85  410.54   1 0.54929-0.65149-0.46927 0.75858-0.69141 0.01034
   1   7 -21  643.58  236.52   1 0.58218-0.47998-0.58078 0.87008-0.56899-0.11207
  -1  -7 -21 1423.34  472.33   1 0.58611-0.68835-0.79421 0.50475-0.16030-0.52094
   1  -7 -21  769.76  335.76   1 0.54944-0.44717-0.83508 0.54577 0.02729-0.70863
  -1   7 -22  497.51  546.52   1 0.54922-0.65142-0.46908 0.75839-0.69159-0.02190
   1   7 -22  387.27  357.29   1 0.58132-0.47912-0.57720 0.86650-0.57349-0.14000
  -1  -7 -22  350.79  273.87   1 0.58979-0.69203-0.78514 0.49568-0.18892-0.52476
   1  -7 -22 1542.54  693.87   1 0.55761-0.45534-0.83007 0.54076-0.00650-0.70727
  -1   7 -23 1282.46  549.64   1 0.54881-0.65101-0.46789 0.75719-0.69273-0.05319
   1   7 -23  729.27  408.14   1 0.58028-0.47808-0.57295 0.86226-0.57878-0.16714
  -1  -7 -23  526.62  324.29   1 0.59285-0.69509-0.77564 0.48619-0.21655-0.52958
   1  -7 -23 1971.75  617.85   1 0.56486-0.46259-0.82425 0.53493-0.03922-0.70699
  -1   7 -24 1373.09  545.18   1 0.54807-0.65028-0.46577 0.75507-0.69474-0.08362
   1   7 -24  819.89  454.35   1 0.57906-0.47686-0.56808 0.85739-0.58477-0.19359
  -1  -7 -24  430.17  189.40   1 0.59534-0.69758-0.76574 0.47629-0.24330-0.53527
   1  -7 -24 1678.57  621.62   1 0.57132-0.46908-0.81766 0.52821-0.07079-0.70778
  -1   8   013019.33 1445.74   1 0.16933-0.27153 0.23340 0.09706-0.95752 0.95752
   1   8   011770.84  638.49   1 0.25901-0.15682 0.10093 0.22952-0.96058 0.96058
   1  -8   010418.79  871.24   1 0.36233-0.26014-0.06900-0.26147-0.92948 0.92948
  -1  -8   010305.10  406.91   1 0.49629-0.59848-0.33450 0.00399-0.80112 0.80112
  -1   8   0 9868.30 1029.15   1 0.50370-0.60595 0.33688-0.00645-0.79547 0.79547
   1   8   010186.86  585.26   1 0.39623-0.29403 0.05836 0.27194-0.91629 0.91629
   1  -8   010558.83 1072.73   1 0.32922-0.22699-0.07915-0.25126-0.94092 0.94092
  -1   8   125597.78  859.66   1 0.11322-0.21541 0.31026 0.02020-0.94388 0.97631
   1   8   126810.75  994.95   1 0.17752-0.07533 0.22181 0.10865-0.95879 0.99122
  -1   8  -124318.31  942.24   1 0.22215-0.32434 0.15687 0.17359-0.96230 0.92987
   1  -8  -124077.79 1053.86   1 0.31681-0.21462 0.00843-0.33889-0.94844 0.91601
   1   8  -126159.28  832.30   1 0.32892-0.22673-0.01176 0.34223-0.94428 0.91185
   1  -8   126922.19 1477.99   1 0.40477-0.30259-0.14604-0.18444-0.90267 0.93510
  -1  -8  -125375.63  800.69   1 0.45171-0.55390-0.23793-0.09254-0.85984 0.82742
  -1  -8   125941.50 1170.70   1 0.53083-0.63302-0.41900 0.08848-0.73665 0.76905
  -1   8   125737.92 1129.68   1 0.52703-0.62927 0.41831-0.08787-0.73975 0.77219
  -1   8  -124643.97  996.03   1 0.47302-0.57526 0.24593 0.08450-0.84602 0.81359
   1   8   123106.32  867.43   1 0.43040-0.32819 0.13690 0.19339-0.89219 0.92459
   1  -8  -124654.79  778.72   1 0.38135-0.27915 0.02610-0.35640-0.92405 0.89165
   1   8  -125057.63  953.02   1 0.35904-0.25681-0.02005 0.35047-0.93310 0.90067
  -1  -8  -127032.49  896.52   1 0.27699-0.37922-0.17560-0.15480-0.94468 0.91226
   1  -8   125244.50  791.19   1 0.26734-0.16510-0.19255-0.13785-0.94416 0.97659
  -1   8   280390.05 2253.78   1 0.05525-0.15744 0.38527-0.05480-0.92114 0.98600
   1   8   282019.29 2150.51   1 0.08775 0.01443 0.34375-0.01329-0.93494 0.99980
   1  -8  -282609.37 2161.95   1 0.26970-0.16751 0.08429-0.41476-0.95924 0.89437
  -1   8  -274794.56 2047.78   1 0.27064-0.37283 0.08282 0.24764-0.95911 0.89424
   1   8  -278337.57 2119.27   1 0.38618-0.28400-0.11168 0.44216-0.91563 0.85078
  -1  -8  -279732.32 2063.19   1 0.39726-0.49944-0.13202-0.19845-0.90815 0.84330
   1  -8   280367.10 2127.86   1 0.44328-0.34110-0.22081-0.10966-0.86875 0.93360
  -1  -8   278699.42 2052.19   1 0.55658-0.65878-0.49099 0.16035-0.67017 0.73504
  -1   8   277910.42 2110.43   1 0.54360-0.64579 0.48942-0.15903-0.68188 0.74676
   1   8   279389.49 2178.17   1 0.46091-0.35870 0.21370 0.11659-0.86133 0.92613
  -1   8  -280044.79 2147.28   1 0.43480-0.53701 0.14755 0.18274-0.88835 0.82354
   1  -8  -279636.84 2103.64   1 0.42322-0.32102 0.11984-0.45014-0.89806 0.83325
  -1  -8  -280713.53 2134.89   1 0.31793-0.42017-0.10072-0.22969-0.94274 0.87789
   1   8   3 7137.66  404.18   1-0.00483 0.10704 0.45840-0.12787-0.88873 0.98599
  -1   8   3 5433.85  900.18   1-0.00304-0.09916 0.45628-0.12575-0.88982 0.98709
   1  -8  -3 6779.58 1036.56   1 0.22226-0.12007 0.15671-0.48718-0.96230 0.86500
  -1   8  -3 5701.73  418.36   1 0.31407-0.41626 0.01296 0.31750-0.94930 0.85200
  -1  -8  -3 5920.54  607.12   1 0.33466-0.43685-0.02145-0.30901-0.94209 0.84479
   1   8  -3 6489.62  787.70   1 0.43140-0.32921-0.19716 0.52764-0.88035 0.78307
   1  -8   3 5662.95 1022.88   1 0.47713-0.37494-0.29166-0.03884-0.82901 0.92623
  -1  -8   3 7707.81  466.01   1 0.57461-0.67681-0.55109 0.22046-0.60506 0.70236
  -1   8   3 6637.03 1284.95   1 0.55470-0.65689 0.55065-0.22027-0.62376 0.72109
   1   8   3 7519.76 1361.17   1 0.48755-0.38531 0.28731 0.04312-0.82446 0.92177
   1  -8  -3 6346.97  418.38   1 0.45606-0.35386 0.20100-0.53131-0.86694 0.76973
  -1   8  -3 7137.64 1020.91   1 0.39031-0.49252 0.04540 0.28490-0.91955 0.82234
  -1  -8  -3 5732.43  912.09   1 0.35425-0.45649-0.02977-0.30064-0.93467 0.83739
   1   8  -3 6627.65  905.53   1 0.28038-0.17815-0.16958 0.49999-0.94478 0.84750
   1   8   4 5479.60  831.47   1-0.09427 0.19648 0.55890-0.22837-0.82385 0.95353
  -1   8   4 4324.92  706.51   1-0.06016-0.04204 0.52178-0.19125-0.85095 0.98063
   1  -8  -4 4654.01  775.25   1 0.17587-0.07368 0.22415-0.55462-0.95855 0.82883
  -1  -8  -4 5338.56  605.98   1 0.26771-0.36990 0.08741-0.41787-0.95952 0.82978
  -1   8  -4 5859.97  922.40   1 0.35222-0.45441-0.05135 0.38184-0.93450 0.80480
   1   8  -4 5324.87  456.77   1 0.46626-0.36407-0.26829 0.59880-0.84297 0.71335
  -1  -8   4 4871.31  570.62   1 0.58673-0.68893-0.60090 0.27027-0.54282 0.67254
  -1   8   4 5290.66  852.91   1 0.56129-0.66348 0.60282-0.27243-0.56705 0.69682
   1   8   4 5149.03  714.50   1 0.50965-0.40741 0.35632-0.02588-0.78312 0.91287
   1  -8  -4 4541.50  651.01   1 0.48154-0.37930 0.26989-0.60033-0.83382 0.70407
  -1   8  -4 5158.36  615.34   1 0.34089-0.44312-0.05642 0.38683-0.93840 0.80869
   1   8   5 1349.60  255.26   1-0.17586 0.27808 0.64135-0.31061-0.74681 0.90894
  -1   8   5 1327.87  289.48   1-0.11488 0.01266 0.58054-0.24980-0.80608 0.96821
   1  -8  -5 1274.37  253.45   1 0.13155-0.02935 0.28563-0.61610-0.94926 0.78711
  -1  -8  -5 1201.19  231.46   1 0.20032-0.30251 0.18898-0.51945-0.96132 0.79915
  -1   8  -5 1033.53  274.66   1 0.38508-0.48726-0.10966 0.44015-0.91634 0.75421
   1   8  -5 1594.30  278.77   1 0.49297-0.39078-0.32691 0.65743-0.80628 0.64426
  -1  -8   5 1447.94  295.71   1 0.59433-0.69657-0.64212 0.31151-0.48418 0.64632
  -1   8   5  713.17  180.71   1 0.56409-0.66630 0.64715-0.31686-0.51283 0.67500
   1   8   5 1459.18  371.70   1 0.52749-0.42525 0.42007-0.08963-0.73843 0.90062
   1  -8  -5 1336.06  255.87   1 0.50072-0.39848 0.32739-0.65783-0.80130 0.63911
  -1   8  -5 1205.63  221.16   1 0.28949-0.39173-0.15325 0.48366-0.94482 0.78269
   1   8   6 3128.87  368.11   1-0.24699 0.34922 0.70549-0.37475-0.66428 0.85883
  -1   8   6 3113.96  473.84   1-0.16630 0.06408 0.63216-0.30142-0.75677 0.95133
  -1  -8  -6 2865.33  236.60   1 0.13628-0.23848 0.27919-0.60966-0.95051 0.75593
  -1   8  -6 3737.92  421.90   1 0.41302-0.51520-0.16161 0.49209-0.89626 0.70171
   1   8  -6 2796.91  391.45   1 0.51327-0.41108-0.37467 0.70518-0.77211 0.57769
  -1  -8   6 2846.52  374.98   1 0.59852-0.70076-0.67623 0.34562-0.42951 0.62407
  -1   8   6 3948.12  705.42   1 0.56446-0.66668 0.68466-0.35437-0.46109 0.65570
   1   8   6 3140.73  454.82   1 0.54126-0.43907 0.47835-0.14797-0.69152 0.88618
   1  -8  -6 3177.07  479.18   1 0.51514-0.41290 0.37498-0.70542-0.77072 0.57609
   1   8   7  380.25  117.34   1-0.30667 0.40880 0.75327-0.42291-0.58182 0.80871
  -1   8   7  368.28  120.39   1-0.21383 0.11161 0.67656-0.34582-0.70465 0.93163
  -1  -8  -7  214.41  150.81   1 0.07791-0.18011 0.35646-0.68693-0.93105 0.70404
  -1   8  -7 -175.02  194.40   1 0.43654-0.53872-0.20731 0.53780-0.87547 0.64849
   1   8  -7  517.24  237.44   1 0.52867-0.42648-0.41337 0.74388-0.74136 0.51452
  -1   8   7  651.92  196.76   1 0.56279-0.66501 0.71650-0.38620-0.41217 0.63921
   1   8   7  652.10  171.24   1 0.55147-0.44928 0.53081-0.20042-0.64351 0.87061
   1   8   8 2343.40  386.23   1-0.35655 0.45868 0.78751-0.45715-0.50268 0.76198
  -1   8   8 2188.84  409.78   1-0.25723 0.15501 0.71407-0.38333-0.65109 0.91051
  -1  -8  -8 1953.12  336.07   1 0.02669-0.12891 0.42055-0.75107-0.90687 0.64750
  -1   8  -8 2204.99  368.80   1 0.45618-0.55836-0.24712 0.57761-0.85488 0.59547
   1   8  -8 2377.05  350.40   1 0.54038-0.43819-0.44465 0.77516-0.71432 0.45509
  -1   8   8 2153.19  453.66   1 0.55957-0.66178 0.74359-0.41329-0.36599 0.62547
   1   8   8 1931.43  362.90   1 0.55849-0.45630 0.57777-0.24738-0.59520 0.85474
  -1   8   9 9258.71 1218.78   1-0.29622 0.19409 0.74545-0.41508-0.59712 0.88883
  -1  -8  -9 5899.25  859.96   1-0.01738-0.08482 0.47311-0.80364-0.88083 0.58903
  -1   8  -9 7694.30  558.05   1 0.47235-0.57454-0.28130 0.61181-0.83531 0.54367
   1   8  -9 8187.02  922.49   1 0.54947-0.44727-0.46982 0.80045-0.69089 0.39901
  -1   8   9 8106.44  962.50   1 0.55515-0.65737 0.76671-0.43642-0.32240 0.61432
   1   8   9 9352.85 1403.84   1 0.56275-0.46056 0.61956-0.28918-0.54721 0.83919
  -1   8  10  729.36  349.57   1-0.33149 0.22936 0.77099-0.44062-0.54376 0.86789
  -1  -8 -10  596.04  142.37   1-0.05459-0.04761 0.51557-0.84610-0.85510 0.53089
  -1   8 -10  813.57  362.49   1 0.48583-0.58802-0.31081 0.64133-0.81692 0.49287
   1   8 -10 1174.62  385.27   1 0.55628-0.45408-0.49006 0.82069-0.67110 0.34679
  -1   8  10  605.63  230.76   1 0.55024-0.65246 0.78635-0.45594-0.28084 0.60531
   1   8  10  860.74  191.50   1 0.56439-0.46218 0.65672-0.32643-0.50016 0.82451
  -1   8  11 1859.93  403.51   1-0.36307 0.26094 0.79157-0.46121-0.49151 0.84805
  -1  -8 -11 1790.29  355.83   1-0.08563-0.01657 0.54964-0.88017-0.83099 0.47436
  -1   8 -11 1537.52  433.81   1 0.49693-0.59912-0.33598 0.66649-0.80010 0.44365
   1   8 -11 2216.63  444.18   1 0.56147-0.45927-0.50624 0.83688-0.65456 0.29781
  -1   8  11 3343.99  775.84   1 0.54423-0.64644 0.80333-0.47292-0.24178 0.59870
   1   8  11 1898.97  455.28   1 0.56434-0.46212 0.68947-0.35917-0.45403 0.81081
  -1   8 -1218076.77  804.85   1 0.50605-0.60824-0.35731 0.68782-0.78500 0.39615
   1   8 -1216758.88 2013.47   1 0.56542-0.46322-0.51908 0.84971-0.64096 0.25178
  -1   8  1218181.83 2270.68   1 0.53765-0.63987 0.81794-0.48753-0.20466 0.59403
   1   8  1215776.80 1557.23   1 0.56263-0.46041 0.71834-0.38805-0.40916 0.79839
  -1   8 -13 1033.30  533.82   1 0.51351-0.61570-0.37526 0.70577-0.77167 0.35041
   1   8 -13 1159.49  348.47   1 0.56842-0.46622-0.52913 0.85977-0.63000 0.20839
  -1  -8 -13 1662.99  390.50   1 0.50122-0.60348-0.84470 0.51405 0.18776-0.60954
  -1   8  13 1178.99  325.39   1 0.53063-0.63285 0.83052-0.50010-0.16927 0.59108
   1   8  13 1483.76  532.83   1 0.55954-0.45732 0.74377-0.41348-0.36567 0.78732
  -1   8 -14 4556.82  858.47   1 0.51959-0.62178-0.39024 0.72075-0.76008 0.30642
   1   8 -14 3773.92  805.26   1 0.57065-0.46845-0.53685 0.86749-0.62139 0.16735
  -1  -8 -14 6052.09  822.96   1 0.51751-0.61978-0.84428 0.51364 0.13909-0.59332
  -1   8  14 4146.85  849.38   1 0.52325-0.62546 0.84134-0.51093-0.13543 0.58969
   1   8  14 4262.58  644.50   1 0.55529-0.45307 0.76612-0.43583-0.32357 0.77766
  -1   8 -15  777.00  437.15   1 0.52450-0.62669-0.40263 0.73314-0.75019 0.26412
   1   8 -15  504.53  337.11   1 0.57227-0.47007-0.54260 0.87323-0.61488 0.12840
  -1  -8 -15  538.03  313.09   1 0.53132-0.63358-0.84194 0.51129 0.09396-0.58063
  -1   8  15  357.04  250.60   1 0.51555-0.61777 0.85064-0.52023-0.10296 0.58967
   1   8  15  783.24  212.11   1 0.55049-0.44828 0.78552-0.45511-0.28265 0.76935
  -1   8 -16 3827.75  572.42   1 0.52842-0.63062-0.41272 0.74323-0.74190 0.22342
   1   8 -16 1043.88  551.66   1 0.57340-0.47120-0.54665 0.87728-0.61023 0.09132
  -1  -8 -16 3311.53  459.62   1 0.54307-0.64533-0.83808 0.50743 0.05189-0.57100
   1   8  16 1460.30  537.96   1 0.54448-0.44226 0.80270-0.47229-0.24330 0.76245
  -1   8 -17 7959.69 1220.79   1 0.53151-0.63371-0.42079 0.75130-0.73513 0.18425
   1   8 -17 6719.03  970.97   1 0.57411-0.47191-0.54923 0.87987-0.60723 0.05589
  -1  -8 -17 5597.77  965.09   1 0.55311-0.65538-0.83301 0.50236 0.01244-0.56400
   1  -8 -17 6975.02 1311.79   1 0.49222-0.38996-0.84403 0.51339 0.21287-0.76443
   1   8  17 5545.59 1066.17   1 0.53776-0.43555 0.81772-0.48731-0.20525 0.75684
  -1   8 -18 1067.56  314.56   1 0.53389-0.63608-0.42707 0.75758-0.72977 0.14648
   1   8 -18 1269.44  507.44   1 0.57446-0.47226-0.55054 0.88118-0.60570 0.02193
  -1  -8 -18 1663.30  536.71   1 0.56172-0.66399-0.82695 0.49630-0.02472-0.55927
   1  -8 -18 2129.58  789.57   1 0.50651-0.40424-0.84481 0.51416 0.17244-0.75645
   1   8  18  420.19  291.14   1 0.53046-0.42824 0.83080-0.50039-0.16842 0.75247
  -1   8 -19 3234.73  526.50   1 0.53564-0.63783-0.43176 0.76227-0.72571 0.11002
   1   8 -19 3582.00  470.44   1 0.57451-0.47231-0.55073 0.88136-0.60549-0.01070
  -1  -8 -19 4001.97  798.71   1 0.56915-0.67139-0.82006 0.48925-0.05972-0.55665
   1  -8 -19 4508.09 1445.50   1 0.51929-0.41702-0.84410 0.51345 0.13351-0.74996
   1   8  19 1913.80  570.02   1 0.52263-0.42042 0.84215-0.51174-0.13275 0.74924
  -1   8 -20 2470.03  676.96   1 0.53685-0.63904-0.43501 0.76552-0.72287 0.07478
   1   8 -20 4550.05  760.75   1 0.57429-0.47209-0.54990 0.88053-0.60645-0.04217
  -1  -8 -20 3621.96  889.23   1 0.57548-0.67772-0.81247 0.48167-0.09323-0.55558
   1  -8 -20 3999.00  688.27   1 0.53073-0.42846-0.84208 0.51144 0.09598-0.74487
   1   8  20 2859.90  679.93   1 0.51436-0.41215 0.85193-0.52151-0.09815 0.74709
  -1   8 -21 2559.85 1068.37   1 0.53757-0.63977-0.43697 0.76748-0.72115 0.04065
   1   8 -21 5316.95 1462.35   1 0.57382-0.47161-0.54817 0.87880-0.60846-0.07259
  -1  -8 -21 3539.11 1034.48   1 0.58090-0.68314-0.80427 0.47346-0.12525-0.55599
   1  -8 -21 3707.81  918.56   1 0.54095-0.43869-0.83892 0.50827 0.05974-0.74108
  -1   8 -22 1381.14  306.76   1 0.53787-0.64006-0.43777 0.76828-0.72045 0.00754
   1   8 -22  651.43  226.84   1 0.57311-0.47091-0.54561 0.87625-0.61142-0.10207
  -1  -8 -22  642.55  322.91   1 0.58551-0.68775-0.79551 0.46470-0.15598-0.55770
   1  -8 -22  640.06  323.90   1 0.55009-0.44783-0.83473 0.50408 0.02468-0.73847
  -1   8 -23  362.08  212.44   1 0.53776-0.63996-0.43750 0.76801-0.72069-0.02461
   1   8 -23  484.69  223.01   1 0.57219-0.46999-0.54230 0.87293-0.61522-0.13070
  -1  -8 -23 1733.44  494.55   1 0.58939-0.69163-0.78624 0.45543-0.18558-0.56055
   1  -8 -23  821.29  349.45   1 0.55824-0.45598-0.82962 0.49897-0.00927-0.73695
  -1   8 -24  273.96  251.61   1 0.53730-0.63949-0.43624 0.76675-0.72179-0.05591
  -1  -8 -24 1296.93  422.65   1 0.59261-0.69485-0.77649 0.44568-0.21418-0.56439
   1  -8 -24  317.85  354.36   1 0.56553-0.46329-0.82364 0.49284-0.04205-0.73651
  -1   9   0  495.00  350.89   1 0.16154-0.26373 0.24433 0.12743-0.95613 0.95613
   1   9   0  567.50  204.94   1 0.23686-0.13467 0.13482 0.23694-0.96214 0.96214
  -1  -9   0  230.57  157.72   1 0.49720-0.59939-0.33660-0.03521-0.79967 0.79967
  -1   9   0  314.18  238.86   1 0.50424-0.60648 0.33861 0.03312-0.79440 0.79440
   1   9   0  -49.33  298.07   1 0.40917-0.30696 0.08731 0.28428-0.90827 0.90827
   1  -9   0  227.16  112.08   1 0.31061-0.20837-0.11448-0.25723-0.94361 0.94361
  -1   9   126068.23 1555.83   1 0.11044-0.21263 0.31396 0.05781-0.94298 0.97541
   1   9   124932.91 1022.78   1 0.16504-0.06284 0.23943 0.13233-0.95678 0.98921
  -1   9  -124122.26 1069.68   1 0.20982-0.31201 0.17510 0.19667-0.96193 0.92949
   1   9  -126322.45 1784.36   1 0.30020-0.19801 0.03567 0.33610-0.95320 0.92077
  -1  -9  -125301.02 1714.06   1 0.45916-0.56135-0.25336-0.11846-0.85145 0.81905
  -1  -9   125922.14 1063.67   1 0.52784-0.63003-0.41120 0.03938-0.74316 0.77556
  -1   9   126360.98 1129.89   1 0.52506-0.62730 0.41079-0.03904-0.74535 0.77779
  -1   9  -127618.75 1164.20   1 0.47790-0.58014 0.25956 0.11218-0.83918 0.80674
   1   9   124837.26 1333.84   1 0.43893-0.33673 0.15767 0.21391-0.88457 0.91697
   1   9  -128664.25 1261.99   1 0.37698-0.27478 0.01681 0.35477-0.92606 0.89366
   1  -9  -125263.33 1084.41   1 0.35842-0.25618-0.02133-0.35038-0.93331 0.90088
   1  -9   122185.45 1229.44   1 0.25528-0.15305-0.21338-0.15833-0.94302 0.97545
  -1   9   2 1734.15  277.06   1 0.05760-0.15979 0.38231-0.01054-0.92223 0.98709
   1   9   2 1937.06  418.02   1 0.08700 0.01518 0.34473 0.02704-0.93466 0.99951
  -1   9  -2 1257.28  273.08   1 0.25452-0.35671 0.10786 0.26390-0.96103 0.89616
   1   9  -2 2207.59  304.28   1 0.35407-0.25189-0.05456 0.42636-0.93362 0.86877
  -1  -9  -2 1213.50  302.03   1 0.41380-0.51599-0.16310-0.20869-0.89563 0.83078
  -1  -9   2 1793.42  411.05   1 0.55180-0.65400-0.47662 0.10466-0.68435 0.74921
  -1   9   2 1548.43  250.05   1 0.54060-0.64279 0.47535-0.10367-0.69410 0.75899
   1   9   2 1068.60  317.90   1 0.46574-0.36353 0.22659 0.14499-0.85541 0.92022
  -1   9  -2 1903.70  345.91   1 0.44592-0.54812 0.17505 0.19653-0.87778 0.81297
   1  -9  -2 1584.06  270.74   1 0.39865-0.29644 0.06370-0.43530-0.91488 0.85007
   1   9  -2 2152.84  479.07   1 0.34293-0.24070-0.05238 0.42410-0.93789 0.87304
  -1   9   3 1249.70  316.52   1 0.00416-0.10637 0.44772-0.07587-0.89416 0.99142
   1   9   3 1712.95  272.55   1 0.00629 0.09591 0.44517-0.07333-0.89542 0.99268
  -1   9  -3 1640.66  336.20   1 0.29507-0.39726 0.04396 0.32780-0.95446 0.85715
  -1  -9  -3 1196.25  264.53   1 0.36237-0.46455-0.06907-0.30272-0.92947 0.83219
   1   9  -3 1922.29  322.20   1 0.39845-0.29627-0.13423 0.50603-0.90731 0.81003
  -1  -9   3 1227.13  270.80   1 0.56952-0.67172-0.53292 0.16096-0.62580 0.72310
  -1   9   3  775.38  396.15   1 0.55174-0.65393 0.53242-0.16074-0.64194 0.73927
   1   9   3 1468.23  312.01   1 0.48948-0.38724 0.29303 0.07870-0.82129 0.91860
   1  -9  -3 1429.20  205.38   1 0.43138-0.32917 0.13927-0.51086-0.89135 0.79413
  -1   9  -3 1358.70  299.68   1 0.40926-0.51147 0.08753 0.28405-0.90820 0.81099
   1   9  -3 1715.39  371.88   1 0.30812-0.20589-0.11911 0.49083-0.94385 0.84657
   1   9   417649.71 1025.58   1-0.07306 0.17527 0.53599-0.16415-0.84105 0.97073
  -1   9   415414.93 2119.71   1-0.04868-0.05353 0.50893-0.13709-0.85942 0.98911
  -1  -9  -416548.22  796.28   1 0.30663-0.40882 0.02518-0.39695-0.95149 0.82175
  -1   9  -415675.90  793.88   1 0.33120-0.43339-0.01561 0.38739-0.94342 0.81369
   1   9  -417464.75 1833.63   1 0.43434-0.33215-0.20296 0.57475-0.87758 0.74787
  -1  -9   415930.80 1101.37   1 0.58223-0.68443-0.58097 0.20901-0.56874 0.69847
  -1   9   416375.38 1202.29   1 0.55905-0.66124 0.58231-0.21063-0.59022 0.71999
   1   9   415859.63 1919.86   1 0.50952-0.40727 0.35587 0.01586-0.78341 0.91316
   1  -9  -416572.58  759.79   1 0.45767-0.35546 0.20519-0.57678-0.86511 0.73550
  -1   9  -418016.60  814.17   1 0.36857-0.47081-0.00045 0.37217-0.92959 0.79988
   1   9  -418153.20 2069.15   1 0.27325-0.17101-0.18219 0.55391-0.94452 0.81481
   1   9   5 1652.06  245.53   1-0.14767 0.24990 0.61388-0.24179-0.77546 0.93759
  -1   9   5 1111.00  241.40   1-0.09992-0.00228 0.56491-0.19307-0.81907 0.98118
  -1  -9  -5 1356.03  391.00   1 0.24956-0.35175 0.11548-0.48726-0.96144 0.79927
  -1   9  -5 1509.15  361.52   1 0.36297-0.46515-0.07012 0.44192-0.92915 0.76702
   1   9  -5 2020.87  400.93   1 0.46285-0.36066-0.26108 0.63291-0.84711 0.68508
  -1  -9   5 1515.42  324.17   1 0.59091-0.69315-0.62184 0.24990-0.51394 0.67608
  -1   9   5 1353.65  252.68   1 0.56320-0.66539 0.62568-0.25400-0.53974 0.70195
   1   9   5 2032.72  409.49   1 0.52606-0.42382 0.41459-0.04285-0.74254 0.90473
  -1   9  -5 1736.23  264.59   1 0.32576-0.42800-0.08581 0.45752-0.94154 0.77940
   1   9   6 6026.00  380.56   1-0.21512 0.31735 0.67772-0.30563-0.70314 0.89770
  -1   9   6 5431.58  657.64   1-0.14878 0.04656 0.61498-0.24289-0.77437 0.96893
  -1  -9  -6 4842.91  496.34   1 0.19363-0.29583 0.19874-0.57051-0.96073 0.76615
  -1   9  -6 6012.45  723.16   1 0.39047-0.49265-0.11950 0.49130-0.91282 0.71827
   1   9  -6 6580.98  909.16   1 0.48549-0.38330-0.31007 0.68189-0.81740 0.62297
  -1   9   6 5351.03  886.86   1 0.56453-0.66674 0.66335-0.29178-0.49118 0.68579
   1   9   6 7069.84  967.67   1 0.53919-0.43700 0.46896-0.09728-0.69952 0.89418
  -1   9  -6 6069.90  790.12   1 0.28237-0.38461-0.16603 0.53775-0.94482 0.75026
   1   9   7  296.49  135.26   1-0.27389 0.37602 0.72803-0.35637-0.62844 0.85533
  -1   9   7  679.73  242.74   1-0.19464 0.09241 0.65903-0.28694-0.72649 0.95347
  -1  -9  -7  -36.31  127.75   1 0.14071-0.24291 0.27314-0.64492-0.95162 0.72461
  -1   9  -7  412.36  212.11   1 0.41407-0.51626-0.16361 0.53541-0.89541 0.66843
   1   9  -7  727.22  177.24   1 0.50334-0.40115-0.35090 0.72273-0.78962 0.56279
  -1   9   7  172.89  135.56   1 0.56410-0.66632 0.69592-0.32434-0.44437 0.67142
   1   9   7  796.87  338.58   1 0.54930-0.44711 0.51859-0.14690-0.65523 0.88233
   1   9   8 2041.44  380.09   1-0.32476 0.42690 0.76631-0.39465-0.55433 0.81363
  -1   9   8 2426.89  570.83   1-0.23715 0.13492 0.69709-0.32500-0.67662 0.93603
  -1  -9  -8 2519.20  309.66   1 0.09232-0.19452 0.33780-0.70958-0.93667 0.67723
  -1   9  -8 3184.09  619.53   1 0.43418-0.53636-0.20264 0.57443-0.87773 0.61833
   1   9  -8 2600.99  439.96   1 0.51739-0.41520-0.38478 0.75661-0.76435 0.50511
  -1   9   8 2110.84  354.06   1 0.56207-0.66429 0.72413-0.35255-0.39962 0.65910
   1   9   8 3183.59  650.75   1 0.55661-0.45442 0.56364-0.19196-0.61031 0.86985
   1   9   9 5567.63  941.94   1-0.36798 0.47011 0.79455-0.42289-0.48298 0.77469
  -1   9   9 5706.40 1017.59   1-0.27590 0.17376 0.72963-0.35798-0.62570 0.91741
  -1  -9  -9 5929.48  601.82   1 0.04918-0.15137 0.39288-0.76465-0.91827 0.62640
  -1   9  -9 6376.00 1102.64   1 0.45120-0.55338-0.23687 0.60867-0.86041 0.56857
   1   9  -9 7003.29 1108.37   1 0.52845-0.42625-0.41278 0.78461-0.74185 0.45020
  -1   9   9 7168.52  911.58   1 0.55875-0.66097 0.74860-0.37702-0.35689 0.64881
   1   9   9 5522.26 1081.30   1 0.56143-0.45924 0.60431-0.23263-0.56532 0.85730
  -1   9  1010310.90 1142.92   1-0.31146 0.20933 0.75679-0.38513-0.57467 0.89880
  -1  -9 -1010178.63  780.78   1 0.01154-0.11375 0.43889-0.81073-0.89846 0.57425
  -1   9 -1011816.63 1585.31   1 0.46541-0.56760-0.26649 0.63831-0.84401 0.51997
   1   9 -1013202.94 1909.43   1 0.53715-0.43496-0.43583 0.80766-0.72215 0.39810
  -1   9  1012250.37 1576.51   1 0.55441-0.65663 0.76986-0.39828-0.31611 0.64046
   1   9  1010992.50 1271.18   1 0.56381-0.46160 0.64096-0.26938-0.52084 0.84519
  -1   9  11 4863.37  938.73   1-0.34370 0.24157 0.77921-0.40755-0.52410 0.88064
  -1   9 -11 5454.59  951.86   1 0.47744-0.57963-0.29232 0.66414-0.82861 0.47215
   1   9 -11 5074.71  515.90   1 0.54417-0.44197-0.45466 0.82663-0.70509 0.34834
  -1   9  11 4787.45  967.01   1 0.54966-0.65188 0.78819-0.41647-0.27679 0.63371
   1   9  11 4507.94  836.55   1 0.56459-0.46238 0.67368-0.30210-0.47683 0.83362
  -1   9  12  747.94  358.39   1-0.37282 0.27069 0.79744-0.42578-0.47443 0.86338
  -1   9 -12 1110.97  362.06   1 0.48749-0.58968-0.31453 0.68636-0.81450 0.42564
   1   9 -12 2455.64  648.88   1 0.54955-0.44735-0.47003 0.84200-0.69069 0.30151
  -1   9  12 1527.11  338.23   1 0.54385-0.64606 0.80427-0.43255-0.23951 0.62887
   1   9  12 1057.67  390.25   1 0.56376-0.46154 0.70290-0.33132-0.43369 0.82291
  -1   9 -13 1019.67  431.09   1 0.49586-0.59805-0.33352 0.70535-0.80179 0.38053
   1   9 -13 1084.82  545.17   1 0.55376-0.45155-0.48244 0.85440-0.67867 0.25705
  -1   9  13 1193.44  352.74   1 0.53749-0.63970 0.81827-0.44656-0.20377 0.62558
   1   9  13 1669.29  358.43   1 0.56154-0.45933 0.72893-0.35736-0.39155 0.81320
  -1   9 -14 1952.73  461.77   1 0.50280-0.60499-0.34963 0.72145-0.79053 0.33686
   1   9 -14 1453.11  384.53   1 0.55702-0.45482-0.49233 0.86429-0.66883 0.21478
  -1  -9 -14 2533.47  386.38   1 0.50114-0.60341-0.84469 0.47272 0.18797-0.64220
  -1   9  14 1834.92  437.07   1 0.53067-0.63288 0.83046-0.45875-0.16943 0.62369
   1   9  14 2499.46  509.72   1 0.55814-0.45593 0.75208-0.38050-0.35048 0.80457
  -1   9 -15  -71.35  348.63   1 0.50851-0.61070-0.36317 0.73499-0.78071 0.29464
   1   9 -15  500.16  372.62   1 0.55951-0.45731-0.50005 0.87201-0.66097 0.17450
  -1  -9 -15  497.15  201.44   1 0.51708-0.61935-0.84433 0.47235 0.14045-0.62712
  -1   9  15  578.16  269.54   1 0.52346-0.62568 0.84105-0.46934-0.13638 0.62308
   1   9  15  830.89  381.81   1 0.55373-0.45152 0.77262-0.40104-0.31052 0.79705
  -1   9 -16  361.86  320.54   1 0.51317-0.61536-0.37442 0.74625-0.77230 0.25382
   1   9 -16  544.72  411.02   1 0.56136-0.45916-0.50591 0.87787-0.65491 0.13600
  -1  -9 -16  543.10  236.75   1 0.53074-0.63300-0.84208 0.47010 0.09594-0.61505
  -1   9  16  741.31  246.42   1 0.51593-0.61814 0.85023-0.47851-0.10447 0.62362
   1   9  16  256.02  329.01   1 0.54888-0.44666 0.79060-0.41888-0.27143 0.79058
  -1   9 -17 3724.13  626.66   1 0.51693-0.61912-0.38364 0.75546-0.76524 0.21436
   1   9 -17 4356.00  601.41   1 0.56269-0.46049-0.51014 0.88211-0.65048 0.09914
  -1  -9 -17 5353.53  589.36   1 0.54248-0.64474-0.83832 0.46634 0.05409-0.60565
   1   9  17 2446.73  610.67   1 0.54286-0.44064 0.80665-0.43493-0.23367 0.78527
  -1   9 -18 2382.31  464.75   1 0.51990-0.62209-0.39103 0.76285-0.75946 0.17618
   1   9 -18 1769.65  455.79   1 0.56356-0.46135-0.51295 0.88492-0.64751 0.06374
  -1  -9 -18 1489.00  481.44   1 0.55259-0.65486-0.83332 0.46134 0.01459-0.59859
   1  -9 -18 1267.92  411.72   1 0.49507-0.39280-0.84430 0.47233 0.20504-0.78905
   1   9  18 1591.28  551.29   1 0.53619-0.43397 0.82078-0.44907-0.19697 0.78102
  -1   9 -19 1387.62  322.46   1 0.52219-0.62438-0.39678 0.76860-0.75489 0.13920
   1   9 -19 2007.79  515.74   1 0.56403-0.46183-0.51450 0.88646-0.64586 0.02966
  -1  -9 -19 2693.67  467.80   1 0.56131-0.66358-0.82728 0.45531-0.02285-0.59359
   1  -9 -19 1847.53  494.34   1 0.50894-0.40667-0.84478 0.47281 0.16525-0.78170
   1   9  19 1017.01  391.11   1 0.52895-0.42673 0.83318-0.46146-0.16128 0.77778
  -1   9 -20  834.09  339.20   1 0.52388-0.62607-0.40105 0.77288-0.75146 0.10337
   1   9 -20  580.89  241.85   1 0.56416-0.46196-0.51492 0.88689-0.64541-0.00321
  -1  -9 -20 -283.01  267.18   1 0.56886-0.67110-0.82036 0.44820-0.05828-0.59053
   1  -9 -20 1210.38  554.87   1 0.52141-0.41914-0.84383 0.47185 0.12677-0.77567
   1   9  20  761.92  353.60   1 0.52120-0.41899 0.84399-0.47227-0.12656 0.77550
  -1   9 -21 1211.50  374.36   1 0.52503-0.62722-0.40398 0.77581-0.74908 0.06858
   1   9 -21  827.57  384.80   1 0.56398-0.46178-0.51433 0.88630-0.64604-0.03501
   1  -9 -21 1850.28  521.99   1 0.53260-0.43034-0.84161 0.46963 0.08953-0.77087
   1   9  21 1385.82  403.69   1 0.51301-0.41079 0.85335-0.48163-0.09273 0.77412
  -1   9 -22  724.71  345.95   1 0.52570-0.62789-0.40569 0.77752-0.74769 0.03479
   1   9 -22  330.64  417.49   1 0.56351-0.46131-0.51282 0.88478-0.64765-0.06584
  -1  -9 -22  362.88  173.91   1 0.58086-0.68310-0.80434 0.43219-0.12498-0.58870
   1  -9 -22 1215.36  478.27   1 0.54265-0.44038-0.83825 0.46627 0.05344-0.76723
  -1   9 -23 1158.82  529.24   1 0.52593-0.62812-0.40628 0.77811-0.74721 0.00190
   1   9 -23  286.75  379.60   1 0.56279-0.46058-0.51046 0.88243-0.65014-0.09578
  -1  -9 -23  -84.72  263.33   1 0.58557-0.68781-0.79538 0.42323-0.15640-0.58973
   1  -9 -23  127.63  334.87   1 0.55165-0.44938-0.83387 0.46189 0.01843-0.76466
  -1  10   0  912.33  354.21   1 0.15250-0.25470 0.25691 0.15617-0.95432 0.95432
   1  10   0  363.69  124.12   1 0.21620-0.11401 0.16569 0.24738-0.96218 0.96218
  -1 -10   0  915.37  342.08   1 0.49990-0.60209-0.34286-0.07027-0.79532 0.79532
  -1  10   0  360.27  200.95   1 0.50604-0.60828 0.34443 0.06861-0.79074 0.79074
   1  10   0  999.12  249.12   1 0.42110-0.31889 0.11485 0.29803-0.89971 0.89971
   1 -10   0 1166.64  320.58   1 0.29317-0.19094-0.14659-0.26642-0.94475 0.94475
  -1  10   1 5741.52 1008.46   1 0.10553-0.20772 0.32046 0.09261-0.94136 0.97379
   1  10   1 6382.56  390.94   1 0.15187-0.04967 0.25779 0.15528-0.95418 0.98661
  -1  10  -1 5247.15  883.20   1 0.19707-0.29927 0.19376 0.21931-0.96104 0.92861
   1  10  -1 5450.20  846.22   1 0.27410-0.17191 0.07737 0.33570-0.95858 0.92614
  -1 -10  -1 6421.23  469.33   1 0.46705-0.56924-0.26996-0.14317-0.84201 0.80960
  -1 -10   1 5969.03  345.18   1 0.52709-0.62928-0.40927-0.00386-0.74475 0.77716
  -1  10   1 6262.36  946.94   1 0.52456-0.62680 0.40893 0.00410-0.74672 0.77916
  -1  10  -1 6588.45  838.58   1 0.48325-0.58549 0.27479 0.13825-0.83123 0.79880
   1  10   1 6800.67  726.16   1 0.44726-0.34505 0.17843 0.23444-0.87642 0.90882
   1  10  -1 5326.92  968.79   1 0.39290-0.29069 0.05104 0.36184-0.91816 0.88575
   1 -10  -1 5661.81  334.99   1 0.33746-0.23522-0.06316-0.34985-0.93921 0.90679
  -1  10   2 3721.49  585.44   1 0.05696-0.15915 0.38312 0.02995-0.92193 0.98679
   1  10   2 4945.12  738.86   1 0.08270 0.01949 0.35030 0.06277-0.93297 0.99783
  -1  10  -2 4770.66  692.23   1 0.23858-0.34077 0.13221 0.28086-0.96207 0.89721
   1  10  -2 5598.23  714.93   1 0.32462-0.22243-0.00456 0.41764-0.94583 0.88096
  -1 -10  -2 4262.74  712.42   1 0.42861-0.53080-0.19169-0.22140-0.88291 0.81806
  -1 -10   2 3864.64  825.91   1 0.54911-0.65131-0.46875 0.05545-0.69191 0.75678
  -1  10   2 4961.18  674.84   1 0.53890-0.64108 0.46765-0.05467-0.70063 0.76551
   1  10   2 5159.15  468.66   1 0.47119-0.36895 0.24090 0.17214-0.84849 0.91336
  -1  10  -2 5221.94  551.56   1 0.45606-0.55826 0.20098 0.21189-0.86695 0.80214
   1 -10  -2 4383.14  952.22   1 0.37579-0.27358 0.01429-0.42717-0.92659 0.86178
   1  10  -2 5328.12 1008.23   1 0.36303-0.26079-0.01190 0.42492-0.93170 0.86684
   1  10   3  579.14  220.39   1 0.01114 0.09106 0.43937-0.02621-0.89823 0.99549
  -1  10   3  580.76  248.38   1 0.00766-0.10987 0.44354-0.03038-0.89621 0.99348
  -1  10  -3  330.53  306.30   1 0.27664-0.37883 0.07338 0.33970-0.95816 0.86086
   1  10  -3  220.26  185.25   1 0.36772-0.26553-0.07851 0.49161-0.92661 0.82933
  -1 -10  -3  283.33  109.56   1 0.38539-0.48758-0.11024-0.30286-0.91614 0.81886
  -1 -10   3  175.30  152.93   1 0.56603-0.66823-0.52109 0.10779-0.63880 0.73609
  -1  10   3  276.15  137.05   1 0.54966-0.65185 0.52058-0.10760-0.65334 0.75067
   1  10   3  575.67  331.39   1 0.49222-0.38998 0.30121 0.11183-0.81669 0.91400
  -1  10  -3  846.63  257.04   1 0.42530-0.52751 0.12475 0.28812-0.89640 0.79919
   1  10  -3  582.70  290.55   1 0.33234-0.23010-0.07312 0.48614-0.94031 0.84303
   1  10   4 1035.08  197.62   1-0.05997 0.16218 0.52156-0.10840-0.85110 0.98078
  -1  10   4  531.46  179.67   1-0.04140-0.06080 0.50072-0.08756-0.86461 0.99430
  -1  10  -4  513.75  294.93   1 0.31099-0.41318 0.01804 0.39503-0.95024 0.82050
  -1 -10  -4  604.08  178.92   1 0.33844-0.44063-0.02787-0.38520-0.94057 0.81083
   1  10  -4 1210.77  288.83   1 0.40367-0.30149-0.14397 0.55708-0.90350 0.77379
  -1 -10   4 1175.68  325.75   1 0.57874-0.68094-0.56680 0.15350-0.58633 0.71606
  -1  10   4  690.68  169.34   1 0.55718-0.65937 0.56779-0.15481-0.60593 0.73570
   1  10   4  736.87  322.46   1 0.51037-0.40813 0.35873 0.05431-0.78155 0.91130
  -1  10  -4  918.11  212.35   1 0.39143-0.49364 0.04783 0.36504-0.91896 0.78934
   1  10  -4  805.34  281.52   1 0.30135-0.19911-0.13165 0.54467-0.94437 0.81466
   1  10   5 1707.33  269.98   1-0.12816 0.23039 0.59422-0.18079-0.79402 0.95615
  -1  10   5 1570.68  304.63   1-0.08943-0.01277 0.55372-0.14056-0.82788 0.98998
  -1 -10  -5 1934.34  226.19   1 0.28978-0.39197 0.05247-0.46555-0.95565 0.79348
  -1  10  -5 1541.53  304.56   1 0.34162-0.44381-0.03311 0.44621-0.93925 0.77712
   1  10  -5 1566.14  400.08   1 0.43333-0.33115-0.20097 0.61408-0.87853 0.71640
  -1  10   5 1482.28  265.53   1 0.56192-0.66411 0.60963-0.19665-0.55908 0.72130
   1  10   5 2039.34  503.54   1 0.52563-0.42339 0.41295 0.00009-0.74375 0.90594
  -1  10  -5 1702.71  391.35   1 0.35518-0.45742-0.02789 0.44091-0.93437 0.77224
   1  10  -5 2270.79  415.62   1 0.27066-0.16842-0.18674 0.59976-0.94438 0.78224
   1  10   6 7376.12 1028.01   1-0.19140 0.29363 0.65602-0.24259-0.73006 0.92462
  -1  10   6 8190.80 1037.62   1-0.13573 0.03350 0.60190-0.18847-0.78694 0.98150
  -1 -10  -6 6604.92 1087.82   1 0.24100-0.34319 0.12854-0.54162-0.96197 0.76736
  -1  10  -6 7878.66 1041.24   1 0.36856-0.47074-0.08000 0.49311-0.92615 0.73159
   1  10  -6 7926.29 1202.52   1 0.45746-0.35527-0.24982 0.66296-0.85341 0.65898
  -1  10   6 6665.49  935.69   1 0.56407-0.66628 0.64664-0.23378-0.51349 0.70810
   1  10   6 8846.08 1162.00   1 0.53800-0.43581 0.46368-0.05070-0.70395 0.89860
  -1  10  -6 8331.41 1183.90   1 0.31812-0.42036-0.10035 0.51337-0.94272 0.74815
   1  10   7 7671.09  584.44   1-0.24850 0.35072 0.70676-0.29333-0.66236 0.88935
  -1  10   7 6671.88  991.79   1-0.17970 0.07748 0.64501-0.23158-0.74273 0.96972
  -1 -10  -7 7190.50  910.44   1 0.19383-0.29602 0.19846-0.61154-0.96075 0.73374
  -1  10  -7 7080.53 1181.71   1 0.39206-0.49425-0.12243 0.53553-0.91175 0.68477
   1  10  -7 7348.17 1107.78   1 0.47715-0.37496-0.29170 0.70484-0.82899 0.60215
  -1  10   7 7539.32 1066.70   1 0.56455-0.66677 0.67920-0.26633-0.46899 0.69604
   1  10   7 7324.06 1199.84   1 0.54779-0.44560 0.51050-0.09752-0.66280 0.88990
  -1  10  -7 7909.74  995.90   1 0.28121-0.38345-0.16810 0.58112-0.94480 0.71781
   1  10   8 7049.63 1028.79   1-0.29852 0.40066 0.74719-0.33424-0.59378 0.85308
  -1  10   8 6240.87  974.82   1-0.22099 0.11877 0.68295-0.26952-0.69622 0.95564
  -1 -10  -8 4983.47  784.86   1 0.14930-0.25150 0.26133-0.67441-0.95363 0.69419
  -1  10  -8 7269.73  993.46   1 0.41241-0.51460-0.16045 0.57356-0.89675 0.63734
   1  10  -8 6120.36  655.65   1 0.49311-0.39092-0.32723 0.74037-0.80607 0.54683
  -1  10   8 6782.81 1051.48   1 0.56345-0.66567 0.70785-0.29498-0.42598 0.68546
   1  10   8 7172.53  931.52   1 0.55513-0.45294 0.55350-0.14052-0.62085 0.88039
   1  10   9  220.10  204.55   1-0.34253 0.44466 0.77844-0.36548-0.52602 0.81773
  -1  10   9  731.08  276.03   1-0.25908 0.15695 0.71599-0.30304-0.64825 0.93996
  -1 -10  -9  375.86  134.97   1 0.10838-0.21058 0.31669-0.72977-0.94231 0.65045
  -1  10  -9   78.67  347.79   1 0.42992-0.53211-0.19425 0.60736-0.88171 0.58988
   1  10  -9    3.91  291.00   1 0.50601-0.40382-0.35722 0.77035-0.78507 0.49343
  -1  10   9  829.59  275.36   1 0.56104-0.66326 0.73305-0.32019-0.38451 0.67642
   1  10   9  826.58  549.88   1 0.56025-0.45806 0.59277-0.17979-0.57856 0.87054
  -1  10  10 2201.61  490.05   1-0.29448 0.19235 0.74412-0.33117-0.59963 0.92375
  -1  10 -10 3119.58  699.30   1 0.44491-0.54710-0.22409 0.63719-0.86708 0.54282
   1  10 -10 2398.26  555.78   1 0.51643-0.41424-0.38241 0.79555-0.76619 0.44214
  -1  10  10 3046.07  584.29   1 0.55756-0.65978 0.75524-0.34237-0.34457 0.66893
   1  10  10 3849.49  646.13   1 0.56338-0.46120 0.62846-0.21548-0.53630 0.86073
  -1  10  11 1052.92  256.68   1-0.32694 0.22481 0.76783-0.35488-0.55093 0.90747
  -1  10 -11 1163.54  403.85   1 0.45768-0.55987-0.25025 0.66335-0.85316 0.49648
   1  10 -11 1439.97  455.25   1 0.52484-0.42264-0.40349 0.81663-0.74948 0.39303
  -1  10  11  641.43  225.79   1 0.55358-0.65580 0.77462-0.36160-0.30577 0.66269
   1  10  11 1593.24  318.75   1 0.56449-0.46227 0.66087-0.24801-0.49455 0.85134
  -1  10  12 3734.36  829.71   1-0.35657 0.25444 0.78752-0.37457-0.50265 0.89160
  -1  10 -12 3898.99  543.90   1 0.46841-0.57060-0.27285 0.68599-0.84032 0.45146
   1  10 -12 5139.81  801.56   1 0.53160-0.42941-0.42102 0.83416-0.73493 0.34607
  -1  10  12 4356.72  718.91   1 0.54848-0.65070 0.79179-0.37877-0.26875 0.65811
   1  10  12 2736.40  487.75   1 0.56432-0.46210 0.69005-0.27719-0.45316 0.84238
  -1  10 -13  779.61  438.63   1 0.47757-0.57976-0.29261 0.70574-0.82843 0.40717
   1  10 -13  649.72  326.93   1 0.53703-0.43484-0.43550 0.84864-0.72244 0.30118
  -1  10  13  527.26  361.33   1 0.54276-0.64497 0.80690-0.39388-0.23306 0.65487
   1  10  13  137.49  236.30   1 0.56281-0.46059 0.71631-0.30345-0.41246 0.83412
  -1  10 -14 4453.67  815.18   1 0.48528-0.58747-0.30959 0.72273-0.81771 0.36404
   1  10 -14 5493.01  893.93   1 0.54136-0.43917-0.44735 0.86049-0.71189 0.25823
  -1  10  14 5388.01  699.41   1 0.53650-0.63872 0.82018-0.40717-0.19861 0.65287
   1  10  14 4601.04  773.52   1 0.56012-0.45790 0.73990-0.32703-0.37256 0.82666
  -1  10 -15 1973.40  583.58   1 0.49172-0.59392-0.32408 0.73722-0.80819 0.32211
   1  10 -15  880.07  408.96   1 0.54492-0.44272-0.45679 0.87008-0.70312 0.21665
  -1 -10 -15  616.33  257.01   1 0.50319-0.60546-0.84476 0.43146 0.18210-0.66877
  -1  10  15 1528.45  569.16   1 0.52980-0.63202 0.83185-0.41883-0.16531 0.65201
   1  10  15 2374.41  702.38   1 0.55640-0.45419 0.76103-0.34816-0.33352 0.82005
  -1  10 -16 1278.50  612.85   1 0.49707-0.59927-0.33631 0.74945-0.79987 0.28139
   1  10 -16  253.64  392.02   1 0.54758-0.44538-0.46434 0.87763-0.69608 0.17718
  -1 -10 -16  514.60  154.80   1 0.51857-0.62083-0.84418 0.43087 0.13579-0.65490
  -1  10  16  473.46  278.10   1 0.52271-0.62492 0.84206-0.42904-0.13306 0.65221
   1  10  16  787.90  209.78   1 0.55220-0.44998 0.77972-0.36670-0.29511 0.81426
  -1  10 -17 2369.57  477.95   1 0.50147-0.60366-0.34652 0.75966-0.79274 0.24186
   1  10 -17 1920.91  623.52   1 0.54958-0.44738-0.47013 0.88343-0.69059 0.13925
  -1 -10 -17 3824.10  505.04   1 0.53187-0.63414-0.84180 0.42849 0.09206-0.64362
  -1  10  17 2182.41  408.37   1 0.51526-0.61748 0.85096-0.43794-0.10178 0.65338
   1  10  17 1732.04  457.27   1 0.54681-0.44460 0.79655-0.38353-0.25786 0.80946
  -1  10 -18  981.83  553.69   1 0.50503-0.60722-0.35489 0.76803-0.78675 0.20347
   1  10 -18  -18.75  365.18   1 0.55104-0.44884-0.47439 0.88768-0.68651 0.10274
  -1 -10 -18  132.69  281.00   1 0.54339-0.64566-0.83794 0.42463 0.05066-0.63466
   1  10  18  698.93  235.80   1 0.54074-0.43852 0.81150-0.39848-0.22150 0.80554
  -1  10 -19 2149.80  478.11   1 0.50785-0.61004-0.36160 0.77474-0.78187 0.16618
   1  10 -19  723.65  338.75   1 0.55202-0.44981-0.47727 0.89056-0.68372 0.06752
  -1 -10 -19 1470.02  321.95   1 0.55338-0.65565-0.83284 0.41954 0.01132-0.62777
   1 -10 -19 1240.11  360.53   1 0.49909-0.39682-0.84459 0.43128 0.19380-0.81025
   1  10  19  737.18  336.12   1 0.53404-0.43183 0.82473-0.41172-0.18600 0.80250
  -1  10 -20  818.24  467.03   1 0.51002-0.61221-0.36680 0.77994-0.77803 0.12993
   1  10 -20 -157.06  363.49   1 0.55257-0.45037-0.47891 0.89221-0.68212 0.03349
  -1 -10 -20  607.91  232.39   1 0.56204-0.66430-0.82669 0.41338-0.02615-0.62273
   1 -10 -20  368.20  326.21   1 0.51247-0.41021-0.84466 0.43135 0.15463-0.80352
   1  10  20  456.92  330.55   1 0.52680-0.42459 0.83639-0.42338-0.15135 0.80029
  -1  10 -21  518.08  422.99   1 0.51160-0.61380-0.37062 0.78376-0.77517 0.09467
   1  10 -21  705.74  482.33   1 0.55275-0.45055-0.47945 0.89274-0.68160 0.00053
  -1 -10 -21  228.95  239.40   1 0.56955-0.67180-0.81962 0.40611-0.06177-0.61947
   1 -10 -21  216.95  330.19   1 0.52455-0.42228-0.84335 0.43004 0.11661-0.79795
   1  10  21  247.23  218.02   1 0.51907-0.41685 0.84661-0.43359-0.11750 0.79888
  -1  10 -22  616.70  484.85   1 0.51266-0.61485-0.37318 0.78632-0.77324 0.06033
   1  10 -22  819.88  485.50   1 0.55259-0.45039-0.47898 0.89227-0.68206-0.03143
  -1 -10 -22  477.99  312.20   1 0.57600-0.67824-0.81176 0.39826-0.09614-0.61754
   1 -10 -22   79.66  323.32   1 0.53542-0.43315-0.84081 0.42750 0.07969-0.79348
   1  10  22  535.34  405.95   1 0.51089-0.40868 0.85548-0.44246-0.08441 0.79824
  -1  11   0 9809.79 1258.64   1 0.14247-0.24467 0.27073 0.18365-0.95205 0.95205
   1  11   0 9357.05  651.14   1 0.19658-0.09439 0.19447 0.25991-0.96100 0.96100
  -1 -11   010770.15  845.74   1 0.50381-0.60600-0.35200-0.10244-0.78883 0.78883
  -1  11   011221.20 1631.71   1 0.50869-0.61093 0.35314 0.10120-0.78518 0.78518
   1  11   0 9891.48 1503.29   1 0.43223-0.33002 0.14131 0.31285-0.89062 0.89062
  -1  11   1  670.02  296.09   1 0.09896-0.20115 0.32912 0.12526-0.93908 0.97151
   1  11   1   41.08  161.64   1 0.13815-0.03596 0.27664 0.17774-0.95098 0.98341
  -1  11  -1  983.69  297.92   1 0.18391-0.28610 0.21271 0.24167-0.95964 0.92722
   1  11  -1  525.90  188.43   1 0.24987-0.14768 0.11502 0.33936-0.96142 0.92898
  -1 -11  -1  438.46  247.11   1 0.47519-0.57738-0.28743-0.16702-0.83161 0.79920
  -1 -11   1  322.08  106.76   1 0.52798-0.63017-0.41156-0.04288-0.74286 0.77526
  -1  11   1  457.38  184.32   1 0.52517-0.62741 0.41120 0.04314-0.74505 0.77749
  -1  11  -1  554.36  353.92   1 0.48884-0.59108 0.29112 0.16322-0.82235 0.78992
   1  11   1  338.17  267.16   1 0.45536-0.35316 0.19918 0.25499-0.86773 0.90014
   1  11  -1 1016.57  353.53   1 0.40734-0.30514 0.08318 0.37098-0.90947 0.87707
  -1  11   2 5986.76  876.91   1 0.05399-0.15618 0.38685 0.06753-0.92055 0.98541
   1  11   2 5336.54  505.36   1 0.07593 0.02626 0.35901 0.09537-0.93023 0.99509
  -1  11  -2 5835.25  971.99   1 0.22272-0.32491 0.15602 0.29836-0.96231 0.89744
   1  11  -2 4808.75  794.86   1 0.29736-0.19517 0.04026 0.41413-0.95391 0.88904
  -1 -11  -2 3944.50  530.71   1 0.44219-0.54438-0.21862-0.23579-0.86986 0.80501
  -1  11   2 6894.25 1206.64   1 0.53824-0.64043 0.46476-0.01048-0.70305 0.76793
   1  11   2 5100.41  690.55   1 0.47668-0.37444 0.25611 0.19823-0.84093 0.90581
  -1  11  -2 4958.36  689.73   1 0.46545-0.56766 0.22583 0.22833-0.85577 0.79096
   1  11  -2 5648.21  941.27   1 0.38110-0.27890 0.02556 0.42860-0.92417 0.85936
   1  11   3 8261.88 1169.48   1 0.01160 0.09060 0.43882 0.01565-0.89849 0.99576
  -1  11   3 6368.84 1096.39   1 0.00823-0.11044 0.44286 0.01161-0.89655 0.99381
  -1  11  -3 7047.22 1190.44   1 0.25861-0.36080 0.10155 0.35283-0.96062 0.86332
   1  11  -3 7672.82  855.69   1 0.33879-0.23660-0.02847 0.48286-0.94043 0.84312
  -1 -11  -3 5829.50  540.14   1 0.40535-0.50753-0.14711-0.30729-0.90224 0.80496
  -1  11   3 6670.77 1076.76   1 0.54841-0.65059 0.51377-0.05949-0.65975 0.75708
   1  11   3 7124.94  812.41   1 0.49553-0.39329 0.31127 0.14308-0.81089 0.90821
  -1  11  -3 5727.19  614.47   1 0.43930-0.54151 0.15858 0.29558-0.88422 0.78701
   1  11  -3 6165.25  583.67   1 0.35379-0.25155-0.03070 0.48502-0.93481 0.83753
   1  11   4 5372.19  732.32   1-0.05273 0.15494 0.51349-0.05901-0.85647 0.98615
  -1  11   4 5567.65  811.15   1-0.03751-0.06469 0.49629-0.04181-0.86734 0.99702
  -1  11  -4 4840.57  563.92   1 0.29134-0.39353 0.04997 0.40441-0.95531 0.82557
   1  11  -4 5437.95  937.95   1 0.37439-0.27220-0.09039 0.54480-0.92285 0.79315
  -1 -11  -4 3893.06  852.85   1 0.36549-0.46767-0.07457-0.37984-0.92782 0.79811
  -1  11   4 5291.77  970.31   1 0.55582-0.65801 0.55817-0.10389-0.61603 0.74580
   1  11   4 5892.94  574.23   1 0.51198-0.40974 0.36416 0.09018-0.77797 0.90773
  -1  11  -4 5248.68  433.25   1 0.41058-0.51278 0.09053 0.36363-0.90731 0.77769
   1  11  -4 6043.19  791.55   1 0.32618-0.22394-0.08501 0.53933-0.94147 0.81176
   1  11   5 6086.64  880.75   1-0.11527 0.21749 0.58094-0.12617-0.80573 0.96787
  -1  11   5 5464.84 1152.20   1-0.08259-0.01961 0.54635-0.09188-0.83346 0.99557
  -1 -11  -5 5540.87  997.29   1 0.32349-0.42568-0.00267-0.45171-0.94622 0.78405
  -1  11  -5 6312.47  852.82   1 0.32084-0.42303 0.00175 0.45263-0.94713 0.78496
   1  11  -5 4791.14 1142.40   1 0.40447-0.30229-0.14547 0.59989-0.90290 0.74077
  -1  11   5 4631.21  814.97   1 0.56082-0.66301 0.59815-0.14387-0.57243 0.73465
   1  11   5 6194.39 1048.41   1 0.52600-0.42376 0.41438 0.03997-0.74270 0.90488
  -1  11  -5 4967.16  740.50   1 0.37994-0.48215 0.02309 0.43107-0.92471 0.76269
   1  11  -5 5303.45  812.85   1 0.29861-0.19637-0.13668 0.59100-0.94453 0.78239
   1  11   6 4634.83  692.66   1-0.17431 0.27653 0.63987-0.18510-0.74844 0.94300
  -1  11   6 4243.56  848.19   1-0.12643 0.02421 0.59245-0.13768-0.79562 0.99018
  -1 -11  -6 4190.07  714.91   1 0.28100-0.38319 0.06647-0.52086-0.95740 0.76279
  -1  11  -6 4225.22  661.89   1 0.34719-0.44938-0.04267 0.49708-0.93682 0.74226
   1  11  -6 4643.97  449.84   1 0.42972-0.32753-0.19386 0.64828-0.88190 0.68734
  -1  11   6 6805.07  948.88   1 0.56372-0.66591 0.63398-0.17971-0.52940 0.72405
   1  11   6 6522.53 1113.31   1 0.53756-0.43537 0.46174-0.00746-0.70556 0.90021
  -1  11  -6 5267.47  742.16   1 0.34793-0.45017-0.04246 0.49678-0.93655 0.74199
   1  11  -6 5545.17  849.47   1 0.27152-0.16929-0.18523 0.63955-0.94443 0.74987
   1  11   7 5616.51 1156.66   1-0.22875 0.33097 0.68979-0.23502-0.68691 0.91390
  -1  11   7 5975.61  927.09   1-0.16847 0.06624 0.63425-0.17948-0.75454 0.98152
  -1 -11  -7 5581.52  510.20   1 0.23903-0.34122 0.13153-0.58592-0.96206 0.73502
  -1  11  -7 5536.63 1005.08   1 0.37046-0.47265-0.08339 0.53780-0.92509 0.69811
   1  11  -7 5775.31 1087.18   1 0.45076-0.34858-0.23598 0.69040-0.86088 0.63390
  -1  11   7 5296.05  565.13   1 0.56456-0.66678 0.66608-0.21193-0.48743 0.71448
   1  11   7 4979.14  697.01   1 0.54690-0.44471 0.50585-0.05157-0.66708 0.89418
  -1  11  -7 5433.61  606.47   1 0.31581-0.41805-0.10472 0.55904-0.94302 0.71603
   1  11   8  308.73  180.43   1-0.27751 0.37964 0.73092-0.27667-0.62349 0.88279
  -1  11   8  495.61  229.88   1-0.20834 0.10612 0.67160-0.21683-0.71101 0.97042
  -1 -11  -8  438.77  183.42   1 0.19874-0.30093 0.19134-0.64573-0.96119 0.70175
  -1  11  -8 1327.20  544.48   1 0.39089-0.49308-0.12028 0.57470-0.91254 0.65313
   1  11  -8  305.16  309.27   1 0.46809-0.36590-0.27218 0.72663-0.84071 0.58147
  -1  11   8  324.29  294.05   1 0.56416-0.66637 0.69466-0.24051-0.44627 0.70575
   1  11   8  340.94  284.49   1 0.55409-0.45190 0.54676-0.09248-0.62771 0.88725
  -1  11  -8  -96.35  204.70   1 0.28416-0.38640-0.16283 0.61715-0.94484 0.68542
   1  11   924994.83  916.44   1-0.32135 0.42348 0.76390-0.30965-0.55961 0.85133
  -1  11   923716.23 1475.69   1-0.24582 0.14359 0.70450-0.24973-0.66577 0.95760
  -1  11  -925719.50 3137.26   1 0.40872-0.51090-0.15346 0.60787-0.89966 0.60783
   1  11  -924608.51  817.73   1 0.48252-0.38033-0.30348 0.75793-0.82162 0.52998
  -1  11   919696.40 2622.79   1 0.56247-0.66468 0.72012-0.26597-0.40625 0.69817
   1  11   923702.90 3042.69   1 0.55931-0.45712 0.58447-0.13020-0.58784 0.87982
  -1  11  -923217.72  636.51   1 0.25365-0.35589-0.21617 0.67049-0.94282 0.65098
   1  11  10 1309.68  360.10   1-0.36000 0.46213 0.78967-0.33542-0.49679 0.82092
  -1  11  10 1553.06  347.34   1-0.28041 0.17828 0.73322-0.27897-0.61947 0.94360
  -1  11 -10 1863.60  497.63   1 0.42419-0.52637-0.18307 0.63748-0.88687 0.56261
   1  11 -10 2234.59  486.22   1 0.49443-0.39224-0.33025 0.78470-0.80403 0.47998
  -1  11  10  876.99  339.11   1 0.55969-0.66191 0.74279-0.28863-0.36742 0.69178
   1  11  10 3160.85  516.81   1 0.56271-0.46053 0.61909-0.16481-0.54778 0.87220
  -1  11  11  397.94  294.14   1-0.31276 0.21063 0.75773-0.30348-0.57272 0.92926
  -1  11 -11  555.82  363.22   1 0.43755-0.53973-0.20933 0.66374-0.87448 0.51780
   1  11 -11 1131.36  480.45   1 0.50424-0.40205-0.35303 0.80748-0.78810 0.43164
  -1  11  11  647.50  394.84   1 0.55599-0.65821 0.76295-0.30880-0.32979 0.68658
   1  11  11  629.77  324.21   1 0.56422-0.46200 0.65083-0.19668-0.50800 0.86479
  -1  11  12 3168.79  666.40   1-0.34256 0.24043 0.77846-0.32421-0.52596 0.91491
  -1  11 -12 2951.46  775.67   1 0.44904-0.55123-0.23247 0.68689-0.86273 0.47362
   1  11 -12 3184.96  868.67   1 0.51230-0.41011-0.37231 0.82677-0.77390 0.38504
  -1  11  12 2178.10  442.85   1 0.55191-0.65413 0.78074-0.32642-0.29295 0.68231
   1  11  12 4122.17  489.33   1 0.56455-0.46233 0.67967-0.22552-0.46832 0.85754
  -1  11  13  282.97  171.03   1-0.36992 0.26778 0.79571-0.34147-0.47957 0.90093
  -1  11 -13  450.55  344.42   1 0.45877-0.56097-0.25255 0.70700-0.85190 0.43064
   1  11 -13  308.94  247.39   1 0.51890-0.41671-0.38854 0.84299-0.76142 0.34016
  -1  11  13  332.29  232.16   1 0.54677-0.64899 0.79666-0.34234-0.25760 0.67941
   1  11  13  472.45  280.78   1 0.56358-0.46136 0.70586-0.25171-0.42909 0.85075
  -1  11 -14 2999.90  497.42   1 0.46716-0.56935-0.27020 0.72465-0.84186 0.38820
   1  11 -14 2773.26  757.63   1 0.52428-0.42209-0.40208 0.85653-0.75063 0.29697
  -1  11  14 2142.27  318.96   1 0.54106-0.64328 0.81078-0.35646-0.22332 0.67758
   1  11  14 2906.20  532.23   1 0.56146-0.45925 0.72960-0.27545-0.39042 0.84451
  -1  11 -15 1297.43  313.54   1 0.47427-0.57646-0.28544 0.73990-0.83281 0.34674
   1  11 -15 3602.09  939.00   1 0.52863-0.42644-0.41326 0.86771-0.74145 0.25538
  -1  11  15  803.85  442.54   1 0.53484-0.63706 0.82329-0.36897-0.19005 0.67675
   1  11  15 1072.60  332.30   1 0.55833-0.45611 0.75104-0.29689-0.35240 0.83893
  -1  11 -16  805.08  404.72   1 0.48026-0.58245-0.29849 0.75294-0.82477 0.30629
   1  11 -16  250.73  247.74   1 0.53211-0.42991-0.42236 0.87681-0.73380 0.21532
  -1 -11 -16  434.16  187.37   1 0.50690-0.60916-0.84481 0.39017 0.17130-0.69041
  -1  11  16  328.60  224.96   1 0.52819-0.63040 0.83434-0.38002-0.15772 0.67687
   1  11  16 1056.02  266.65   1 0.55429-0.45207 0.77037-0.31622-0.31507 0.83404
  -1  11 -17  750.22  234.90   1 0.48525-0.58745-0.30954 0.76399-0.81774 0.26686
   1  11 -17  682.83  378.98   1 0.53484-0.43265-0.42962 0.88407-0.72757 0.17669
  -1 -11 -17  865.27  316.93   1 0.52159-0.62386-0.84380 0.38917 0.12618-0.67774
  -1  11  17  618.98  278.22   1 0.52114-0.62335 0.84407-0.38975-0.12627 0.67787
   1  11  17   95.09  355.96   1 0.54986-0.44764 0.78756-0.33324-0.27819 0.82979
  -1  11 -18  211.19  198.49   1 0.48937-0.59156-0.31876 0.77321-0.81172 0.22844
   1  11 -18  208.14  430.10   1 0.53693-0.43474-0.43524 0.88970-0.72267 0.13938
  -1 -11 -18  373.37  179.67   1 0.53440-0.63666-0.84111 0.38647 0.08329-0.66729
  -1  11  18 1799.32 1066.93   1 0.51374-0.61595 0.85259-0.39827-0.09563 0.67968
   1  11  18  937.96  414.22   1 0.54431-0.44210 0.80311-0.34879-0.24232 0.82636
  -1  11 -19  816.35  486.57   1 0.49271-0.59490-0.32632 0.78077-0.80668 0.19099
   1  11 -19 1372.14  515.86   1 0.53847-0.43627-0.43940 0.89386-0.71900 0.10331
  -1 -11 -19  360.84  269.96   1 0.54556-0.64783-0.83699 0.38235 0.04242-0.65887
   1  11  19   41.57  137.86   1 0.53813-0.43591 0.81700-0.36268-0.20718 0.82367
  -1  11 -20  372.51  359.78   1 0.49535-0.59754-0.33235 0.78680-0.80259 0.15450
   1  11 -20  508.90  319.90   1 0.53951-0.43731-0.44225 0.89670-0.71647 0.06838
  -1 -11 -20  618.30  133.51   1 0.55528-0.65755-0.83165 0.37701 0.00339-0.65228
   1 -11 -20  967.89  386.51   1 0.50407-0.40180-0.84478 0.39015 0.17955-0.82845
   1  11  20  561.13  288.68   1 0.53136-0.42914 0.82934-0.37502-0.17276 0.82170
   1  11 -21  860.36  395.91   1 0.54011-0.43791-0.44390 0.89835-0.71500 0.03450
  -1 -11 -21  909.73  428.58   1 0.56374-0.66600-0.82525 0.37061-0.03397-0.64736
   1 -11 -21  743.17  455.93   1 0.51692-0.41465-0.84434 0.38970 0.14096-0.82230
   1  11  21  526.20  314.15   1 0.52407-0.42185 0.84024-0.38592-0.13903 0.82042
  -1  11 -22 1165.82  519.86   1 0.49881-0.60101-0.34034 0.79479-0.79708 0.08418
   1  11 -22  518.20  262.36   1 0.54031-0.43812-0.44446 0.89891-0.71450 0.00159
  -1 -11 -22  751.65  317.28   1 0.57109-0.67334-0.81792 0.36306-0.06964-0.64404
   1 -11 -22   18.92  230.35   1 0.52854-0.42627-0.84258 0.38795 0.10339-0.81718
   1  11  22  954.74  262.84   1 0.51630-0.41408 0.84982-0.39550-0.10599 0.81982
  -1  12   0  655.10  288.63   1 0.13163-0.23382 0.28552 0.21017-0.94928 0.94928
   1  12   0  512.22  184.75   1 0.17755-0.07536 0.22177 0.27391-0.95879 0.95879
  -1  12   0  905.89  300.90   1 0.51192-0.61416 0.36397 0.13168-0.77810 0.77810
   1  12   0  505.37  257.43   1 0.44268-0.34048 0.16695 0.32850-0.88099 0.88099
  -1  12   1 8135.65 1030.32   1 0.09105-0.19325 0.33946 0.15623-0.93620 0.96863
   1  12   1 6825.82 1010.62   1 0.12399-0.02180 0.29584 0.19985-0.94715 0.97958
  -1  12  -1 7646.86 1130.90   1 0.17039-0.27258 0.23191 0.26378-0.95769 0.92526
   1  12  -1 8689.31 1402.65   1 0.22697-0.12478 0.14968 0.34601-0.96232 0.92989
  -1  12   1 8845.95 1089.32   1 0.52657-0.62881 0.41655 0.07910-0.74108 0.77351
  -1  12  -110454.13 1124.81   1 0.49455-0.59679 0.30826 0.18739-0.81264 0.78020
   1  12   1 8816.33 1240.30   1 0.46324-0.36104 0.21991 0.27553-0.85850 0.89091
   1  12  -1 7915.63 1311.03   1 0.42061-0.31840 0.11369 0.38176-0.90008 0.86768
  -1  12   2 8100.93 1619.39   1 0.04915-0.15135 0.39291 0.10278-0.91826 0.98312
   1  12   2 6459.52  891.87   1 0.06735 0.03484 0.36998 0.12571-0.92659 0.99145
  -1  12  -2 7268.28 1271.65   1 0.20688-0.30907 0.17941 0.31628-0.96177 0.89690
   1  12  -2 8377.14  666.90   1 0.27172-0.16953 0.08111 0.41457-0.95894 0.89408
  -1 -12  -2 8361.54  436.15   1 0.45484-0.55702-0.24436-0.25136-0.85639 0.79153
  -1  12   2 8809.30 1263.42   1 0.53842-0.64061 0.46555 0.03001-0.70238 0.76727
   1  12   210496.24 1722.49   1 0.48232-0.38008 0.27211 0.22354-0.83265 0.89753
  -1  12  -2 8511.60  994.99   1 0.47450-0.57674 0.25002 0.24563-0.84399 0.77912
   1  12  -2 8736.75 1335.88   1 0.39732-0.29512 0.06077 0.43468-0.91566 0.85085
   1  12   3 1696.86  345.16   1 0.00887 0.09334 0.44210 0.05369-0.89692 0.99418
  -1  12   3  860.90  362.05   1 0.00645-0.10867 0.44498 0.05080-0.89551 0.99277
  -1  12  -3 1910.21  401.77   1 0.24086-0.34305 0.12875 0.36694-0.96197 0.86467
   1  12  -3 1189.51  371.98   1 0.31149-0.20930 0.01722 0.47847-0.95009 0.85279
  -1 -12  -3  836.42  191.84   1 0.42308-0.52527-0.18092-0.31479-0.88784 0.79056
  -1  12   3 1176.11  355.48   1 0.54787-0.65006 0.51094-0.01536-0.66239 0.75972
   1  12   3 1641.98  408.35   1 0.49926-0.39702 0.32280 0.17285-0.80407 0.90138
  -1  12  -3  700.62  353.20   1 0.45179-0.55400 0.18997 0.30548-0.87165 0.77444
   1  12  -3 1293.50  451.19   1 0.37303-0.27080 0.00884 0.48677-0.92777 0.83049
   1  12   414286.29 1298.74   1-0.04984 0.15205 0.51024-0.01445-0.85858 0.98826
  -1  12   412609.08 1835.66   1-0.03635-0.06585 0.49497 0.00081-0.86814 0.99782
  -1  12  -412273.93 1128.09   1 0.27212-0.37431 0.08049 0.41520-0.95888 0.82915
   1  12  -412719.26  646.40   1 0.34636-0.24418-0.04124 0.53697-0.93719 0.80748
  -1 -12  -410353.03 1558.97   1 0.38875-0.49094-0.11636-0.37936-0.91396 0.78425
  -1  12   411535.52 1835.19   1 0.55499-0.65718 0.55257-0.05700-0.62180 0.75157
   1  12   412322.68 2153.42   1 0.51417-0.41193 0.37164 0.12401-0.77298 0.90273
  -1  12  -413243.44 1838.40   1 0.42719-0.52939 0.12923 0.36622-0.89487 0.76525
   1  12  -413149.72 2049.42   1 0.34836-0.24612-0.04160 0.53723-0.93643 0.80672
   1  12   5 3066.08  313.16   1-0.10738 0.20959 0.57277-0.07698-0.81264 0.97475
  -1  12   5 2714.82  517.17   1-0.07876-0.02344 0.54221-0.04642-0.83654 0.99864
  -1  12  -5 2962.17  490.14   1 0.30057-0.40276 0.03505 0.46063-0.95311 0.79094
   1  12  -5 3248.99  464.86   1 0.37647-0.27428-0.09411 0.58984-0.92163 0.75950
  -1  12   5 3355.35  622.21   1 0.56000-0.66219 0.59054-0.09496-0.58107 0.74328
   1  12   5 4453.43  759.00   1 0.52702-0.42478 0.41827 0.07738-0.73979 0.90198
  -1  12  -5 2499.45  451.03   1 0.40090-0.50311 0.06872 0.42673-0.91353 0.75151
   1  12  -5 2915.17  534.59   1 0.32357-0.22133-0.09000 0.58562-0.94191 0.77977
   1  12   6 5191.89  585.10   1-0.16255 0.26477 0.62852-0.13240-0.76061 0.95517
  -1  12   6 4702.27  723.32   1-0.12030 0.01808 0.58615-0.09004-0.80121 0.99577
  -1  12  -6 4416.92  635.91   1 0.32623-0.42842-0.00725 0.50295-0.94526 0.75065
   1  12  -6 3823.82  737.61   1 0.40227-0.30008-0.14134 0.63707-0.90454 0.70998
  -1  12   6 4235.36  762.55   1 0.56315-0.66534 0.62500-0.12942-0.54057 0.73523
   1  12   6 4232.73  845.65   1 0.53774-0.43555 0.46254 0.03303-0.70490 0.89955
  -1  12  -6 3995.48  551.48   1 0.37329-0.47552 0.00937 0.48624-0.92766 0.73310
   1  12  -6 3585.30  574.55   1 0.29902-0.19679-0.13592 0.63154-0.94451 0.74994
   1  12   7 1504.22  309.04   1-0.21417 0.31639 0.67686-0.18075-0.70426 0.93124
  -1  12   7 2087.76  404.39   1-0.16042 0.05820 0.62644-0.13033-0.76277 0.98976
  -1  12  -7 1268.42  350.42   1 0.34923-0.45141-0.04617 0.54190-0.93589 0.70891
   1  12  -7 2791.51  486.89   1 0.42423-0.32204-0.18314 0.67887-0.88683 0.65985
  -1  12   7 1538.24  275.27   1 0.56438-0.66660 0.65624-0.16080-0.50081 0.72786
  -1  12  -7 2126.27  506.70   1 0.34530-0.44754-0.04770 0.54332-0.93727 0.71028
   1  12  -7 1200.66  384.22   1 0.27505-0.17281-0.17902 0.67465-0.94461 0.71761
   1  12   8 4081.94  647.13   1-0.26118 0.36331 0.71772-0.22218-0.64548 0.90478
  -1  12   8 4228.86  659.14   1-0.19881 0.09658 0.66288-0.16677-0.72184 0.98125
  -1  12  -8 4642.10  742.15   1 0.36961-0.47180-0.08187 0.57760-0.92556 0.66616
   1  12  -8 3487.12  774.66   1 0.44281-0.34063-0.21986 0.71559-0.86923 0.60982
  -1  12   8 3277.36  603.67   1 0.56447-0.66669 0.68438-0.18894-0.46150 0.72098
   1  12   8 3765.80  730.44   1 0.55348-0.45129 0.54292-0.04734-0.63157 0.89111
  -1  12  -8 3891.07  666.19   1 0.31737-0.41961-0.10177 0.59739-0.94282 0.68340
   1  12  -8 4850.12  623.03   1 0.25193-0.14970-0.21910 0.71472-0.94261 0.68319
   1  12   9 9473.52  616.88   1-0.30425 0.40638 0.75148-0.25593-0.58541 0.87712
  -1  12   9 7716.45 1158.91   1-0.23520 0.13297 0.69540-0.19929-0.67903 0.97087
  -1  12  -9 7512.80 1257.54   1 0.38761-0.48980-0.11428 0.61001-0.91470 0.62287
   1  12  -9 8322.09 1187.20   1 0.45837-0.35617-0.25171 0.74747-0.85237 0.56072
  -1  12   9 7551.59 1298.33   1 0.56332-0.66554 0.70973-0.21429-0.42301 0.71493
   1  12   9 8430.88  973.86   1 0.55864-0.45645 0.57902-0.08344-0.59384 0.88582
  -1  12  -9 7534.95  936.68   1 0.29006-0.39229-0.15224 0.64786-0.94482 0.65297
   1  12  10 3922.59  870.58   1-0.34286 0.44500 0.77866-0.28312-0.52547 0.84959
  -1  12  10 4659.24  753.95   1-0.26907 0.16694 0.72416-0.22861-0.63496 0.95909
  -1  12 -10 4956.29  772.31   1 0.40342-0.50561-0.14350 0.63923-0.90368 0.57943
   1  12 -10 5435.57  683.34   1 0.47154-0.36934-0.27955 0.77531-0.83636 0.51231
  -1  12  10 4295.13  551.94   1 0.56111-0.66333 0.73253-0.23709-0.38542 0.70977
   1  12  10 4981.28  620.68   1 0.56217-0.45998 0.61242-0.11685-0.55577 0.88020
  -1  12 -10 4541.54  561.27   1 0.26380-0.36604-0.19870 0.69433-0.94388 0.61961
   1  12  11 5146.01 1125.36   1-0.37721 0.47934 0.80000-0.30446-0.46658 0.82312
  -1  12  11 5264.50  770.45   1-0.30105 0.19891 0.74909-0.25354-0.59011 0.94664
  -1  12 -11 5203.47 1000.83   1 0.41724-0.51942-0.16967 0.66540-0.89281 0.53613
   1  12 -11 5941.51 1275.66   1 0.48258-0.38038-0.30360 0.79936-0.82154 0.46509
  -1  12  11 6497.34  924.67   1 0.55798-0.66019 0.75301-0.25757-0.34875 0.70554
   1  12  11 7181.22  952.90   1 0.56392-0.46171 0.64330-0.14786-0.51783 0.87461
  -1  12  12 5953.39 1081.69   1-0.33076 0.22863 0.77048-0.27494-0.54493 0.93388
  -1  12 -12 8236.88  664.22   1 0.42926-0.53145-0.19296 0.68869-0.88232 0.49321
   1  12 -12 6667.66  757.88   1 0.49181-0.38961-0.32427 0.82003-0.80806 0.41920
  -1  12  12 7431.90 1574.08   1 0.55404-0.65626 0.77138-0.27595-0.31303 0.70226
   1  12  12 6341.79 1031.68   1 0.56459-0.46238 0.67159-0.17615-0.47978 0.86900
  -1  12  13  489.74  336.48   1-0.35825 0.25612 0.78858-0.29303-0.49979 0.92115
  -1  12 -13  811.85  393.34   1 0.43968-0.54186-0.21357 0.70930-0.87239 0.45085
   1  12 -13  539.54  208.62   1 0.49950-0.39730-0.34192 0.83769-0.79597 0.37471
  -1  12  13  109.56  204.31   1 0.54981-0.65203 0.78771-0.29209-0.27785 0.69966
   1  12  13  659.48  561.08   1 0.56403-0.46182 0.69749-0.20205-0.44199 0.86364
  -1  12 -14  536.75  205.95   1 0.44866-0.55084-0.23168 0.72741-0.86314 0.40918
   1  12 -14  676.70  373.11   1 0.50588-0.40369-0.35690 0.85267-0.78530 0.33163
  -1  12  14  414.52  168.24   1 0.54458-0.64680 0.80243-0.30681-0.24395 0.69821
   1  12  14  531.86  309.60   1 0.56237-0.46015 0.72114-0.22571-0.40457 0.85866
  -1  12 -15 2643.27  753.97   1 0.45636-0.55854-0.24749 0.74322-0.85468 0.36829
   1  12 -15 3169.19  746.92   1 0.51114-0.40895-0.36950 0.86527-0.77601 0.28994
  -1  12  15 3715.69  981.20   1 0.53882-0.64104 0.81558-0.31996-0.21092 0.69763
   1  12  15 3040.61  593.55   1 0.55971-0.45749 0.74268-0.24724-0.36761 0.85414
  -1  12 -16  847.62  274.05   1 0.46282-0.56501-0.26102 0.75678-0.84714 0.32867
   1  12 -16  223.11  381.13   1 0.51544-0.41324-0.37997 0.87574-0.76807 0.24959
  -1 -12 -16  520.70  280.81   1 0.49600-0.59827-0.84438 0.34841 0.20246-0.72157
  -1  12  16  485.01  406.10   1 0.53258-0.63479 0.82729-0.33167-0.17871 0.69787
   1  12  16  857.05  313.28   1 0.55615-0.45393 0.76223-0.26680-0.33118 0.85015
  -1  12 -17 2398.98  413.29   1 0.46837-0.57056-0.27277 0.76853-0.84037 0.28948
   1  12 -17 1500.47  570.70   1 0.51891-0.41671-0.38855 0.88431-0.76141 0.21053
  -1  12  17 1657.88  486.60   1 0.52591-0.62813 0.83768-0.34206-0.14728 0.69888
   1  12  17  822.98  213.72   1 0.55219-0.44997 0.77976-0.28414-0.29503 0.84662
  -1  12 -18  769.86  359.17   1 0.47301-0.57520-0.28272 0.77849-0.83446 0.25117
   1  12 -18  637.62  290.58   1 0.52165-0.41946-0.39542 0.89119-0.75598 0.17269
  -1 -12 -18  727.44  272.67   1 0.52583-0.62810-0.84312 0.34715 0.11239-0.69639
  -1  12  18  484.53  313.26   1 0.51885-0.62107 0.84687-0.35125-0.11658 0.70063
   1  12  18  478.85  285.96   1 0.54711-0.44489 0.79573-0.30011-0.25975 0.84380
  -1  12 -19 1086.76  474.61   1 0.47684-0.57903-0.29102 0.78678-0.82941 0.21372
   1  12 -19  483.37  352.72   1 0.52376-0.42157-0.40076 0.89653-0.75169 0.13600
  -1 -12 -19  536.68  248.01   1 0.53805-0.64032-0.83997 0.34400 0.07031-0.68676
  -1  12  19  366.64  271.83   1 0.51145-0.61366 0.85493-0.35931-0.08657 0.70306
   1  12  19  671.87  245.59   1 0.54137-0.43915 0.81009-0.31447-0.22508 0.84157
  -1  12 -20  816.71  406.81   1 0.47994-0.58213-0.29779 0.79356-0.82520 0.17711
   1  12 -20 3582.17  749.95   1 0.52532-0.42312-0.40472 0.90049-0.74848 0.10039
  -1 -12 -20  830.56  350.58   1 0.54875-0.65102-0.83544 0.33947 0.03002-0.67891
   1 -12 -20 1823.04  554.19   1 0.49632-0.39405-0.84441 0.34844 0.20158-0.85047
   1  12  20 1077.03  395.58   1 0.53503-0.43281 0.82295-0.32732-0.19101 0.83995
  -1  12 -21  436.06  476.55   1 0.48238-0.58457-0.30316 0.79893-0.82182 0.14132
   1  12 -21  100.36  358.48   1 0.52637-0.42417-0.40741 0.90318-0.74628 0.06578
  -1 -12 -21  281.32  358.26   1 0.55810-0.66037-0.82972 0.33375-0.00864-0.67269
   1 -12 -21  842.88  475.03   1 0.50983-0.40756-0.84476 0.34879 0.16259-0.84393
   1  12  21 1040.36  311.29   1 0.52815-0.42593 0.83440-0.33878-0.15754 0.83893
  -1  13   0 2050.92  413.63   1 0.12009-0.22229 0.30108 0.23592-0.94600 0.94600
   1  13   0 1677.44  327.57   1 0.15893-0.05674 0.24798 0.28902-0.95563 0.95563
  -1  13   0 1836.42  357.39   1 0.51554-0.61778 0.37637 0.16058-0.76977 0.76977
   1  13   0 2375.39  472.85   1 0.45255-0.35035 0.19193 0.34481-0.87083 0.87083
  -1  13   1 3367.60  969.07   1 0.08204-0.18424 0.35114 0.18586-0.93271 0.96514
   1  13   1 4407.90  625.25   1 0.10943-0.00723 0.31530 0.22169-0.94265 0.97508
  -1  13  -1 3523.03  390.71   1 0.15654-0.25873 0.25131 0.28569-0.95516 0.92273
   1  13  -1 3265.97  791.90   1 0.20504-0.10285 0.18210 0.35490-0.96166 0.92922
  -1  13   1 5365.07  749.42   1 0.52856-0.63080 0.42425 0.11270-0.73527 0.76770
  -1  13  -1 4346.61  462.67   1 0.50027-0.60252 0.32599 0.21096-0.80215 0.76971
   1  13   1 3525.05  489.36   1 0.47113-0.36889 0.24074 0.29621-0.84856 0.88100
   1  13  -1 3494.14  509.14   1 0.43289-0.33068 0.14291 0.39382-0.89004 0.85763
   1  13   2 4873.97 1045.07   1 0.05738 0.04481 0.38259 0.15440-0.92213 0.98699
  -1  13   2 7160.07 1208.73   1 0.04274-0.14495 0.40081 0.13629-0.91516 0.98000
  -1  13  -2 6936.84 1619.89   1 0.19103-0.29322 0.20249 0.33451-0.96046 0.89561
   1  13  -2 6575.93  754.25   1 0.24732-0.14513 0.11892 0.41808-0.96160 0.89673
  -1  13   2 6045.62 1079.34   1 0.53925-0.64144 0.46923 0.06763-0.69929 0.76418
  -1  13  -2 6668.58  748.80   1 0.48282-0.58506 0.27355 0.26340-0.83189 0.76701
   1  13   2 6737.74  847.02   1 0.48803-0.38579 0.28872 0.24823-0.82368 0.88856
   1  13  -2 5480.33  581.00   1 0.41215-0.30994 0.09411 0.44263-0.90624 0.84143
   1  13   3  700.60  269.83   1 0.00371 0.09849 0.44825 0.08885-0.89389 0.99116
  -1  13   3  227.78  223.31   1 0.00276-0.10497 0.44938 0.08772-0.89333 0.99059
  -1  13  -3  743.71  314.68   1 0.22330-0.32549 0.15516 0.38183-0.96231 0.86501
   1  13  -3  439.75  219.78   1 0.28545-0.18326 0.05940 0.47760-0.95655 0.85924
  -1  13   3  545.43  296.49   1 0.54794-0.65013 0.51130 0.02557-0.66206 0.75938
   1  13   3  887.07  372.02   1 0.50328-0.40104 0.33552 0.20144-0.79632 0.89363
  -1  13  -3  543.46  185.22   1 0.46311-0.56532 0.21957 0.31717-0.85866 0.76145
   1  13  -3  872.56  349.90   1 0.39059-0.28839 0.04601 0.49073-0.91941 0.82219
  -1  13   411367.45 1580.67   1-0.03746-0.06475 0.49623 0.04087-0.86737 0.99706
   1  13   413031.23 1436.17   1-0.05027 0.15248 0.51073 0.02637-0.85826 0.98795
  -1  13  -413341.51  995.80   1 0.25322-0.35541 0.10987 0.42712-0.96114 0.83141
   1  13  -410990.25 1795.06   1 0.31937-0.21718 0.00418 0.53282-0.94761 0.81788
  -1  13   413767.78 1767.42   1 0.55464-0.65683 0.55028-0.01340-0.62414 0.75391
   1  13   412578.36 2273.16   1 0.51680-0.41456 0.38076 0.15619-0.76676 0.89651
  -1  13  -412435.60 1723.18   1 0.44188-0.54408 0.16495 0.37179-0.88177 0.75215
   1  13  -413308.08  713.66   1 0.36837-0.26614-0.00086 0.53779-0.92967 0.79996
   1  13   5 3011.99  463.76   1-0.10352 0.20574 0.56872-0.03161-0.81598 0.97809
  -1  13   5 2215.88  518.87   1-0.07746-0.02474 0.54079-0.00368-0.83758 0.99968
  -1  13  -5 2041.29  530.25   1 0.28068-0.38287 0.06698 0.47002-0.95745 0.79528
   1  13  -5 2046.01  488.06   1 0.34929-0.24710-0.04628 0.58332-0.93586 0.77374
  -1  13   5 1943.11  498.81   1 0.55951-0.66170 0.58619-0.04932-0.58593 0.74814
   1  13   5 2293.02  514.17   1 0.52854-0.42630 0.42417 0.11278-0.73533 0.89751
  -1  13  -5 2059.04  613.23   1 0.41917-0.52138 0.11034 0.42640-0.90117 0.73915
   1  13  -5 2379.17  474.12   1 0.34606-0.24382-0.04618 0.58311-0.93707 0.77493
   1  13   6 1370.49  341.38   1-0.15510 0.25732 0.62122-0.08377-0.76812 0.96268
  -1  13   6  341.38  191.99   1-0.11686 0.01464 0.58259-0.04514-0.80431 0.99887
  -1  13  -6 1880.95  582.29   1 0.30567-0.40786 0.02675 0.51025-0.95175 0.75715
   1  13  -6  685.56  345.08   1 0.37532-0.27314-0.09206 0.62910-0.92230 0.72775
  -1  13   6  921.37  307.34   1 0.56272-0.66491 0.61914-0.08227-0.54772 0.74237
   1  13   6  667.11  448.09   1 0.53844-0.43625 0.46561 0.07126-0.70234 0.89699
  -1  13  -6 1690.45  389.89   1 0.39540-0.49760 0.05652 0.48022-0.91676 0.72233
   1  13  -6 1309.01  409.47   1 0.32383-0.22159-0.08951 0.62644-0.94187 0.74730
   1  13   7 3327.65  446.84   1-0.20393 0.30615 0.66758-0.13012-0.71606 0.94304
  -1  13   7 4320.25  990.12   1-0.15513 0.05291 0.62126-0.08380-0.76809 0.99507
  -1  13  -7 5309.17  681.73   1 0.32825-0.43044-0.01064 0.54765-0.94452 0.71749
   1  13  -7 3396.65  670.75   1 0.39787-0.29568-0.13315 0.67019-0.90772 0.68074
  -1  13   7 4157.36  662.08   1 0.56417-0.66638 0.64930-0.11258-0.51000 0.73705
   1  13   7 4522.23  633.94   1 0.54668-0.44449 0.50474 0.03212-0.66810 0.89520
  -1  13  -7 3235.09  472.34   1 0.37079-0.47303 0.00415 0.53276-0.92870 0.70171
   1  13  -7 4539.49  667.78   1 0.30195-0.19971-0.13055 0.66747-0.94434 0.71734
   1  13   8 1418.98  454.25   1-0.24948 0.35171 0.70759-0.17014-0.66110 0.92051
  -1  13   8 1394.32  448.34   1-0.19201 0.08978 0.65658-0.11913-0.72939 0.98881
  -1  13  -8 2312.51  463.01   1 0.34855-0.45073-0.04500 0.58204-0.93620 0.67680
   1  13  -8 1655.27  466.92   1 0.41728-0.31509-0.16975 0.70678-0.89278 0.63337
  -1  13   8 2223.85  411.35   1 0.56458-0.66679 0.67676-0.14003-0.47248 0.73196
   1  13   8 2262.16  385.22   1 0.55326-0.45108 0.54156-0.00469-0.63293 0.89247
  -1  13  -8 1942.00  361.24   1 0.34618-0.44841-0.04595 0.58288-0.93704 0.67762
   1  13  -8 2197.45  619.34   1 0.28067-0.17844-0.16906 0.70598-0.94479 0.68537
   1  13   9 4364.29 1021.14   1-0.29087 0.39300 0.74136-0.20452-0.60478 0.89649
  -1  13   9 5570.39  660.30   1-0.22723 0.12500 0.68845-0.15100-0.68875 0.98059
  -1  13  -9 4075.31  607.80   1 0.36662-0.46880-0.07656 0.61360-0.92721 0.63538
   1  13  -9 4916.26  856.77   1 0.43392-0.33174-0.20213 0.73917-0.87798 0.58614
  -1  13   9 4562.36  782.36   1 0.56382-0.66604 0.70172-0.16500-0.43551 0.72743
   1  13   9 5434.87  819.98   1 0.55827-0.45608 0.57603-0.03915-0.59709 0.88907
  -1  13  -9 5565.44  771.50   1 0.32182-0.42406-0.09333 0.63026-0.94218 0.65033
   1  13  -9 4545.61  704.58   1 0.26022-0.15798-0.20490 0.74183-0.94355 0.65170
   1  13  10 1568.66  432.84   1-0.32899 0.43113 0.76926-0.23242-0.54771 0.87183
  -1  13  10 2107.76  663.45   1-0.26024 0.15810 0.71694-0.18010-0.64673 0.97085
  -1  13 -10 3207.09  567.01   1 0.38265-0.48483-0.10526 0.64230-0.91787 0.59361
   1  13 -10 3028.23  490.84   1 0.44814-0.34595-0.23063 0.76767-0.86370 0.53944
  -1  13  10 2505.06  538.45   1 0.56204-0.66426 0.72438-0.18766-0.39920 0.72355
   1  13  10 1437.08  437.03   1 0.56179-0.45960 0.60815-0.07128-0.56083 0.88525
  -1  13 -10 2356.02  547.06   1 0.29812-0.40036-0.13758 0.67450-0.94456 0.62028
   1  13  11 1360.47  391.75   1-0.36337 0.46550 0.79175-0.25491-0.49099 0.84753
  -1  13  11  599.91  364.78   1-0.29166 0.18952 0.74196-0.20512-0.60366 0.96020
  -1  13 -11  672.87  472.50   1 0.39681-0.49899-0.13118 0.66822-0.90847 0.55179
   1  13 -11  481.72  272.91   1 0.46012-0.35792-0.25536 0.79244-0.85034 0.49388
  -1  13  11 1341.95  521.91   1 0.55936-0.66157 0.74491-0.20819-0.36360 0.72039
  -1  13 -11 1590.45  326.44   1 0.27539-0.37762-0.17843 0.71536-0.94462 0.58792
  -1  13  12  523.13  171.57   1-0.32108 0.21895 0.76371-0.22687-0.56004 0.94899
  -1  13 -12 1296.11  483.67   1 0.40925-0.51144-0.15447 0.69151-0.89924 0.51013
   1  13 -12  213.89  355.35   1 0.47038-0.36819-0.27707 0.81415-0.83783 0.44897
  -1  13  12  684.51  215.37   1 0.55588-0.65809 0.76349-0.22676-0.32874 0.71797
   1  13  12  832.62  483.55   1 0.56456-0.46234 0.66563-0.12891-0.48805 0.87727
  -1  13 -12  582.88  155.30   1 0.25389-0.35612-0.21577 0.75270-0.94285 0.55372
  -1  13  13 1935.15  464.15   1-0.34850 0.24636 0.78236-0.24552-0.51619 0.93756
  -1  13 -13 2062.71  416.03   1 0.42014-0.52233-0.17525 0.71229-0.89037 0.46883
   1  13 -13 2410.83  484.07   1 0.47907-0.37687-0.29588 0.83296-0.82640 0.40514
  -1  13  13 1982.60  512.15   1 0.55208-0.65430 0.78014-0.24321-0.29424 0.71605
   1  13  13 2173.32  509.10   1 0.56429-0.46207 0.69107-0.15435-0.45164 0.87330
  -1  13  14  810.93  323.60   1-0.37395 0.27181 0.79810-0.26126-0.47242 0.92620
  -1  13 -14 1137.07  349.19   1 0.42963-0.53182-0.19368 0.73072-0.88198 0.42802
   1  13 -14 1225.55  656.55   1 0.48638-0.38419-0.31205 0.84913-0.81612 0.36245
  -1  13  14 2324.82  486.11   1 0.54728-0.64950 0.79524-0.25832-0.26087 0.71513
   1  13  14 2080.54  417.73   1 0.56296-0.46075 0.71446-0.17774-0.41545 0.86954
  -1  13 -15  731.81  278.51   1 0.43785-0.54004-0.20993 0.74697-0.87419 0.38780
   1  13 -15  105.20  354.12   1 0.49250-0.39031-0.32585 0.86293-0.80700 0.32093
  -1  13  15  288.51  275.46   1 0.54192-0.64414 0.80884-0.27191-0.22823 0.71494
   1  13  15  862.78  249.57   1 0.56067-0.45846 0.73590-0.19918-0.37957 0.86610
  -1  13 -16 1445.73  591.99   1 0.44493-0.54712-0.22413 0.76117-0.86706 0.34824
   1  13 -16 1005.33  389.00   1 0.49760-0.39540-0.33752 0.87460-0.79904 0.28056
  -1  13  16 1959.26  706.75   1 0.53606-0.63828 0.82103-0.28411-0.19630 0.71545
   1  13  16 1835.01  459.95   1 0.55751-0.45529 0.75550-0.21878-0.34407 0.86304
  -1  13 -17 1221.30  448.67   1 0.45098-0.55317-0.23644 0.77347-0.86064 0.30940
   1  13 -17 1371.66  440.79   1 0.50179-0.39960-0.34727 0.88435-0.79221 0.24133
  -1 -13 -17 1025.16  291.01   1 0.50298-0.60525-0.84476 0.30746 0.18269-0.73425
  -1  13  17 1384.36  476.28   1 0.52975-0.63196 0.83193-0.29501-0.16504 0.71664
   1  13  17 1053.71  347.86   1 0.55355-0.45133 0.77336-0.23664-0.30900 0.86040
  -1  13 -18 2049.19  522.85   1 0.45611-0.55830-0.24699 0.78402-0.85495 0.27129
   1  13 -18 1701.73  379.68   1 0.50519-0.40300-0.35527 0.89235-0.78648 0.20319
  -1 -13 -18 1986.68  514.49   1 0.51789-0.62016-0.84425 0.30695 0.13792-0.72192
  -1  13  18 2343.58  650.41   1 0.52302-0.62524 0.84164-0.30472-0.13443 0.71848
   1  13  18 1757.16  474.14   1 0.54927-0.44705 0.78941-0.25249-0.27408 0.85813
  -1  13 -19  647.95  424.74   1 0.46032-0.56251-0.25577 0.79285-0.85010 0.23441
   1  13 -19  962.58  475.34   1 0.50789-0.40570-0.36170 0.89878-0.78179 0.16610
  -1 -13 -19 1173.27  408.45   1 0.53103-0.63330-0.84201 0.30471 0.09494-0.71139
  -1  13  19 1077.09  538.26   1 0.51591-0.61813 0.85024-0.31332-0.10443 0.72092
   1  13  19  607.64  306.70   1 0.54392-0.44170 0.80409-0.26716-0.23996 0.85645
  -1  13 -20  329.38  224.82   1 0.46385-0.56605-0.26320 0.80028-0.84590 0.19781
   1  13 -20  337.40  288.07   1 0.50997-0.40778-0.36669 0.90377-0.77811 0.13001
  -1 -13 -20  402.63  252.95   1 0.54260-0.64486-0.83827 0.30097 0.05364-0.70253
  -1  14   0  301.64  249.90   1 0.10795-0.21015 0.31726 0.26105-0.94217 0.94217
   1  14   0  331.12  216.43   1 0.14057-0.03837 0.27334 0.30496-0.95158 0.95158
  -1  14   0  352.42  197.61   1 0.51940-0.62164 0.39000 0.18826-0.76033 0.76033
   1  14   0  189.97  387.21   1 0.46191-0.35971 0.21637 0.36165-0.86012 0.86012
  -1  14   1 6361.23  943.40   1 0.07211-0.17430 0.36391 0.21440-0.92863 0.96106
   1  14   1 6409.98  569.43   1 0.09450 0.00768 0.33496 0.24334-0.93747 0.96990
  -1  14  -1 8208.31  616.38   1 0.14237-0.24457 0.27087 0.30744-0.95202 0.91959
   1  14  -1 6679.43  750.68   1 0.18385-0.08166 0.21279 0.36552-0.95964 0.92721
  -1  14   1 5722.86  696.85   1 0.53098-0.63322 0.43379 0.14447-0.72793 0.76036
  -1  14  -1 5762.01  797.18   1 0.50596-0.60820 0.34417 0.23409-0.79091 0.75847
   1  14   1 7834.24 1624.44   1 0.47859-0.37634 0.26148 0.31678-0.83819 0.87063
   1  14  -1 7549.04 1075.17   1 0.44434-0.34213 0.17109 0.40693-0.87936 0.84696
  -1  14   2  910.02  379.59   1 0.03511-0.13732 0.41024 0.16818-0.91130 0.97614
   1  14   2  352.55  143.46   1 0.04622 0.05599 0.39649 0.18193-0.91687 0.98171
  -1  14  -2  471.83  282.00   1 0.17509-0.27728 0.22527 0.35304-0.95843 0.89357
   1  14  -2  693.57  318.12   1 0.22386-0.12167 0.15432 0.42399-0.96232 0.89745
  -1  14   2  378.84  203.55   1 0.54057-0.64276 0.47520 0.10296-0.69422 0.75911
   1  14   2 1172.67  484.83   1 0.49375-0.39151 0.30583 0.27242-0.81404 0.87892
  -1  14  -2  707.95  264.60   1 0.49070-0.59294 0.29665 0.28161-0.81927 0.75439
   1  14  -2  553.17  263.63   1 0.42580-0.32360 0.12593 0.45209-0.89600 0.83119
   1  14   3  758.59  385.96   1-0.00332 0.10553 0.45660 0.12181-0.88966 0.98692
  -1  14   3 1579.14  465.55   1-0.00251-0.09969 0.45565 0.12276-0.89015 0.98741
  -1  14  -3  712.43  261.09   1 0.20584-0.30803 0.18093 0.39737-0.96171 0.86441
   1  14  -3 1327.98  479.90   1 0.26042-0.15823 0.09876 0.47955-0.96043 0.86312
  -1  14   3  888.68  238.02   1 0.54849-0.65068 0.51423 0.06393-0.65932 0.75665
   1  14   3  536.07  301.29   1 0.50749-0.40525 0.34919 0.22907-0.78772 0.88503
  -1  14  -3 1124.47  429.11   1 0.47373-0.57597 0.24791 0.33035-0.84505 0.74773
   1  14  -3  840.73  242.90   1 0.40651-0.30431 0.08130 0.49673-0.91001 0.81280
   1  14   4 8184.81  572.08   1-0.05330 0.15551 0.51413 0.06429-0.85605 0.98573
  -1  14   4 8297.58 1377.97   1-0.04044-0.06176 0.49963 0.07878-0.86529 0.99497
  -1  14  -4 7383.19 1547.63   1 0.23454-0.33673 0.13832 0.43999-0.96221 0.83247
   1  14  -4 9214.72  562.34   1 0.29338-0.19119 0.04668 0.53162-0.95485 0.82511
  -1  14   4 8347.24 1139.03   1 0.55471-0.65689 0.55071 0.02746-0.62370 0.75347
   1  14   4 6652.84 1398.26   1 0.51974-0.41750 0.39124 0.18702-0.75946 0.88921
  -1  14  -4 7956.40 1511.12   1 0.45505-0.55726 0.19838 0.37964-0.86808 0.73846
   1  14  -4 8601.40 1128.86   1 0.38671-0.28450 0.03758 0.54044-0.92143 0.79181
   1  14   5 1785.95  448.74   1-0.10283 0.20504 0.56798 0.01044-0.81659 0.97869
  -1  14   5 1845.05  432.08   1-0.07827-0.02393 0.54168 0.03674-0.83693 0.99903
  -1  14  -5 2139.06  516.56   1 0.26107-0.36326 0.09775 0.48056-0.96035 0.79818
   1  14  -5 2122.17  334.15   1 0.32280-0.22061-0.00152 0.57983-0.94646 0.78429
  -1  14   5 2319.51  494.71   1 0.55932-0.66151 0.58461-0.00644-0.58769 0.74990
   1  14   5 2480.77  546.28   1 0.53046-0.42822 0.43173 0.14652-0.72952 0.89171
  -1  14  -5 2291.46  466.89   1 0.43534-0.53754 0.14886 0.42917-0.88787 0.72584
   1  14  -5 3211.57  684.87   1 0.36647-0.26424-0.00480 0.58303-0.93041 0.76827
   1  14   6 1063.25  282.65   1-0.15116 0.25338 0.61733-0.03853-0.77203 0.96659
  -1  14   6  596.08  215.10   1-0.11571 0.01348 0.58140-0.00260-0.80534 0.99990
  -1  14  -6 1252.38  504.35   1 0.28540-0.38759 0.05947 0.51883-0.95655 0.76195
   1  14  -6  949.85  307.24   1 0.34890-0.24671-0.04560 0.62395-0.93604 0.74149
  -1  14   6 1556.99  551.99   1 0.56247-0.66465 0.61598-0.03781-0.55153 0.74618
   1  14   6  547.47  310.65   1 0.53955-0.43736 0.47057 0.10759-0.69816 0.89282
  -1  14  -6 1797.61  406.84   1 0.41463-0.51684 0.09982 0.47820-0.90449 0.71006
   1  14  -6 1305.16  532.39   1 0.34634-0.24410-0.04563 0.62386-0.93699 0.74243
   1  14   711261.50  801.83   1-0.19732 0.29955 0.66151-0.08271-0.72350 0.95048
  -1  14   7 9236.89  893.27   1-0.15223 0.05001 0.61839-0.03960-0.77097 0.99796
  -1  14  -712130.26 1494.69   1 0.30756-0.40975 0.02365 0.55465-0.95123 0.72419
   1  14  -710028.98 1829.78   1 0.37177-0.26959-0.08572 0.66407-0.92435 0.69737
  -1  14   7 9076.01 1204.92   1 0.56399-0.66621 0.64494-0.06693-0.51570 0.74274
   1  14   711142.41 1809.05   1 0.54721-0.44502 0.50744 0.07072-0.66562 0.89272
  -1  14  -710566.99 1726.32   1 0.39328-0.49548 0.05187 0.52616-0.91795 0.69111
   1  14  -712220.16 2029.43   1 0.32640-0.22417-0.08458 0.66281-0.94143 0.71444
   1  14   8 1115.11  357.05   1-0.24087 0.34309 0.70028-0.12148-0.67199 0.93141
  -1  14   8 1545.53  572.79   1-0.18762 0.08539 0.65248-0.07368-0.73420 0.99361
  -1  14  -8 1633.26  505.06   1 0.32762-0.42981-0.00959 0.58791-0.94475 0.68528
   1  14  -8 2636.49  721.03   1 0.39176-0.28957-0.12188 0.70023-0.91195 0.65254
  -1  14   8 2059.92  648.32   1 0.56459-0.66681 0.67154-0.09353-0.47984 0.73933
   1  14   8 1398.45  387.67   1 0.55339-0.45120 0.54233 0.03583-0.63216 0.89170
  -1  14  -8  525.08  267.96   1 0.37142-0.47366 0.00547 0.57275-0.92844 0.66902
   1  14  -8 2412.68  686.10   1 0.30688-0.20465-0.12142 0.69965-0.94396 0.68454
   1  14   9 1064.10  205.05   1-0.28085 0.38299 0.73356-0.15543-0.61886 0.91058
  -1  14   9 1734.86  339.33   1-0.22163 0.11940 0.68352-0.10472-0.69546 0.98730
  -1  14  -9 1636.85  436.66   1 0.34572-0.44790-0.04013 0.61848-0.93747 0.64564
   1  14  -9 1466.85  303.17   1 0.40914-0.30695-0.15426 0.73260-0.89933 0.60750
  -1  14   9 1295.95  348.86   1 0.56410-0.66632 0.69593-0.11792-0.44436 0.73627
   1  14   9 1064.59  463.27   1 0.55816-0.45597 0.57518 0.00298-0.59800 0.88998
  -1  14  -9 1849.37  607.81   1 0.34977-0.45200-0.03879 0.61702-0.93603 0.64418
   1  14  -9 1388.10  416.50   1 0.28797-0.18573-0.15600 0.73423-0.94484 0.65299
   1  14  10 5301.33 1051.58   1-0.31817 0.42030 0.76164-0.18350-0.56450 0.88863
  -1  14  10 4663.54 1057.99   1-0.25408 0.15185 0.71144-0.13265-0.65519 0.97946
  -1  14 -10 4830.50 1372.17   1 0.36188-0.46407-0.06821 0.64656-0.92972 0.60546
   1  14 -10 5209.45  733.78   1 0.42419-0.32201-0.18308 0.76143-0.88686 0.56261
  -1  14  10 5384.53 1119.08   1 0.56264-0.66486 0.71824-0.14023-0.40933 0.73368
   1  14  10 5236.65 1244.26   1 0.56159-0.45940 0.60599-0.02782-0.56336 0.88778
  -1  14 -10 5430.60  883.20   1 0.32847-0.43071-0.08059 0.65882-0.94106 0.61679
   1  14 -10 6005.90 1218.91   1 0.26982-0.16758-0.18821 0.76644-0.94433 0.62005
   1  14  11 2082.09  499.23   1-0.35222 0.45435 0.78476-0.20662-0.50998 0.86652
  -1  14  11 2214.43  410.71   1-0.28443 0.18230 0.73636-0.15823-0.61388 0.97042
  -1  14 -11 2684.71  622.97   1 0.37628-0.47847-0.09379 0.67213-0.92174 0.56505
   1  14 -11 2634.80  534.52   1 0.43718-0.33499-0.20859 0.78694-0.87484 0.51816
  -1  14  11 2688.90  425.68   1 0.56030-0.66252 0.73861-0.16060-0.37483 0.73162
   1  14  11 1450.08  493.86   1 0.56377-0.46158 0.63476-0.05659-0.52842 0.88528
  -1  14 -11 2610.79  415.77   1 0.30783-0.41006-0.11966 0.69789-0.94388 0.58718
   1  14 -11 3599.90  696.29   1 0.25257-0.15033-0.21802 0.79624-0.94269 0.58599
  -1  14  12  667.26  334.20   1-0.31341 0.21128 0.75821-0.18007-0.57174 0.96069
  -1  14 -12 1167.09  745.32   1 0.38906-0.49125-0.11693 0.69528-0.91375 0.52464
   1  14 -12 1094.30  515.42   1 0.44835-0.34616-0.23106 0.80941-0.86347 0.47436
  -1  14  12  761.53  428.09   1 0.55718-0.65940 0.75718-0.17917-0.34090 0.73012
   1  14  12 2581.37  625.35   1 0.56450-0.46228 0.66161-0.08360-0.49355 0.88277
  -1  14 -12 1186.25  397.34   1 0.28806-0.39030-0.15583 0.73405-0.94484 0.55571
  -1  14  13  240.93  208.40   1-0.34059 0.23846 0.77715-0.19901-0.52917 0.95054
  -1  14 -13  407.74  169.19   1 0.40034-0.50253-0.13775 0.71610-0.90595 0.48441
   1  14 -13  725.35  343.67   1 0.45780-0.35561-0.25053 0.82892-0.85302 0.43175
  -1  14  13  -41.51  320.11   1 0.55375-0.65597 0.77395-0.19573-0.30715 0.72896
   1  14  13  842.47  375.21   1 0.56442-0.46221 0.68647-0.10846-0.45845 0.88011
  -1  14 -13  552.06  256.29   1 0.26938-0.37161-0.18899 0.76722-0.94430 0.52274
  -1  14  14 1648.29  427.86   1-0.36598 0.26385 0.79334-0.21521-0.48647 0.94024
  -1  14 -14 1028.55  290.68   1 0.41026-0.51244-0.15637 0.73472-0.89846 0.44449
   1  14 -14 1897.12  537.10   1 0.46597-0.36377-0.26766 0.84606-0.84334 0.38967
  -1  14  14 1898.60  445.82   1 0.54931-0.65153 0.78926-0.21104-0.27441 0.72867
   1  14  14 1396.28  571.25   1 0.56334-0.46113 0.70945-0.13144-0.42344 0.87754
  -1  14 -14  887.79  231.88   1 0.25190-0.35414-0.21916 0.79738-0.94260 0.48862
  -1  14 -15 1163.02  632.16   1 0.41893-0.52111-0.17291 0.75126-0.89140 0.40501
   1  14 -15 1044.08  311.58   1 0.47290-0.37070-0.28247 0.86087-0.83460 0.34853
  -1  14  15 2212.86  598.11   1 0.54431-0.64652 0.80313-0.22490-0.24227 0.72898
   1  14  15 1376.00  467.60   1 0.56134-0.45912 0.73065-0.15264-0.38862 0.87515
  -1  14 -16  197.22  320.61   1 0.42647-0.52865-0.18750 0.76585-0.88485 0.36603
   1  14 -16 1085.21  469.72   1 0.47874-0.37655-0.29517 0.87356-0.82684 0.30837
  -1  14  16  885.08  489.31   1 0.53878-0.64100 0.81565-0.23743-0.21073 0.72988
   1  14  16  372.69  412.12   1 0.55849-0.45627 0.75014-0.17213-0.35406 0.87302
  -1  14 -17 2641.39  665.15   1 0.43298-0.53516-0.20027 0.77862-0.87887 0.32763
   1  14 -17 1759.63  328.32   1 0.48363-0.38144-0.30593 0.88433-0.82005 0.26917
  -1 -14 -17 1478.84  408.35   1 0.49502-0.59729-0.84430 0.26567 0.20518-0.75674
  -1  14  17 1021.36  312.12   1 0.53279-0.63501 0.82692-0.24870-0.17977 0.73137
   1  14  17 1979.02  533.02   1 0.55485-0.45264 0.76801-0.19000-0.31981 0.87121
  -1  14 -18  532.71  356.25   1 0.43855-0.54074-0.21132 0.78967-0.87350 0.28983
   1  14 -18  950.71  462.87   1 0.48767-0.38548-0.31495 0.89334-0.81423 0.23094
  -1 -14 -18 1695.61  446.16   1 0.51072-0.61299-0.84473 0.26610 0.15991-0.74392
  -1  14  18 1631.98  405.08   1 0.52637-0.62858 0.83703-0.25880-0.14936 0.73341
   1  14  18  494.68  286.86   1 0.55090-0.44869 0.78418-0.20595-0.28558 0.86963
  -1  14 -19    0.13  230.72   1 0.44327-0.54546-0.22079 0.79914-0.86876 0.25267
   1  14 -19 1207.71  506.22   1 0.49096-0.38877-0.32235 0.90075-0.80934 0.19365
  -1 -14 -19  336.62  245.53   1 0.52465-0.62691-0.84333 0.26470 0.11628-0.73273
  -1  14  19  409.36  240.71   1 0.51955-0.62176 0.84604-0.26781-0.11949 0.73598
   1  14  19  559.43  309.69   1 0.54590-0.44368 0.79903-0.22080-0.25206 0.86855
  -1  15   0  500.11  314.04   1 0.09527-0.19747 0.33395 0.28567-0.93776 0.93776
   1  15   0  564.91  226.72   1 0.12234-0.02015 0.29806 0.32156-0.94667 0.94667
  -1  15   0 -147.66  255.18   1 0.52340-0.62564 0.40459 0.21497-0.74990 0.74990
   1  15   0  364.82  379.18   1 0.47104-0.36880 0.24049 0.37908-0.84869 0.84869
  -1  15   1 4758.44 1059.96   1 0.06137-0.16356 0.37756 0.24205-0.92394 0.95637
  -1  15  -1 4530.40  662.15   1 0.12791-0.23011 0.29055 0.32906-0.94826 0.91583
   1  15  -1 6243.12  839.20   1 0.16312-0.06093 0.24212 0.37749-0.95643 0.92400
  -1  15   1 4918.52 1027.94   1 0.53368-0.63592 0.44479 0.17477-0.71926 0.75170
  -1  15  -1 4425.76  723.62   1 0.51155-0.61379 0.36270 0.25686-0.77894 0.74650
   1  15   1 5631.10  870.70   1 0.48581-0.38357 0.28221 0.33735-0.82724 0.85968
   1  15  -1 7356.97  636.14   1 0.45507-0.35286 0.19842 0.42089-0.86806 0.83565
  -1  15   2 7405.36 1247.75   1 0.02640-0.12861 0.42091 0.19882-0.90671 0.97155
   1  15   2 6959.68  933.18   1 0.03421 0.06799 0.41134 0.20839-0.91083 0.97567
  -1  15  -2 6973.93  515.83   1 0.15904-0.26123 0.24783 0.37179-0.95565 0.89080
   1  15  -2 5451.84 1154.86   1 0.20112-0.09893 0.18781 0.43180-0.96139 0.89652
  -1  15   2 6591.77 1154.29   1 0.54226-0.64444 0.48302 0.13644-0.68749 0.75237
  -1  15  -2 7337.29  848.16   1 0.49817-0.60041 0.31942 0.30015-0.80609 0.74122
   1  15   2 5706.48  565.28   1 0.49944-0.39720 0.32336 0.29621-0.80373 0.86861
   1  15  -2 8146.85  852.57   1 0.43846-0.33626 0.15651 0.46280-0.88501 0.82020
  -1  15   3  879.87  373.30   1-0.00915-0.09305 0.46348 0.15625-0.88605 0.98332
   1  15   3  713.02  285.87   1-0.01188 0.11409 0.46668 0.15305-0.88434 0.98160
  -1  15  -3  312.01  235.94   1 0.18846-0.29065 0.20619 0.41342-0.96019 0.86290
   1  15  -3  479.95  285.48   1 0.23619-0.13400 0.13583 0.48379-0.96216 0.86486
  -1  15   3  722.67  276.03   1 0.54942-0.65161 0.51928 0.10018-0.65457 0.75190
   1  15   3  697.26  380.81   1 0.51183-0.40959 0.36364 0.25592-0.77832 0.87563
  -1  15  -3 1263.13  590.10   1 0.48335-0.58559 0.27509 0.34447-0.83107 0.73376
   1  15  -3  466.75  345.58   1 0.42116-0.31896 0.11500 0.50432-0.89966 0.80244
  -1  15  -4 1711.91  449.15   1 0.21601-0.31820 0.16598 0.45363-0.96217 0.83244
   1  15  -4 2797.99  703.55   1 0.26816-0.16597 0.08670 0.53292-0.95946 0.82972
  -1  15   4 2135.41  514.62   1 0.55512-0.65730 0.55340 0.06606-0.62095 0.75072
   1  15   4 3581.81  525.06   1 0.52292-0.42068 0.40282 0.21674-0.75118 0.88093
  -1  15  -4 2446.48  548.16   1 0.46701-0.56921 0.23003 0.38928-0.85380 0.72418
   1  15  -4 2682.96  698.26   1 0.40336-0.30116 0.07421 0.54510-0.91202 0.78240
   1  15   5 3649.72  707.20   1-0.10469 0.20690 0.56994 0.04979-0.81498 0.97709
  -1  15   5 6859.18  934.17   1-0.08090-0.02131 0.54452 0.07521-0.83483 0.99693
  -1  15  -5 3966.57 1317.24   1 0.24166-0.34385 0.12755 0.49207-0.96194 0.79977
   1  15  -5 3705.89  816.17   1 0.29704-0.19485 0.04078 0.57883-0.95399 0.79182
  -1  15   5 3946.24  889.81   1 0.55941-0.66160 0.58535 0.03411-0.58686 0.74907
   1  15   5 4519.60  587.35   1 0.53268-0.43044 0.44068 0.17888-0.72252 0.88471
  -1  15  -5 5249.38  471.63   1 0.44982-0.55202 0.18493 0.43439-0.87376 0.71173
   1  15  -5 4861.97  837.72   1 0.38526-0.28305 0.03445 0.58486-0.92216 0.76014
   1  15   6 2493.74  367.97   1-0.15011 0.25233 0.61629 0.00384-0.77307 0.96763
  -1  15   6  570.11  287.21   1-0.11652 0.01430 0.58224 0.03789-0.80462 0.99917
  -1  15  -6 1544.84  560.32   1 0.26534-0.36753 0.09110 0.52851-0.95983 0.76523
   1  15  -6  722.36  363.54   1 0.32291-0.22072-0.00170 0.62132-0.94642 0.75182
  -1  15   6 1013.61  288.97   1 0.56240-0.66459 0.61514 0.00432-0.55254 0.74719
   1  15   6 1781.54  356.08   1 0.54099-0.43880 0.47713 0.14233-0.69258 0.88723
  -1  15  -6 1822.55  552.96   1 0.43173-0.53394 0.14012 0.47919-0.89104 0.69661
   1  15  -6 1281.42  377.95   1 0.36689-0.26465-0.00394 0.62347-0.93025 0.73568
   1  15   7 1348.48  256.18   1-0.19378 0.29601 0.65823-0.03809-0.72743 0.95442
  -1  15   7 1060.31  278.28   1-0.15140 0.04917 0.61757 0.00256-0.77180 0.99878
  -1  15  -7 1358.58  440.88   1 0.28707-0.38926 0.05680 0.56281-0.95622 0.72918
   1  15  -7 1191.32  472.63   1 0.34598-0.24379-0.04058 0.66024-0.93736 0.71038
  -1  15   7 1551.39  358.60   1 0.56390-0.66612 0.64284-0.02354-0.51842 0.74546
   1  15   7 1746.35  582.20   1 0.54805-0.44586 0.51189 0.10757-0.66151 0.88860
  -1  15  -7 1283.50  337.56   1 0.41301-0.51521 0.09609 0.52323-0.90564 0.67880
   1  15  -7 1025.87  317.60   1 0.34875-0.24651-0.04083 0.66036-0.93632 0.70933
   1  15   8  744.46  187.52   1-0.23533 0.33756 0.69552-0.07538-0.67886 0.93827
  -1  15   8 1055.43  296.81   1-0.18535 0.08313 0.65035-0.03021-0.73666 0.99608
  -1  15  -8 1697.34  532.34   1 0.30689-0.40908 0.02476 0.59485-0.95142 0.69194
   1  15  -8 2068.25  503.09   1 0.36634-0.26416-0.07608 0.69574-0.92736 0.66795
  -1  15   8 2007.75  565.42   1 0.56458-0.66680 0.66847-0.04918-0.48412 0.74360
   1  15   8 1365.67  332.50   1 0.55380-0.45162 0.54493 0.07453-0.62955 0.88909
  -1  15  -8  734.64  245.37   1 0.39391-0.49612 0.05326 0.56605-0.91760 0.65836
   1  15  -8 1678.39  571.76   1 0.33088-0.22864-0.07595 0.69548-0.94060 0.68118
   1  15   9  387.60  225.24   1-0.27382 0.37595 0.72797-0.10854-0.62854 0.92025
  -1  15   9  666.76  242.53   1-0.21815 0.11593 0.68043-0.06028-0.69958 0.99142
  -1  15  -9  298.89  363.48   1 0.32486-0.42705-0.00496 0.62459-0.94574 0.65383
   1  15  -9  737.84  348.28   1 0.38427-0.28208-0.10819 0.72785-0.91685 0.62502
  -1  15   9  178.03  231.10   1 0.56425-0.66647 0.69215-0.07285-0.45004 0.74196
   1  15   9  586.17  333.64   1 0.55829-0.45610 0.57621 0.04325-0.59689 0.88887
  -1  15  -9   84.04  118.88   1 0.37472-0.47692 0.01204 0.60727-0.92705 0.63541
   1  15  -9  -89.85  300.14   1 0.31345-0.21122-0.10915 0.72868-0.94330 0.65145
   1  15  10 2515.14  541.50   1-0.31013 0.41226 0.75582-0.13639-0.57666 0.90079
  -1  15  10 3430.29  755.69   1-0.24962 0.14740 0.70771-0.08757-0.66092 0.98519
  -1  15 -10 3804.02  610.64   1 0.34108-0.44327-0.03238 0.65201-0.93947 0.61513
   1  15 -10 3320.93  869.44   1 0.39998-0.29779-0.13707 0.75673-0.90621 0.58195
  -1  15  10 3248.03  626.87   1 0.56300-0.66522 0.71396-0.09466-0.41626 0.74061
   1  15  10 4502.35  912.34   1 0.56156-0.45938 0.60570 0.01376-0.56370 0.88813
  -1  15 -10 3530.26  740.60   1 0.35548-0.45772-0.02729 0.64682-0.93428 0.61000
   1  15 -10 2614.67  682.39   1 0.29662-0.19438-0.14032 0.75985-0.94462 0.62035
   1  15  11  314.12  194.60   1-0.34361 0.44574 0.77915-0.15972-0.52425 0.88079
  -1  15  11 1008.80  352.96   1-0.27919 0.17706 0.73225-0.11282-0.62117 0.97771
  -1  15 -11  576.04  245.51   1 0.35569-0.45788-0.05738 0.67704-0.93283 0.57615
   1  15 -11  578.32  254.81   1 0.41369-0.31151-0.16289 0.78255-0.89572 0.53903
   1  15  11  915.57  455.67   1 0.56369-0.46150 0.63338-0.01391-0.53016 0.88702
  -1  15 -11  974.32  287.35   1 0.33684-0.43907-0.06437 0.68390-0.93935 0.58265
   1  15 -11 1102.48  563.79   1 0.28050-0.17826-0.16937 0.78890-0.94479 0.58808
   1  15  12  977.18  386.25   1-0.37424 0.47637 0.79827-0.17884-0.47190 0.86086
  -1  15  12 1185.26  419.65   1-0.30762 0.20549 0.75398-0.13455-0.58041 0.96936
  -1  15 -12  826.84  384.29   1 0.36872-0.47090-0.08028 0.69994-0.92606 0.53695
   1  15 -12  639.51  407.78   1 0.42563-0.32344-0.18587 0.80553-0.88560 0.49649
  -1  15  12  914.98  406.83   1 0.55809-0.66030 0.75240-0.13311-0.34988 0.73910
   1  15  12 1211.97  467.24   1 0.56446-0.46224 0.65935-0.04005-0.49662 0.88584
  -1  15 -12  643.32  248.69   1 0.31882-0.42105-0.09904 0.71857-0.94262 0.55349
   1  15 -12  622.35  424.94   1 0.26519-0.16296-0.19628 0.81581-0.94400 0.55487
  -1  15  13 1356.26  333.37   1-0.33444 0.23231 0.77300-0.15357-0.53907 0.96043
  -1  15 -13 1769.87  503.98   1 0.38031-0.48250-0.10103 0.72069-0.91932 0.49778
   1  15 -13 1953.94  682.72   1 0.43597-0.33378-0.20619 0.82585-0.87602 0.45448
  -1  15  13 1239.63  461.94   1 0.55456-0.65678 0.76924-0.14994-0.31736 0.73901
   1  15  13 1218.49  464.73   1 0.56449-0.46227 0.68352-0.06423-0.46274 0.88440
  -1  15 -13 2104.81  564.00   1 0.30160-0.40383-0.13119 0.75072-0.94436 0.52280
   1  15 -13 2391.32  770.22   1 0.25079-0.14855-0.22105 0.84058-0.94246 0.52090
  -1  15  14 2022.49  583.59   1-0.35964 0.25750 0.78944-0.17001-0.49742 0.95120
  -1  15 -14 1810.88  551.12   1 0.39059-0.49277-0.11972 0.73938-0.91274 0.45878
   1  15 -14 2403.03  672.75   1 0.44489-0.34271-0.22406 0.84372-0.86709 0.41313
  -1  15  14 1231.09  329.96   1 0.55081-0.65302 0.78450-0.16497-0.28488 0.73914
   1  15  14 1231.18  418.92   1 0.56357-0.46136 0.70600-0.08671-0.42887 0.88296
  -1  15 -14 1267.37  368.14   1 0.28533-0.38756-0.16075 0.78028-0.94485 0.49086
  -1  15 -15 1037.68  489.38   1 0.39964-0.50183-0.13645 0.75611-0.90645 0.42006
   1  15 -15 1585.51  499.47   1 0.45256-0.35037-0.23967 0.85933-0.85891 0.37252
  -1  15  15 -209.72  338.05   1 0.54610-0.64832 0.79849-0.17896-0.25332 0.74003
   1  15  15 1012.84  309.66   1 0.56178-0.45956 0.72685-0.10755-0.39507 0.88160
  -1  15 -15  534.84  330.21   1 0.27011-0.37234-0.18771 0.80724-0.94435 0.45793
  -1  15 -16 1965.66  762.12   1 0.40758-0.50977-0.15132 0.77098-0.90054 0.38172
   1  15 -16 1489.12  490.40   1 0.45901-0.35681-0.25303 0.87274-0.85163 0.33315
  -1  15  16 1620.90  556.71   1 0.54087-0.64309 0.81120-0.19167-0.22226 0.74141
   1  15  16 2571.96  808.73   1 0.55917-0.45695 0.74611-0.12681-0.36143 0.88040
  -1  15 -16 2119.13  504.41   1 0.25602-0.35826-0.21212 0.83165-0.94310 0.42426
  -1  15 -17  174.99  432.83   1 0.41450-0.51669-0.16444 0.78409-0.89506 0.34382
   1  15 -17 1146.08  572.60   1 0.46456-0.36236-0.26468 0.88439-0.84505 0.29417
  -1  15  17 1160.29  404.87   1 0.53516-0.63738 0.82271-0.20318-0.19167 0.74327
   1  15  17 1647.81  498.38   1 0.55579-0.45358 0.76386-0.14457-0.32801 0.87940
  -1  16   0 5874.66  966.05   1 0.08211-0.18430 0.35106 0.30986-0.93274 0.93274
   1  16   0 6215.69 1316.49   1 0.10417-0.00198 0.32225 0.33867-0.94090 0.94090
  -1  16   0 9237.32  829.83   1 0.52745-0.62970 0.41994 0.24092-0.73853 0.73853
   1  16   0 7562.93 1627.38   1 0.47953-0.37729 0.26416 0.39671-0.83681 0.83681
  -1  16   1  592.76  269.52   1 0.04992-0.15211 0.39195 0.26897-0.91862 0.95105
   1  16   1  126.12  180.37   1 0.06362 0.03856 0.37470 0.28622-0.92495 0.95738
  -1  16  -1  479.90  172.25   1 0.11316-0.21535 0.31034 0.35058-0.94386 0.91143
   1  16  -1  677.16  327.12   1 0.14273-0.04054 0.27037 0.39055-0.95211 0.91968
  -1  16   1  411.81  191.24   1 0.53643-0.63862 0.45688 0.20388-0.70957 0.74201
  -1  16  -1  474.09  268.71   1 0.51701-0.61925 0.38151 0.27935-0.76625 0.73381
   1  16   1  -86.95  348.70   1 0.49279-0.39055 0.30294 0.35793-0.81570 0.84814
   1  16  -1 -183.26  368.83   1 0.46516-0.36295 0.22504 0.43556-0.85614 0.82373
  -1  16   2 1671.61  547.71   1 0.01675-0.11896 0.43262 0.22843-0.90142 0.96626
   1  16   2  875.21  282.45   1 0.02142 0.08079 0.42697 0.23408-0.90401 0.96885
  -1  16  -2 2006.65  481.84   1 0.14286-0.24505 0.27020 0.39072-0.95214 0.88728
   1  16  -2 2090.74  323.27   1 0.17896-0.07677 0.21976 0.44116-0.95899 0.89413
  -1  16   2 1872.95  455.67   1 0.54420-0.64639 0.49233 0.16843-0.67929 0.74418
   1  16   2 2484.35  521.27   1 0.50505-0.40281 0.34122 0.31965-0.79277 0.85764
  -1  16  -2 2580.46  492.78   1 0.50526-0.60751 0.34191 0.31895-0.79233 0.72745
   1  16  -2 3543.35  587.31   1 0.45026-0.34805 0.18605 0.47455-0.87329 0.80848
   1  16   3 3259.75  586.27   1-0.02170 0.12391 0.47812 0.18292-0.87802 0.97528
  -1  16   3 3285.86  586.02   1-0.01695-0.08525 0.47260 0.18845-0.88111 0.97837
  -1  16  -3 2078.34  468.38   1 0.17105-0.27324 0.23098 0.42994-0.95780 0.86051
   1  16  -3 2396.94  513.01   1 0.21259-0.11040 0.17102 0.48990-0.96205 0.86475
  -1  16   3 3776.42  571.83   1 0.55064-0.65283 0.52607 0.13469-0.64810 0.74542
   1  16   3 2328.22  581.37   1 0.51622-0.41398 0.37875 0.28211-0.76814 0.86546
  -1  16  -3 4597.00  415.45   1 0.49229-0.59453 0.30143 0.35944-0.81656 0.71925
   1  16  -3 2444.31  615.88   1 0.43472-0.33252 0.14736 0.51324-0.88842 0.79120
   1  16   4 5771.65  716.45   1-0.06526 0.16747 0.52742 0.13363-0.84709 0.97677
  -1  16   4 8088.56  809.86   1-0.05099-0.05121 0.51153 0.14951-0.85774 0.98743
  -1  16  -4 7009.65 1120.40   1 0.19759-0.29978 0.19301 0.46791-0.96109 0.83137
   1  16  -4 4802.62  892.57   1 0.24357-0.14138 0.12463 0.53629-0.96183 0.83210
  -1  16   4 5953.96  891.25   1 0.55580-0.65799 0.55800 0.10276-0.61621 0.74598
   1  16   4 6027.22 1074.46   1 0.52626-0.42401 0.41534 0.24553-0.74198 0.87173
  -1  16  -4 6174.22  914.91   1 0.47820-0.58044 0.26038 0.40048-0.83876 0.70900
   1  16  -4 5293.38 1158.97   1 0.41871-0.31650 0.10925 0.55135-0.90152 0.77190
   1  16   5 2918.49  524.27   1-0.10866 0.21087 0.57411 0.08694-0.81153 0.97363
  -1  16   5 2096.72  362.45   1-0.08507-0.01713 0.54904 0.11201-0.83145 0.99355
  -1  16  -5 3202.86  760.70   1 0.22238-0.32457 0.15652 0.50440-0.96231 0.80014
   1  16  -5 2184.46  440.01   1 0.27184-0.16965 0.08094 0.57999-0.95893 0.79676
  -1  16   5 2205.77  365.30   1 0.55973-0.66191 0.58808 0.07268-0.58383 0.74604
   1  16   5 2276.63  905.40   1 0.53511-0.43287 0.45079 0.21007-0.71444 0.87663
  -1  16  -5 2253.78  407.60   1 0.46291-0.56512 0.21904 0.44157-0.85890 0.69688
   1  16  -5 2124.06  673.92   1 0.40237-0.30016 0.07199 0.58862-0.91264 0.75061
   1  16   6  436.81  205.11   1-0.15147 0.25369 0.61764 0.04383-0.77173 0.96628
  -1  16   6 1326.70  477.73   1-0.11904 0.01681 0.58485 0.07663-0.80235 0.99691
  -1  16  -6  751.73  364.89   1 0.24544-0.34763 0.12179 0.53913-0.96172 0.76712
   1  16  -6 1303.40  492.16   1 0.29742-0.19523 0.04016 0.62076-0.95389 0.75929
  -1  16   6  863.31  248.48   1 0.56249-0.66468 0.61630 0.04445-0.55114 0.74579
   1  16   6  705.16  238.83   1 0.54268-0.44049 0.48503 0.17572-0.68573 0.88038
  -1  16  -6 1150.02  336.53   1 0.44708-0.54929 0.17799 0.48261-0.87660 0.68217
   1  16  -6  451.39  268.60   1 0.38588-0.28368 0.03580 0.62480-0.92185 0.72742
   1  16   7 2413.50  385.17   1-0.19284 0.29506 0.65736 0.00412-0.72848 0.95546
  -1  16   7 2278.41  411.74   1-0.15238 0.05015 0.61854 0.04294-0.77083 0.99781
  -1  16  -7 2446.59  603.30   1 0.26673-0.36892 0.08894 0.57198-0.95965 0.73261
   1  16  -7 2156.38  439.48   1 0.32044-0.21824 0.00241 0.65851-0.94726 0.72022
  -1  16   7 1304.68  420.24   1 0.56390-0.66611 0.64271 0.01786-0.51858 0.74563
   1  16   7 2686.28  655.64   1 0.54916-0.44697 0.51782 0.14294-0.65595 0.88305
  -1  16  -7 1956.75  724.07   1 0.43064-0.53285 0.13750 0.52310-0.89198 0.66515
   1  16  -7 2349.41  482.96   1 0.36925-0.26702 0.00096 0.65986-0.92932 0.70233
   1  16   8 1391.71  518.22   1-0.23247 0.33470 0.69304-0.03155-0.68238 0.94179
  -1  16   8 1475.71  433.63   1-0.18496 0.08273 0.64998 0.01149-0.73709 0.99650
  -1  16  -8 1628.80  453.69   1 0.28627-0.38846 0.05809 0.60283-0.95638 0.69691
   1  16  -8 1193.20  372.05   1 0.34101-0.23882-0.03226 0.69319-0.93950 0.68003
  -1  16   8 1127.40  519.21   1 0.56457-0.66679 0.66732-0.00673-0.48572 0.74521
   1  16   8 1077.04  350.57   1 0.55446-0.45227 0.54912 0.11164-0.62532 0.88486
  -1  16  -8 1396.03  396.84   1 0.41381-0.51601 0.09792 0.56268-0.90508 0.64584
   1  16  -8 1729.93  574.68   1 0.35293-0.25069-0.03244 0.69327-0.93508 0.67566
   1  16   9 3663.98  643.75   1-0.26941 0.37155 0.72443-0.06371-0.63451 0.92622
  -1  16   9 4615.62  682.19   1-0.21657 0.11435 0.67901-0.01753-0.70144 0.99328
  -1  16  -9 4503.98  816.89   1 0.30411-0.40630 0.02930 0.63162-0.95218 0.66027
   1  16  -9 4990.31 1374.54   1 0.35937-0.25718-0.06381 0.72478-0.93100 0.63917
  -1  16   9 5441.68  838.00   1 0.56432-0.66653 0.69019-0.02960-0.45296 0.74488
   1  16   9 4958.99  828.67   1 0.55863-0.45644 0.57888 0.08188-0.59399 0.88597
  -1  16  -9 3603.04 1173.50   1 0.39679-0.49900 0.05960 0.60101-0.91596 0.62432
   1  16  -9 6133.40  643.29   1 0.33692-0.23469-0.06420 0.72503-0.93933 0.64749
   1  16  10  945.75  352.02   1-0.30462 0.40675 0.75175-0.09103-0.58486 0.90899
  -1  16  10 1402.40  415.16   1-0.24705 0.14482 0.70554-0.04405-0.66421 0.98847
  -1  16 -10 1158.31  534.57   1 0.32032-0.42251 0.00260 0.65832-0.94730 0.62296
   1  16 -10  861.94  385.57   1 0.37559-0.27340-0.09253 0.75350-0.92215 0.59789
  -1  16  10  614.46  289.60   1 0.56320-0.66542 0.71139-0.05080-0.42038 0.74473
   1  16  10  639.10  227.83   1 0.56169-0.45950 0.60705 0.05371-0.56212 0.88654
  -1  16 -10  701.16  196.95   1 0.37981-0.48202 0.02282 0.63778-0.92477 0.60073
   1  16 -10  459.24  253.66   1 0.32137-0.21913-0.09420 0.75503-0.94225 0.61797
   1  16  11  312.92  254.50   1-0.33735 0.43948 0.77497-0.11425-0.53441 0.89095
  -1  16  11 1189.44  505.86   1-0.27578 0.17365 0.72954-0.06882-0.62585 0.98239
  -1  16 -11  861.78  285.69   1 0.33499-0.43718-0.02202 0.68295-0.94196 0.58518
   1  16 -11  546.31  270.28   1 0.38989-0.28771-0.11845 0.77942-0.91320 0.55652
  -1  16  11  280.26  267.07   1 0.56130-0.66352 0.73099-0.07041-0.38805 0.74483
   1  16  11  889.57  386.71   1 0.56370-0.46152 0.63363 0.02713-0.52984 0.88671
  -1  16 -11  488.90  304.85   1 0.36288-0.46512-0.01220 0.67303-0.93175 0.57504
   1  16 -11  590.64  315.75   1 0.30638-0.20414-0.12236 0.78319-0.94401 0.58730
   1  16  12  331.82  257.36   1-0.36756 0.46969 0.79430-0.13357-0.48371 0.87266
  -1  16  12  735.71  431.99   1-0.30359 0.20146 0.75099-0.09026-0.58637 0.97532
  -1  16 -12 1235.44  416.59   1 0.34824-0.45042-0.04446 0.70543-0.93634 0.54723
   1  16 -12 1080.00  296.20   1 0.40247-0.30028-0.14171 0.80268-0.90439 0.51528
  -1  16  12 1140.76  459.06   1 0.55867-0.66089 0.74908-0.08850-0.35602 0.74524
   1  16  12  103.08  227.22   1 0.56444-0.46222 0.65868 0.00190-0.49753 0.88675
  -1  16 -12  796.88  327.92   1 0.34655-0.44879-0.04520 0.70603-0.93693 0.54780
   1  16 -12  374.47  356.69   1 0.29205-0.18982-0.14862 0.80945-0.94478 0.55565
  -1  16  13 1767.82  496.72   1-0.32996 0.22783 0.76993-0.10920-0.54619 0.96755
  -1  16 -13 1314.55  562.67   1 0.36008-0.46226-0.06505 0.72602-0.93064 0.50911
   1  16 -13 1140.52  478.66   1 0.41348-0.31129-0.16248 0.82345-0.89589 0.47436
  -1  16  13 1535.76  552.02   1 0.55538-0.65759 0.76573-0.10515-0.32433 0.74599
   1  16  13 1476.08  428.35   1 0.56451-0.46230 0.68211-0.02152-0.46480 0.88646
  -1  16 -13 1166.19  400.15   1 0.33082-0.43306-0.07607 0.73690-0.94062 0.51906
   1  16 -13 2285.34  667.09   1 0.27848-0.17624-0.17296 0.83379-0.94473 0.52317
  -1  16  14  620.07  408.25   1-0.35485 0.25272 0.78643-0.12571-0.50555 0.95933
  -1  16 -14  491.24  330.13   1 0.37065-0.47283-0.08371 0.74468-0.92499 0.47102
   1  16 -14 1621.16  613.06   1 0.42307-0.32089-0.18091 0.84188-0.88784 0.43388
  -1  16  14 1392.44  306.05   1 0.55186-0.65408 0.78092-0.12009-0.29257 0.74682
   1  16  14  984.17  427.32   1 0.56369-0.46148 0.70400-0.04342-0.43199 0.88608
  -1  16 -14 1114.97  299.08   1 0.31581-0.41805-0.10472 0.76555-0.94302 0.48903
   1  16 -14  787.20  329.85   1 0.26571-0.16347-0.19539 0.85622-0.94404 0.49005
  -1  16  15  414.10  208.34   1-0.37826 0.27612 0.80060-0.13988-0.46469 0.95088
  -1  16 -15  883.37  359.76   1 0.38003-0.48222-0.10053 0.76150-0.91949 0.43310
   1  16 -15  924.39  515.91   1 0.43140-0.32922-0.19717 0.85814-0.88034 0.39395
  -1  16  15  224.75  207.33   1 0.54740-0.64962 0.79491-0.13409-0.26163 0.74833
   1  16  15  952.32  367.47   1 0.56204-0.45982 0.72440-0.06381-0.39918 0.88571
  -1  16 -15  575.64  266.08   1 0.30165-0.40389-0.13110 0.79193-0.94436 0.45794
   1  16 -15  745.84  262.68   1 0.25380-0.15156-0.21592 0.87675-0.94284 0.45643
  -1  16 -16 1623.24  379.10   1 0.38832-0.49051-0.11558 0.77655-0.91424 0.39543
   1  16 -16 1099.13  381.00   1 0.43859-0.33641-0.21141 0.87238-0.87346 0.35464
  -1  16  16  389.87  274.81   1 0.54242-0.64463 0.80769-0.14686-0.23109 0.75024
   1  16  16  770.35  205.55   1 0.55960-0.45739 0.74334-0.08275-0.36644 0.88540
  -1  16 -16  461.83  274.41   1 0.28841-0.39065-0.15520 0.81603-0.94484 0.42600
   1  17   0 1330.84  427.03   1 0.08599 0.01619 0.34604 0.35619-0.93426 0.93426
  -1  17   0  734.73  331.67   1 0.06849-0.17068 0.36852 0.33371-0.92709 0.92709
  -1  17   0 1408.31  471.76   1 0.53150-0.63375 0.43592 0.26625-0.72626 0.72626
   1  17   0  712.79  335.20   1 0.48762-0.38538 0.28753 0.41464-0.82434 0.82434
  -1  17   1 1202.29  375.43   1 0.03774-0.13996 0.40699 0.29538-0.91265 0.94507
   1  17   1  705.23  514.56   1 0.04769 0.05449 0.39473 0.30750-0.91755 0.94998
  -1  17  -1  143.94  299.03   1 0.09812-0.20031 0.33023 0.37200-0.93878 0.90635
   1  17  -1  511.03  237.86   1 0.12258-0.02038 0.29774 0.40449-0.94674 0.91431
  -1  17   1 1260.78  503.19   1 0.53943-0.64161 0.47001 0.23204-0.69863 0.73108
  -1  17  -1  866.44  337.62   1 0.52231-0.62455 0.40055 0.30162-0.75282 0.72038
   1  17   1 1249.65  487.41   1 0.49953-0.39729 0.32366 0.37851-0.80355 0.83599
   1  17  -1  211.51  277.77   1 0.47491-0.37267 0.25117 0.45100-0.84342 0.81099
   1  17   2  821.65  288.36   1 0.00794 0.09427 0.44321 0.25915-0.89638 0.96122
  -1  17   2  819.51  367.53   1 0.00628-0.10849 0.44519 0.25717-0.89541 0.96025
  -1  17  -2  511.06  250.60   1 0.12653-0.22873 0.29241 0.40982-0.94788 0.88302
   1  17  -2  599.10  341.29   1 0.15716-0.05496 0.25044 0.45179-0.95528 0.89042
  -1  17   2  687.32  243.73   1 0.54632-0.64851 0.50289 0.19917-0.66979 0.73468
  -1  17  -2 1273.29  324.11   1 0.51199-0.61423 0.36420 0.33797-0.77795 0.71307
   1  17   2  972.99  354.67   1 0.51056-0.40832 0.35936 0.34281-0.78114 0.84601
   1  17  -2 1109.36  522.11   1 0.46129-0.35909 0.21472 0.48717-0.86087 0.79606
   1  17   3 1525.98  311.55   1-0.03259 0.13480 0.49067 0.21169-0.87073 0.96799
  -1  17   3  805.71  376.75   1-0.02576-0.07644 0.48282 0.21954-0.87533 0.97260
  -1  17  -3  842.06  486.80   1 0.15359-0.25578 0.25540 0.44683-0.95455 0.85726
   1  17  -3 1310.16  488.76   1 0.18952-0.08732 0.20467 0.49756-0.96030 0.86301
  -1  17   3 1050.35  256.89   1 0.55206-0.65425 0.53430 0.16775-0.64010 0.73743
   1  17   3  107.43  377.86   1 0.52062-0.41838 0.39441 0.30776-0.75722 0.85453
  -1  17  -3  801.50  306.38   1 0.50063-0.60287 0.32709 0.37508-0.80148 0.70417
   1  17  -3 1257.66  513.06   1 0.44733-0.34512 0.17861 0.52328-0.87635 0.77913
  -1  17   4 1262.71  460.26   1-0.05814-0.04406 0.51953 0.18283-0.85246 0.98215
   1  17   4  234.56  166.72   1-0.07354 0.17575 0.53652 0.16585-0.84067 0.97036
  -1  17  -4  577.57  269.01   1 0.17918-0.28137 0.21946 0.48277-0.95902 0.82930
   1  17  -4  933.95  291.98   1 0.21949-0.11730 0.16082 0.54141-0.96226 0.83253
  -1  17   4  990.16  257.58   1 0.55668-0.65887 0.56419 0.13787-0.60973 0.73950
   1  17   4  927.16  338.92   1 0.52968-0.42744 0.42864 0.27353-0.73191 0.86166
  -1  17  -4  690.26  532.62   1 0.48829-0.59053 0.28949 0.41268-0.82326 0.69351
   1  17  -4 1008.49  351.49   1 0.43291-0.33070 0.14296 0.55893-0.89002 0.76040
   1  17   5 1324.31  329.80   1-0.11458 0.21680 0.58022 0.12259-0.80635 0.96848
  -1  17   5 1283.15  290.86   1-0.09061-0.01159 0.55499 0.14737-0.82690 0.98901
  -1  17  -5 1928.56  541.18   1 0.20319-0.30538 0.18479 0.51744-0.96154 0.79936
   1  17  -5 1810.01  449.10   1 0.24711-0.14492 0.11925 0.58298-0.96162 0.79945
  -1  17   5 1621.13  505.89   1 0.56022-0.66241 0.59250 0.10956-0.57887 0.74108
   1  17   5 2324.46  602.33   1 0.53760-0.43541 0.46194 0.24012-0.70540 0.86761
  -1  17  -5 2111.98  470.74   1 0.47509-0.57733 0.25168 0.45049-0.84316 0.68098
   1  17  -5  900.08  373.03   1 0.41817-0.31596 0.10800 0.59389-0.90192 0.73990
   1  17   6  210.02  135.08   1-0.15487 0.25709 0.62100 0.08182-0.76835 0.96291
  -1  17   6  366.94  211.74   1-0.12305 0.02083 0.58898 0.11384-0.79872 0.99328
  -1  17  -6  576.88  292.36   1 0.22564-0.32783 0.15167 0.55056-0.96233 0.76772
   1  17  -6 1228.44  352.68   1 0.27233-0.17014 0.08017 0.62206-0.95885 0.76425
  -1  17   6  450.99  286.59   1 0.56272-0.66491 0.61920 0.08286-0.54765 0.74230
   1  17   6  764.21  314.24   1 0.54456-0.44237 0.49409 0.20796-0.67772 0.87238
  -1  17  -6 1747.54  407.22   1 0.46097-0.56317 0.21387 0.48802-0.86125 0.66682
   1  17  -6  187.50  191.80   1 0.40324-0.30104 0.07394 0.62795-0.91209 0.71766
   1  17   7 2661.50  374.61   1-0.19412 0.29634 0.65855 0.04427-0.72706 0.95405
  -1  17   7  912.20  368.08   1-0.15495 0.05273 0.62108 0.08174-0.76827 0.99525
  -1  17  -7 2805.88  835.76   1 0.24648-0.34867 0.12021 0.58202-0.96166 0.73462
   1  17  -7 1830.18  382.02   1 0.29522-0.19303 0.04372 0.65851-0.95442 0.72738
  -1  17   7 1763.50  401.34   1 0.56397-0.66618 0.64432 0.05754-0.51651 0.74355
   1  17   7 1082.84  352.05   1 0.55046-0.44827 0.52503 0.17702-0.64909 0.87619
  -1  17  -7 3042.47  525.11   1 0.44653-0.54873 0.17658 0.52531-0.87717 0.65033
   1  17  -7 2295.12  689.62   1 0.38828-0.28607 0.04098 0.66091-0.92062 0.69379
   1  17   8  604.33  230.41   1-0.23193 0.33415 0.69256 0.01025-0.68305 0.94246
  -1  17   8  639.99  216.44   1-0.18623 0.08401 0.65118 0.05164-0.73571 0.99512
  -1  17  -8  614.45  345.42   1 0.26571-0.36790 0.09052 0.61171-0.95979 0.70031
   1  17  -8  119.34  211.95   1 0.31588-0.21369 0.00996 0.69227-0.94874 0.68927
  -1  17   8  828.41  328.99   1 0.56458-0.66679 0.66786 0.03400-0.48498 0.74446
   1  17   8 1073.80  784.60   1 0.55531-0.45312 0.55468 0.14738-0.61964 0.87917
  -1  17  -8  500.13  264.46   1 0.43168-0.53389 0.14000 0.56189-0.89109 0.63185
   1  17  -8  408.25  387.45   1 0.37326-0.27103 0.00933 0.69280-0.92767 0.66825
   1  17   9  193.74  172.43   1-0.26734 0.36947 0.72276-0.02073-0.63729 0.92900
  -1  17   9  153.18  201.61   1-0.21669 0.11447 0.67912 0.02370-0.70130 0.99314
  -1  17  -9  111.42  193.72   1 0.28339-0.38558 0.06267 0.63956-0.95695 0.66504
   1  17  -9 1711.71  473.28   1 0.33444-0.23225-0.02108 0.72332-0.94217 0.65027
  -1  17   9  -30.79  274.13   1 0.56433-0.66654 0.68986 0.01200-0.45344 0.74536
   1  17   9  699.46  387.42   1 0.55913-0.45694 0.58297 0.11909-0.58950 0.88148
  -1  17  -9  177.00  251.03   1 0.41662-0.51883 0.10441 0.59748-0.90306 0.61141
   1  17  -9 1276.60  554.86   1 0.35860-0.25636-0.02096 0.72310-0.93325 0.64140
   1  17  10  328.01  209.01   1-0.30138 0.40351 0.74934-0.04732-0.58962 0.91374
  -1  17  10  635.06  319.26   1-0.24617 0.14395 0.70480-0.00197-0.66531 0.98958
  -1  17 -10  596.07  391.50   1 0.29955-0.40174 0.03671 0.66552-0.95337 0.62903
   1  17 -10  648.53  361.82   1 0.35108-0.24889-0.04938 0.75166-0.93504 0.61078
  -1  17  10  760.87  213.28   1 0.56328-0.66549 0.71037-0.00850-0.42199 0.74635
   1  17  10 1006.39  305.41   1 0.56195-0.45976 0.60986 0.09220-0.55881 0.88324
  -1  17 -10  735.60  251.10   1 0.40151-0.50372 0.07007 0.63182-0.91316 0.58911
   1  17 -10  705.41  202.06   1 0.34427-0.24203-0.04973 0.75187-0.93754 0.61327
   1  17  11 1162.91  370.30   1-0.33326 0.43539 0.77220-0.07018-0.54095 0.89749
  -1  17  11  716.23  376.34   1-0.27405 0.17192 0.72816-0.02614-0.62822 0.98476
  -1  17 -11 1213.10  461.11   1 0.31426-0.41645 0.01264 0.68959-0.94925 0.59247
   1  17 -11  863.12  284.36   1 0.36585-0.26367-0.07521 0.77749-0.92762 0.57094
  -1  17  11 1153.36  392.57   1 0.56148-0.66370 0.72944-0.02757-0.39069 0.74748
   1  17  11  982.12  347.15   1 0.56352-0.46131 0.63537 0.06649-0.52795 0.88474
  -1  17 -11  558.65  330.25   1 0.38653-0.48873 0.03719 0.66470-0.92152 0.56507
   1  17 -11 1352.73  459.09   1 0.33039-0.22816-0.07689 0.77902-0.94070 0.58400
  -1  17  12  665.75  250.00   1-0.30119 0.19906 0.74920-0.04717-0.58989 0.97885
  -1  17 -12 1150.03  368.79   1 0.32759-0.42978-0.00954 0.71178-0.94476 0.55555
   1  17 -12  212.82  303.77   1 0.37896-0.27677-0.09859 0.80087-0.92014 0.53103
  -1  17  12  903.42  324.46   1 0.55900-0.66122 0.74712-0.04525-0.35960 0.74882
   1  17  12  483.22  337.46   1 0.56446-0.46224 0.65943 0.04243-0.49651 0.88573
  -1  17 -12  158.64  175.61   1 0.37165-0.47389 0.00595 0.69618-0.92835 0.53922
   1  17 -12  485.46  375.26   1 0.31706-0.21482-0.10237 0.80450-0.94286 0.55373
  -1  17  13  285.16  315.16   1-0.32704 0.22491 0.76790-0.06588-0.55078 0.97214
  -1  17 -13  805.28  396.41   1 0.33962-0.44181-0.02989 0.73213-0.94008 0.51844
   1  17 -13  224.53  179.12   1 0.39053-0.28835-0.11962 0.82190-0.91278 0.49124
  -1  17  13  818.32  384.52   1 0.55588-0.65809 0.76349-0.06162-0.32874 0.75040
   1  17  13  343.77  117.94   1 0.56451-0.46230 0.68208 0.01978-0.46484 0.88650
  -1  17 -13  -19.53  229.04   1 0.35736-0.45960-0.02347 0.72560-0.93366 0.51210
   1  17 -13  646.22  211.44   1 0.30434-0.20210-0.12613 0.82826-0.94417 0.52261
  -1  17  14 1820.35  473.09   1-0.35155 0.24941 0.78433-0.08230-0.51111 0.96489
  -1  17 -14 1731.23  591.28   1 0.35046-0.45265-0.04831 0.75059-0.93532 0.48136
   1  17 -14  730.12  336.12   1 0.40072-0.29853-0.13845 0.84073-0.90567 0.45171
  -1  17  14  535.03  328.53   1 0.55254-0.65476 0.77849-0.07636-0.29770 0.75196
   1  17  14 1363.76  424.44   1 0.56373-0.46152 0.70333-0.00146-0.43303 0.88712
  -1  17 -14  244.58  230.48   1 0.34364-0.44588-0.05099 0.75312-0.93771 0.48372
   1  17 -14  805.44  374.43   1 0.29231-0.19007-0.14815 0.85029-0.94477 0.49078
  -1  18   0  632.33  359.33   1 0.05445-0.15664 0.38628 0.35726-0.92077 0.92077
   1  18   0  415.66  260.10   1 0.06774 0.03445 0.36948 0.37406-0.92676 0.92676
  -1  18   0  891.38  528.73   1 0.53549-0.63773 0.45241 0.29107-0.71313 0.71313
   1  18   0  584.57  193.70   1 0.49533-0.39309 0.31065 0.43282-0.81125 0.81125
  -1  18   1  593.94  230.85   1 0.02508-0.12729 0.42252 0.32116-0.90600 0.93842
   1  18   1 1275.98  426.40   1 0.03130 0.07090 0.41491 0.32877-0.90932 0.94174
  -1  18  -1 1113.66  453.00   1 0.08278-0.18498 0.35018 0.39335-0.93301 0.90058
   1  18  -1  968.13  345.43   1 0.10255-0.00036 0.32439 0.41915-0.94034 0.90791
  -1  18   1 1599.78  737.55   1 0.54245-0.64464 0.48395 0.25941-0.68668 0.71912
  -1  18  -1 1085.13  503.90   1 0.52741-0.62965 0.41978 0.32370-0.73865 0.70621
   1  18   1  724.26  223.13   1 0.50603-0.40379 0.34439 0.39909-0.79077 0.82321
   1  18  -1  563.31  236.14   1 0.48391-0.38167 0.27671 0.46677-0.83021 0.79777
  -1  18   2 1699.01  525.00   1-0.00492-0.09728 0.45850 0.28518-0.88867 0.95352
  -1  18  -2  308.36  277.33   1 0.11003-0.21223 0.31450 0.42904-0.94285 0.87799
   1  18  -2 1266.05  411.53   1 0.13563-0.03344 0.28008 0.46346-0.95034 0.88548
  -1  18   2  952.76  299.23   1 0.54854-0.65073 0.51447 0.22888-0.65910 0.72398
  -1  18  -2  829.15  211.14   1 0.51837-0.62061 0.38631 0.35717-0.76292 0.69804
   1  18   2  720.76  445.35   1 0.51593-0.41369 0.37774 0.36574-0.76884 0.83371
   1  18  -2 1777.00  609.75   1 0.47186-0.36962 0.24275 0.50073-0.84759 0.78271
  -1  18   3 2582.87  845.13   1-0.03547-0.06673 0.49397 0.24971-0.86875 0.96601
   1  18   3 1556.48  602.88   1-0.04441 0.14663 0.50413 0.23955-0.86248 0.95974
  -1  18  -3 1470.47  439.39   1 0.13606-0.23825 0.27950 0.46404-0.95045 0.85316
   1  18  -3 2077.05  784.90   1 0.16677-0.06457 0.23701 0.50653-0.95708 0.85979
  -1  18   3 5095.82 1035.85   1 0.55362-0.65581 0.54376 0.19960-0.63073 0.72806
   1  18   3 2312.10  825.59   1 0.52499-0.42275 0.41053 0.33295-0.74555 0.84286
   1  18  -3 4366.28 1032.95   1 0.45908-0.35688 0.20889 0.53429-0.86348 0.76626
   1  18   4  603.05  298.63   1-0.08306 0.18527 0.54686 0.19682-0.83308 0.96277
  -1  18   4  717.66  241.79   1-0.06635-0.03585 0.52862 0.21506-0.84625 0.97594
  -1  18  -4  950.53  323.92   1 0.16076-0.26295 0.24542 0.49812-0.95599 0.82627
   1  18  -4  768.41  457.99   1 0.19584-0.09365 0.19555 0.54799-0.96093 0.83122
  -1  18   4  542.42  200.82   1 0.55771-0.65990 0.57174 0.17162-0.60171 0.73148
   1  18   4  938.97  305.27   1 0.53314-0.43090 0.44260 0.30087-0.72100 0.85075
  -1  18  -4  391.05  221.87   1 0.49761-0.59985 0.31766 0.42582-0.80713 0.67738
   1  18  -4 1505.98  531.93   1 0.44610-0.34389 0.17551 0.56767-0.87760 0.74798
   1  18   5 1987.39  575.96   1-0.12186 0.22409 0.58776 0.15640-0.79980 0.96193
  -1  18   5 2487.71  759.45   1-0.09734-0.00486 0.56217 0.18151-0.82126 0.98337
  -1  18  -5 1163.42  499.99   1 0.18406-0.28625 0.21249 0.53105-0.95966 0.79752
   1  18  -5 1280.86  581.14   1 0.22275-0.12056 0.15598 0.58756-0.96231 0.80014
  -1  18   5 1279.50  393.00   1 0.56084-0.66303 0.59836 0.14500-0.57219 0.73441
   1  18   5 2770.52  880.64   1 0.54028-0.43809 0.47387 0.26949-0.69537 0.85758
  -1  18  -5 1047.08  410.62   1 0.48605-0.58829 0.28292 0.46055-0.82686 0.66467
   1  18  -5 1554.25  603.62   1 0.43280-0.33060 0.14270 0.60048-0.89012 0.72809
   1  18   6  292.28  216.62   1-0.16002 0.26224 0.62605 0.11811-0.76318 0.95774
  -1  18   6  989.96  381.24   1-0.12838 0.02616 0.59444 0.14972-0.79382 0.98838
  -1  18  -6 1875.33  630.53   1 0.20589-0.30808 0.18085 0.56269-0.96171 0.76711
   1  18  -6  488.47  408.59   1 0.24755-0.14536 0.11856 0.62498-0.96159 0.76698
  -1  18   6 1161.51  373.45   1 0.56305-0.66524 0.62359 0.11976-0.54230 0.73695
   1  18   6  483.67  377.90   1 0.54657-0.44438 0.50414 0.23921-0.66865 0.86330
  -1  18  -6   15.02  249.41   1 0.47385-0.57609 0.24823 0.49524-0.84488 0.65026
   1  18  -6 1465.77  470.08   1 0.41930-0.31710 0.11065 0.63253-0.90107 0.70664
   1  18   7  244.98  169.80   1-0.19732 0.29954 0.66151 0.08265-0.72350 0.95049
  -1  18   7  639.21  357.51   1-0.15895 0.05672 0.62500 0.11916-0.76426 0.99125
  -1  18  -7  469.13  333.60   1 0.22628-0.32847 0.15071 0.59283-0.96233 0.73529
   1  18  -7  891.38  256.19   1 0.27025-0.16806 0.08343 0.66010-0.95916 0.73212
  -1  18   7  845.99  262.39   1 0.56410-0.66631 0.64744 0.09571-0.51245 0.73949
   1  18   7 1446.49  627.73   1 0.55190-0.44971 0.53336 0.21000-0.64103 0.86813
  -1  18  -7 1126.38  385.65   1 0.46092-0.56312 0.21373 0.52945-0.86131 0.63448
   1  18  -7 1176.79  348.08   1 0.40573-0.30352 0.07953 0.66365-0.91052 0.68369
  -1  18   8  248.44  198.65   1-0.18899 0.08677 0.65377 0.09039-0.73270 0.99211
  -1  18  -8 1137.92  364.05   1 0.24520-0.34739 0.12215 0.62139-0.96174 0.70227
   1  18  -8  857.34  390.89   1 0.29089-0.18870 0.05068 0.69286-0.95541 0.69593
  -1  18   8 1006.87  447.11   1 0.56459-0.66680 0.66990 0.07324-0.48213 0.74161
   1  18   8  791.03  344.21   1 0.55629-0.45411 0.56143 0.18192-0.61263 0.87217
  -1  18  -8  991.66  274.04   1 0.44784-0.55005 0.17992 0.56326-0.87581 0.61658
   1  18  -8 1018.27  237.97   1 0.39219-0.28998 0.04949 0.69369-0.91855 0.65931
   1  18   9 1018.63  376.98   1-0.26734 0.36947 0.72275 0.02055-0.63729 0.92901
  -1  18   9 1098.78  410.18   1-0.21835 0.11612 0.68060 0.06356-0.69935 0.99119
  -1  18  -9 1174.49  393.81   1 0.26268-0.36487 0.09524 0.64829-0.96016 0.66826
   1  18  -9 1050.15  335.16   1 0.30959-0.20740 0.02033 0.72321-0.95065 0.65874
  -1  18   9 1948.36  533.76   1 0.56429-0.66651 0.69100 0.05214-0.45175 0.74366
   1  18   9 1615.52  358.84   1 0.55975-0.45756 0.58831 0.15504-0.58357 0.87555
  -1  18  -9 1631.12  361.34   1 0.43453-0.53673 0.14689 0.59628-0.88859 0.59695
   1  18  -9 1237.02  339.41   1 0.37880-0.27659 0.02066 0.72252-0.92524 0.63360
   1  18  10  625.59  266.00   1-0.30019 0.40233 0.74845-0.00513-0.59135 0.91548
  -1  18  10  456.40  344.81   1-0.24685 0.14463 0.70537 0.03879-0.66446 0.98872
  -1  18 -10  500.67  228.72   1 0.27875-0.38094 0.07004 0.67350-0.95780 0.63346
   1  18 -10  434.42  283.26   1 0.32645-0.22426-0.00762 0.75117-0.94518 0.62084
  -1  18  10  867.25  492.12   1 0.56325-0.66546 0.71076 0.03238-0.42136 0.74572
   1  18  10  520.59  170.74   1 0.56230-0.46011 0.61396 0.12940-0.55395 0.87837
  -1  18 -10  199.39  154.60   1 0.42112-0.52332 0.11489 0.62829-0.89969 0.57565
   1  18 -10  784.88  398.66   1 0.36551-0.26328-0.00678 0.75022-0.93077 0.60650
   1  18  11  637.40  388.43   1-0.33116 0.43329 0.77076-0.02744-0.54429 0.90083
  -1  18  11  938.40  338.25   1-0.27386 0.17173 0.72801 0.01530-0.62848 0.98502
   1  18 -11  748.62  264.14   1 0.34163-0.23944-0.03312 0.77671-0.93924 0.58256
  -1  18  11  887.32  262.04   1 0.56151-0.66372 0.72923 0.01392-0.39105 0.74784
   1  18  11  213.76  251.83   1 0.56368-0.46147 0.63836 0.10478-0.52415 0.88094
  -1  18 -11  382.00  184.33   1 0.40775-0.50995 0.08409 0.65909-0.90921 0.55275
   1  18 -11  410.89  375.27   1 0.35272-0.25048-0.03287 0.77630-0.93515 0.57844
   1  18  12  700.36  514.90   1-0.36013 0.46227 0.78975-0.04644-0.49656 0.88552
  -1  18  12  628.73  272.27   1-0.30030 0.19817 0.74853-0.00521-0.59120 0.98015
  -1  18 -12 1182.71  541.47   1 0.30686-0.40905 0.02481 0.71873-0.95142 0.56221
  -1  18  12 1783.08  636.24   1 0.55911-0.66133 0.74643-0.00327-0.36086 0.75008
   1  18  12 2280.73  588.64   1 0.56450-0.46228 0.66148 0.08167-0.49373 0.88296
  -1  18 -12  930.88  375.88   1 0.39456-0.49677 0.05468 0.68849-0.91723 0.52838
   1  18 -12  634.08  206.55   1 0.34036-0.23812-0.05746 0.80090-0.93853 0.54940
   1  19   0  634.26  318.68   1 0.04936 0.05282 0.39265 0.39220-0.91836 0.91836
  -1  19   0  293.22  166.42   1 0.03988-0.14209 0.40435 0.38065-0.91373 0.91373
  -1  19   0  823.64  274.99   1 0.53925-0.64143 0.46921 0.31544-0.69932 0.69932
   1  19   0 1106.17  404.88   1 0.50267-0.40043 0.33356 0.45122-0.79752 0.79752
   1  19   1 1991.58  515.81   1 0.01470 0.08750 0.43509 0.34991-0.90026 0.93268
  -1  19   1 3159.19  665.68   1 0.01188-0.11409 0.43848 0.34651-0.89865 0.93107
   1  19  -1 2416.07  717.08   1 0.08258 0.01960 0.35045 0.43440-0.93293 0.90050
  -1  19  -1 2231.17  738.92   1 0.06716-0.16936 0.37021 0.41464-0.92651 0.89408
  -1  19   1 2902.68  658.33   1 0.54546-0.64765 0.49854 0.28611-0.67373 0.70617
  -1  19  -1 2471.21  830.48   1 0.53230-0.63454 0.43915 0.34563-0.72373 0.69129
   1  19   1 3250.05  492.29   1 0.51226-0.41002 0.36511 0.41967-0.77734 0.80978
   1  19  -1 3172.52  524.05   1 0.49242-0.39018 0.30183 0.48295-0.81634 0.78390
   1  19   2 2398.97  519.61   1-0.02083 0.12304 0.47712 0.30788-0.87859 0.94343
  -1  19   2 1623.21  371.01   1-0.01680-0.08540 0.47243 0.31256-0.88120 0.94604
  -1  19  -2  785.81  330.15   1 0.09334-0.19553 0.33647 0.44837-0.93705 0.87219
   1  19  -2  666.15  260.35   1 0.11428-0.01209 0.30885 0.47600-0.94421 0.87935
  -1  19   2  687.55  240.46   1 0.55079-0.65298 0.52692 0.25773-0.64728 0.71216
   1  19   2  679.07  354.88   1 0.52115-0.41891 0.39632 0.38846-0.75585 0.82073
   1  19  -2  816.42  261.43   1 0.48161-0.37937 0.27007 0.51471-0.83373 0.76885
   1  19   3 1702.29  327.34   1-0.05707 0.15928 0.51833 0.26666-0.85327 0.95053
  -1  19   3 1996.70  410.07   1-0.04599-0.05621 0.50591 0.27908-0.86135 0.95861
  -1  19  -3 1094.83  466.69   1 0.11842-0.22061 0.30332 0.48152-0.94549 0.84821
   1  19  -3 1184.28  364.22   1 0.14428-0.04208 0.26825 0.51659-0.95248 0.85519
  -1  19   3  852.52  447.45   1 0.55524-0.65743 0.55424 0.23041-0.62009 0.71741
   1  19   3 2108.19  742.48   1 0.52928-0.42703 0.42704 0.35774-0.73314 0.83045
  -1  19  -3 1324.18  378.76   1 0.51568-0.61792 0.37686 0.40793-0.76944 0.67213
   1  19  -3 1151.11  359.14   1 0.47007-0.36787 0.23836 0.54611-0.84983 0.75261
  -1  19   4 1407.40  488.45   1-0.07550-0.02670 0.53866 0.24634-0.83912 0.96881
   1  19   4 1252.84  551.86   1-0.09366 0.19587 0.55825 0.22675-0.82436 0.95405
  -1  19  -4 1131.55  442.65   1 0.14229-0.24448 0.27098 0.51387-0.95200 0.82229
   1  19  -4  619.22  337.93   1 0.17245-0.07025 0.22900 0.55584-0.95802 0.82830
  -1  19   4 1030.51  255.87   1 0.55882-0.66101 0.58044 0.20421-0.59228 0.72205
   1  19   4 1197.56  506.69   1 0.53650-0.43431 0.45715 0.32750-0.70934 0.83911
  -1  19  -4  802.13  347.04   1 0.50623-0.60847 0.34506 0.43972-0.79035 0.66060
   1  19  -4 1475.84  554.01   1 0.45839-0.35618 0.20707 0.57739-0.86428 0.73466
   1  19   5  206.32  207.35   1-0.13046 0.23269 0.59656 0.18894-0.79188 0.95401
  -1  19   5  -21.48  254.77   1-0.10514 0.00293 0.57042 0.21458-0.81459 0.97670
  -1  19  -5  295.94  201.22   1 0.16489-0.26709 0.23964 0.54521-0.95675 0.79460
   1  19  -5 -218.75  261.54   1 0.19872-0.09653 0.19137 0.59347-0.96118 0.79904
  -1  19   5  539.26  256.75   1 0.56154-0.66373 0.60547 0.17918-0.56397 0.72618
   1  19   5  645.95  395.38   1 0.54300-0.44081 0.48652 0.29813-0.68442 0.84664
  -1  19  -5  582.36  274.21   1 0.49612-0.59836 0.31308 0.47170-0.80983 0.64764
   1  19  -5  -14.56  347.93   1 0.44640-0.34420 0.17627 0.60820-0.87729 0.71527
   1  19   6  283.33  136.65   1-0.16669 0.26891 0.63253 0.15297-0.75637 0.95093
  -1  19   6  533.85  327.45   1-0.13489 0.03266 0.60105 0.18445-0.78773 0.98229
  -1  19  -6  394.51  215.51   1 0.18618-0.28837 0.20946 0.57539-0.95992 0.76535
   1  19  -6 1591.17  481.02   1 0.22303-0.12084 0.15556 0.62929-0.96231 0.76771
  -1  19   6  322.39  128.64   1 0.56344-0.66563 0.62929 0.15536-0.53527 0.72992
   1  19   6  243.89  190.55   1 0.54864-0.44646 0.51505 0.26961-0.65856 0.85321
  -1  19  -6  684.19  235.09   1 0.48544-0.58768 0.28112 0.50366-0.82783 0.63321
   1  19  -6  336.04  337.84   1 0.43421-0.33200 0.14611 0.63836-0.88888 0.69445
   1  19   7  830.09  259.16   1-0.20219 0.30442 0.66600 0.11951-0.71802 0.94500
  -1  19   7 1550.95  437.84   1-0.16421 0.06198 0.63013 0.15537-0.75892 0.98590
  -1  19  -7  631.47  437.41   1 0.20610-0.30829 0.18055 0.60430-0.96172 0.73468
   1  19  -7 1968.36  628.72   1 0.24546-0.14327 0.12175 0.66310-0.96172 0.73468
  -1  19   7 1387.41  413.04   1 0.56426-0.66647 0.65189 0.13254-0.50660 0.73364
   1  19   7  661.53  347.58   1 0.55344-0.45125 0.54264 0.24201-0.63185 0.85895
  -1  19  -7 1611.66  355.02   1 0.47427-0.57651 0.24940 0.53538-0.84430 0.61724
   1  19  -7  679.31  331.92   1 0.42191-0.31970 0.11674 0.66772-0.89908 0.67225
   1  19   8  347.36  260.94   1-0.23668 0.33891 0.69668 0.08882-0.67720 0.93661
  -1  19   8 1448.63  613.00   1-0.19309 0.09087 0.65759 0.12791-0.72820 0.98761
  -1  19  -8  688.77  329.20   1 0.22470-0.32689 0.15308 0.63177-0.96232 0.70285
   1  19  -8  860.86  343.70   1 0.26602-0.16383 0.09004 0.69481-0.95975 0.70027
  -1  19   8  450.61  292.66   1 0.56459-0.66681 0.67328 0.11115-0.47740 0.73688
   1  19   8  846.29  323.36   1 0.55737-0.45519 0.56923 0.21542-0.60439 0.86393
  -1  19  -8  363.23  234.28   1 0.46252-0.56473 0.21799 0.56647-0.85938 0.60014
   1  19  -8  723.63  382.28   1 0.40961-0.30740 0.08831 0.69616-0.90797 0.64873
   1  19   9  986.86  329.35   1-0.26918 0.37131 0.72424 0.06036-0.63482 0.92654
  -1  19   9 1704.51  585.39   1-0.22138 0.11916 0.68330 0.10220-0.69576 0.98759
  -1  19  -9 2467.98  896.07   1 0.24195-0.34414 0.12710 0.65775-0.96192 0.67001
   1  19  -9 1672.63  479.23   1 0.28478-0.18259 0.06047 0.72438-0.95668 0.66477
  -1  19   9 1712.88  755.78   1 0.56420-0.66642 0.69346 0.09098-0.44808 0.74000
   1  19   9 1524.03  312.98   1 0.56046-0.45828 0.59476 0.18989-0.57630 0.86828
  -1  19  -9 2522.96  530.48   1 0.45078-0.55298 0.18737 0.59709-0.87274 0.58110
   1  19  -9 1622.15  411.70   1 0.39740-0.29519 0.06093 0.72354-0.91561 0.62397
   1  19  10  821.45  289.82   1-0.30086 0.40299 0.74895 0.03565-0.59037 0.91450
  -1  19  10  747.96  429.43   1-0.24894 0.14671 0.70713 0.07837-0.66180 0.98606
  -1  19 -10 1195.86  232.60   1 0.25789-0.36008 0.10266 0.68218-0.96070 0.63636
   1  19 -10   14.51  239.61   1 0.30180-0.19961 0.03305 0.75179-0.95279 0.62845
  -1  19  10  798.65  311.60   1 0.56312-0.66534 0.71244 0.07200-0.41870 0.74305
   1  19  10  502.76  309.43   1 0.56272-0.46053 0.61920 0.16546-0.54765 0.87208
  -1  19 -10 1049.75  342.89   1 0.43890-0.54111 0.15759 0.62687-0.88460 0.56055
   1  19 -10  646.05  303.45   1 0.38537-0.28317 0.03471 0.74976-0.92210 0.59805
  -1  20   0  818.24  346.93   1 0.02503-0.12724 0.42257 0.40374-0.90598 0.90598
   1  20   0  713.89  204.56   1 0.03067 0.07153 0.41568 0.41063-0.90899 0.90899
  -1  20   0  342.11  196.79   1 0.54299-0.64517 0.48648 0.33947-0.68446 0.68446
   1  20   0 1253.04  334.17   1 0.50964-0.40740 0.35629 0.46979-0.78314 0.78314
  -1  20   1  463.93  160.44   1-0.00182-0.10038 0.45483 0.37148-0.89057 0.92299
   1  20   1  329.01  244.49   1-0.00223 0.10444 0.45532 0.37099-0.89032 0.92274
  -1  20  -1  454.24  156.79   1 0.05125-0.15344 0.39029 0.43586-0.91926 0.88683
   1  20  -1  298.55  190.60   1 0.06260 0.03958 0.37600 0.45015-0.92449 0.89207
  -1  20   1 -109.26  264.86   1 0.54839-0.65058 0.51370 0.31225-0.65982 0.69226
  -1  20  -1  464.56  327.06   1 0.53682-0.63901 0.45853 0.36742-0.70821 0.67577
   1  20   1 1333.61  490.29   1 0.51823-0.41599 0.38584 0.44025-0.76325 0.79569
   1  20  -1  718.27  414.80   1 0.50046-0.39822 0.32658 0.49950-0.80179 0.76935
   1  20   2  595.41  238.28   1-0.03604 0.13825 0.49462 0.33169-0.86835 0.93320
  -1  20   2  833.23  223.23   1-0.02930-0.07290 0.48690 0.33941-0.87296 0.93780
  -1  20  -2  915.05  320.39   1 0.07644-0.17863 0.35835 0.46780-0.93044 0.86558
   1  20  -2  182.99  217.23   1 0.09303 0.00915 0.33688 0.48927-0.93693 0.87207
  -1  20   2  449.81  200.20   1 0.55303-0.65521 0.54010 0.28585-0.63438 0.69926
  -1  20  -2  313.46  117.62   1 0.53006-0.63230 0.43013 0.39595-0.73076 0.66588
   1  20   2  523.95  371.33   1 0.52619-0.42395 0.41508 0.41101-0.74217 0.80705
   1  20  -2  630.45  454.47   1 0.49076-0.38852 0.29685 0.52924-0.81916 0.75428
  -1  20   3  276.86  210.91   1-0.05725-0.04495 0.51854 0.30777-0.85313 0.95039
   1  20   3  383.14  174.16   1-0.07047 0.17268 0.53316 0.29316-0.84307 0.94033
  -1  20  -3  750.32  390.46   1 0.10063-0.20283 0.32692 0.49924-0.93967 0.84238
   1  20  -3   71.61  162.89   1 0.12196-0.01976 0.29857 0.52758-0.94655 0.84927
  -1  20   3 1203.70  500.10   1 0.55688-0.65907 0.56560 0.26035-0.60825 0.70557
   1  20   3 -318.64  348.89   1 0.53346-0.43122 0.44389 0.38219-0.71998 0.81729
  -1  20  -3  726.41  182.46   1 0.52246-0.62470 0.40113 0.42495-0.75240 0.65509
   1  20  -3  705.32  328.07   1 0.48061-0.37837 0.26723 0.55886-0.83521 0.73790
   1  20   4  554.21  185.33   1-0.10522 0.20743 0.57050 0.25581-0.81452 0.94420
  -1  20   4  717.60  422.32   1-0.08551-0.01669 0.54951 0.27680-0.83109 0.96078
  -1  20  -4  231.05  243.37   1 0.12373-0.22593 0.29618 0.52997-0.94707 0.81736
   1  20  -4  190.56  195.10   1 0.14926-0.04707 0.26139 0.56477-0.95362 0.82390
  -1  20   4  535.23  260.03   1 0.55996-0.66215 0.59014 0.23581-0.58152 0.71129
   1  20   4 1044.29  288.55   1 0.53990-0.43772 0.47217 0.35378-0.69681 0.82658
  -1  20  -4  665.50  174.41   1 0.51422-0.61646 0.37181 0.45427-0.77286 0.64311
   1  20  -4  251.86  351.05   1 0.46986-0.36765 0.23778 0.58797-0.85010 0.72049
   1  20   5   35.99  251.75   1-0.14023 0.24246 0.60644 0.22040-0.78265 0.94479
  -1  20   5  390.14  175.13   1-0.11410 0.01188 0.57973 0.24712-0.80677 0.96891
  -1  20  -5  693.56  290.28   1 0.14568-0.24787 0.26633 0.55983-0.95280 0.79066
   1  20  -5   53.61  206.65   1 0.17487-0.07267 0.22558 0.60058-0.95840 0.79625
  -1  20   5 1103.68  312.14   1 0.56227-0.66446 0.61365 0.21230-0.55431 0.71652
   1  20   5  540.61  347.25   1 0.54571-0.44352 0.49980 0.32615-0.67259 0.83481
  -1  20  -5 1647.74  406.32   1 0.50539-0.60763 0.34233 0.48375-0.79207 0.62988
   1  20  -5  276.75  358.46   1 0.45907-0.35686 0.20885 0.61690-0.86350 0.70147
   1  20   6   35.35  161.17   1-0.17470 0.27692 0.64024 0.18660-0.74803 0.94259
  -1  20   6 1491.14  368.78   1-0.14246 0.04024 0.60868 0.21817-0.78052 0.97507
  -1  20  -6  480.51  224.87   1 0.16642-0.26861 0.23750 0.58865-0.95702 0.76244
   1  20  -6  269.25  244.78   1 0.19874-0.09654 0.19135 0.63480-0.96118 0.76661
  -1  20   6  814.76  299.66   1 0.56356-0.66578 0.63610 0.18962-0.52703 0.72164
   1  20   6  879.02  369.66   1 0.55075-0.44856 0.52669 0.29926-0.64750 0.84215
  -1  20  -6  839.16  341.24   1 0.49605-0.59829 0.31287 0.51322-0.80996 0.61533
   1  20  -6  376.79  386.25   1 0.44806-0.34586 0.18047 0.64528-0.87559 0.68116
  -2   0   0 1924.28  321.52   1-0.10221-0.10221 0.56732-0.56732-0.81712 0.81712
   2   0   0 1484.08  173.17   1 0.10219 0.10219 0.32487-0.32487-0.94021 0.94021
  -2   0   115482.96  395.30   1-0.21613 0.01168 0.67861-0.67861-0.70197 0.73439
   2   0  -116862.82  472.16   1-0.03324 0.23766 0.49142-0.49142-0.87028 0.83786
  -2   0  -117158.12  414.35   1 0.04015-0.24457 0.40401-0.40401-0.91386 0.88144
   2   0   115354.36  490.85   1 0.25723-0.05285 0.10369-0.10369-0.96076 0.99320
   2   0   116943.90  398.77   1 0.25434-0.04987-0.21499 0.21499-0.94291 0.97534
  -2   0   2182200.7 3030.90   1-0.30012 0.09586 0.74839-0.74839-0.59146 0.65628
   2   0  -2177357.2 2891.42   1-0.13679 0.34124 0.60298-0.60298-0.78593 0.72108
  -2   0  -2180218.3 2930.11   1 0.19234-0.39673 0.20060-0.20060-0.96060 0.89574
   2   0   2179634.7 2885.89   1 0.40002-0.19565-0.13716 0.13716-0.90618 0.97103
   2   0   2180505.2 2921.36   1 0.40192-0.19751 0.07098-0.07098-0.91291 0.97772
  -2   0   3 6088.23  614.42   1-0.36097 0.15671 0.79027-0.79027-0.49512 0.59236
   2   0  -3 5457.46  763.08   1-0.21131 0.41576 0.67428-0.67428-0.70758 0.61030
  -2   0  -3 5637.52  437.31   1 0.32489-0.52927-0.00502 0.00502-0.94573 0.84843
   2   0   3 5878.98  312.96   1 0.50197-0.29759-0.34770 0.34770-0.79191 0.88912
   2   0   3 6199.36  323.47   1 0.50384-0.29935 0.33730-0.33730-0.79521 0.89252
  -2   0  -3 6792.36  578.99   1 0.32281-0.52728-0.09146 0.09146-0.94203 0.84475
   2   0  -4 1886.12  406.25   1-0.26403 0.46829 0.72006-0.72006-0.64171 0.51206
  -2   0  -4 1715.35  231.88   1 0.42117-0.62554-0.17722 0.17722-0.88949 0.75979
   2   0   4 1597.16  190.99   1 0.56060-0.35620-0.50350 0.50350-0.65741 0.78714
   2   0   4 1710.06  211.87   1 0.55158-0.34720 0.53147-0.53147-0.64287 0.77264
  -2   0  -4 1756.55  230.61   1 0.42518-0.62959 0.12447-0.12447-0.89650 0.76688
   2   0  -532759.11  733.95   1-0.30138 0.50564 0.74934-0.74934-0.58962 0.42755
  -2   0  -534185.56  713.37   1 0.48365-0.68804-0.30598 0.30598-0.82003 0.65800
   2   0   531461.50  662.51   1 0.58842-0.38402-0.60904 0.60904-0.53180 0.69396
   2   0   531556.25  781.07   1 0.56437-0.35994 0.65573-0.65573-0.50148 0.66366
  -2   0  -533132.21  713.99   1 0.48747-0.69195 0.28708-0.28708-0.82458 0.66240
   2   0  -6  699.83  188.62   1-0.32810 0.53236 0.76864-0.76864-0.54912 0.35464
  -2   0  -6  163.73  134.20   1 0.52262-0.72701-0.39786 0.39786-0.75403 0.55960
   2   0   6  563.19  123.79   1 0.59877-0.39429-0.67913 0.67913-0.42454 0.61911
   2   0   6  797.01  193.61   1 0.56106-0.35662 0.73295-0.73295-0.38469 0.57930
  -2   0  -6  302.94   73.70   1 0.52213-0.72661 0.39989-0.39989-0.75330 0.55867
   2   0  -7 4711.58  706.00   1-0.34734 0.55161 0.78161-0.78161-0.51810 0.29121
  -2   0  -7 4455.22  290.92   1 0.54689-0.75129-0.46237 0.46237-0.69793 0.47091
   2   0   7 5188.31  625.97   1 0.59995-0.39547-0.72659 0.72659-0.33484 0.56183
   2   0   7 5485.46  772.58   1 0.55164-0.34721 0.78168-0.78168-0.29095 0.51808
  -2   0  -7 5329.52  594.15   1 0.54103-0.74541 0.47732-0.47732-0.69241 0.46532
   2   0  -8 7148.61 1119.08   1-0.36124 0.56550 0.79044-0.79044-0.49467 0.23537
  -2   0  -8 8230.41  401.84   1 0.56195-0.76635-0.50778 0.50778-0.65296 0.39350
   2   0   8 6237.95  796.41   1 0.59664-0.39216-0.75929 0.75929-0.25977 0.51930
   2   0  -8 7720.06  515.33   1 0.50208-0.29755-0.84473 0.84473 0.18528-0.44484
   2   0   8 8730.28  802.04   1 0.53949-0.33506 0.81417-0.81417-0.21460 0.47417
  -2   0  -8 7732.08  718.76   1 0.55131-0.75569 0.52992-0.52992-0.64437 0.38483
   2   0  -946457.82 1312.14   1-0.37120 0.57547 0.79648-0.79648-0.47729 0.18558
  -2   0  -950196.18 1374.73   1 0.57156-0.77596-0.54006 0.54006-0.61776 0.32588
   2   0   948138.60 1315.55   1 0.59063-0.38615-0.78275 0.78275-0.19606 0.48803
   2   0  -944725.67 1332.35   1 0.51600-0.31147-0.84442 0.84442 0.14380-0.43580
   2   0   947822.27 1318.04   1 0.52677-0.32234 0.83644-0.83644-0.15120 0.44322
  -2   0  -948106.51 1474.73   1 0.55699-0.76137 0.56641-0.56641-0.60739 0.31541
  -2   0 -10 5411.23  835.26   1 0.57781-0.78221-0.56317 0.56317-0.59073 0.26642
   2   0  10 4239.16  750.30   1 0.58334-0.37886-0.79988 0.79988-0.14104 0.46545
   2   0 -10 5372.46  603.79   1 0.52776-0.32322-0.84275 0.84275 0.10600-0.43045
   2   0  10 4998.33  851.82   1 0.51415-0.30972 0.85215-0.85215-0.09731 0.42178
  -2   0 -10 4969.43  525.34   1 0.56016-0.76454 0.59196-0.59196-0.57947 0.25504
  -2   0 -1118952.45 1053.50   1 0.58192-0.78633-0.57970 0.57970-0.57035 0.21360
   2   0  1118382.46  807.76   1 0.57539-0.37091-0.81260 0.81260-0.09270 0.44955
   2   0 -1117198.21 2014.94   1 0.53782-0.33328-0.84005 0.84005 0.07116-0.42805
  -2   0 -1119069.48 1068.93   1 0.56195-0.76632 0.60989-0.60989-0.55878 0.20191
  -2   0 -12  523.28  189.57   1 0.58465-0.78905-0.59142 0.59142-0.55533 0.16615
   2   0  12  278.69  190.47   1 0.56708-0.36260-0.82216 0.82216-0.04952 0.43881
   2   0 -12  693.32  302.42   1 0.54652-0.34199-0.83654 0.83654 0.03871-0.42805
  -2   0 -12  339.74   91.23   1 0.56296-0.76734 0.62234-0.62234-0.54384 0.15453
  -2   0 -13 8748.28 1277.52   1 0.58643-0.79083-0.59952 0.59952-0.54466 0.12305
   2   0 -13 9034.05 1356.55   1 0.55413-0.34960-0.83238 0.83238 0.00823-0.43001
  -2   0 -13 8473.32  849.11   1 0.56353-0.76791 0.63073-0.63073-0.53347 0.11172
  -2   0 -14 5140.92  780.88   1 0.58756-0.79196-0.60483 0.60483-0.53753 0.08349
   2   0 -14 4890.86  839.69   1 0.56082-0.35628-0.82768 0.82768-0.02063-0.43359
  -2   0 -15 3859.68  496.83   1 0.58820-0.79260-0.60793 0.60793-0.53332 0.04684
   2   0 -15 3569.84  499.72   1 0.56679-0.36231-0.82245 0.82245-0.04809-0.43851
  -2   0 -16 8280.44 1454.56   1 0.58846-0.79287-0.60925 0.60925-0.53151 0.01260
   2   0 -1610940.91  724.23   1 0.57202-0.36754-0.81685 0.81685-0.07445-0.44459
  -2   0 -1716218.56 2365.60   1 0.58843-0.79284-0.60911 0.60911-0.53171-0.01962
   2   0 -1715634.19  755.81   1 0.57665-0.37217-0.81086 0.81086-0.09984-0.45164
  -2   0 -18  233.42  228.66   1 0.58815-0.79255-0.60772 0.60772-0.53360-0.05016
   2   0 -18  -10.01  374.20   1 0.58077-0.37629-0.80450 0.80450-0.12439-0.45953
  -2   0 -19  154.15  271.47   1 0.58765-0.79205-0.60528 0.60528-0.53693-0.07926
   2   0 -19 1001.93  607.18   1 0.58440-0.37992-0.79780 0.79780-0.14822-0.46814
  -2   0 -20  617.51  317.16   1 0.58694-0.79134-0.60190 0.60190-0.54148-0.10714
   2   0 -20 1214.60  626.26   1 0.58760-0.38312-0.79077 0.79077-0.17143-0.47737
  -2   0 -21  335.94  227.72   1 0.58604-0.79044-0.59770 0.59770-0.54708-0.13397
   2   0 -21 1266.97  448.95   1 0.59040-0.38592-0.78341 0.78341-0.19410-0.48715
  -2   0 -22 4946.41  800.31   1 0.58495-0.78935-0.59275 0.59275-0.55360-0.15989
   2   0 -22 3810.47  520.19   1 0.59282-0.38834-0.77573 0.77573-0.21629-0.49740
  -2   0 -23 1460.60  557.17   1 0.58367-0.78807-0.58711 0.58711-0.56090-0.18502
   2   0 -23 1264.22  447.41   1 0.59489-0.39041-0.76774 0.76774-0.23805-0.50808
  -2   0 -24 1060.78  407.90   1 0.58220-0.78660-0.58084 0.58084-0.56890-0.20945
   2   0 -24 1986.76  692.52   1 0.59662-0.39214-0.75942 0.75942-0.25944-0.51912
  -2   0 -25  820.42  430.61   1 0.58053-0.78493-0.57397 0.57397-0.57751-0.23327
   2   0 -25 -131.04  345.54   1 0.59801-0.39353-0.75079 0.75079-0.28050-0.53050
  -2  -1   0 8347.61  208.77   1-0.24949 0.04504 0.70760-0.74894-0.66109 0.66109
  -2   1   0 8467.25  761.36   1-0.01202-0.19239 0.46685-0.42554-0.88425 0.88425
   2   1   0 8073.77  268.20   1 0.01965 0.18476 0.42910-0.38779-0.90303 0.90303
   2  -1   0 8237.63  280.72   1 0.15702 0.04736 0.25064-0.29194-0.95526 0.95526
  -2  -1   142466.12  817.37   1-0.34890 0.14463 0.78262-0.82391-0.51553 0.54794
  -2   1   143673.81  858.08   1-0.11824-0.08620 0.58402-0.54268-0.80307 0.83550
   2   1  -144133.72  804.82   1-0.13765 0.34210 0.60384-0.56250-0.78512 0.75269
  -2  -1  -144065.42  767.29   1-0.08964-0.11477 0.55395-0.59526-0.82770 0.79528
   2  -1  -143934.08  862.76   1 0.04430 0.16011 0.39887-0.44018-0.91593 0.88351
  -2   1  -143175.28 1008.96   1 0.10525-0.30963 0.32084-0.27953-0.94126 0.90883
   2   1   144289.57  773.50   1 0.23330-0.02892 0.14018-0.09887-0.96224 0.99467
   2  -1   141804.53  851.69   1 0.27603-0.07165 0.07433-0.11564-0.95826 0.99070
   2   1   143193.22  839.15   1 0.28970-0.08522-0.15288 0.19418-0.94482 0.97725
   2   1  -258894.35 1270.06   1-0.23858 0.44303 0.69832-0.65698-0.67484 0.60999
  -2   1   255872.23 1065.96   1-0.20710 0.00265 0.67047-0.62913-0.71244 0.77729
   2  -1  -256651.18 1100.45   1-0.05169 0.25611 0.51232-0.55364-0.85723 0.79239
  -2  -1  -258128.33  995.95   1 0.12418-0.32856 0.29559-0.33690-0.94720 0.88234
  -2   1  -257451.41 1051.74   1 0.22085-0.42523 0.15880-0.11749-0.96229 0.89742
[truncated: 795,703 more chars]
